# Supplementary material for: Tissue-specific O-GlcNAcylation profiling identifies substrates in translational machinery in Drosophila mushroom body contributing to olfactory learning
Source: eLife journal article supplement (doi:10.7554/elife.91269), 2024-03-15
Supplement: fig1-data1 [file elife-91269-fig1-data1-v1.zip]

## Sheet: C
Figure 1C
Fluorescent intensity of O-GlcNAc staining in brains.
Elav-Gal4
CpOGADM	CpOGAWT
40.208	19.281
35.061	15.31
38.651	16.218
32.677	18.896
P value < 0.0001
P values were determined by unpaired t-test

## Sheet: E
Figure 1E
Fluorescent intensity		Relative fluorescent intnesity (Mushroom body/Whole brain)	Fluorescent intensity		Relative fluorescent intnesity (Mushroom body/Whole brain)
Mushroom body	Whole brain		Mushroom body	Whole brain
OK107-Gal4>CpOGADM			OK107-Gal4>CpOGAWT
38.168	33.566	1.1371	26.906	32.312	0.832694
32.172	33.566	0.95847	26.94	32.312	0.833746
30.024	34.975	0.858442	17.491	33.158	0.527505
25.237	34.975	0.721573	18.721	34.158	0.548071
49.483	33.875	1.46075	22.788	33.556	0.679104
39.912	33.875	1.17821	17.911	33.556	0.533764
31.579	32.996	0.957055	23.672	32.198	0.735201
30.26	32.996	0.917081	13.08	32.198	0.406236
Relative fluorescent intensity of O-GlcNAc staining.
OK107-Gal4>CpOGADM	OK107-Gal4>CpOGAWT
1.1371	0.832694
0.95847	0.833746
0.858442	0.527505
0.721573	0.548071
1.46075	0.679104
1.17821	0.533764
0.957055	0.735201
0.917081	0.406236
P value = 0.0015
P values were determined by unpaired t-test

## Sheet: F
Figure 1F
			Elav-Gal4		OK107-Gal4		c232-Gal4
	CpOGADM	CpOGAWT	CpOGADM	CpOGAWT	CpOGADM	CpOGAWT	CpOGADM	CpOGAWT
Performance index	44.3805	45.7415	57.2791	30.8784	51.7643	36.2183	62.7116	49.3939
	48.4096	41.3501	42.9229	23.3083	38.7097	28.6168	49.9777	47.1847
	40.5449	54.0306	67.278	38.1388	45.8158	27.7993	66.8192	55.3291
	53.9707	34.7207	64.6614	36.4954	48.9069	32.8028	53.3021	45.686
	52.9106	60.9016	40.9814	28.7092	43.7665	26.9161	51.1111	49.758
	48.3156	59.4152	66.4794	30.762	42.1592	28.8608	57.1913	46.0012
	57.3684	61.158	50.6365				46.5986
		60.9929
P value	0.5285		0.0005		<0.0001		0.0727
P values were determined by unpaired t-test

## Sheet: G
Figure 1G
	OK107-Gal4, Tub-Gal80ts
	CpOGADM	CpOGAWT
Performance index	51.9045	30
	58.0931	37.9493
	51.1933	42.1996
	64.1402	48.0549
	63.3428	32.1835
	56.8182	31.1355
P value	0.0002
P values were determined by unpaired t-test
