# Supplementary material for: Tissue-specific O-GlcNAcylation profiling identifies substrates in translational machinery in Drosophila mushroom body contributing to olfactory learning
Source: eLife journal article supplement (doi:10.7554/elife.91269), 2024-03-15
Supplement: fig1-figsupp1-data1 [file Figure 1-figure supplement 1-source data1.xlsx.xlsx]

## Sheet: A
	Elav-Gal4		OK107-Gal4		c232-Gal4		GMR33H10-Gal4		GMR14H04-Gal4		OK107-Gal4, Tub-Gal80ts
	CpOGADM	CpOGAWT	CpOGADM	CpOGAWT	CpOGADM	CpOGAWT	CpOGADM	CpOGAWT	CpOGADM	CpOGAWT	CpOGADM	CpOGAWT
Odor Acuity Performance index (MCH)	82.6087	72.9167	44.5545	59.4203	49.4253	47.619	44.6809	54.5455	50	23.0769	65.8537	63.2653
	75.5556	68	67.7419	67.0886	72.549	69.8925	40.2597	61.7978	28.8889	41.4634	76.5766	56
	56.0976	62.8866	80.2469	58.7629	75	47.0588	51.7241	34.0426	33.3333	39.3258	64.0449	58.8235
	51.8072	88.764	55.814	41.6667	51.0204	49.0566	37.8378	59.596	36.1702	42.2222	60.7843	57.1429
	74.026	67.5	60.4938	56.5217	50	41.9355	19.0476	50.7246	39.759	41.0526	61.3636	54.1667
	93.6508	81.0811	44	59.4595	67.4419	73.2143	39.1304	42.1053	59.1398	25	66.2338	68.4211
	87.3418	76.3158			70.8333	58.8235		46.2366	72.973	36.8421
						69.0476		58.3333	78.0822	33.3333
P value	0.9404		0.8084		0.4129		0.0472		0.0601		0.3412
P values were determined by unpaired t-test

## Sheet: B
	Elav-Gal4		OK107-Gal4		c232-Gal4		GMR33H10-Gal4		GMR14H04-Gal4		OK107-Gal4, Tub-Gal80ts
	CpOGADM	CpOGAWT	CpOGADM	CpOGAWT	CpOGADM	CpOGAWT	CpOGADM	CpOGAWT	CpOGADM	CpOGAWT	CpOGADM	CpOGAWT
Odor Acuity Performance index (OCT)	44.6809	26.8817	27.619	55.5556	60.8696	55.7895	18.4466	29.1139	48	20	57.1429	65.812
	34.2105	41.7722	51.9231	54.4554	57.5758	47.3684	2.04082	25.3012	55.5556	12.5	65.625	48
	52.9412	33.3333	61.3636	75.8242	32.6733	44.6809	18.2796	35.5556	45.6522	14.8936	58.0247	67.1233
	29.8969	32.5843	45.4545	76.7442	41.9355	42	19.1919	20.9302	31.3131	18.1818	60	56.0976
	34.0909	41.3793	58.2418	34.4538	47.9167	64.7059	23.0769	34.6939	31.3725	21.7391	65.8537	57.2816
	37.2093	48.8372	41.1765	55.1402	41.6667	33.3333	18.8679	25	59.322	22.7273	73.913	58.1395
	42.1053	34.9398			33.9806	32.0388		39.726	28.2051	24.4898
						36.1111		20	44.6154	21.7391
P value	0.5971		0.2066		0.9015		0.0095		<0.0001		0.5102
P values were determined by unpaired t-test
