# Supplementary material for: Tissue-specific O-GlcNAcylation profiling identifies substrates in translational machinery in Drosophila mushroom body contributing to olfactory learning
Source: eLife journal article supplement (doi:10.7554/elife.91269), 2024-03-15
Supplement: fig3-figsupp1-data1 [file Figure 3-figure supplement 1-source data1.xlsx.xlsx]

## Sheet: A
Gene Ontology (GO) enrichment analysis of O-GlcNAcylated protein candidates detected in the brain neurons
Category	Term	Count	%	PValue	Genes	List Total	Pop Hits	Pop Total	Fold Enrichment	Bonferroni	Benjamini	FDR
GOTERM_BP_DIRECT	GO:0006338~chromatin remodeling	18	4.27553	1.89672e-09	PONT, BAP170, WDS, HCF, NUP153, E(BX), NAP1, DSP1, MOR, BAP55, REPT, KIS, POLYBROMO, TOU, SNR1, JARID2, ISWI, HEL25E	410	76	10968	6.33582	2.72179e-06	2.7218e-06	2.62886e-06
GOTERM_BP_DIRECT	GO:0007269~neurotransmitter secretion	15	3.56295	5.67362e-08	SNAP24, BRP, ARF1, RAB3-GEF, CADPS, CASK, SYN, NSYB, ALPHASNAP, SYT7, UNC-13, HSC70-4, SYX1A, UNC-13-4A, VAP33	410	63	10968	6.36934	8.14131e-05	4.07082e-05	3.93182e-05
GOTERM_BP_DIRECT	GO:0007268~chemical synaptic transmission	17	4.038	3.85999e-07	BRP, EAAT1, KCC, ALPHASNAP, SHAB, CAMKII, ATPALPHA, DLG1, UNC-13, STNB, SHI, SAP47, DNC, GLUCLALPHA, PABP, LAP, CHC	410	95	10968	4.78706	0.000553755	0.00016635	0.00016067
GOTERM_BP_DIRECT	GO:0043044~ATP-dependent chromatin remodeling	9	2.13777	4.63695e-07	MOR, BAP55, KIS, POLYBROMO, CG4751, TOU, SNR1, ISWI, TRL	410	21	10968	11.4648	0.00066518	0.00016635	0.00016067
GOTERM_BP_DIRECT	GO:0048675~axon extension	9	2.13777	3.02024e-06	DCTN1-P150, NRG, LIPRIN-ALPHA, SH, CADN, DNC, DSH, ANK2, BSK	410	26	10968	9.26004	0.00432467	0.000682453	0.00065915
GOTERM_BP_DIRECT	GO:0006897~endocytosis	14	3.32542	3.43884e-06	RAB7, ARF1, EPS-15, AP-2ALPHA, REPS, STNB, SHI, GISH, PAST1, DAP160, AP-2MU, ENDOA, RHO1, CHC	410	75	10968	4.99356	0.00492259	0.000682453	0.00065915
GOTERM_BP_DIRECT	GO:0051028~mRNA transport	11	2.61283	3.70702e-06	NUP214, DCTN1-P150, NUP358, DLIC, FMR1, NUP50, NUP62, NUP153, NUP54, NUP98-96, NUP58	410	44	10968	6.6878	0.00530546	0.000682453	0.00065915
GOTERM_BP_DIRECT	GO:0048488~synaptic vesicle endocytosis	10	2.3753	3.80462e-06	ARF1, STNA, STNB, DAB, SHI, EPS-15, CASK, DAP160, AP-2ALPHA, ENDOA	410	35	10968	7.64321	0.00544476	0.000682453	0.00065915
GOTERM_BP_DIRECT	GO:0007409~axonogenesis	12	2.85036	9.43685e-06	NRG, DLIC, BETA-SPEC, FMR1, SCAR, KHC, VAV, LOLA, FUTSCH, SCM, FAX, MFAS	410	59	10968	5.44093	0.0134507	0.00150465	0.00145327
GOTERM_BP_DIRECT	GO:0008355~olfactory learning	10	2.3753	1.24848e-05	SGG, SHI, GAD1, GISH, FMR1, PKA-C1, DNC, SYN, FUTSCH, DRK	410	40	10968	6.6878	0.0177563	0.00179158	0.0017304
GOTERM_BP_DIRECT	GO:0006457~protein folding	14	3.32542	1.85154e-05	CCT3, CCT2, NUDC, CCT1, GP93, DROJ2, STIP1, HSC70-5, ZDA, CCT8, CCT7, CCT6, DNAJ-H, CCT4	410	87	10968	4.30479	0.02622	0.00238979	0.00230819
GOTERM_BP_DIRECT	GO:0030707~ovarian follicle cell development	13	3.08789	2.19493e-05	CCT1, PAR-1, AP-2ALPHA, ME31B, SGG, DLG1, HSC70-4, SHI, DSH, RPT4, UBA1, BSK, DRK	410	76	10968	4.57587	0.0310068	0.00238979	0.00230819
GOTERM_BP_DIRECT	GO:0045893~positive regulation of transcription, DNA-templated	18	4.27553	2.28468e-05	LOLAL, BAP170, HCF, BAP60, NSL1, E(BX), DREF, TRL, MOR, BAP55, CG5641, SIN3A, CG4751, LOLA, ARM, SNR1, JARID2, ISWI	410	143	10968	3.36729	0.0322539	0.00238979	0.00230819
GOTERM_BP_DIRECT	GO:0006606~protein import into nucleus	10	2.3753	2.3315e-05	NUP214, NUP358, KAP-ALPHA3, NUP107, NUP50, NUP62, NUP153, NUP54, MBO, NUP98-96	410	43	10968	6.22121	0.032904	0.00238979	0.00230819
GOTERM_BP_DIRECT	GO:0048790~maintenance of presynaptic active zone structure	6	1.42518	2.69933e-05	BRP, RHOGAP100F, BETA-SPEC, ALPHA-SPEC, DYB, DYS	410	11	10968	14.5916	0.0379953	0.00258236	0.00249418
GOTERM_BP_DIRECT	GO:0048489~synaptic vesicle transport	7	1.66271	3.28509e-05	DCTN1-P150, STNA, STNB, SHI, KHC, AP-2ALPHA, LAP	410	18	10968	10.4033	0.0460479	0.00294631	0.00284571
GOTERM_BP_DIRECT	GO:0007274~neuromuscular synaptic transmission	11	2.61283	4.18234e-05	RHOGAP92B, RBP, BRP, NWK, BETA-SPEC, WRD, SYX1A, CASK, ALPHA-SPEC, ALPHASNAP, DYS	410	57	10968	5.16252	0.0582523	0.00353039	0.00340984
GOTERM_BP_DIRECT	GO:0031507~heterochromatin assembly	12	2.85036	7.50637e-05	LOLAL, REPT, PC, DP1, HDAC1, AGO1, FMR1, LAM, SCM, SU(Z)2, ISWI, TRL	410	73	10968	4.39746	0.102121	0.00598424	0.0057799
GOTERM_BP_DIRECT	GO:0007349~cellularization	9	2.13777	9.39848e-05	DCTN1-P150, SEPTIN1, DAB, SEPTIN2, SHI, FMR1, PNUT, SYX1A, RHO1	410	40	10968	6.01902	0.126174	0.00709832	0.00685594
GOTERM_BP_DIRECT	GO:0016197~endosomal transport	8	1.90024	0.000175439	REPS, RAB7, VPS4, VHA68-2, EPS-15, PAST1, DAP160, STAM	410	33	10968	6.48514	0.222582	0.0125878	0.0121579
GOTERM_BP_DIRECT	GO:0072659~protein localization to plasma membrane	9	2.13777	0.000190089	SDT, SHI, BSG, FLO1, PAST1, SAR1, ARM, KRT95D, SEC24CD	410	44	10968	5.47184	0.238757	0.0129894	0.0125459
GOTERM_BP_DIRECT	GO:0007411~axon guidance	18	4.27553	0.000217289	PKA-R2, LIPRIN-ALPHA, HTS, FMR1, KHC, VAV, BDL, WB, KIS, HSC70-4, BETA-SPEC, BSG, CADN, FAS1, BSK, LOLA, FAS3, RHO1	410	171	10968	2.81592	0.267904	0.0136383	0.0131726
GOTERM_BP_DIRECT	GO:0016082~synaptic vesicle priming	6	1.42518	0.000218592	SNAP24, UNC-13, ALPHASNAP, SNAP29, UNC-13-4A, VAP33	410	16	10968	10.0317	0.269272	0.0136383	0.0131726
GOTERM_BP_DIRECT	GO:0098609~cell-cell adhesion	9	2.13777	0.0002622	NRG, DLG1, ALPHA-CAT, BSG, CADN, P120CTN, PYD, FAS3, ARM	410	46	10968	5.23393	0.313608	0.0156774	0.0151421
GOTERM_BP_DIRECT	GO:0030036~actin cytoskeleton organization	11	2.61283	0.000315582	SIF, VPS4, BETA-SPEC, SCAR, SN, ALPHA-SPEC, ZASP66, CHER, LARK, RHO1, DYS	410	72	10968	4.08699	0.364238	0.0181144	0.0174959
GOTERM_BP_DIRECT	GO:0016192~vesicle-mediated transport	16	3.80048	0.000381386	SNAP24, RAB7, ARF1, RAB3-GEF, CADPS, NSYB, PSGEF, SYT7, SLH, STNB, HSC70-4, SYX1A, RAB2, AP-2MU, SNAP29, CHC	410	147	10968	2.9117	0.421544	0.0210496	0.0203308
GOTERM_BP_DIRECT	GO:0007614~short-term memory	7	1.66271	0.000485669	BRP, KIS, SHI, FMR1, DNC, ANK2, DRK	410	28	10968	6.6878	0.501975	0.0258124	0.024931
GOTERM_BP_DIRECT	GO:0034613~cellular protein localization	6	1.42518	0.000685813	RHOGAP92B, SEPTIN1, SEPTIN2, PNUT, SEPTIN4, RHO1	410	20	10968	8.02537	0.626366	0.0351479	0.0339477
GOTERM_BP_DIRECT	GO:0034334~adherens junction maintenance	4	0.950119	0.000946498	PATJ, SHI, P120CTN, RHO1	410	6	10968	17.8341	0.743048	0.0468353	0.0452361
GOTERM_BP_DIRECT	GO:0008345~larval locomotory behavior	7	1.66271	0.00102982	SHAB, CALPA, SH, GAD1, FMR1, KHC, EAAT1	410	32	10968	5.85183	0.772031	0.04774	0.0461099
GOTERM_BP_DIRECT	GO:1902600~hydrogen ion transmembrane transport	9	2.13777	0.00103132	VHAAC39-1, VHA44, ATPALPHA, VHA55, VHA68-2, VHAAC45RP, ATPSYNB, UQCR-Q, VHA100-1	410	56	10968	4.2993	0.772523	0.04774	0.0461099
GOTERM_BP_DIRECT	GO:0008587~imaginal disc-derived wing margin morphogenesis	8	1.90024	0.00110546	MOR, BAP170, SGG, DSH, PAST1, LPIN, SNR1, ARM	410	44	10968	4.86386	0.795505	0.0495729	0.0478802
GOTERM_BP_DIRECT	GO:0000278~mitotic cell cycle	15	3.56295	0.00133644	DCTN1-P150, SF3A1, DLIC, MAP205, PPD3, ALPHATUB85E, ARP1, MTS, CHER, LARK, SMD2, AWD, BAP55, CCT6, EIF4G1	410	149	10968	2.69308	0.853257	0.056017	0.0541043
GOTERM_BP_DIRECT	GO:0016079~synaptic vesicle exocytosis	6	1.42518	0.00135729	UNC-13, CADPS, SYN, NSYB, SYT7, CHC	410	23	10968	6.97858	0.857589	0.056017	0.0541043
GOTERM_BP_DIRECT	GO:0072583~clathrin-dependent endocytosis	5	1.18765	0.00141617	DAB, SHI, AP-2ALPHA, LAP, AP-2MU	410	14	10968	9.55401	0.869142	0.056017	0.0541043
GOTERM_BP_DIRECT	GO:0035149~lumen formation, open tracheal system	7	1.66271	0.0014352	CCT3, DCTN1-P150, DLIC, VHA68-2, TAU, RHO1, SEC24CD	410	34	10968	5.5076	0.872671	0.056017	0.0541043
GOTERM_BP_DIRECT	GO:0019896~axonal transport of mitochondrion	4	0.950119	0.00161063	MILT, DCTN1-P150, MARF, ARP1	410	7	10968	15.2864	0.901047	0.056017	0.0541043
GOTERM_BP_DIRECT	GO:1990709~presynaptic active zone organization	4	0.950119	0.00161063	RBP, BRP, RHOGAP100F, LIPRIN-ALPHA	410	7	10968	15.2864	0.901047	0.056017	0.0541043
GOTERM_BP_DIRECT	GO:0048789~cytoskeletal matrix organization at active zone	4	0.950119	0.00161063	RBP, BRP, RAB3-GEF, RHOGAP100F	410	7	10968	15.2864	0.901047	0.056017	0.0541043
GOTERM_BP_DIRECT	GO:0061640~cytoskeleton-dependent cytokinesis	4	0.950119	0.00161063	SEPTIN1, SEPTIN2, PNUT, SEPTIN4	410	7	10968	15.2864	0.901047	0.056017	0.0541043
GOTERM_BP_DIRECT	GO:0031629~synaptic vesicle fusion to presynaptic active zone membrane	4	0.950119	0.00161063	SNAP24, SYX1A, ALPHASNAP, SNAP29	410	7	10968	15.2864	0.901047	0.056017	0.0541043
GOTERM_BP_DIRECT	GO:0007528~neuromuscular junction development	8	1.90024	0.00164832	CAMKII, UNC-13, GAD1, FMR1, WRD, ANK2, NSL1, VAP33	410	47	10968	4.5534	0.906266	0.056017	0.0541043
GOTERM_BP_DIRECT	GO:0045214~sarcomere organization	7	1.66271	0.00167856	BT, HTS, L(2)EFL, WUPA, BSG, SLS, CHER	410	35	10968	5.35024	0.910253	0.056017	0.0541043
GOTERM_BP_DIRECT	GO:0007616~long-term memory	10	2.3753	0.00181342	CAMKII, NEUR, HN, FMR1, ORB2, CASK, BSK, ARM, CHER, PKC98E	410	75	10968	3.56683	0.926069	0.0572406	0.055286
GOTERM_BP_DIRECT	GO:0045807~positive regulation of endocytosis	5	1.18765	0.00187478	NEUR, ARF1, FLO1, AP-2ALPHA, CHC	410	15	10968	8.91707	0.932311	0.0572406	0.055286
GOTERM_BP_DIRECT	GO:0006898~receptor-mediated endocytosis	5	1.18765	0.00187478	SHI, RLIP, AP-2ALPHA, LAP, CHC	410	15	10968	8.91707	0.932311	0.0572406	0.055286
GOTERM_BP_DIRECT	GO:0045467~R7 cell development	5	1.18765	0.00187478	RHOGAP100F, LIPRIN-ALPHA, CADN, BDL, LOLA	410	15	10968	8.91707	0.932311	0.0572406	0.055286
GOTERM_BP_DIRECT	GO:0048477~oogenesis	20	4.75059	0.00225887	DLIC, HDAC1, HTS, MTS, NSL1, TWIN, TRL, SGG, MIP120, PKA-C1, DSH, PAST1, PABP, RPS2, SN, TER94, ARM, CAPT, YPS, CTP	410	247	10968	2.16609	0.961037	0.067397	0.0650956
GOTERM_BP_DIRECT	GO:0007099~centriole replication	6	1.42518	0.00242019	PP2A-29B, RCD5, RCD1, CEP97, CCT6, MTS	410	26	10968	6.17336	0.969106	0.067397	0.0650956
GOTERM_BP_DIRECT	GO:0008306~associative learning	5	1.18765	0.00242684	SAP47, FMR1, DNC, SYN, DRK	410	16	10968	8.35976	0.9694	0.067397	0.0650956
GOTERM_BP_DIRECT	GO:0007413~axonal fasciculation	5	1.18765	0.00242684	HSC70-4, FMR1, SCAR, CADN, FAS3	410	16	10968	8.35976	0.9694	0.067397	0.0650956
GOTERM_BP_DIRECT	GO:0043161~proteasome-mediated ubiquitin-dependent protein catabolic process	12	2.85036	0.00244226	USP14, USP5, PROSALPHA1R, RPT6, RPN10, RPN1, RPT4, RPT2, TER94, RPT1, RPN8, RPN9	410	109	10968	2.94509	0.970071	0.067397	0.0650956
GOTERM_BP_DIRECT	GO:0008582~regulation of synaptic growth at neuromuscular junction	7	1.66271	0.00259849	CAMKII, NWK, METRO, KIS, EPS-15, CASK, FUTSCH	410	38	10968	4.92786	0.976095	0.0703552	0.0679529
GOTERM_BP_DIRECT	GO:0000398~mRNA splicing, via spliceosome	19	4.51306	0.00279304	PRP3, SF3A1, PS, ACN, U2AF38, MTR4, LARK, SMD2, RNP4F, FAND, ABS, HSC70-4, CG5641, U2AF50, CG4266, PABP, YPS, CRN, HEL25E	410	233	10968	2.18143	0.981932	0.0742224	0.071688
GOTERM_BP_DIRECT	GO:0001745~compound eye morphogenesis	12	2.85036	0.00302452	ARF1, CINDR, SCAR, DSH, P120CTN, LAM, PYD, VAV, ALPHASNAP, ARM, RHO1, DREF	410	112	10968	2.8662	0.987051	0.0789125	0.0762179
GOTERM_BP_DIRECT	GO:0046627~negative regulation of insulin receptor signaling pathway	6	1.42518	0.0039864	PP2A-29B, SGG, FMR1, PIP4K, WRD, MTS	410	29	10968	5.53474	0.996759	0.100423	0.0969937
GOTERM_BP_DIRECT	GO:0016185~synaptic vesicle budding from presynaptic endocytic zone membrane	3	0.712589	0.0040589	SHI, LAP, DRP1	410	3	10968	26.7512	0.997081	0.100423	0.0969937
GOTERM_BP_DIRECT	GO:0097479~synaptic vesicle localization	3	0.712589	0.0040589	RHOGAP100F, LIPRIN-ALPHA, WRD	410	3	10968	26.7512	0.997081	0.100423	0.0969937
GOTERM_BP_DIRECT	GO:0032956~regulation of actin cytoskeleton organization	5	1.18765	0.00473058	RHOGAP92B, SHI, RAC2, P120CTN, RHO1	410	19	10968	7.03979	0.998891	0.11314	0.109276
GOTERM_BP_DIRECT	GO:0051017~actin filament bundle assembly	5	1.18765	0.00473058	IRSP53, RAC2, SN, RHO1, CTP	410	19	10968	7.03979	0.998891	0.11314	0.109276
GOTERM_BP_DIRECT	GO:0016322~neuron remodeling	7	1.66271	0.00490766	CALPA, PC, VPS4, KIS, FMR1, UBA1, STAM	410	43	10968	4.35485	0.999141	0.113589	0.10971
GOTERM_BP_DIRECT	GO:0035331~negative regulation of hippo signaling	7	1.66271	0.00490766	PP2A-29B, USP7, PAR-1, RAP1, SLMAP, MTS, STRN-MLCK	410	43	10968	4.35485	0.999141	0.113589	0.10971
GOTERM_BP_DIRECT	GO:0016334~establishment or maintenance of polarity of follicular epithelium	4	0.950119	0.0050788	DLG1, PATJ, SDS22, AWD	410	10	10968	10.7005	0.999329	0.114434	0.110526
GOTERM_BP_DIRECT	GO:0045892~negative regulation of transcription, DNA-templated	13	3.08789	0.00511359	LOLAL, HDAC1, PH-D, E(BX), TRL, DSP1, PC, KIS, SIN3A, PDCD4, SCM, PZG, ISWI	410	137	10968	2.53844	0.999362	0.114434	0.110526
GOTERM_BP_DIRECT	GO:0008104~protein localization	9	2.13777	0.0051834	NEUR, RHOGAP92B, DLG1, IST1, DAP160, AP-2ALPHA, CHER, LARK, RHO1	410	72	10968	3.3439	0.999423	0.114434	0.110526
GOTERM_BP_DIRECT	GO:0007391~dorsal closure	11	2.61283	0.00535213	DLG1, DAB, NMT, RAP1, DSH, RAC2, PYD, VAV, BSK, ARM, RHO1	410	104	10968	2.82946	0.999548	0.116368	0.112395
GOTERM_BP_DIRECT	GO:0007266~Rho protein signal transduction	5	1.18765	0.00574177	RHOGAPP190, RHOGAP19D, ARU, RHOGAP100F, RAC2	410	20	10968	6.6878	0.999742	0.121168	0.117031
GOTERM_BP_DIRECT	GO:0007029~endoplasmic reticulum organization	5	1.18765	0.00574177	SAR1, RTNL1, MARF, TER94, SEC24CD	410	20	10968	6.6878	0.999742	0.121168	0.117031
GOTERM_BP_DIRECT	GO:0000226~microtubule cytoskeleton organization	8	1.90024	0.00610275	DLIC, PAR-1, TAU, ALPHATUB85E, ANK2, FUTSCH, TER94, MTS	410	59	10968	3.62728	0.999847	0.126469	0.122151
GOTERM_BP_DIRECT	GO:0042026~protein refolding	6	1.42518	0.00616923	HSC70-4, HSC70-5, L(2)EFL, HSP23, DNAJ-H, DROJ2	410	32	10968	5.01585	0.999861	0.126469	0.122151
GOTERM_BP_DIRECT	GO:0006607~NLS-bearing protein import into nucleus	4	0.950119	0.00679195	NUP358, KAP-ALPHA3, NUP153, NUP54	410	11	10968	9.72772	0.999943	0.134991	0.130381
GOTERM_BP_DIRECT	GO:0030727~germarium-derived female germ-line cyst formation	4	0.950119	0.00679195	AGO1, PDCD4, ALPHA-SPEC, NSL1	410	11	10968	9.72772	0.999943	0.134991	0.130381
GOTERM_BP_DIRECT	GO:0017148~negative regulation of translation	7	1.66271	0.00686713	4E-T, ME31B, AGO1, FMR1, ORB2, LARP4B, TWIN	410	46	10968	4.07084	0.999949	0.134991	0.130381
GOTERM_BP_DIRECT	GO:0008344~adult locomotory behavior	8	1.90024	0.0080002	BRP, ATPALPHA, FMR1, EAAT1, LAM, CASK, NINAE, MARF	410	62	10968	3.45177	0.99999	0.152343	0.147141
GOTERM_BP_DIRECT	GO:0008049~male courtship behavior	8	1.90024	0.0080002	CAMKII, NRG, DLG1, KTL, FMR1, ORB2, CASK, SYN	410	62	10968	3.45177	0.99999	0.152343	0.147141
GOTERM_BP_DIRECT	GO:0007317~regulation of pole plasm oskar mRNA localization	5	1.18765	0.00817452	PAR-1, KHC, PKA-C1, SYX1A, TER94	410	22	10968	6.07982	0.999992	0.152343	0.147141
GOTERM_BP_DIRECT	GO:0006906~vesicle fusion	5	1.18765	0.00817452	SNAP24, SYX1A, NSYB, PSGEF, SNAP29	410	22	10968	6.07982	0.999992	0.152343	0.147141
GOTERM_BP_DIRECT	GO:0045475~locomotor rhythm	8	1.90024	0.00872001	GW, SGG, DLG1, PKA-R2, E, FMR1, LARK, SXC	410	63	10968	3.39698	0.999997	0.157998	0.152603
GOTERM_BP_DIRECT	GO:0008594~photoreceptor cell morphogenesis	4	0.950119	0.00880823	PATJ, LIPRIN-ALPHA, BSG, NINAE	410	12	10968	8.91707	0.999997	0.157998	0.152603
GOTERM_BP_DIRECT	GO:0046959~habituation	4	0.950119	0.00880823	ME31B, SGG, AGO1, FMR1	410	12	10968	8.91707	0.999997	0.157998	0.152603
GOTERM_BP_DIRECT	GO:0050770~regulation of axonogenesis	5	1.18765	0.00960972	SIF, RHOGAPP190, DSH, RAC2, RHO1	410	23	10968	5.81548	0.999999	0.170246	0.164433
GOTERM_BP_DIRECT	GO:0051124~synaptic growth at neuromuscular junction	6	1.42518	0.0102284	SGG, DLG1, ATPALPHA, PAR-1, LIPRIN-ALPHA, SYN	410	36	10968	4.45854	1	0.178996	0.172884
GOTERM_BP_DIRECT	GO:0007615~anesthesia-resistant memory	4	0.950119	0.0111381	BRP, PKA-C1, DNC, CASK	410	13	10968	8.23114	1	0.190276	0.183779
GOTERM_BP_DIRECT	GO:0006405~RNA export from nucleus	4	0.950119	0.0111381	NUP214, NUP62, NUP153, NUP98-96	410	13	10968	8.23114	1	0.190276	0.183779
GOTERM_BP_DIRECT	GO:0000902~cell morphogenesis	7	1.66271	0.0123881	SCAR, RAC2, SAR1, ARM, CAPT, SLH, SEC24CD	410	52	10968	3.60113	1	0.20436	0.197382
GOTERM_BP_DIRECT	GO:0046833~positive regulation of RNA export from nucleus	3	0.712589	0.0128715	NUP214, NUP358, U2AF50	410	5	10968	16.0507	1	0.20436	0.197382
GOTERM_BP_DIRECT	GO:1900182~positive regulation of protein localization to nucleus	3	0.712589	0.0128715	NUP358, NUP107, LAM	410	5	10968	16.0507	1	0.20436	0.197382
GOTERM_BP_DIRECT	GO:2000601~positive regulation of Arp2/3 complex-mediated actin nucleation	3	0.712589	0.0128715	NWK, NAUS, SCAR	410	5	10968	16.0507	1	0.20436	0.197382
GOTERM_BP_DIRECT	GO:0034333~adherens junction assembly	3	0.712589	0.0128715	CINDR, ALPHA-CAT, RAP1	410	5	10968	16.0507	1	0.20436	0.197382
GOTERM_BP_DIRECT	GO:0045727~positive regulation of translation	5	1.18765	0.0129484	DP1, FMR1, ORB2, PABP, LARP4B	410	25	10968	5.35024	1	0.20436	0.197382
GOTERM_BP_DIRECT	GO:0002181~cytoplasmic translation	10	2.3753	0.0129594	RPS26, RPL18A, RPS10B, RPL11, RPLP0, RPL14, RPS5A, RPS2, RPL8, RPS12	410	101	10968	2.64864	1	0.20436	0.197382
GOTERM_BP_DIRECT	GO:0030100~regulation of endocytosis	4	0.950119	0.0137895	STNB, AP-2ALPHA, SNAP29, NSL1	410	14	10968	7.64321	1	0.212774	0.205508
GOTERM_BP_DIRECT	GO:0030239~myofibril assembly	4	0.950119	0.0137895	WUPA, TMOD, PRM, ZASP66	410	14	10968	7.64321	1	0.212774	0.205508
GOTERM_BP_DIRECT	GO:0007613~memory	5	1.18765	0.0148626	ARU, SHI, DNC, SYN, CRMP	410	26	10968	5.14447	1	0.226892	0.219144
GOTERM_BP_DIRECT	GO:0009612~response to mechanical stimulus	4	0.950119	0.0167682	ATPALPHA, GAD1, GISH, KCC	410	15	10968	7.13366	1	0.248144	0.239671
GOTERM_BP_DIRECT	GO:1901215~negative regulation of neuron death	4	0.950119	0.0167682	TAU, PABP, FUTSCH, DREP2	410	15	10968	7.13366	1	0.248144	0.239671
GOTERM_BP_DIRECT	GO:0072499~photoreceptor cell axon guidance	5	1.18765	0.0169464	NRG, BETA-SPEC, HTS, VAV, CAPT	410	27	10968	4.95393	1	0.248144	0.239671
GOTERM_BP_DIRECT	GO:0007294~germarium-derived oocyte fate determination	5	1.18765	0.0169464	PAR-1, AGO1, FMR1, HTS, ALPHA-SPEC	410	27	10968	4.95393	1	0.248144	0.239671
GOTERM_BP_DIRECT	GO:0007623~circadian rhythm	6	1.42518	0.017481	SGG, PKA-R2, E, FMR1, DNC, LARK	410	41	10968	3.91481	1	0.250853	0.242287
GOTERM_BP_DIRECT	GO:0008360~regulation of cell shape	6	1.42518	0.017481	SCAR, RAC2, ALPHA-SPEC, CAPT, RHO1, SEC24CD	410	41	10968	3.91481	1	0.250853	0.242287
GOTERM_BP_DIRECT	GO:0007399~nervous system development	10	2.3753	0.0183382	NEUR, BAP55, DLG1, HSC70-4, BETA-SPEC, DOA, WUPA, TOU, ELAV, ARM	410	107	10968	2.50011	1	0.25138	0.242796
GOTERM_BP_DIRECT	GO:0007298~border follicle cell migration	10	2.3753	0.0183382	MIM, RAB7, PAR-1, CINDR, SHI, RAP1, DSH, CASK, VAV, RHO1	410	107	10968	2.50011	1	0.25138	0.242796
GOTERM_BP_DIRECT	GO:0007015~actin filament organization	8	1.90024	0.0187393	CAP, CINDR, SCAR, RAC2, TMOD, SN, CAPT, RHO1	410	73	10968	2.93164	1	0.25138	0.242796
GOTERM_BP_DIRECT	GO:0046822~regulation of nucleocytoplasmic transport	3	0.712589	0.0188339	RANGAP, NUP107, NUP98-96	410	6	10968	13.3756	1	0.25138	0.242796
GOTERM_BP_DIRECT	GO:0007043~cell-cell junction assembly	3	0.712589	0.0188339	PATJ, SDT, P120CTN	410	6	10968	13.3756	1	0.25138	0.242796
GOTERM_BP_DIRECT	GO:0046578~regulation of Ras protein signal transduction	3	0.712589	0.0188339	RHOGAP100F, RLIP, UBA1	410	6	10968	13.3756	1	0.25138	0.242796
GOTERM_BP_DIRECT	GO:0019933~cAMP-mediated signaling	3	0.712589	0.0188339	PKA-C1, DNC, CAPT	410	6	10968	13.3756	1	0.25138	0.242796
GOTERM_BP_DIRECT	GO:0048149~behavioral response to ethanol	7	1.66271	0.0189192	DLG1, PKA-R2, HOMER, DNC, CASK, SYN, CHER	410	57	10968	3.28524	1	0.25138	0.242796
GOTERM_BP_DIRECT	GO:0010628~positive regulation of gene expression	8	1.90024	0.0200577	DIF, PONT, NUP358, PKA-C1, BSK, BAP60, NUP98-96, DREF	410	74	10968	2.89202	1	0.259564	0.250701
GOTERM_BP_DIRECT	GO:1990573~potassium ion import across plasma membrane	4	0.950119	0.0200778	ATPALPHA, NRV3, KCC, NRV1	410	16	10968	6.6878	1	0.259564	0.250701
GOTERM_BP_DIRECT	GO:0030838~positive regulation of actin filament polymerization	4	0.950119	0.0200778	SHI, IRSP53, LAM, NUP98-96	410	16	10968	6.6878	1	0.259564	0.250701
GOTERM_BP_DIRECT	GO:0045879~negative regulation of smoothened signaling pathway	7	1.66271	0.0204616	PP2A-29B, SGG, HDAC1, PKA-C1, PP1ALPHA-96A, TER94, MTS	410	58	10968	3.2286	1	0.262164	0.253212
GOTERM_BP_DIRECT	GO:0035159~regulation of tube length, open tracheal system	5	1.18765	0.0216387	ATPALPHA, DSH, VARI, RHO1, CHC	410	29	10968	4.61228	1	0.274792	0.265409
GOTERM_BP_DIRECT	GO:0016477~cell migration	7	1.66271	0.0220871	RHOGAP100F, LANB1, ALPHA-CAT, DSH, VAV, SN, RHO1	410	59	10968	3.17387	1	0.278026	0.268533
GOTERM_BP_DIRECT	GO:0035186~syncytial blastoderm mitotic cell cycle	4	0.950119	0.0237199	PC, SHI, PH-D, TRL	410	17	10968	6.2944	1	0.289402	0.27952
GOTERM_BP_DIRECT	GO:0048812~neuron projection morphogenesis	4	0.950119	0.0237199	FMR1, BSK, SN, RHO1	410	17	10968	6.2944	1	0.289402	0.27952
GOTERM_BP_DIRECT	GO:0008088~axo-dendritic transport	4	0.950119	0.0237199	DLIC, KHC, FUTSCH, VAP33	410	17	10968	6.2944	1	0.289402	0.27952
GOTERM_BP_DIRECT	GO:0007601~visual perception	7	1.66271	0.0237975	SIF, RAP1, FMR1, DOA, CHP, NINAE, RHO1	410	60	10968	3.12098	1	0.289402	0.27952
GOTERM_BP_DIRECT	GO:0007156~homophilic cell adhesion via plasma membrane adhesion molecules	6	1.42518	0.02527	BSG, CADN, FAS1, CHP, BDL, FAS3	410	45	10968	3.56683	1	0.297685	0.28752
GOTERM_BP_DIRECT	GO:0007291~sperm individualization	7	1.66271	0.0255945	EIF3M, SHI, GISH, ORB2, PAST1, CTP, CHC	410	61	10968	3.06981	1	0.297685	0.28752
GOTERM_BP_DIRECT	GO:0048172~regulation of short-term neuronal synaptic plasticity	3	0.712589	0.0257233	SAP47, SHI, DYS	410	7	10968	11.4648	1	0.297685	0.28752
GOTERM_BP_DIRECT	GO:0048846~axon extension involved in axon guidance	3	0.712589	0.0257233	RHOGAP100F, SCAR, CADN	410	7	10968	11.4648	1	0.297685	0.28752
GOTERM_BP_DIRECT	GO:0008154~actin polymerization or depolymerization	3	0.712589	0.0257233	GEK, CAPT, GEL	410	7	10968	11.4648	1	0.297685	0.28752
GOTERM_BP_DIRECT	GO:0051646~mitochondrion localization	3	0.712589	0.0257233	BSG, MARF, DRP1	410	7	10968	11.4648	1	0.297685	0.28752
GOTERM_BP_DIRECT	GO:0061024~membrane organization	4	0.950119	0.0276946	NWK, IRSP53, SAR1, ENDOB	410	18	10968	5.94472	1	0.317934	0.307078
GOTERM_BP_DIRECT	GO:0046716~muscle cell cellular homeostasis	5	1.18765	0.0300353	GYF, WUPA, TER94, CAPT, DYS	410	32	10968	4.17988	1	0.336724	0.325226
GOTERM_BP_DIRECT	GO:0010508~positive regulation of autophagy	5	1.18765	0.0300353	SHI, DOA, AP-2ALPHA, BSK, CHC	410	32	10968	4.17988	1	0.336724	0.325226
GOTERM_BP_DIRECT	GO:0007520~myoblast fusion	5	1.18765	0.0300353	CALPA, SCAR, RAC2, VAV, SLS	410	32	10968	4.17988	1	0.336724	0.325226
GOTERM_BP_DIRECT	GO:0007476~imaginal disc-derived wing morphogenesis	11	2.61283	0.0307798	NEUR, ARF1, KIS, SEPTIN1, CG, LANB1, PKA-C1, PNUT, DRK, CTP, TRL	410	136	10968	2.1637	1	0.342396	0.330704
GOTERM_BP_DIRECT	GO:0008103~oocyte microtubule cytoskeleton polarization	4	0.950119	0.0320004	KHC, PKA-C1, CAPT, CHC	410	19	10968	5.63184	1	0.34796	0.336079
GOTERM_BP_DIRECT	GO:0006402~mRNA catabolic process	4	0.950119	0.0320004	GW, AGO1, TWIN, EDC3	410	19	10968	5.63184	1	0.34796	0.336079
GOTERM_BP_DIRECT	GO:0030198~extracellular matrix organization	5	1.18765	0.0332053	LANB1, SHI, FAS1, CHC, MFAS	410	33	10968	4.05322	1	0.34796	0.336079
GOTERM_BP_DIRECT	GO:0006207~'de novo' pyrimidine nucleobase biosynthetic process	3	0.712589	0.0334624	AK1, CMPK, CRMP	410	8	10968	10.0317	1	0.34796	0.336079
GOTERM_BP_DIRECT	GO:0031623~receptor internalization	3	0.712589	0.0334624	SHI, AP-2ALPHA, CHC	410	8	10968	10.0317	1	0.34796	0.336079
GOTERM_BP_DIRECT	GO:0036376~sodium ion export from cell	3	0.712589	0.0334624	ATPALPHA, NRV3, NRV1	410	8	10968	10.0317	1	0.34796	0.336079
GOTERM_BP_DIRECT	GO:0006883~cellular sodium ion homeostasis	3	0.712589	0.0334624	ATPALPHA, NRV3, NRV1	410	8	10968	10.0317	1	0.34796	0.336079
GOTERM_BP_DIRECT	GO:0030007~cellular potassium ion homeostasis	3	0.712589	0.0334624	ATPALPHA, NRV3, NRV1	410	8	10968	10.0317	1	0.34796	0.336079
GOTERM_BP_DIRECT	GO:0045899~positive regulation of RNA polymerase II transcriptional preinitiation complex assembly	3	0.712589	0.0334624	RPT6, RPT4, RPT1	410	8	10968	10.0317	1	0.34796	0.336079
GOTERM_BP_DIRECT	GO:0009408~response to heat	7	1.66271	0.0359292	L(2)EFL, HCS, SYN, PGAM5, BSK, HSP23, DROJ2	410	66	10968	2.83725	1	0.370924	0.358258
GOTERM_BP_DIRECT	GO:0035099~hemocyte migration	4	0.950119	0.0366342	RAP1, RAC2, SN, RHO1	410	20	10968	5.35024	1	0.375501	0.362679
GOTERM_BP_DIRECT	GO:0009306~protein secretion	6	1.42518	0.0377351	DELTACOP, EIF3M, DOA, RAB2, SAR1, SEC24CD	410	50	10968	3.21015	1	0.381337	0.368316
GOTERM_BP_DIRECT	GO:0043547~positive regulation of GTPase activity	6	1.42518	0.0377351	RHOGAP92B, RANGAP, GBETA5, RSG7, RLIP, RHOGAP1A	410	50	10968	3.21015	1	0.381337	0.368316
GOTERM_BP_DIRECT	GO:0008380~RNA splicing	5	1.18765	0.0401095	FAND, U2AF50, U2AF38, ACN, SMD2	410	35	10968	3.8216	1	0.401595	0.387882
GOTERM_BP_DIRECT	GO:0097352~autophagosome maturation	4	0.950119	0.041592	VPS4, TER94, SNAP29, VHA100-1	410	21	10968	5.09547	1	0.401595	0.387882
GOTERM_BP_DIRECT	GO:0007406~negative regulation of neuroblast proliferation	4	0.950119	0.041592	MOR, BAP60, SNR1, MTS	410	21	10968	5.09547	1	0.401595	0.387882
GOTERM_BP_DIRECT	GO:0016081~synaptic vesicle docking	4	0.950119	0.041592	UNC-13, SYX1A, CASK, NSYB	410	21	10968	5.09547	1	0.401595	0.387882
GOTERM_BP_DIRECT	GO:0007097~nuclear migration	4	0.950119	0.041592	DCTN1-P150, NUDC, KHC, LAM	410	21	10968	5.09547	1	0.401595	0.387882
GOTERM_BP_DIRECT	GO:0008366~axon ensheathment	3	0.712589	0.0419786	NRG, BDL, CRN	410	9	10968	8.91707	1	0.401595	0.387882
GOTERM_BP_DIRECT	GO:0061025~membrane fusion	3	0.712589	0.0419786	SNAP24, SHI, DRP1	410	9	10968	8.91707	1	0.401595	0.387882
GOTERM_BP_DIRECT	GO:0046667~compound eye retinal cell programmed cell death	3	0.712589	0.0419786	SHI, ARM, CHC	410	9	10968	8.91707	1	0.401595	0.387882
GOTERM_BP_DIRECT	GO:0000381~regulation of alternative mRNA splicing, via spliceosome	8	1.90024	0.0434039	FAND, SF3A1, PS, U2AF50, DOA, U2AF38, CRN, HEL25E	410	87	10968	2.45988	1	0.412481	0.398396
GOTERM_BP_DIRECT	GO:0000132~establishment of mitotic spindle orientation	4	0.950119	0.0468685	DCTN1-P150, DLG1, DSH, CTP	410	22	10968	4.86386	1	0.439583	0.424573
GOTERM_BP_DIRECT	GO:0016458~gene silencing	4	0.950119	0.0468685	LOLAL, PC, HDAC1, SCM	410	22	10968	4.86386	1	0.439583	0.424573
GOTERM_BP_DIRECT	GO:0042052~rhabdomere development	5	1.18765	0.0477684	DCTN1-P150, PROM, CHP, NINAE, CAPT	410	37	10968	3.61503	1	0.445114	0.429915
GOTERM_BP_DIRECT	GO:0034332~adherens junction organization	3	0.712589	0.0512036	PATJ, ALPHA-CAT, AWD	410	10	10968	8.02537	1	0.46212	0.446341
GOTERM_BP_DIRECT	GO:0035076~ecdysone receptor-mediated signaling pathway	3	0.712589	0.0512036	PZG, ISWI, E(BX)	410	10	10968	8.02537	1	0.46212	0.446341
GOTERM_BP_DIRECT	GO:0046034~ATP metabolic process	3	0.712589	0.0512036	VHA55, VHA68-2, AK1	410	10	10968	8.02537	1	0.46212	0.446341
GOTERM_BP_DIRECT	GO:0090328~regulation of olfactory learning	3	0.712589	0.0512036	ME31B, AGO1, FMR1	410	10	10968	8.02537	1	0.46212	0.446341
GOTERM_BP_DIRECT	GO:0046847~filopodium assembly	3	0.712589	0.0512036	MIM, IRSP53, SN	410	10	10968	8.02537	1	0.46212	0.446341
GOTERM_BP_DIRECT	GO:0006099~tricarboxylic acid cycle	5	1.18765	0.0518801	SCSBETAG, MDH1, IDH, IRP-1B, SDHB	410	38	10968	3.5199	1	0.464668	0.448801
GOTERM_BP_DIRECT	GO:0050803~regulation of synapse structure or activity	4	0.950119	0.0524573	SIF, ARU, SHI, ENDOA	410	23	10968	4.65239	1	0.464668	0.448801
GOTERM_BP_DIRECT	GO:0010883~regulation of lipid storage	4	0.950119	0.0524573	DELTACOP, ARF1, LSD-1, RAC2	410	23	10968	4.65239	1	0.464668	0.448801
GOTERM_BP_DIRECT	GO:0010468~regulation of gene expression	9	2.13777	0.0553569	PS, KIS, LOLA, LIG, PZG, YPS, CP190, E(BX), SXC	410	111	10968	2.16902	1	0.487345	0.470704
GOTERM_BP_DIRECT	GO:0048190~wing disc dorsal/ventral pattern formation	6	1.42518	0.0569206	MPCP2, RAB7, ANXB9, CAPT, MTS, SLH	410	56	10968	2.8662	1	0.498055	0.481048
GOTERM_BP_DIRECT	GO:0035317~imaginal disc-derived wing hair organization	4	0.950119	0.0583513	RAP1, DSH, SN, RHO1	410	24	10968	4.45854	1	0.50748	0.490151
GOTERM_BP_DIRECT	GO:0006342~chromatin silencing	7	1.66271	0.0605376	LOLAL, REPT, USP7, HDAC1, AGO1, LAM, SU(Z)2	410	75	10968	2.49678	1	0.512512	0.495011
GOTERM_BP_DIRECT	GO:0007507~heart development	5	1.18765	0.0606633	SGG, KIS, WDS, WUPA, ARM	410	40	10968	3.3439	1	0.512512	0.495011
GOTERM_BP_DIRECT	GO:0035158~regulation of tube diameter, open tracheal system	3	0.712589	0.0610728	DELTACOP, ATPALPHA, SEC24CD	410	11	10968	7.29579	1	0.512512	0.495011
GOTERM_BP_DIRECT	GO:0007622~rhythmic behavior	3	0.712589	0.0610728	SGG, PKA-R2, PKA-C1	410	11	10968	7.29579	1	0.512512	0.495011
GOTERM_BP_DIRECT	GO:0006913~nucleocytoplasmic transport	3	0.712589	0.0610728	RANGAP, NUP54, NUP58	410	11	10968	7.29579	1	0.512512	0.495011
GOTERM_BP_DIRECT	GO:0034728~nucleosome organization	3	0.712589	0.0610728	ISWI, E(BX), TRL	410	11	10968	7.29579	1	0.512512	0.495011
GOTERM_BP_DIRECT	GO:0046718~viral entry into host cell	4	0.950119	0.0645426	RAB7, VPS4, SHI, RAB2	410	25	10968	4.2802	1	0.538481	0.520094
GOTERM_BP_DIRECT	GO:0048749~compound eye development	9	2.13777	0.0654228	NEUR, ARF1, CINDR, DOA, SCM, CAPT, VHA100-1, DREF, CHC	410	115	10968	2.09357	1	0.53955	0.521126
GOTERM_BP_DIRECT	GO:0048813~dendrite morphogenesis	9	2.13777	0.0654228	NRG, DLIC, FMR1, KHC, LOLA, FUTSCH, TER94, RHO1, DREF	410	115	10968	2.09357	1	0.53955	0.521126
GOTERM_BP_DIRECT	GO:0051489~regulation of filopodium assembly	3	0.712589	0.0715257	CAMKII, SCAR, RHO1	410	12	10968	6.6878	1	0.550119	0.531335
GOTERM_BP_DIRECT	GO:0042407~cristae formation	3	0.712589	0.0715257	AFG3L2, MIC26-27, QIL1	410	12	10968	6.6878	1	0.550119	0.531335
GOTERM_BP_DIRECT	GO:0034389~lipid particle organization	3	0.712589	0.0715257	LSD-1, MARF, PKC98E	410	12	10968	6.6878	1	0.550119	0.531335
GOTERM_BP_DIRECT	GO:1900073~regulation of neuromuscular synaptic transmission	3	0.712589	0.0715257	FMR1, CASK, PLC21C	410	12	10968	6.6878	1	0.550119	0.531335
GOTERM_BP_DIRECT	GO:0007035~vacuolar acidification	3	0.712589	0.0715257	VHAAC39-1, VHA55, VHA100-1	410	12	10968	6.6878	1	0.550119	0.531335
GOTERM_BP_DIRECT	GO:0045471~response to ethanol	3	0.712589	0.0715257	ARU, HOMER, PKC98E	410	12	10968	6.6878	1	0.550119	0.531335
GOTERM_BP_DIRECT	GO:0051260~protein homooligomerization	3	0.712589	0.0715257	SHAB, KTL, SH	410	12	10968	6.6878	1	0.550119	0.531335
GOTERM_BP_DIRECT	GO:0031290~retinal ganglion cell axon guidance	3	0.712589	0.0715257	LIPRIN-ALPHA, CADN, DSH	410	12	10968	6.6878	1	0.550119	0.531335
GOTERM_BP_DIRECT	GO:0045463~R8 cell development	3	0.712589	0.0715257	VPS4, CADN, PYD	410	12	10968	6.6878	1	0.550119	0.531335
GOTERM_BP_DIRECT	GO:0006886~intracellular protein transport	10	2.3753	0.0729282	DCTN1-P150, ARF1, SYX1A, AP-2ALPHA, AP-2MU, SAR1, ALPHASNAP, SLH, SEC24CD, CHC	410	138	10968	1.93849	1	0.550119	0.531335
GOTERM_BP_DIRECT	GO:0099578~regulation of translation at postsynapse, modulating synaptic transmission	2	0.475059	0.0731933	FMR1, EIF4E1	410	2	10968	26.7512	1	0.550119	0.531335
GOTERM_BP_DIRECT	GO:0009584~detection of visible light	2	0.475059	0.0731933	SH, NINAE	410	2	10968	26.7512	1	0.550119	0.531335
GOTERM_BP_DIRECT	GO:2000251~positive regulation of actin cytoskeleton reorganization	2	0.475059	0.0731933	IRSP53, VAV	410	2	10968	26.7512	1	0.550119	0.531335
GOTERM_BP_DIRECT	GO:0046826~negative regulation of protein export from nucleus	2	0.475059	0.0731933	NUP214, MBO	410	2	10968	26.7512	1	0.550119	0.531335
GOTERM_BP_DIRECT	GO:0042062~long-term strengthening of neuromuscular junction	2	0.475059	0.0731933	BETA-SPEC, ALPHA-SPEC	410	2	10968	26.7512	1	0.550119	0.531335
GOTERM_BP_DIRECT	GO:1990547~mitochondrial phosphate ion transmembrane transport	2	0.475059	0.0731933	MPCP2, MPCP1	410	2	10968	26.7512	1	0.550119	0.531335
GOTERM_BP_DIRECT	GO:0006468~protein phosphorylation	13	3.08789	0.0732214	CAMKI, PAR-1, CASK, AWD, DREF, CAMKII, SGG, GISH, PKA-C1, BMA, DOA, PKC98E, STRN-MLCK	410	201	10968	1.73018	1	0.550119	0.531335
GOTERM_BP_DIRECT	GO:0006914~autophagy	6	1.42518	0.0807866	PP2A-29B, ZDA, WRD, UBA1, MTS, CTP	410	62	10968	2.58883	1	0.597571	0.577166
GOTERM_BP_DIRECT	GO:0007498~mesoderm development	6	1.42518	0.0807866	NEUR, BT, MLC1, PRM, ZASP66, SLS	410	62	10968	2.58883	1	0.597571	0.577166
GOTERM_BP_DIRECT	GO:0016573~histone acetylation	6	1.42518	0.0807866	PONT, BAP55, REPT, WDS, TAF6, HCF	410	62	10968	2.58883	1	0.597571	0.577166
GOTERM_BP_DIRECT	GO:0050807~regulation of synapse organization	3	0.712589	0.0825053	BETA-SPEC, FMR1, ALPHA-SPEC	410	13	10968	6.17336	1	0.600991	0.580469
GOTERM_BP_DIRECT	GO:0007303~cytoplasmic transport, nurse cell to oocyte	3	0.712589	0.0825053	KHC, CHER, LARK	410	13	10968	6.17336	1	0.600991	0.580469
GOTERM_BP_DIRECT	GO:0001738~morphogenesis of a polarized epithelium	3	0.712589	0.0825053	DLG1, SDT, SHI	410	13	10968	6.17336	1	0.600991	0.580469
GOTERM_BP_DIRECT	GO:0007430~terminal branching, open tracheal system	4	0.950119	0.0848116	CCT3, VHAAC39-1, LAM, VHA100-1	410	28	10968	3.8216	1	0.61467	0.593681
GOTERM_BP_DIRECT	GO:0032436~positive regulation of proteasomal ubiquitin-dependent protein catabolic process	5	1.18765	0.0857983	SGG, USP5, WDS, PKA-C1, TER94	410	45	10968	2.97236	1	0.618697	0.59757
GOTERM_BP_DIRECT	GO:0042060~wound healing	6	1.42518	0.0897619	PC, PPO1, BSK, SN, STAM, RHO1	410	64	10968	2.50793	1	0.644042	0.62205
GOTERM_BP_DIRECT	GO:0000281~mitotic cytokinesis	5	1.18765	0.0913492	ALIX, PNUT, SYX1A, ALPHASNAP, RHO1	410	46	10968	2.90774	1	0.65217	0.629901
GOTERM_BP_DIRECT	GO:1904801~positive regulation of neuron remodeling	3	0.712589	0.093958	ARF1, BSK, CTP	410	14	10968	5.7324	1	0.657706	0.635247
GOTERM_BP_DIRECT	GO:0007617~mating behavior	3	0.712589	0.093958	DLG1, DNC, RAC2	410	14	10968	5.7324	1	0.657706	0.635247
GOTERM_BP_DIRECT	GO:0007009~plasma membrane organization	3	0.712589	0.093958	MIM, IRSP53, ALPHA-SPEC	410	14	10968	5.7324	1	0.657706	0.635247
GOTERM_BP_DIRECT	GO:0072553~terminal button organization	3	0.712589	0.093958	FMR1, SYN, VAP33	410	14	10968	5.7324	1	0.657706	0.635247
GOTERM_BP_DIRECT	GO:0090090~negative regulation of canonical Wnt signaling pathway	5	1.18765	0.0970672	REPT, SGG, SIN3A, TER94, RHO1	410	47	10968	2.84587	1	0.676172	0.653083
GOTERM_BP_DIRECT	GO:0035011~melanotic encapsulation of foreign target	4	0.950119	0.0996393	DCTN1-P150, NRG, RAC2, VAV	410	30	10968	3.56683	1	0.690736	0.66715

## Sheet: B
Gene Ontology (GO) enrichment analysis of O-GlcNAcylated protein candidates detected in the antennal lobe
Category	Term	Count	%	PValue	Genes	List Total	Pop Hits	Pop Total	Fold Enrichment	Bonferroni	Benjamini	FDR
GOTERM_BP_DIRECT	GO:0000398~mRNA splicing, via spliceosome	23	7.49186	3.20184e-07	MOD, TANGO4, SQD, SRP54, RSF1, BX42, SYP, U2AF38, IMP, LARK, SMD2, NONA, FAND, NITO, ABS, HSC70-4, PABP2, U2AF50, REF1, L(1)10BB, CRN, BCAS2, HEL25E	297	233	10968	3.64538	0.000359181	0.000359246	0.000354443
GOTERM_BP_DIRECT	GO:0000381~regulation of alternative mRNA splicing, via spliceosome	12	3.90879	2.07567e-05	FAND, NITO, CPSF6, U2AF50, SQD, DOA, SRP54, RSF1, U2AF38, HNRNP-K, CRN, HEL25E	297	87	10968	5.0937	0.0230202	0.0116445	0.0114888
GOTERM_BP_DIRECT	GO:0006414~translational elongation	6	1.9544	3.32764e-05	MEFTU1, MEFTU2, RPLP1, EEF1GAMMA, EEF5, EEF1ALPHA2	297	15	10968	14.7717	0.0366484	0.0124454	0.012279
GOTERM_BP_DIRECT	GO:0002181~cytoplasmic translation	12	3.90879	8.43008e-05	RPS14B, RPL30, RPL21, RPS29, RPS10B, RPL12, RPL10AB, RPLP1, RPLP0, RPL36, RPS21, RPS12	297	101	10968	4.38764	0.0902537	0.0236464	0.0233302
GOTERM_BP_DIRECT	GO:0006457~protein folding	11	3.58306	0.000112235	P23, CCT3, CCT2, CCT1, GP93, HSC70-5, ZDA, CCT8, CCT7, CCT6, DROJ2	297	87	10968	4.66922	0.118328	0.0251856	0.0248489
GOTERM_BP_DIRECT	GO:0048790~maintenance of presynaptic active zone structure	5	1.62866	0.000147661	BRP, RHOGAP100F, BETA-SPEC, RAB3, ALPHA-SPEC	297	11	10968	16.786	0.152689	0.0254328	0.0250928
GOTERM_BP_DIRECT	GO:0040003~chitin-based cuticle development	15	4.88599	0.000158672	TWDLT, CPR73D, CPR62BB, TWDLBETA, CPR76BD, CPR30F, CPR47EE, CPR49AB, SAR1, CPR49AG, VAJK4, L(3)MBN, CPR66D, CPR67B, VAJK1	297	166	10968	3.33698	0.163094	0.0254328	0.0250928
GOTERM_BP_DIRECT	GO:0045880~positive regulation of smoothened signaling pathway	8	2.60586	0.000406097	PKA-R1, GISH, CKIALPHA, CKIIALPHA, PKA-C1, TROL, MTS, BUR	297	51	10968	5.79283	0.366017	0.0569551	0.0561937
GOTERM_BP_DIRECT	GO:0048675~axon extension	6	1.9544	0.000571185	DCTN1-P150, NRG, RAB5, DNC, ANK2, RAC1	297	26	10968	8.52214	0.473263	0.0712078	0.0702558
GOTERM_BP_DIRECT	GO:0030036~actin cytoskeleton organization	9	2.9316	0.000684308	SIF, BETA-SPEC, RAC1, SN, ALPHA-SPEC, SHOT, CHER, LARK, MLP60A	297	72	10968	4.61616	0.536086	0.0746481	0.0736502
GOTERM_BP_DIRECT	GO:0071711~basement membrane organization	5	1.62866	0.000731845	VKG, LANB2, LANB1, MMP1, COL4A1	297	16	10968	11.5404	0.560198	0.0746481	0.0736502
GOTERM_BP_DIRECT	GO:0006413~translational initiation	7	2.28013	0.0013867	EIF3I, EIF4H1, EIF2ALPHA, EIF1A, EIF3D1, EIF3B, EIF4G1	297	46	10968	5.61968	0.789223	0.129656	0.127923
GOTERM_BP_DIRECT	GO:0016203~muscle attachment	6	1.9544	0.00176623	TSP, ILK, RAC1, SLS, SHOT, IF	297	33	10968	6.71442	0.862407	0.152439	0.150401
GOTERM_BP_DIRECT	GO:0034446~substrate adhesion-dependent cell spreading	4	1.30293	0.00202804	LANB2, LANB1, ILK, IF	297	10	10968	14.7717	0.897488	0.162533	0.16036
GOTERM_BP_DIRECT	GO:0045214~sarcomere organization	6	1.9544	0.00231201	ZIP, BT, HTS, SLS, CHER, IF	297	35	10968	6.33074	0.925509	0.172938	0.170626
GOTERM_BP_DIRECT	GO:0030727~germarium-derived female germ-line cyst formation	4	1.30293	0.00273318	AGO1, PDCD4, ALPHA-SPEC, INX2	297	11	10968	13.4288	0.953617	0.191665	0.189102
GOTERM_BP_DIRECT	GO:0050803~regulation of synapse structure or activity	5	1.62866	0.00306847	SIF, ARU, RAB5, SCRIB, ENDOA	297	23	10968	8.02811	0.968195	0.202519	0.199812
GOTERM_BP_DIRECT	GO:0006099~tricarboxylic acid cycle	6	1.9544	0.00334713	SCSBETAG, MDH1, MDH2, SDHC, IDH, SDHB	297	38	10968	5.83094	0.976758	0.208638	0.205848
GOTERM_BP_DIRECT	GO:0046959~habituation	4	1.30293	0.00357198	ME31B, SGG, ATX2, AGO1	297	12	10968	12.3098	0.981956	0.210935	0.208115
GOTERM_BP_DIRECT	GO:0030707~ovarian follicle cell development	8	2.60586	0.00432745	ME31B, SGG, CCT1, PAR-1, HSC70-4, SSRP, SCRIB, EIF3B	297	76	10968	3.88729	0.992295	0.233417	0.230297
GOTERM_BP_DIRECT	GO:0007615~anesthesia-resistant memory	4	1.30293	0.00455161	BRP, PKA-C1, DNC, CASK	297	13	10968	11.3629	0.994015	0.233417	0.230297
GOTERM_BP_DIRECT	GO:0045879~negative regulation of smoothened signaling pathway	7	2.28013	0.00457681	PP2A-29B, SGG, PKA-R1, GBETA13F, CKIALPHA, PKA-C1, MTS	297	58	10968	4.45698	0.994183	0.233417	0.230297
GOTERM_BP_DIRECT	GO:0045451~pole plasm oskar mRNA localization	6	1.9544	0.00575394	PAR-1, RAB6, SQD, KHC, HRB27C, TM1	297	43	10968	5.15292	0.998458	0.280692	0.27694
GOTERM_BP_DIRECT	GO:0035626~juvenile hormone mediated signaling pathway	3	0.977199	0.00687786	NUP358, FKBP39, CHD64	297	5	10968	22.1576	0.999566	0.306429	0.302333
GOTERM_BP_DIRECT	GO:0009888~tissue development	4	1.30293	0.00695782	LANB2, LANB1, WB, TROL	297	15	10968	9.84781	0.999604	0.306429	0.302333
GOTERM_BP_DIRECT	GO:0000278~mitotic cell cycle	11	3.58306	0.00710086	DCTN1-P150, BAP55, CKIIALPHA, TOP2, ALPHATUB85E, CHER, CCT6, MTS, LARK, SMD2, EIF4G1	297	149	10968	2.72632	0.999663	0.306429	0.302333
GOTERM_BP_DIRECT	GO:0006468~protein phosphorylation	13	4.23453	0.00836528	PAR-1, CKIIALPHA, ILK, CASK, DREF, SGG, EIP63E, PDK, GISH, CKIALPHA, PKA-C1, DOA, PKC53E	297	201	10968	2.38846	0.999919	0.347624	0.342976
GOTERM_BP_DIRECT	GO:0019933~cAMP-mediated signaling	3	0.977199	0.0101336	PKA-R1, PKA-C1, DNC	297	6	10968	18.4646	0.999989	0.392066	0.386825
GOTERM_BP_DIRECT	GO:0070831~basement membrane assembly	3	0.977199	0.0101336	PRC, LANB2, LANB1	297	6	10968	18.4646	0.999989	0.392066	0.386825
GOTERM_BP_DIRECT	GO:0009887~animal organ morphogenesis	4	1.30293	0.0117554	LANB2, LANB1, WB, TROL	297	18	10968	8.20651	0.999998	0.439651	0.433773
GOTERM_BP_DIRECT	GO:0048749~compound eye development	9	2.9316	0.0125413	ARF1, NITO, ATX2, RAS85D, CKIIALPHA, DOA, SCRIB, VHA100-1, DREF	297	115	10968	2.89012	0.999999	0.44674	0.440768
GOTERM_BP_DIRECT	GO:0006120~mitochondrial electron transport, NADH to ubiquinone	4	1.30293	0.0136854	ND-B14.5B, ND-49, ND-B22, ND-51	297	19	10968	7.77459	1	0.44674	0.440768
GOTERM_BP_DIRECT	GO:0008103~oocyte microtubule cytoskeleton polarization	4	1.30293	0.0136854	PKA-R1, RAB6, KHC, PKA-C1	297	19	10968	7.77459	1	0.44674	0.440768
GOTERM_BP_DIRECT	GO:0061640~cytoskeleton-dependent cytokinesis	3	0.977199	0.0139357	ZIP, SEPTIN2, SEPTIN4	297	7	10968	15.8268	1	0.44674	0.440768
GOTERM_BP_DIRECT	GO:0048789~cytoskeletal matrix organization at active zone	3	0.977199	0.0139357	BRP, RHOGAP100F, RAB3	297	7	10968	15.8268	1	0.44674	0.440768
GOTERM_BP_DIRECT	GO:0035099~hemocyte migration	4	1.30293	0.0157847	RAS85D, RAC1, SN, IF	297	20	10968	7.38586	1	0.491956	0.485379
GOTERM_BP_DIRECT	GO:0006338~chromatin remodeling	7	2.28013	0.0165576	NURF-38, MOR, BAP55, ACT5C, HCF, SNR1, HEL25E	297	76	10968	3.40138	1	0.499497	0.49282
GOTERM_BP_DIRECT	GO:0043044~ATP-dependent chromatin remodeling	4	1.30293	0.0180548	MOR, BAP55, SNR1, TRL	297	21	10968	7.03415	1	0.499497	0.49282
GOTERM_BP_DIRECT	GO:0033627~cell adhesion mediated by integrin	4	1.30293	0.0180548	TSP, LANB2, LANB1, IF	297	21	10968	7.03415	1	0.499497	0.49282
GOTERM_BP_DIRECT	GO:0034063~stress granule assembly	3	0.977199	0.0182526	ME31B, ATX2, RIN	297	8	10968	13.8485	1	0.499497	0.49282
GOTERM_BP_DIRECT	GO:0006164~purine nucleotide biosynthetic process	3	0.977199	0.0182526	PRAT2, PRPS, PUG	297	8	10968	13.8485	1	0.499497	0.49282
GOTERM_BP_DIRECT	GO:0008355~olfactory learning	5	1.62866	0.0221569	SGG, PKA-R1, GISH, PKA-C1, DNC	297	40	10968	4.61616	1	0.576235	0.568531
GOTERM_BP_DIRECT	GO:0007391~dorsal closure	8	2.60586	0.0223223	ZIP, RAS85D, COL4A1, SCRIB, PYD, RAC1, SHOT, MCR	297	104	10968	2.84071	1	0.576235	0.568531
GOTERM_BP_DIRECT	GO:0007395~dorsal closure, spreading of leading edge cells	3	0.977199	0.0230538	ZIP, RAS85D, RAC1	297	9	10968	12.3098	1	0.576235	0.568531
GOTERM_BP_DIRECT	GO:0010883~regulation of lipid storage	4	1.30293	0.023111	DELTACOP, RAB32, ARF1, LSD-1	297	23	10968	6.42249	1	0.576235	0.568531
GOTERM_BP_DIRECT	GO:0007298~border follicle cell migration	8	2.60586	0.0256162	ZIP, RALA, PAR-1, RAS85D, RAB5, CASK, RAC1, IF	297	107	10968	2.76107	1	0.624812	0.616459
GOTERM_BP_DIRECT	GO:0007269~neurotransmitter secretion	6	1.9544	0.0272371	BRP, ARF1, ARL8, HSC70-4, RAB3, CASK	297	63	10968	3.51708	1	0.648246	0.639579
GOTERM_BP_DIRECT	GO:0090328~regulation of olfactory learning	3	0.977199	0.0283102	ME31B, ATX2, AGO1	297	10	10968	11.0788	1	0.648246	0.639579
GOTERM_BP_DIRECT	GO:0035088~establishment or maintenance of apical/basal cell polarity	3	0.977199	0.0283102	RAS85D, RAB5, SCRIB	297	10	10968	11.0788	1	0.648246	0.639579
GOTERM_BP_DIRECT	GO:0051491~positive regulation of filopodium assembly	4	1.30293	0.0319858	SIF, FLO2, RAC1, SHOT	297	26	10968	5.68143	1	0.690154	0.680928
GOTERM_BP_DIRECT	GO:0016199~axon midline choice point recognition	4	1.30293	0.0319858	BETA-SPEC, RAC1, ALPHA-SPEC, SHOT	297	26	10968	5.68143	1	0.690154	0.680928
GOTERM_BP_DIRECT	GO:0007613~memory	4	1.30293	0.0319858	ARU, DNC, SCRIB, RAC1	297	26	10968	5.68143	1	0.690154	0.680928
GOTERM_BP_DIRECT	GO:0046664~dorsal closure, amnioserosa morphology change	3	0.977199	0.033994	ZIP, RAB5, RAC1	297	11	10968	10.0716	1	0.706319	0.696877
GOTERM_BP_DIRECT	GO:0001731~formation of translation preinitiation complex	3	0.977199	0.033994	MCTS1, EIF2GAMMA, EIF4H1	297	11	10968	10.0716	1	0.706319	0.696877
GOTERM_BP_DIRECT	GO:0007294~germarium-derived oocyte fate determination	4	1.30293	0.0352855	PAR-1, AGO1, HTS, ALPHA-SPEC	297	27	10968	5.47101	1	0.719823	0.7102
GOTERM_BP_DIRECT	GO:0007005~mitochondrion organization	5	1.62866	0.0399612	OPA1, NIPSNAP, LON, PHB2, DRP1	297	48	10968	3.8468	1	0.749466	0.739446
GOTERM_BP_DIRECT	GO:0061343~cell adhesion involved in heart morphogenesis	3	0.977199	0.0400784	PRC, NRG, GBETA13F	297	12	10968	9.23232	1	0.749466	0.739446
GOTERM_BP_DIRECT	GO:0045471~response to ethanol	3	0.977199	0.0400784	PKA-R1, ARU, HOMER	297	12	10968	9.23232	1	0.749466	0.739446
GOTERM_BP_DIRECT	GO:0007026~negative regulation of microtubule depolymerization	3	0.977199	0.0400784	BETA-SPEC, ALPHA-SPEC, SHOT	297	12	10968	9.23232	1	0.749466	0.739446
GOTERM_BP_DIRECT	GO:1900073~regulation of neuromuscular synaptic transmission	3	0.977199	0.0400784	CASK, SYP, PLC21C	297	12	10968	9.23232	1	0.749466	0.739446
GOTERM_BP_DIRECT	GO:0046627~negative regulation of insulin receptor signaling pathway	4	1.30293	0.0423887	PP2A-29B, SGG, PIP4K, MTS	297	29	10968	5.0937	1	0.771361	0.761049
GOTERM_BP_DIRECT	GO:0006397~mRNA processing	5	1.62866	0.0426242	CPSF5, CPSF6, U2AF50, BCAS2, SMD2	297	49	10968	3.7683	1	0.771361	0.761049
GOTERM_BP_DIRECT	GO:0009306~protein secretion	5	1.62866	0.0453851	DELTACOP, TANGO4, RAB3, DOA, SAR1	297	50	10968	3.69293	1	0.779334	0.768915
GOTERM_BP_DIRECT	GO:0035011~melanotic encapsulation of foreign target	4	1.30293	0.0461883	DCTN1-P150, NRG, FLO2, RAC1	297	30	10968	4.92391	1	0.779334	0.768915
GOTERM_BP_DIRECT	GO:0007229~integrin-mediated signaling pathway	3	0.977199	0.0465378	ICS, ILK, IF	297	13	10968	8.52214	1	0.779334	0.768915
GOTERM_BP_DIRECT	GO:0007303~cytoplasmic transport, nurse cell to oocyte	3	0.977199	0.0465378	KHC, CHER, LARK	297	13	10968	8.52214	1	0.779334	0.768915
GOTERM_BP_DIRECT	GO:0050807~regulation of synapse organization	3	0.977199	0.0465378	BETA-SPEC, RAC1, ALPHA-SPEC	297	13	10968	8.52214	1	0.779334	0.768915
GOTERM_BP_DIRECT	GO:0022416~chaeta development	5	1.62866	0.0482437	SGG, ATX2, CKIIALPHA, PYD, DREF	297	51	10968	3.62052	1	0.790823	0.78025
GOTERM_BP_DIRECT	GO:0051085~chaperone mediated protein folding requiring cofactor	4	1.30293	0.0501503	HSC70-4, HSC70-5, JDP, HIP-R	297	31	10968	4.76507	1	0.790823	0.78025
GOTERM_BP_DIRECT	GO:0000902~cell morphogenesis	5	1.62866	0.0511996	DY, CKIALPHA, SCRIB, RAC1, SAR1	297	52	10968	3.55089	1	0.790823	0.78025
GOTERM_BP_DIRECT	GO:1990547~mitochondrial phosphate ion transmembrane transport	2	0.651466	0.0532493	MPCP2, MPCP1	297	2	10968	36.9293	1	0.790823	0.78025
GOTERM_BP_DIRECT	GO:0042062~long-term strengthening of neuromuscular junction	2	0.651466	0.0532493	BETA-SPEC, ALPHA-SPEC	297	2	10968	36.9293	1	0.790823	0.78025
GOTERM_BP_DIRECT	GO:0061031~endodermal digestive tract morphogenesis	2	0.651466	0.0532493	GP93, LANB2	297	2	10968	36.9293	1	0.790823	0.78025
GOTERM_BP_DIRECT	GO:0070922~small RNA loading onto RISC	3	0.977199	0.0533477	P23, HSC70-4, AGO1	297	14	10968	7.91342	1	0.790823	0.78025
GOTERM_BP_DIRECT	GO:0030239~myofibril assembly	3	0.977199	0.0533477	ZIP, PRM, IF	297	14	10968	7.91342	1	0.790823	0.78025
GOTERM_BP_DIRECT	GO:0090263~positive regulation of canonical Wnt signaling pathway	5	1.62866	0.0542527	NITO, EIP63E, GISH, MTS, RPS12	297	53	10968	3.4839	1	0.790823	0.78025
GOTERM_BP_DIRECT	GO:0042026~protein refolding	4	1.30293	0.0542721	HSC70-4, HSC70-5, HSP23, DROJ2	297	32	10968	4.61616	1	0.790823	0.78025
GOTERM_BP_DIRECT	GO:0030198~extracellular matrix organization	4	1.30293	0.0585509	VKG, LANB1, MMP1, COL4A1	297	33	10968	4.47628	1	0.842232	0.830973
GOTERM_BP_DIRECT	GO:0043484~regulation of RNA splicing	3	0.977199	0.0604846	CPSF6, DOA, SSX	297	15	10968	7.38586	1	0.859034	0.84755
GOTERM_BP_DIRECT	GO:0032482~Rab protein signal transduction	4	1.30293	0.0629837	RAB32, RAB5, RAB6, RAB3	297	34	10968	4.34462	1	0.861802	0.85028
GOTERM_BP_DIRECT	GO:0019991~septate junction assembly	4	1.30293	0.0629837	NRG, SCRIB, TSF2, MCR	297	34	10968	4.34462	1	0.861802	0.85028
GOTERM_BP_DIRECT	GO:0042981~regulation of apoptotic process	4	1.30293	0.0629837	RAS85D, PKA-C1, DREP2, DREF	297	34	10968	4.34462	1	0.861802	0.85028
GOTERM_BP_DIRECT	GO:0007274~neuromuscular synaptic transmission	5	1.62866	0.0674249	BRP, PKA-R1, BETA-SPEC, CASK, ALPHA-SPEC	297	57	10968	3.23941	1	0.871386	0.859736
GOTERM_BP_DIRECT	GO:0018105~peptidyl-serine phosphorylation	5	1.62866	0.0674249	BT, GISH, CKIALPHA, CKIIALPHA, PKC53E	297	57	10968	3.23941	1	0.871386	0.859736
GOTERM_BP_DIRECT	GO:0008380~RNA splicing	4	1.30293	0.0675673	FAND, U2AF50, U2AF38, SMD2	297	35	10968	4.22049	1	0.871386	0.859736
GOTERM_BP_DIRECT	GO:0007443~Malpighian tubule morphogenesis	4	1.30293	0.0675673	ZIP, FAND, VKG, CRN	297	35	10968	4.22049	1	0.871386	0.859736
GOTERM_BP_DIRECT	GO:0048488~synaptic vesicle endocytosis	4	1.30293	0.0675673	ARF1, RAB5, CASK, ENDOA	297	35	10968	4.22049	1	0.871386	0.859736
GOTERM_BP_DIRECT	GO:0032981~mitochondrial respiratory chain complex I assembly	4	1.30293	0.0722985	ND-B14.5B, ND-B22, ND-39, ND-SGDH	297	36	10968	4.10325	1	0.875432	0.863728
GOTERM_BP_DIRECT	GO:0007552~metamorphosis	4	1.30293	0.0722985	EBPIII, EIP63E, RAS85D, FON	297	36	10968	4.10325	1	0.875432	0.863728
GOTERM_BP_DIRECT	GO:0000226~microtubule cytoskeleton organization	5	1.62866	0.0745769	PAR-1, ALPHATUB85E, ANK2, SHOT, MTS	297	59	10968	3.1296	1	0.875432	0.863728
GOTERM_BP_DIRECT	GO:0007409~axonogenesis	5	1.62866	0.0745769	NRG, RAB5, BETA-SPEC, KHC, SHOT	297	59	10968	3.1296	1	0.875432	0.863728
GOTERM_BP_DIRECT	GO:0016477~cell migration	5	1.62866	0.0745769	LANB2, RHOGAP100F, LANB1, SN, IF	297	59	10968	3.1296	1	0.875432	0.863728
GOTERM_BP_DIRECT	GO:0007476~imaginal disc-derived wing morphogenesis	8	2.60586	0.075207	ARF1, RAS85D, DY, LANB1, PKA-C1, SHOT, IF, TRL	297	136	10968	2.17231	1	0.875432	0.863728
GOTERM_BP_DIRECT	GO:0007160~cell-matrix adhesion	3	0.977199	0.0756505	PAX, ILK, IF	297	17	10968	6.51693	1	0.875432	0.863728
GOTERM_BP_DIRECT	GO:0042052~rhabdomere development	4	1.30293	0.0771737	DCTN1-P150, PROM, CHP, RAC1	297	37	10968	3.99236	1	0.875432	0.863728
GOTERM_BP_DIRECT	GO:0007601~visual perception	5	1.62866	0.0782913	NONA, SIF, DOA, CHP, ARR1	297	60	10968	3.07744	1	0.875432	0.863728
GOTERM_BP_DIRECT	GO:0003374~dynamin family protein polymerization involved in mitochondrial fission	2	0.651466	0.0788045	OPA1, DRP1	297	3	10968	24.6195	1	0.875432	0.863728
GOTERM_BP_DIRECT	GO:0055013~cardiac muscle cell development	2	0.651466	0.0788045	LANB1, COL4A1	297	3	10968	24.6195	1	0.875432	0.863728
GOTERM_BP_DIRECT	GO:0008302~female germline ring canal formation, actin assembly	2	0.651466	0.0788045	HTS, CHER	297	3	10968	24.6195	1	0.875432	0.863728
GOTERM_BP_DIRECT	GO:0097753~membrane bending	2	0.651466	0.0788045	HSC70-4, ENDOA	297	3	10968	24.6195	1	0.875432	0.863728
GOTERM_BP_DIRECT	GO:0043508~negative regulation of JUN kinase activity	2	0.651466	0.0788045	SGG, ICS	297	3	10968	24.6195	1	0.875432	0.863728
GOTERM_BP_DIRECT	GO:0001732~formation of cytoplasmic translation initiation complex	3	0.977199	0.0836374	EIF3I, EIF3D1, EIF3B	297	18	10968	6.15488	1	0.920011	0.907711
GOTERM_BP_DIRECT	GO:0007411~axon guidance	9	2.9316	0.0918407	HSC70-4, BETA-SPEC, RAB6, HTS, KHC, RAC1, WB, IF, BUR	297	171	10968	1.94365	1	0.989784	0.976552
GOTERM_BP_DIRECT	GO:0007310~oocyte dorsal/ventral axis specification	3	0.977199	0.091867	CKIIALPHA, KHC, SYP	297	19	10968	5.83094	1	0.989784	0.976552
GOTERM_BP_DIRECT	GO:1903688~positive regulation of border follicle cell migration	4	1.30293	0.0926269	ZIP, PAR-1, HRB27C, RAC1	297	40	10968	3.69293	1	0.989784	0.976552
GOTERM_BP_DIRECT	GO:0042060~wound healing	5	1.62866	0.0940452	ZIP, MTPALPHA, MMP1, SN, SHOT	297	64	10968	2.8851	1	0.99546	0.982152
GOTERM_BP_DIRECT	GO:0007623~circadian rhythm	4	1.30293	0.0980411	SGG, CKIIALPHA, DNC, LARK	297	41	10968	3.60286	1	1	0.987511
GOTERM_BP_DIRECT	GO:0045752~positive regulation of Toll signaling pathway	4	1.30293	0.0980411	PP2A-29B, GNBP3, DOA, MTS	297	41	10968	3.60286	1	1	0.987511

## Sheet: C
Gene Ontology (GO) enrichment analysis of O-GlcNAcylated protein candidates detected in the ellipsoid body
Category	Term	Count	%	PValue	Genes	List Total	Pop Hits	Pop Total	Fold Enrichment	Bonferroni	Benjamini	FDR
GOTERM_BP_DIRECT	GO:0040003~chitin-based cuticle development	24	10.1695	2.07238e-13	CPR64AA, TWDLT, CPR73D, SDT, CPR62BB, CPR97EB, CCP84AG, CPR47EA, CPR30F, CPR64AC, ACP65AA, CPR49AB, CPR49AA, CPR49AE, VAJK4, LCP65AC, L(3)MBN, CCP84AB, CPR72EC, VAJK2, CPR66D, VAJK3, CPR67B, VAJK1	221	166	10968	7.17527	1.94427e-10	1.9439e-10	1.91488e-10
GOTERM_BP_DIRECT	GO:0035099~hemocyte migration	7	2.9661	1.86413e-06	CDC42, RAS85D, RAP1, MYS, RAC1, SN, IF	221	20	10968	17.3701	0.00174703	0.000874277	0.000861228
GOTERM_BP_DIRECT	GO:0002181~cytoplasmic translation	12	5.08475	5.37546e-06	RPS25, RPL30, RPS29, RPL12, RPL11, 128UP, RPS2, RPS21, RPS24, RPS23, RPS12, RPS19A	221	101	10968	5.89651	0.0050295	0.00168073	0.00165564
GOTERM_BP_DIRECT	GO:0016203~muscle attachment	7	2.9661	4.28296e-05	RHEA, PARVIN, MYS, RAC1, SLS, SHOT, IF	221	33	10968	10.5274	0.0393787	0.0100435	0.00989363
GOTERM_BP_DIRECT	GO:0045214~sarcomere organization	7	2.9661	6.07011e-05	ZIP, RHEA, MYS, WUPA, MHC, SLS, IF	221	35	10968	9.92579	0.0553486	0.0113875	0.0112176
GOTERM_BP_DIRECT	GO:0000398~mRNA splicing, via spliceosome	15	6.35593	0.000251171	SQD, SMB, BX42, ACN, LARK, NONA, ABS, HFP, PABP2, U2AF50, PRP19, L(1)10BB, SF2, BCAS2, HEL25E	221	233	10968	3.195	0.209925	0.0341912	0.0336809
GOTERM_BP_DIRECT	GO:0006413~translational initiation	7	2.9661	0.000291496	EIF3I, EIF4H1, EIF3G1, EIF2ALPHA, EIF1A, EIF3D1, EIF4G1	221	46	10968	7.55223	0.239259	0.0341912	0.0336809
GOTERM_BP_DIRECT	GO:0007298~border follicle cell migration	10	4.23729	0.000291609	ZIP, RAB7, PAR-1, RHEA, RAS85D, RAP1, MYS, MHC, RAC1, IF	221	107	10968	4.63822	0.23934	0.0341912	0.0336809
GOTERM_BP_DIRECT	GO:0034446~substrate adhesion-dependent cell spreading	4	1.69492	0.000860813	TIG, PARVIN, MYS, IF	221	10	10968	19.8516	0.554158	0.0897159	0.0883768
GOTERM_BP_DIRECT	GO:0007391~dorsal closure	9	3.81356	0.00114007	ZIP, CDC42, RAS85D, COL4A1, RAP1, MYS, SCRIB, RAC1, SHOT	221	104	10968	4.29481	0.65699	0.0964837	0.0950436
GOTERM_BP_DIRECT	GO:0007349~cellularization	6	2.54237	0.00115225	CDC42, DCTN1-P150, SEPTIN2, FMR1, SYX1A, CLIP-190	221	40	10968	7.44434	0.660891	0.0964837	0.0950436
GOTERM_BP_DIRECT	GO:0007601~visual perception	7	2.9661	0.00123433	NONA, RAP1, MYS, FMR1, CRYS, RDGC, RTP	221	60	10968	5.79005	0.686049	0.0964837	0.0950436
GOTERM_BP_DIRECT	GO:0006936~muscle contraction	4	1.69492	0.00153198	ZIP, WUPA, MLC1, MHC	221	12	10968	16.543	0.762622	0.110539	0.108889
GOTERM_BP_DIRECT	GO:0007476~imaginal disc-derived wing morphogenesis	10	4.23729	0.00165185	SDB, RHEA, RAS85D, DY, MYS, BY, PKA-C1, SHOT, IF, TRL	221	136	10968	3.64919	0.787905	0.110674	0.109022
GOTERM_BP_DIRECT	GO:0000381~regulation of alternative mRNA splicing, via spliceosome	8	3.38983	0.0017826	HFP, U2AF50, SQD, PRP19, MUB, SF2, HNRNP-K, HEL25E	221	87	10968	4.56358	0.812424	0.111472	0.109808
GOTERM_BP_DIRECT	GO:0007229~integrin-mediated signaling pathway	4	1.69492	0.00196227	FIT1, MYS, ICS, IF	221	13	10968	15.2704	0.841566	0.115038	0.113321
GOTERM_BP_DIRECT	GO:0030239~myofibril assembly	4	1.69492	0.00246072	ZIP, WUPA, MHC, IF	221	14	10968	14.1797	0.900838	0.135774	0.133747
GOTERM_BP_DIRECT	GO:0007475~apposition of dorsal and ventral imaginal disc-derived wing surfaces	5	2.11864	0.00286644	RHEA, PARVIN, BY, ICS, IF	221	30	10968	8.27149	0.932294	0.149373	0.147144
GOTERM_BP_DIRECT	GO:0006338~chromatin remodeling	7	2.9661	0.00413651	NAP1, BAP55, MI-2, TOP1, SNR1, JARID2, HEL25E	221	76	10968	4.57109	0.979516	0.196424	0.193492
GOTERM_BP_DIRECT	GO:0048812~neuron projection morphogenesis	4	1.69492	0.00439755	CDC42, FMR1, RAC1, SN	221	17	10968	11.6774	0.983981	0.196424	0.193492
GOTERM_BP_DIRECT	GO:0007160~cell-matrix adhesion	4	1.69492	0.00439755	FIT1, MYS, PAX, IF	221	17	10968	11.6774	0.983981	0.196424	0.193492
GOTERM_BP_DIRECT	GO:0001732~formation of cytoplasmic translation initiation complex	4	1.69492	0.00519978	EIF3M, EIF3I, EIF3G1, EIF3D1	221	18	10968	11.0287	0.992479	0.2217	0.218391
GOTERM_BP_DIRECT	GO:0051017~actin filament bundle assembly	4	1.69492	0.0060844	IRSP53, JBUG, RAC1, SN	221	19	10968	10.4482	0.996735	0.248138	0.244434
GOTERM_BP_DIRECT	GO:0016477~cell migration	6	2.54237	0.00644919	CDC42, MSP300, RHOGAP100F, MYS, SN, IF	221	59	10968	5.04701	0.997686	0.252056	0.248294
GOTERM_BP_DIRECT	GO:0007266~Rho protein signal transduction	4	1.69492	0.00705351	CDC42, RHOGAPP190, ARU, RHOGAP100F	221	20	10968	9.92579	0.998692	0.262283	0.258368
GOTERM_BP_DIRECT	GO:0061640~cytoskeleton-dependent cytokinesis	3	1.27119	0.00787035	ZIP, SEPTIN2, SEPTIN4	221	7	10968	21.2696	0.999396	0.262283	0.258368
GOTERM_BP_DIRECT	GO:0043044~ATP-dependent chromatin remodeling	4	1.69492	0.00810895	BAP55, MI-2, SNR1, TRL	221	21	10968	9.45314	0.999518	0.262283	0.258368
GOTERM_BP_DIRECT	GO:0033627~cell adhesion mediated by integrin	4	1.69492	0.00810895	TIG, RHEA, MYS, IF	221	21	10968	9.45314	0.999518	0.262283	0.258368
GOTERM_BP_DIRECT	GO:0002168~instar larval development	4	1.69492	0.00810895	RAS85D, MMP1, BEL, TOP1	221	21	10968	9.45314	0.999518	0.262283	0.258368
GOTERM_BP_DIRECT	GO:0007163~establishment or maintenance of cell polarity	4	1.69492	0.00925236	CDC42, PARVIN, RAC1, SN	221	22	10968	9.02345	0.999837	0.289291	0.284973
GOTERM_BP_DIRECT	GO:0035001~dorsal trunk growth, open tracheal system	3	1.27119	0.0103558	MMP1, MYS, VARI	221	8	10968	18.6109	0.999943	0.313348	0.308671
GOTERM_BP_DIRECT	GO:0048477~oogenesis	12	5.08475	0.0110999	CDC42, SGG, HFP, SQD, PKA-C1, BEL, PAST1, RPS2, SN, TOP1, MTS, TRL	221	247	10968	2.41112	0.999972	0.325366	0.32051
GOTERM_BP_DIRECT	GO:0007395~dorsal closure, spreading of leading edge cells	3	1.27119	0.0131399	ZIP, RAS85D, RAC1	221	9	10968	16.543	0.999996	0.367192	0.361711
GOTERM_BP_DIRECT	GO:0042048~olfactory behavior	5	2.11864	0.0133097	PRPS, OBP99B, ARU, FMR1, SCRIB	221	46	10968	5.39445	0.999997	0.367192	0.361711
GOTERM_BP_DIRECT	GO:0007602~phototransduction	5	2.11864	0.0143248	PORIN, RAB6, RDGC, INX2, RTP	221	47	10968	5.27968	0.999999	0.373463	0.367889
GOTERM_BP_DIRECT	GO:0030036~actin cytoskeleton organization	6	2.54237	0.0146338	CDC42, JBUG, RAC1, SN, SHOT, LARK	221	72	10968	4.13575	0.999999	0.373463	0.367889
GOTERM_BP_DIRECT	GO:0048675~axon extension	4	1.69492	0.0147315	CDC42, DCTN1-P150, ANK2, RAC1	221	26	10968	7.63522	0.999999	0.373463	0.367889
GOTERM_BP_DIRECT	GO:0045880~positive regulation of smoothened signaling pathway	5	2.11864	0.018869	RAP1, CKIIALPHA, PKA-C1, TROL, MTS	221	51	10968	4.86558	1	0.465766	0.458815
GOTERM_BP_DIRECT	GO:0001731~formation of translation preinitiation complex	3	1.27119	0.0195527	MCTS1, EIF2GAMMA, EIF4H1	221	11	10968	13.5352	1	0.470268	0.463249
GOTERM_BP_DIRECT	GO:0007411~axon guidance	9	3.81356	0.0218847	CDC42, SLI, TIG, RAB6, MYS, FMR1, RAC1, WB, IF	221	171	10968	2.61205	1	0.513195	0.505535
GOTERM_BP_DIRECT	GO:0031122~cytoplasmic microtubule organization	4	1.69492	0.0257494	SDB, DCTN1-P150, SHOT, CLIP-190	221	32	10968	6.20362	1	0.589096	0.580304
GOTERM_BP_DIRECT	GO:0035160~maintenance of epithelial integrity, open tracheal system	3	1.27119	0.0270104	RHEA, MYS, IF	221	13	10968	11.4528	1	0.603233	0.594229
GOTERM_BP_DIRECT	GO:0030198~extracellular matrix organization	4	1.69492	0.0279159	VKG, MMP1, COL4A1, MFAS	221	33	10968	6.01563	1	0.607402	0.598336
GOTERM_BP_DIRECT	GO:0006811~ion transport	4	1.69492	0.0301765	PORIN, PORIN2, TOM40, INX2	221	34	10968	5.8387	1	0.607402	0.598336
GOTERM_BP_DIRECT	GO:0035149~lumen formation, open tracheal system	4	1.69492	0.0301765	CCT3, DCTN1-P150, RHEA, SHOT	221	34	10968	5.8387	1	0.607402	0.598336
GOTERM_BP_DIRECT	GO:0000226~microtubule cytoskeleton organization	5	2.11864	0.0303923	PAR-1, ALPHATUB85E, ANK2, SHOT, MTS	221	59	10968	4.20584	1	0.607402	0.598336
GOTERM_BP_DIRECT	GO:0000278~mitotic cell cycle	8	3.38983	0.0304348	DCTN1-P150, BAP55, CKIIALPHA, EIF3G1, ALPHATUB85E, MTS, LARK, EIF4G1	221	149	10968	2.66464	1	0.607402	0.598336
GOTERM_BP_DIRECT	GO:0006417~regulation of translation	4	1.69492	0.0325306	MCTS1, FMR1, RPS21, EIF4G1	221	35	10968	5.67188	1	0.635702	0.626214
GOTERM_BP_DIRECT	GO:0045475~locomotor rhythm	5	2.11864	0.0374181	SGG, FMR1, CKIIALPHA, LARK, FER2LCH	221	63	10968	3.93881	1	0.703831	0.693326
GOTERM_BP_DIRECT	GO:0040011~locomotion	4	1.69492	0.0375177	MSP300, FMR1, MHC, SLS	221	37	10968	5.36529	1	0.703831	0.693326
GOTERM_BP_DIRECT	GO:0042060~wound healing	5	2.11864	0.0393083	ZIP, CDC42, MMP1, SN, SHOT	221	64	10968	3.87726	1	0.707141	0.696587
GOTERM_BP_DIRECT	GO:0051492~regulation of stress fiber assembly	2	0.847458	0.0397162	MYS, IF	221	2	10968	49.629	1	0.707141	0.696587
GOTERM_BP_DIRECT	GO:0071711~basement membrane organization	3	1.27119	0.0399557	VKG, MMP1, COL4A1	221	16	10968	9.30543	1	0.707141	0.696587
GOTERM_BP_DIRECT	GO:0007155~cell adhesion	5	2.11864	0.0453012	VINC, RHEA, MMP1, MYS, MFAS	221	67	10968	3.70365	1	0.765221	0.753799
GOTERM_BP_DIRECT	GO:1903688~positive regulation of border follicle cell migration	4	1.69492	0.0456848	ZIP, PAR-1, HRB27C, RAC1	221	40	10968	4.9629	1	0.765221	0.753799
GOTERM_BP_DIRECT	GO:0007507~heart development	4	1.69492	0.0456848	PRC, ACER, SGG, WUPA	221	40	10968	4.9629	1	0.765221	0.753799
GOTERM_BP_DIRECT	GO:0007623~circadian rhythm	4	1.69492	0.0485869	SGG, FMR1, CKIIALPHA, LARK	221	41	10968	4.84185	1	0.799553	0.78762
GOTERM_BP_DIRECT	GO:0035331~negative regulation of hippo signaling	4	1.69492	0.0546548	PAR-1, RAP1, MTS, STRN-MLCK	221	43	10968	4.61665	1	0.851147	0.838443
GOTERM_BP_DIRECT	GO:0045451~pole plasm oskar mRNA localization	4	1.69492	0.0546548	PAR-1, RAB6, SQD, HRB27C	221	43	10968	4.61665	1	0.851147	0.838443
GOTERM_BP_DIRECT	GO:0036098~male germ-line stem cell population maintenance	3	1.27119	0.0547574	BEL, HIS2AV, INX2	221	19	10968	7.83615	1	0.851147	0.838443
GOTERM_BP_DIRECT	GO:0031589~cell-substrate adhesion	2	0.847458	0.0589814	TIG, MYS	221	3	10968	33.086	1	0.851147	0.838443
GOTERM_BP_DIRECT	GO:1900364~negative regulation of mRNA polyadenylation	2	0.847458	0.0589814	FMR1, NAB2	221	3	10968	33.086	1	0.851147	0.838443
GOTERM_BP_DIRECT	GO:0043508~negative regulation of JUN kinase activity	2	0.847458	0.0589814	SGG, ICS	221	3	10968	33.086	1	0.851147	0.838443
GOTERM_BP_DIRECT	GO:0006930~substrate-dependent cell migration, cell extension	2	0.847458	0.0589814	RAP1, MYS	221	3	10968	33.086	1	0.851147	0.838443
GOTERM_BP_DIRECT	GO:0048621~post-embryonic digestive tract morphogenesis	2	0.847458	0.0589814	COL4A1, FMR1	221	3	10968	33.086	1	0.851147	0.838443
GOTERM_BP_DIRECT	GO:0007314~oocyte anterior/posterior axis specification	3	1.27119	0.0711536	PAR-1, SQD, PKA-C1	221	22	10968	6.76759	1	0.960979	0.946636
GOTERM_BP_DIRECT	GO:0007465~R7 cell fate commitment	3	1.27119	0.0711536	RAS85D, RAP1, MTS	221	22	10968	6.76759	1	0.960979	0.946636
GOTERM_BP_DIRECT	GO:0007317~regulation of pole plasm oskar mRNA localization	3	1.27119	0.0711536	PAR-1, PKA-C1, SYX1A	221	22	10968	6.76759	1	0.960979	0.946636
GOTERM_BP_DIRECT	GO:0007005~mitochondrion organization	4	1.69492	0.0713076	HSP60A, PORIN, NIPSNAP, DRP1	221	48	10968	4.13575	1	0.960979	0.946636
GOTERM_BP_DIRECT	GO:0010468~regulation of gene expression	6	2.54237	0.0724042	SQD, BEL, MUB, PZG, SF2, HNRNP-K	221	111	10968	2.68265	1	0.960979	0.946636
GOTERM_BP_DIRECT	GO:0031532~actin cytoskeleton reorganization	3	1.27119	0.0769315	CDC42, PARVIN, RAC1	221	23	10968	6.47334	1	0.960979	0.946636
GOTERM_BP_DIRECT	GO:0050770~regulation of axonogenesis	3	1.27119	0.0769315	CDC42, RHOGAPP190, RAC1	221	23	10968	6.47334	1	0.960979	0.946636
GOTERM_BP_DIRECT	GO:0090162~establishment of epithelial cell polarity	2	0.847458	0.0778618	SDT, MTS	221	4	10968	24.8145	1	0.960979	0.946636
GOTERM_BP_DIRECT	GO:0000280~nuclear division	2	0.847458	0.0778618	WUPA, TRL	221	4	10968	24.8145	1	0.960979	0.946636
GOTERM_BP_DIRECT	GO:0045185~maintenance of protein location	2	0.847458	0.0778618	CDC42, IF	221	4	10968	24.8145	1	0.960979	0.946636
GOTERM_BP_DIRECT	GO:0002183~cytoplasmic translational initiation	2	0.847458	0.0778618	EIF3M, EIF3I	221	4	10968	24.8145	1	0.960979	0.946636
GOTERM_BP_DIRECT	GO:0035317~imaginal disc-derived wing hair organization	3	1.27119	0.0828518	ZIP, RAP1, SN	221	24	10968	6.20362	1	1	0.986126
GOTERM_BP_DIRECT	GO:0007525~somatic muscle development	3	1.27119	0.0889064	MSP300, VKG, SLS	221	25	10968	5.95548	1	1	0.986126
GOTERM_BP_DIRECT	GO:0051491~positive regulation of filopodium assembly	3	1.27119	0.0950876	CDC42, RAC1, SHOT	221	26	10968	5.72642	1	1	0.986126
GOTERM_BP_DIRECT	GO:0016199~axon midline choice point recognition	3	1.27119	0.0950876	SLI, RAC1, SHOT	221	26	10968	5.72642	1	1	0.986126
GOTERM_BP_DIRECT	GO:0007613~memory	3	1.27119	0.0950876	ARU, SCRIB, RAC1	221	26	10968	5.72642	1	1	0.986126
GOTERM_BP_DIRECT	GO:0007508~larval heart development	2	0.847458	0.0963651	PRC, MYS	221	5	10968	19.8516	1	1	0.986126
GOTERM_BP_DIRECT	GO:0072002~Malpighian tubule development	2	0.847458	0.0963651	RAS85D, SCRIB	221	5	10968	19.8516	1	1	0.986126
GOTERM_BP_DIRECT	GO:0007502~digestive tract mesoderm development	2	0.847458	0.0963651	SLI, WB	221	5	10968	19.8516	1	1	0.986126
GOTERM_BP_DIRECT	GO:0034453~microtubule anchoring	2	0.847458	0.0963651	SDB, MSP300	221	5	10968	19.8516	1	1	0.986126
GOTERM_BP_DIRECT	GO:0021551~central nervous system morphogenesis	2	0.847458	0.0963651	MYS, IF	221	5	10968	19.8516	1	1	0.986126
GOTERM_BP_DIRECT	GO:2000767~positive regulation of cytoplasmic translation	2	0.847458	0.0963651	CNBP, LARK	221	5	10968	19.8516	1	1	0.986126
GOTERM_BP_DIRECT	GO:0048738~cardiac muscle tissue development	2	0.847458	0.0963651	FIT1, WUPA	221	5	10968	19.8516	1	1	0.986126

## Sheet: D
Gene Ontology (GO) enrichment analysis of O-GlcNAcylated protein candidates detected in the optic lobe
Category	Term	Count	%	PValue	Genes	List Total	Pop Hits	Pop Total	Fold Enrichment	Bonferroni	Benjamini	FDR
GOTERM_BP_DIRECT	GO:0040003~chitin-based cuticle development	14	7.1066	5.31818e-06	CPR62BC, CPR64AA, CPR73D, SDT, CPR64AD, CPR47EA, CPR30F, CPR64AC, VAJK4, GASP, L(3)MBN, CPR72EC, CPR66D, VAJK3	189	166	10968	4.89424	0.00407074	0.00407904	0.00406841
GOTERM_BP_DIRECT	GO:0045880~positive regulation of smoothened signaling pathway	7	3.5533	0.000222138	PKA-R1, GISH, CKIALPHA, CKIIALPHA, PKA-C1, TROL, MTS	189	51	10968	7.96514	0.156671	0.0576416	0.0574913
GOTERM_BP_DIRECT	GO:0016203~muscle attachment	6	3.04569	0.000225456	TSP, RHEA, PARVIN, SLS, SHOT, IF	189	33	10968	10.5512	0.158815	0.0576416	0.0574913
GOTERM_BP_DIRECT	GO:0043044~ATP-dependent chromatin remodeling	5	2.53807	0.000398185	MOR, BAP55, POLYBROMO, SNR1, TRL	189	21	10968	13.8171	0.263222	0.0763519	0.0761528
GOTERM_BP_DIRECT	GO:0006413~translational initiation	6	3.04569	0.0010877	EIF3I, EIF4H1, EIF2ALPHA, EIF1A, EIF3F1, EIF4G1	189	46	10968	7.56936	0.566005	0.166854	0.166419
GOTERM_BP_DIRECT	GO:0045879~negative regulation of smoothened signaling pathway	6	3.04569	0.00308198	PP2A-29B, PKA-R1, CKIALPHA, PKA-C1, TER94, MTS	189	58	10968	6.00328	0.906288	0.321334	0.320496
GOTERM_BP_DIRECT	GO:0006457~protein folding	7	3.5533	0.0037485	P23, CCT3, GP93, DNAJ-1, CCT7, DROJ2, CCT4	189	87	10968	4.66922	0.943893	0.321334	0.320496
GOTERM_BP_DIRECT	GO:0008103~oocyte microtubule cytoskeleton polarization	4	2.03046	0.00392296	PKA-R1, RAB6, KHC, PKA-C1	189	19	10968	12.2172	0.950946	0.321334	0.320496
GOTERM_BP_DIRECT	GO:0000278~mitotic cell cycle	9	4.56853	0.00409652	DCTN1-P150, BAP55, CKIIALPHA, BETATUB85D, TOP2, ALPHATUB85E, MTS, LARK, EIF4G1	189	149	10968	3.50527	0.957083	0.321334	0.320496
GOTERM_BP_DIRECT	GO:0019933~cAMP-mediated signaling	3	1.52284	0.00418949	PKA-R1, PKA-C1, DNC	189	6	10968	29.0159	0.960048	0.321334	0.320496
GOTERM_BP_DIRECT	GO:0033627~cell adhesion mediated by integrin	4	2.03046	0.00525083	TSP, TIG, RHEA, IF	189	21	10968	11.0537	0.982367	0.366126	0.365171
GOTERM_BP_DIRECT	GO:0045899~positive regulation of RNA polymerase II transcriptional preinitiation complex assembly	3	1.52284	0.00764559	RPT4, RPT5, RPT1	189	8	10968	21.7619	0.997224	0.488681	0.487406
GOTERM_BP_DIRECT	GO:0007430~terminal branching, open tracheal system	4	2.03046	0.0118486	CCT3, VHAAC39-1, RHEA, RAS85D	189	28	10968	8.29025	0.999893	0.658178	0.656462
GOTERM_BP_DIRECT	GO:0034446~substrate adhesion-dependent cell spreading	3	1.52284	0.0120137	TIG, PARVIN, IF	189	10	10968	17.4095	0.999906	0.658178	0.656462
GOTERM_BP_DIRECT	GO:0046627~negative regulation of insulin receptor signaling pathway	4	2.03046	0.013052	PP2A-29B, DOCK, PIP4K, MTS	189	29	10968	8.00438	0.999958	0.66739	0.66565
GOTERM_BP_DIRECT	GO:0007474~imaginal disc-derived wing vein specification	5	2.53807	0.0144474	MOR, RAS85D, PAST1, LPIN, SNR1	189	55	10968	5.27561	0.999986	0.692573	0.690767
GOTERM_BP_DIRECT	GO:0000226~microtubule cytoskeleton organization	5	2.53807	0.0182931	BETATUB85D, ALPHATUB85E, TER94, SHOT, MTS	189	59	10968	4.91794	0.999999	0.783587	0.781544
GOTERM_BP_DIRECT	GO:0035149~lumen formation, open tracheal system	4	2.03046	0.0200855	CCT3, DCTN1-P150, RHEA, SHOT	189	34	10968	6.82726	1	0.783587	0.781544
GOTERM_BP_DIRECT	GO:0007615~anesthesia-resistant memory	3	1.52284	0.0201338	BRP, PKA-C1, DNC	189	13	10968	13.3919	1	0.783587	0.781544
GOTERM_BP_DIRECT	GO:0007291~sperm individualization	5	2.53807	0.0204325	EIF3M, ACT5C, GISH, PAST1, CTP	189	61	10968	4.7567	1	0.783587	0.781544
GOTERM_BP_DIRECT	GO:0045214~sarcomere organization	4	2.03046	0.0216977	BT, RHEA, SLS, IF	189	35	10968	6.6322	1	0.792482	0.790415
GOTERM_BP_DIRECT	GO:0048477~oogenesis	10	5.07614	0.0264368	SQD, PKA-C1, BEL, PAST1, TM1, SN, TER94, MTS, CTP, TRL	189	247	10968	2.34946	1	0.908263	0.905895
GOTERM_BP_DIRECT	GO:0007155~cell adhesion	5	2.53807	0.0277464	VINC, TSP, RHEA, MMP1, FLO2	189	67	10968	4.33073	1	0.908263	0.905895
GOTERM_BP_DIRECT	GO:0007476~imaginal disc-derived wing morphogenesis	7	3.5533	0.0294969	RHEA, RAS85D, PKA-C1, SHOT, IF, CTP, TRL	189	136	10968	2.98693	1	0.908263	0.905895
GOTERM_BP_DIRECT	GO:0002181~cytoplasmic translation	6	3.04569	0.0296676	RPS25, RPS29, RPL10AB, 128UP, RPS5A, RPL13	189	101	10968	3.44743	1	0.908263	0.905895
GOTERM_BP_DIRECT	GO:0008355~olfactory learning	4	2.03046	0.0307886	PKA-R1, GISH, PKA-C1, DNC	189	40	10968	5.80317	1	0.908263	0.905895
GOTERM_BP_DIRECT	GO:0030036~actin cytoskeleton organization	5	2.53807	0.0348935	VPS4, JBUG, SN, SHOT, LARK	189	72	10968	4.02998	1	0.987809	0.985234
GOTERM_BP_DIRECT	GO:0045451~pole plasm oskar mRNA localization	4	2.03046	0.0370612	RAB6, SQD, KHC, TM1	189	43	10968	5.3983	1	0.987809	0.985234
GOTERM_BP_DIRECT	GO:0001732~formation of cytoplasmic translation initiation complex	3	1.52284	0.0373487	EIF3M, EIF3I, EIF3F1	189	18	10968	9.67196	1	0.987809	0.985234
GOTERM_BP_DIRECT	GO:0008587~imaginal disc-derived wing margin morphogenesis	4	2.03046	0.0392865	MOR, PAST1, LPIN, SNR1	189	44	10968	5.27561	1	0.990184	0.987602
GOTERM_BP_DIRECT	GO:0051017~actin filament bundle assembly	3	1.52284	0.0412812	JBUG, SN, CTP	189	19	10968	9.16291	1	0.990184	0.987602
GOTERM_BP_DIRECT	GO:0006338~chromatin remodeling	5	2.53807	0.0413115	MOR, BAP55, ACT5C, POLYBROMO, SNR1	189	76	10968	3.81788	1	0.990184	0.987602
GOTERM_BP_DIRECT	GO:0035099~hemocyte migration	3	1.52284	0.0453616	RAS85D, SN, IF	189	20	10968	8.70476	1	1	0.998695
GOTERM_BP_DIRECT	GO:0007005~mitochondrion organization	4	2.03046	0.0488473	OPA1, NIPSNAP, LON, DRP1	189	48	10968	4.83598	1	1	0.998695
GOTERM_BP_DIRECT	GO:0007406~negative regulation of neuroblast proliferation	3	1.52284	0.0495838	MOR, SNR1, MTS	189	21	10968	8.29025	1	1	0.998695
GOTERM_BP_DIRECT	GO:0002168~instar larval development	3	1.52284	0.0495838	RAS85D, MMP1, BEL	189	21	10968	8.29025	1	1	0.998695
GOTERM_BP_DIRECT	GO:0003374~dynamin family protein polymerization involved in mitochondrial fission	2	1.01523	0.0505505	OPA1, DRP1	189	3	10968	38.6878	1	1	0.998695
GOTERM_BP_DIRECT	GO:0006123~mitochondrial electron transport, cytochrome c to oxygen	3	1.52284	0.0539417	COX4L, COX7A, COX4	189	22	10968	7.91342	1	1	0.998695
GOTERM_BP_DIRECT	GO:0007317~regulation of pole plasm oskar mRNA localization	3	1.52284	0.0539417	KHC, PKA-C1, TER94	189	22	10968	7.91342	1	1	0.998695
GOTERM_BP_DIRECT	GO:0032543~mitochondrial translation	5	2.53807	0.0664679	MRPL53, MRPL40, MRPS11, MRPL48, MRPL46	189	89	10968	3.26021	1	1	0.998695
GOTERM_BP_DIRECT	GO:0090162~establishment of epithelial cell polarity	2	1.01523	0.0668292	SDT, MTS	189	4	10968	29.0159	1	1	0.998695
GOTERM_BP_DIRECT	GO:0006728~pteridine biosynthetic process	2	1.01523	0.0668292	SE, PU	189	4	10968	29.0159	1	1	0.998695
GOTERM_BP_DIRECT	GO:0002183~cytoplasmic translational initiation	2	1.01523	0.0668292	EIF3M, EIF3I	189	4	10968	29.0159	1	1	0.998695
GOTERM_BP_DIRECT	GO:0018105~peptidyl-serine phosphorylation	4	2.03046	0.0740413	BT, GISH, CKIALPHA, CKIIALPHA	189	57	10968	4.0724	1	1	0.998695
GOTERM_BP_DIRECT	GO:0010738~regulation of protein kinase A signaling	2	1.01523	0.0828303	PKA-R1, DNC	189	5	10968	23.2127	1	1	0.998695
GOTERM_BP_DIRECT	GO:0048312~intracellular distribution of mitochondria	2	1.01523	0.0828303	KHC, DRP1	189	5	10968	23.2127	1	1	0.998695
GOTERM_BP_DIRECT	GO:0051131~chaperone-mediated protein complex assembly	2	1.01523	0.0828303	P23, LON	189	5	10968	23.2127	1	1	0.998695
GOTERM_BP_DIRECT	GO:0007498~mesoderm development	4	2.03046	0.0900749	BT, ALD1, MLC1, SLS	189	62	10968	3.74398	1	1	0.998695
GOTERM_BP_DIRECT	GO:0007475~apposition of dorsal and ventral imaginal disc-derived wing surfaces	3	1.52284	0.0930252	RHEA, PARVIN, IF	189	30	10968	5.80317	1	1	0.998695
GOTERM_BP_DIRECT	GO:0042060~wound healing	4	2.03046	0.0968618	MTPALPHA, MMP1, SN, SHOT	189	64	10968	3.62698	1	1	0.998695
