# Supplementary material for: Tissue-specific O-GlcNAcylation profiling identifies substrates in translational machinery in Drosophila mushroom body contributing to olfactory learning
Source: eLife journal article supplement (doi:10.7554/elife.91269), 2024-03-15
Supplement: fig4-data3 [file elife-91269-fig4-data3-v1.zip]

## Sheet: A
Figure 4A
	mRNA levels							Normalized O-GlcNAc levels
Gene Symbol	Mushroom body	Brain-neuron	Antennal lobe	Ellipsoid body	Optic lobe		Gene Symbol	Mushroom body	Brain-neuron	Antennal lobe	Ellipsoid body	Optic lobe
RpL10Ab	7.7817	7.83061	8.39578	12.4982	7.74142		RpL10Ab	10.6411	0	8.33459	0	19.1446
RpL11	6.55966	7.2235	7.09607	8.92647	7.58611		RpL11	1.77604	17.3751	0	7.8116	0
RpL12	10.7784	11.0949	12.0115	11.2428	11.1924		RpL12	10.7135	0	8.56482	8.40596	0
RpL13	11.1274	10.925	9.5395	10.5817	10.9359		RpL13	1.28344	0	0	0	8.78668
RpL13A	8.37616	8.5085	9.12085	8.78844	8.52613		RpL13A	1.3701	0	0	0	0
RpL14	15.0741	16.3904	18.8149	14.1047	16.9586		RpL14	1.33732	7.82324	0	0	0
RpL17	6.96277	7.56181	8.98235	6.98625	7.78601		RpL17	2.3829	0	0	0	0
RpL18	11.1231	12.0475	10.3489	7.7012	12.7823		RpL18	1.2044	0	0	0	0
RpL23A	10.8932	12.0855	11.1753	11.13	12.8543		RpL23A	3.33784	0	0	0	0
RpL24	14.7345	14.2871	15.3141	13.0959	13.9615		RpL24	2.49783	0	0	0	0
RpL27	8.02597	8.76272	8.28892	7.27856	9.24303		RpL27	1.37659	0	0	0	0
RpL27A	15.7964	16.4769	12.0488	17.5822	17.232		RpL27A	2.66351	0	0	0	0
RpL3	8.52719	8.85483	10.3102	8.97441	8.91211		RpL3	3.74982	0	0	0	0
RpL30	3.9596	4.32909	5.88196	6.15192	4.37688		RpL30	12.2545	0	7.5439	21.4019	0
RpL32	13.9125	13.7208	14.8882	14.3033	13.5021		RpL32	9.80215	0	0	0	0
RpL34a	1.93472	2.01334	1.95076	2.2409	2.06005		RpL34a	19.9444	0	0	0	0
RpL34b	5.66131	8.54246	6.52062	7.65649	10.3641		RpL34b	3.77358	0	0	0	0
RpL35	7.6894	10.1623	9.58493	12.2374	11.5839		RpL35	15.4102	0	0	0	0
RpL36	22.3593	20.5097	18.6713	24.9451	19.5571		RpL36	7.844	0	8.82147	0	0
RpL37A	11.6801	11.1201	9.93727	14.868	10.8514		RpL37A	31.077	0	0	0	0
RpL4	4.77465	5.58736	7.0349	4.78067	5.93365		RpL4	3.29324	0	0	0	0
RpL6	11.0129	12.0531	13.2961	14.4894	12.499		RpL6	4.07373	0	0	0	0
RpL7	12.6534	13.3107	13.6286	8.82726	13.7206		RpL7	13.6717	0	0	0	0
RpL8	14.1053	14.5901	12.0024	13.5211	15.1057		RpL8	1.10173	8.14924	0	0	0
RpLP0	8.05371	8.1323	11.039	5.35582	7.96411		RpLP0	9.55889	7.92379	12.7534	0	0
RpS10b	12.3424	11.0409	9.82164	12.5669	10.3874		RpS10b	8.54208	7.85137	19.4063	0	0
RpS12	10.1138	11.4337	12.2208	7.76339	12.1665		RpS12	11.4186	16.3702	16.2045	12.5099	0
RpS13	9.63774	8.81862	9.18781	9.79677	8.30807		RpS13	17.9235	0	0	0	0
RpS14b	7.05499	7.01562	7.14951	9.12102	6.95112		RpS14b	1.07112	0	0.341385	0	0
RpS15Ab	0.507025	0.575123	0.348211	0.816602	0.629964		RpS15Ab	18.8353	0	0	0	0
RpS16	6.57276	6.72726	8.15616	9.36295	6.65222		RpS16	0.56674	0	0	0	0
RpS17	12.8671	12.1633	11.9527	13.8988	11.7576		RpS17	1.34745	0	0	0	0
RpS18	9.74961	10.1441	9.07553	11.6922	10.4382		RpS18	10.4043	0	0	0	0
RpS19a	7.51812	6.63679	6.37775	7.70516	6.14436		RpS19a	16.391	0	0	7.47624	0
RpS23	8.29411	7.21127	6.50483	7.75332	6.65122		RpS23	1.29518	0	0	9.2807	0
RpS24	9.97575	11.0406	7.75855	10.4276	11.9387		RpS24	2.54297	0	0	7.68094	0
RpS26	16.6282	17.2469	12.6736	18.3976	17.9789		RpS26	11.7972	8.5379	0	0	0
RpS28b	15.405	15.4466	13.7998	17.1028	15.5895		RpS28b	9.30403	0	0	0	0
RpS29	15.9632	16.7009	16.9258	19.8001	17.0544		RpS29	9.92611	0	9.70756	16.1528	9.52843
RpS5a	6.40531	5.56049	6.93114	6.69624	4.94593		RpS5a	16.661	16.0877	0	0	21.755
RpS6	11.2767	11.3025	11.0086	10.0133	11.3614		RpS6	2.3739	0	0	0	0
RpS8	16.1094	16.4334	18.1676	16.5947	16.4637		RpS8	3.82887	0	0	0	0
RpS9	13.5457	12.4911	13.4525	15.1533	11.7711		RpS9	1.03944	0	0	0	0
RpS3	14.521	15.8994	11.9912	13.8066	17.0512		RpS3	18.8759	0	0	0	0

## Sheet: B
Figure 4B

## Sheet: C
Figure 4C
	OK107-Gal4
	CpOGADM	CpOGAWT	dMyc	dMyc, CpOGAWT
Performance index	72.7643	52.2183	66.6667	61.5789
	71.7097	43.6168	65.8537	56.1429
	60.8158	38.7993	70.7865	55.1429
	58.9069	32.8028	63.2921	53.0864
	55.7665	22.9161	60.396	52.0833
	54.1592	21.8608	56.1404	50.5155
				45.2632
P value	0.001
		0.012
P values were determined by unpaired t-test

## Sheet: E
Figure 4E
OPP fluorescent intensity		Relative OPP fluorescent intnesity (Mushroom body/Whole brain)	OPP fluorescent intensity		Relative OPP fluorescent intnesity (Mushroom body/Whole brain)	OPP fluorescent intensity		Relative OPP fluorescent intnesity (Mushroom body/Whole brain)
Mushroom body	Whole brain		Mushroom body	Whole brain		Mushroom body	Whole brain
OK107-Gal4>CpOGADM			OK107-Gal4>CpOGAWT			OK107-Gal4>dMyc, CpOGAWT
19.063	22.431	0.849851	15.8	33.711	0.46869	36.004	24.497	1.46973
31.266	22.431	1.39387	18.035	36.849	0.48943	34.251	24.497	1.39817
19.466	26.908	0.723428	20.129	36.849	0.546256	11.913	15.442	0.771467
16.156	26.908	0.600416	16.175	23.571	0.686225	17.87	25.442	0.702382
33.485	18.761	1.78482	9.032	23.571	0.383183	23.218	17.773	1.30636
27.168	18.761	1.44811	17.345	28.155	0.616054	18.666	17.773	1.05024
26.632	33.446	0.796269	17.145	28.155	0.60895	18.355	23.446	0.782863
33.874	33.446	1.0128	12.432	18.671	0.665845	22.438	23.446	0.957008
33.12	23.861	1.38804	11.022	18.671	0.590327
27.291	24.861	1.09774	23.132	24.111	0.959396
57.775	26.536	2.17723	13.303	14.515	0.9165
33.66	26.538	1.26837
Relative OPP fluorescent intensity
OK107-Gal4>CpOGADM	OK107-Gal4>CpOGAWT	OK107-Gal4>dMyc, CpOGAWT
0.849851	0.739825	1.46973
1.39387	0.46869	1.39817
0.723428	0.48943	0.771467
0.600416	0.546256	0.702382
1.78482	0.686225	1.30636
1.44811	0.383183	1.05024
0.796269	0.616054	0.782863
1.0128	0.60895	0.957008
1.38804	0.665845
1.09774	0.590327
2.17723	0.959396
1.26837	0.9165
P value = 0.0006
	P value = 0.01
P values were determined by unpaired t-test
