# Supplementary material for: Tissue-specific O-GlcNAcylation profiling identifies substrates in translational machinery in Drosophila mushroom body contributing to olfactory learning
Source: eLife journal article supplement (doi:10.7554/elife.91269), 2024-03-15
Supplement: fig4-figsupp1-data1 [file Figure 4-figure supplement 1-source data1.xlsx]

## Sheet: A
The proportion of ribosomal proteins in the O-GlcNAcome of different brain structures identified by TurboID-CpOGACD
	Brain-neuron	Mushroom body	Antennal lobe	Optic lobe	Ellipsoid body
Number of O-GlcNAcylated proteins	491	455	377	234	289
Number of O-GlcNAcylated ribosomal proteins	9	44	11	5	9
Proportion（%）	1.83299	9.67033	2.91777	2.13675	3.11419

## Sheet: B
mRNA levels and O-GlcNAc levels of candidate ribosomal substrates in mushroom body
Gene Symbol	O-GlcNAc levels	mRNA levels
RpL10Ab	10.6411	7.7817
RpL11	1.77604	6.55966
RpL12	10.7135	10.7784
RpL13	1.28344	11.1274
RpL13A	1.3701	8.37616
RpL14	1.33732	15.0741
RpL17	2.3829	6.96277
RpL18	1.2044	11.1231
RpL23A	3.33784	10.8932
RpL24	2.49783	14.7345
RpL27	1.37659	8.02597
RpL27A	2.66351	15.7964
RpL3	3.74982	8.52719
RpL30	12.2545	3.9596
RpL32	9.80215	13.9125
RpL34a	19.9444	1.93472
RpL34b	3.77358	5.66131
RpL35	15.4102	7.6894
RpL36	7.844	22.3593
RpL37A	31.077	11.6801
RpL4	3.29324	4.77465
RpL6	4.07373	11.0129
RpL7	13.6717	12.6534
RpL8	1.10173	14.1053
RpLP0	9.55889	8.05371
RpS10b	8.54208	12.3424
RpS12	11.4186	10.1138
RpS13	17.9235	9.63774
RpS14b	1.07112	7.05499
RpS15Ab	18.8353	0.507025
RpS16	0.56674	6.57276
RpS17	1.34745	12.8671
RpS18	10.4043	9.74961
RpS19a	16.391	7.51812
RpS23	1.29518	8.29411
RpS24	2.54297	9.97575
RpS26	11.7972	16.6282
RpS28b	9.30403	15.405
RpS29	9.92611	15.9632
RpS3	18.8759	6.40531
RpS5a	16.661	11.2767
RpS6	2.3739	16.1094
RpS8	3.82887	13.5457
RpS9	1.03944	14.521

## Sheet: D
		OK107-GAL4
	OK107-Gal4	Luciferase-RNAi	RPL5-RNAi	RPS26-RNAi	RPL24-RNAi	RPS6-RNAi	RPL11-RNAi	RPS3-RNAi	RPL32-RNAi	RPS28b-RNAi
Performance index	53.0081	54.2243	73.5811	51.1096	39.599	47.2561	51.9108	38.2683	54.2308	36.7978
	53.8462	52.1277	70.7937	67.0448	39.6187	52.0908	56.7268	39.4481	60.2129	43.3174
	61.8088	53.5964	64.4681	47.7743	35.4732	45.7002	45.116	34.9835	53.1554	61.7347
	61.6037	64.4116	56.9892	45.3838	29.1891	30.7112	45.7406	37.7758	58.1169	56.4169
	54.1667	58.9815			26.055	46.7498	49.2641	39.5074	45.0984	53.9316
		58.9353			30.1961		53.5259		55.8555
P value	control	control	0.429	0.43	<0.0001	0.017	0.042	<0.0001	0.437	0.229
P values were determined by unpaired t-test

## Sheet: C
		DA-Gal4
	DA-Gal4	UAS-RPL5-RNAi	UAS-RPS26-RNAi	UAS-RPL24-RNAi	UAS-RPS6-RNAi	UAS-RPL11-RNAi	UAS-RPS3-RNAi	UAS-RPL32-RNAi	UAS-RPS28B-RNAi
Relative mRNA level	1.00573	0.756721	0.706727	0.816212	0.308349	0.339327	0.149858	0.443984	0.685451
	0.972487	0.701767	0.623796	0.772238	0.269924	0.247858	0.193892	0.536032	0.779664
	1.12243	0.722141	0.679631	0.764295	0.295484	0.302515	0.218909	0.503261	0.704437
P value	control	0.0031	0.0021	0.0067	<0.0001	0.0002	<0.0001	0.0005	0.0045
P values were determined by unpaired t-test

## Sheet: E
	OK107-Gal4
	Luciferase-RNAi	RPL24-RNAi	RPS6-RNAi	RPL11-RNAi	RPS3-RNAi
Odor Acuity Performance index (MCH)	75.3623	79.4393	80.2817	72.3077	51.8797
	72.043	48.4536	81.1966	53.3981	61.4035
	59.596	87.8788	85.1852	68.932	84.6154
	71.4286	52.9412	44.3609	51.4286	70.1149
	63.0435	86.9565	90.9091	79.5918	63.0435
	66.6667	62.7907	69.2308	89.899	71.7172
P value	control	0.823	0.345	0.854	0.866
P values were determined by unpaired t-test

## Sheet: F
	OK107-Gal4
	Luciferase-RNAi	RPL24-RNAi	RPS6-RNAi	RPL11-RNAi	RPS3-RNAi
Odor Acuity Performance index (OCT)	56.5217	53.7415	57.5758	54.3307	44
	67.5214	40.7407	44.6809	60	50.5618
	54.5455	48.4536	31.5789	58.7302	38.7755
	64.3564	47.619	56.5217	69.863	57.4468
	65.1163	67.3913	40.2299	75	55.814
	56.3218	59.4203	68.75	63.6364	62.8866
P value	control	0.11	0.099	0.475	0.06
P values were determined by unpaired t-test
