# Supplementary material for: Tissue-specific O-GlcNAcylation profiling identifies substrates in translational machinery in Drosophila mushroom body contributing to olfactory learning
Source: eLife. 2024 Apr 15;13:e91269. doi: 10.7554/eLife.91269 (PMC11018347; doi:10.7554/eLife.91269)
Supplement: Supplementary file 1. [file elife-91269-supp1.xlsx]

## Sheet: Sheet1
O-GlcNAcylated proteins identified by TurboID-CpOGA CD from HEK293T cells
NO.	Majority protein IDs	Gene Symble	Peptides	Razor + unique peptides	Unique peptides	Log2 (intensity+1)		Log2 Fold Change
						TurboID-CpOGA CD	TurboID-CpOGA DM
1	sp|P49790|NU153_HUMAN	NUP153	26	26	26	28.0449	0	28.0449
2	sp|Q9ULT8|HECD1_HUMAN	HECTD1	31	31	31	27.1252	0	27.1252
3	sp|Q9UKX7|NUP50_HUMAN	NUP50	16	16	16	26.9957	0	26.9957
4	sp|P35658|NU214_HUMAN	NUP214	18	18	18	26.8169	0	26.8169
5	sp|O95487|SC24B_HUMAN	SEC24B	17	17	17	26.752	0	26.752
6	sp|Q96HA1|P121A_HUMAN	POM121	13	13	4	26.3108	0	26.3108
7	sp|P57740|NU107_HUMAN	NUP107	5	5	5	26.0672	0	26.0672
8	sp|Q7Z3B4|NUP54_HUMAN	NUP54	11	11	11	25.7136	0	25.7136
9	sp|A8CG34|P121C_HUMAN	POM121C	12	3	3	25.6791	0	25.6791
10	sp|Q9P2N5|RBM27_HUMAN	RBM27	10	10	9	25.4681	0	25.4681
11	sp|Q13435|SF3B2_HUMAN	SF3B2	7	7	7	25.4036	0	25.4036
12	sp|P52948|NUP98_HUMAN	NUP98	8	8	8	25.2556	0	25.2556
13	sp|Q92734|TFG_HUMAN	TFG	6	6	6	25.1812	0	25.1812
14	sp|A3KN83|SBNO1_HUMAN	SBNO1	14	14	14	25.1558	0	25.1558
15	sp|Q9H5V9|CX056_HUMAN	STEEP1	6	6	6	25.0264	0	25.0264
16	sp|Q8TD19|NEK9_HUMAN	NEK9	8	8	8	24.8479	0	24.8479
17	sp|Q09666|AHNK_HUMAN	AHNAK	3	3	3	24.7828	0	24.7828
18	sp|Q96M27|PRRC1_HUMAN	PRRC1	4	4	4	24.6994	0	24.6994
19	sp|Q99496|RING2_HUMAN	RNF2	4	4	4	24.3731	0	24.3731
20	sp|Q06587|RING1_HUMAN	RING1	4	4	4	24.3731	0	24.3731
21	sp|Q96QT6|PHF12_HUMAN	PHF12	6	6	6	24.3397	0	24.3397
22	sp|Q6P3W7|SCYL2_HUMAN	SCYL2	6	6	6	24.2628	0	24.2628
23	sp|P05387|RLA2_HUMAN	RPLP2	3	3	3	24.0058	0	24.0058
24	sp|Q9P2N6|KANL3_HUMAN	KANSL3	4	4	4	23.9603	0	23.9603
25	sp|Q96I24|FUBP3_HUMAN	FUBP3	5	5	5	23.9261	0	23.9261
26	sp|Q9NVM9|INT13_HUMAN	INTS13	7	7	7	23.8279	0	23.8279
27	sp|P78346|RPP30_HUMAN	RPP30	4	4	4	23.788	0	23.788
28	sp|Q9Y2W1|TR150_HUMAN	THRAP3	3	3	3	23.7184	0	23.7184
29	sp|Q9H9G7|AGO3_HUMAN	AGO3	12	6	4	23.6996	0	23.6996
30	sp|Q9HCK5|AGO4_HUMAN	AGO4	12	6	4	23.6996	0	23.6996
31	sp|O60563|CCNT1_HUMAN	CCNT1	3	3	3	23.6219	0	23.6219
32	sp|Q9UBL3|ASH2L_HUMAN	ASH2L	3	3	3	23.5846	0	23.5846
33	sp|Q5T8P6|RBM26_HUMAN	RBM26	5	4	4	23.572	0	23.572
34	sp|O75175|CNOT3_HUMAN	CNOT3	4	4	4	23.5647	0	23.5647
35	sp|Q13586|STIM1_HUMAN	STIM1	4	4	4	23.4969	0	23.4969
36	sp|Q9NUD5|ZCHC3_HUMAN	ZCCHC3	5	5	5	23.4415	0	23.4415
37	sp|Q92560|BAP1_HUMAN	BAP1	5	5	5	23.4234	0	23.4234
38	sp|Q01433|AMPD2_HUMAN	AMPD2	4	4	4	23.4214	0	23.4214
39	sp|Q9NW64|RBM22_HUMAN	RBM22	3	3	3	23.4061	0	23.4061
40	sp|Q9NPF5|DMAP1_HUMAN	DMAP1	4	4	4	23.3982	0	23.3982
41	sp|Q8IWZ3|ANKH1_HUMAN	ANKHD1	9	5	5	23.3687	0	23.3687
42	sp|O75381|PEX14_HUMAN	PEX14	3	3	3	23.3576	0	23.3576
43	sp|Q7Z739|YTHD3_HUMAN	YTHDF3	5	3	3	23.3543	0	23.3543
44	sp|Q9BYJ9|YTHD1_HUMAN	YTHDF1	5	3	3	23.3543	0	23.3543
45	sp|Q9BVL2|NUP58_HUMAN	NUP58	3	3	3	23.3317	0	23.3317
46	sp|Q8N6T3|ARFG1_HUMAN	ARFGAP1	3	3	3	23.2627	0	23.2627
47	sp|Q96D46|NMD3_HUMAN	NMD3	4	4	4	23.2146	0	23.2146
48	sp|Q07021|C1QBP_HUMAN	C1QBP	2	2	2	23.2057	0	23.2057
49	sp|Q96T76|MMS19_HUMAN	MMS19	5	5	5	23.2055	0	23.2055
50	sp|P63165|SUMO1_HUMAN	SUMO1	2	2	2	23.1709	0	23.1709
51	sp|G2XKQ0|SUMO5_HUMAN	SUMO1P1	2	2	2	23.1709	0	23.1709
52	sp|Q14671|PUM1_HUMAN	PUM1	3	3	3	23.1299	0	23.1299
53	sp|Q96QC0|PP1RA_HUMAN	PPP1R10	3	3	3	23.0776	0	23.0776
54	sp|Q14680|MELK_HUMAN	MELK	3	3	3	23.0626	0	23.0626
55	sp|Q6UXN9|WDR82_HUMAN	WDR82	3	3	3	22.9883	0	22.9883
56	sp|Q13043|STK4_HUMAN	STK4	3	3	3	22.959	0	22.959
57	sp|Q13188|STK3_HUMAN	STK3	3	3	3	22.959	0	22.959
58	sp|P11274|BCR_HUMAN	BCR	4	4	4	22.9584	0	22.9584
59	sp|Q02241|KIF23_HUMAN	KIF23	6	6	6	22.9513	0	22.9513
60	sp|Q8N163|CCAR2_HUMAN	CCAR2	3	3	3	22.9512	0	22.9512
61	sp|Q86WJ1|CHD1L_HUMAN	CHD1L	3	3	3	22.9362	0	22.9362
62	sp|Q12874|SF3A3_HUMAN	SF3A3	3	3	3	22.9164	0	22.9164
63	sp|Q9UBD5|ORC3_HUMAN	ORC3	3	3	3	22.9068	0	22.9068
64	sp|O75717|WDHD1_HUMAN	WDHD1	5	5	5	22.9051	0	22.9051
65	sp|P78347|GTF2I_HUMAN	GTF2I	3	3	3	22.8731	0	22.8731
66	sp|P08729|K2C7_HUMAN	KRT7	9	5	5	22.8593	0	22.8593
67	sp|Q9Y5Q8|TF3C5_HUMAN	GTF3C5	3	3	3	22.8224	0	22.8224
68	sp|Q9H2P0|ADNP_HUMAN	ADNP	2	2	2	22.7975	0	22.7975
69	sp|O00213|APBB1_HUMAN	APBB1	3	3	3	22.7866	0	22.7866
70	sp|Q13123|RED_HUMAN	IK	2	2	2	22.6467	0	22.6467
71	sp|Q969R5|LMBL2_HUMAN	L3MBTL2	3	3	3	22.6306	0	22.6306
72	sp|Q8TF46|DI3L1_HUMAN	DIS3L	2	2	2	22.6149	0	22.6149
73	sp|O95619|YETS4_HUMAN	YEATS4	2	2	2	22.6105	0	22.6105
74	sp|O15379|HDAC3_HUMAN	HDAC3	5	5	5	22.6036	0	22.6036
75	sp|Q99728|BARD1_HUMAN	BARD1	2	2	2	22.5911	0	22.5911
76	sp|Q16795|NDUA9_HUMAN	NDUFA9	3	3	3	22.5878	0	22.5878
77	sp|Q9NVC6|MED17_HUMAN	MED17	2	2	2	22.5878	0	22.5878
78	sp|Q9UKY7|CDV3_HUMAN	CDV3	2	2	2	22.5827	0	22.5827
79	sp|Q9P2J3|KLHL9_HUMAN	KLHL9	3	3	3	22.5448	0	22.5448
80	sp|Q9P2N7|KLH13_HUMAN	KLHL13	3	3	3	22.5448	0	22.5448
81	sp|Q13356|PPIL2_HUMAN	PPIL2	2	2	2	22.5363	0	22.5363
82	sp|Q92844|TANK_HUMAN	TANK	2	2	2	22.488	0	22.488
83	sp|Q9BUJ2|HNRL1_HUMAN	HNRNPUL1	3	3	3	22.4786	0	22.4786
84	sp|Q8TCG1|CIP2A_HUMAN	CIP2A	2	2	2	22.3764	0	22.3764
85	sp|Q9H4L7|SMRCD_HUMAN	SMARCAD1	2	2	2	22.3626	0	22.3626
86	sp|O95639|CPSF4_HUMAN	CPSF4	3	3	3	22.34	0	22.34
87	sp|Q2VPK5|CTU2_HUMAN	CTU2	4	4	4	22.3378	0	22.3378
88	sp|P78312|F193A_HUMAN	FAM193A	2	2	2	22.3311	0	22.3311
89	sp|Q96HE9|PRR11_HUMAN	PRR11	2	2	2	22.3237	0	22.3237
90	sp|Q9BTE3|MCMBP_HUMAN	MCMBP	4	4	4	22.302	0	22.302
91	sp|Q9UM00|TMCO1_HUMAN	TMCO1	2	2	2	22.2909	0	22.2909
92	sp|Q9Y4W2|LAS1L_HUMAN	LAS1L	4	4	4	22.2873	0	22.2873
93	sp|Q86XP3|DDX42_HUMAN	DDX42	2	2	2	22.2782	0	22.2782
94	sp|Q8IWI9|MGAP_HUMAN	MGA	3	3	3	22.2531	0	22.2531
95	sp|P29375|KDM5A_HUMAN	KDM5A	2	2	2	22.2189	0	22.2189
96	sp|O14929|HAT1_HUMAN	HAT1	2	2	2	22.2036	0	22.2036
97	sp|Q9P0J0|NDUAD_HUMAN	NDUFA13	2	2	2	22.1714	0	22.1714
98	sp|Q9H981|ARP8_HUMAN	ACTR8	2	2	2	22.1682	0	22.1682
99	sp|O75152|ZC11A_HUMAN	ZC3H11A	2	2	2	22.1679	0	22.1679
100	sp|Q14320|FA50A_HUMAN	FAM50A	2	2	2	22.0189	0	22.0189
101	sp|Q9Y247|FA50B_HUMAN	FAM50B	2	2	2	22.0189	0	22.0189
102	sp|P54198|HIRA_HUMAN	HIRA	3	3	3	22.0069	0	22.0069
103	sp|Q92552|RT27_HUMAN	MRPS27	3	3	3	21.984	0	21.984
104	sp|P46459|NSF_HUMAN	NSF	3	3	3	21.9755	0	21.9755
105	sp|P15927|RFA2_HUMAN	RPA2	3	3	3	21.9566	0	21.9566
106	sp|Q96RP9|EFGM_HUMAN	GFM1	2	2	2	21.9282	0	21.9282
107	sp|Q9BW27|NUP85_HUMAN	NUP85	2	2	2	21.9188	0	21.9188
108	sp|Q96DF8|ESS2_HUMAN	ESS2	3	3	3	21.9008	0	21.9008
109	sp|Q03164|KMT2A_HUMAN	KMT2A	3	3	3	21.8842	0	21.8842
110	sp|O00425|IF2B3_HUMAN	IGF2BP3	4	2	2	21.8609	0	21.8609
111	sp|Q8IZH2|XRN1_HUMAN	XRN1	3	3	3	21.8507	0	21.8507
112	sp|O00257|CBX4_HUMAN	CBX4	2	2	2	21.847	0	21.847
113	sp|O95486|SC24A_HUMAN	SEC24A	2	2	2	21.8419	0	21.8419
114	sp|Q13625|ASPP2_HUMAN	TP53BP2	2	2	2	21.841	0	21.841
115	sp|Q96KQ4|ASPP1_HUMAN	PPP1R13B	2	2	2	21.841	0	21.841
116	sp|Q05048|CSTF1_HUMAN	CSTF1	2	2	2	21.7977	0	21.7977
117	sp|Q9H1D9|RPC6_HUMAN	POLR3F	2	2	2	21.777	0	21.777
118	sp|Q8WVM0|TFB1M_HUMAN	TFB1M	2	2	2	21.7266	0	21.7266
119	sp|Q5JSZ5|PRC2B_HUMAN	PRRC2B	2	2	2	21.6844	0	21.6844
120	sp|Q9NRG9|AAAS_HUMAN	AAAS	2	2	2	21.6448	0	21.6448
121	sp|Q9ULG1|INO80_HUMAN	INO80	2	2	2	21.6348	0	21.6348
122	sp|O94874|UFL1_HUMAN	UFL1	2	2	2	21.6147	0	21.6147
123	sp|P78345|RPP38_HUMAN	RPP38	2	2	2	21.5927	0	21.5927
124	sp|Q9Y3M9|ZN337_HUMAN	ZNF337	2	2	2	21.5787	0	21.5787
125	sp|Q9UJX4|APC5_HUMAN	ANAPC5	2	2	2	21.5463	0	21.5463
126	sp|Q92879|CELF1_HUMAN	CELF1	2	2	2	21.5046	0	21.5046
127	sp|Q9UKZ1|CNO11_HUMAN	CNOT11	2	2	2	21.463	0	21.463
128	sp|Q9BXB4|OSB11_HUMAN	OSBPL11	2	2	2	21.4571	0	21.4571
129	sp|Q9BXB5|OSB10_HUMAN	OSBPL10	2	2	2	21.4571	0	21.4571
130	sp|Q16763|UBE2S_HUMAN	UBE2S	2	2	2	21.2834	0	21.2834
131	sp|Q6NSI4|RADX_HUMAN	RADX	2	2	2	21.2622	0	21.2622
132	sp|Q14527|HLTF_HUMAN	HLTF	2	2	2	21.1738	0	21.1738
133	sp|Q9UPW5|CBPC1_HUMAN	AGTPBP1	2	2	2	21.126	0	21.126
134	sp|Q86UE8|TLK2_HUMAN	TLK2	2	2	2	21.0754	0	21.0754
135	sp|Q9UKI8|TLK1_HUMAN	TLK1	2	2	2	21.0754	0	21.0754
136	sp|Q58A45|PAN3_HUMAN	PAN3	2	2	2	21.0552	0	21.0552
137	sp|Q9HCJ3|RAVR2_HUMAN	RAVER2	2	2	2	20.9169	0	20.9169
138	sp|P61421|VA0D1_HUMAN	ATP6V0D1	2	2	2	20.9117	0	20.9117
139	sp|Q12768|WASC5_HUMAN	WASHC5	2	2	2	20.6967	0	20.6967
140	sp|Q6ZRV2|FA83H_HUMAN	FAM83H	2	2	2	20.4022	0	20.4022
141	sp|Q9BWT3|PAPOG_HUMAN	PAPOLG	2	2	2	20.3886	0	20.3886
142	sp|Q9NRJ5|PAPOB_HUMAN	PAPOLB	2	2	2	20.4022	0	20.4022
143	sp|P51003|PAPOA_HUMAN	PAPOLA	2	2	2	20.3886	0	20.3886
144	sp|Q96SI9|STRBP_HUMAN	STRBP	3	2	2	20.3602	0	20.3602
145	sp|Q9UNH7|SNX6_HUMAN	SNX6	2	2	2	20.2379	0	20.2379
146	sp|Q9BVJ6|UT14A_HUMAN	UTP14A	2	2	2	19.6678	0	19.6678
147	sp|Q5TAP6|UT14C_HUMAN	UTP14C	2	2	2	19.6678	0	19.6678
148	sp|O15294|OGT1_HUMAN	OGT	32	32	32	28.3432	22.9579	5.38531
149	sp|Q14157|UBP2L_HUMAN	UBAP2L	18	18	18	28.2478	23.2281	5.01965
150	sp|Q16512|PKN1_HUMAN	PKN1	11	11	11	25.4717	20.4837	4.98797
151	sp|Q7L014|DDX46_HUMAN	DDX46	17	17	17	26.2655	21.291	4.97442
152	sp|Q9Y6Y8|S23IP_HUMAN	SEC23IP	16	16	16	27.1438	22.2106	4.93328
153	sp|Q99567|NUP88_HUMAN	NUP88	22	22	22	27.9095	22.9853	4.92428
154	sp|P49792|RBP2_HUMAN	RANBP2	19	19	14	26.2332	21.3804	4.85285
155	sp|Q8NDV7|TNR6A_HUMAN	TNRC6A	9	9	9	24.6224	20.1986	4.42381
156	sp|Q8IX01|SUGP2_HUMAN	SUGP2	14	14	14	25.6026	21.2592	4.34344
157	sp|P37198|NUP62_HUMAN	NUP62	5	5	5	25.8174	21.5476	4.26972
158	sp|Q5T6F2|UBAP2_HUMAN	UBAP2	10	10	10	26.8974	22.7092	4.18812
159	sp|Q9Y2X9|ZN281_HUMAN	ZNF281	11	11	11	26.9807	22.9085	4.07215
160	sp|Q9NSV4|DIAP3_HUMAN	DIAPH3	8	8	8	24.3248	20.3255	3.99925
161	sp|Q6PJP8|DCR1A_HUMAN	DCLRE1A	7	7	7	24.1073	20.1311	3.97618
162	sp|Q6MZP7|LIN54_HUMAN	LIN54	13	13	13	25.4959	21.5836	3.91237
163	sp|O14974|MYPT1_HUMAN	PPP1R12A	8	8	8	25.6749	21.815	3.85991
164	sp|Q9UN86|G3BP2_HUMAN	G3BP2	7	6	6	23.7393	19.9988	3.74054
165	sp|Q96EK4|THA11_HUMAN	THAP11	4	4	4	24.8733	21.3455	3.5278
166	sp|O75643|U520_HUMAN	SNRNP200	11	11	11	24.9705	21.4614	3.50914
167	sp|Q13310|PABP4_HUMAN	PABPC4	19	10	10	27.5113	24.0469	3.46441
168	sp|Q15436|SC23A_HUMAN	SEC23A	16	16	14	26.7638	23.3437	3.42015
169	sp|Q9UKK6|NXT1_HUMAN	NXT1	2	2	2	22.7988	19.4283	3.3705
170	sp|O75179|ANR17_HUMAN	ANKRD17	12	12	8	24.7848	21.4215	3.36329
171	sp|Q8WTW3|COG1_HUMAN	COG1	9	9	9	24.0983	20.8525	3.24574
172	sp|Q68CZ6|HAUS3_HUMAN	HAUS3	5	5	5	22.7016	19.483	3.21855
173	sp|P48634|PRC2A_HUMAN	PRRC2A	5	5	5	24.237	21.0217	3.21528
174	sp|O14641|DVL2_HUMAN	DVL2	3	3	3	24.1873	20.9755	3.21182
175	sp|Q8N1G2|CMTR1_HUMAN	CMTR1	16	16	16	26.1237	22.9141	3.20959
176	sp|Q6Y7W6|GGYF2_HUMAN	GIGYF2	5	5	5	24.1908	21.0162	3.1746
177	sp|A5YKK6|CNOT1_HUMAN	CNOT1	5	5	5	22.5283	19.5059	3.02233
178	sp|Q96QD5|DEPD7_HUMAN	DEPDC7	6	6	6	24.2028	21.2311	2.97166
179	sp|Q8WWM7|ATX2L_HUMAN	ATXN2L	14	14	14	26.5504	23.6614	2.88899
180	sp|Q6DKI1|RL7L_HUMAN	RPL7L1	5	5	5	23.2284	20.3692	2.85917
181	sp|Q9BUI4|RPC3_HUMAN	POLR3C	4	4	4	23.7245	20.872	2.85253
182	sp|Q8WUU5|GATD1_HUMAN	GATAD1	3	3	3	22.696	19.877	2.81899
183	sp|O43318|M3K7_HUMAN	MAP3K7	4	4	4	23.7797	21.0166	2.76308
184	sp|P27824|CALX_HUMAN	CANX	2	2	2	23.0723	20.3145	2.75775
185	sp|Q14807|KIF22_HUMAN	KIF22	5	5	5	23.4467	20.8024	2.64431
186	sp|Q6P4R8|NFRKB_HUMAN	NFRKB	13	13	13	25.2845	22.6956	2.58889
187	sp|Q99700|ATX2_HUMAN	ATXN2	3	3	3	23.7546	21.1797	2.57493
188	sp|Q9UJZ1|STML2_HUMAN	STOML2	4	4	4	23.2922	20.7335	2.55874
189	sp|P10398|ARAF_HUMAN	ARAF	3	3	3	23.3382	20.813	2.52524
190	sp|P04049|RAF1_HUMAN	RAF1	3	3	3	23.3382	20.813	2.52524
191	sp|Q96A49|SYAP1_HUMAN	SYAP1	4	4	4	23.7816	21.2715	2.51007
192	sp|P61011|SRP54_HUMAN	SRP54	5	5	5	24.2629	21.7739	2.48897
193	sp|Q14694|UBP10_HUMAN	USP10	6	6	6	23.6456	21.1596	2.48598
194	sp|Q92797|SYMPK_HUMAN	SYMPK	3	3	3	23.4935	21.04	2.45351
195	sp|Q9UBU9|NXF1_HUMAN	NXF1	12	12	12	25.9957	23.5427	2.45298
196	sp|Q00013|EM55_HUMAN	MPP1	7	7	7	23.7016	21.274	2.42754
197	sp|Q7Z417|NUFP2_HUMAN	NUFIP2	9	9	9	25.5714	23.1506	2.42078
198	sp|Q9NSE4|SYIM_HUMAN	IARS2	3	3	3	23.1267	20.738	2.38871
199	sp|Q8IYB1|M21D2_HUMAN	MB21D2	3	3	3	22.3406	19.9549	2.38571
200	sp|Q92600|CNOT9_HUMAN	CNOT9	3	3	3	24.1737	21.8261	2.34766
201	sp|Q71RC2|LARP4_HUMAN	LARP4	4	4	4	23.6836	21.3361	2.34748
202	sp|Q99570|PI3R4_HUMAN	PIK3R4	5	5	5	22.2543	19.9431	2.31127
203	sp|Q8TEQ6|GEMI5_HUMAN	GEMIN5	5	5	5	23.702	21.4132	2.28875
204	sp|O60573|IF4E2_HUMAN	EIF4E2	3	3	3	22.9981	20.7138	2.2843
205	sp|Q6PJT7|ZC3HE_HUMAN	ZC3H14	5	5	5	23.695	21.4128	2.28217
206	sp|Q96D71|REPS1_HUMAN	REPS1	2	2	2	21.9086	19.629	2.27959
207	sp|Q9NZN8|CNOT2_HUMAN	CNOT2	4	4	4	23.7302	21.4523	2.27798
208	sp|Q96T51|RUFY1_HUMAN	RUFY1	3	3	3	22.9865	20.7169	2.26959
209	sp|Q7Z589|EMSY_HUMAN	EMSY	12	12	12	25.7099	23.4866	2.22323
210	sp|Q9BUQ8|DDX23_HUMAN	DDX23	9	9	9	24.9675	22.7485	2.21892
211	sp|Q9UHD2|TBK1_HUMAN	TBK1	3	3	3	23.58	21.365	2.21502
212	sp|P61289|PSME3_HUMAN	PSME3	6	6	6	23.9308	21.743	2.18785
213	sp|A8MW92|P20L1_HUMAN	PHF20L1	2	2	2	21.9933	19.8142	2.17912
214	sp|Q15637|SF01_HUMAN	SF1	3	3	3	24.3262	22.1857	2.14048
215	sp|Q9BRT8|CBWD1_HUMAN	CBWD1	2	2	2	21.7317	19.5933	2.1384
216	sp|Q8IUF1|CBWD2_HUMAN	CBWD2	2	2	2	21.7317	19.5933	2.1384
217	sp|Q5RIA9|CBWD5_HUMAN	CBWD5	2	2	2	21.7317	19.5933	2.1384
218	sp|Q5JTY5|CBWD3_HUMAN	CBWD3	2	2	2	21.7317	19.5933	2.1384
219	sp|Q4V339|CBWD6_HUMAN	CBWD6	2	2	2	21.7317	19.5933	2.1384
220	sp|Q9Y5K5|UCHL5_HUMAN	UCHL5	4	4	4	22.971	20.8454	2.1256
221	sp|Q8NFF5|FAD1_HUMAN	FLAD1	2	2	2	22.3639	20.2533	2.11059
222	sp|P46060|RAGP1_HUMAN	RANGAP1	20	20	20	27.2563	25.1637	2.09263
223	sp|P55884|EIF3B_HUMAN	EIF3B	4	4	4	22.8027	20.7378	2.06491
224	sp|P52732|KIF11_HUMAN	KIF11	6	6	6	24.3504	22.2863	2.06416
225	sp|Q8WXF1|PSPC1_HUMAN	PSPC1	5	5	5	25.0125	22.9508	2.06169
226	sp|O76031|CLPX_HUMAN	CLPX	3	3	3	22.7801	20.7247	2.05539
227	sp|P26196|DDX6_HUMAN	DDX6	19	19	19	27.4937	25.4457	2.04804
228	sp|P33981|TTK_HUMAN	TTK	6	6	6	23.6233	21.5993	2.02405
229	sp|P51116|FXR2_HUMAN	FXR2	6	4	4	23.7694	21.7756	1.99386
230	sp|Q6UVJ0|SAS6_HUMAN	SASS6	3	3	3	23.0805	21.0931	1.98735
231	sp|Q14152|EIF3A_HUMAN	EIF3A	10	10	10	24.4689	22.4829	1.98595
232	sp|P11388|TOP2A_HUMAN	TOP2A	2	2	2	21.4949	19.5151	1.97985
233	sp|Q02880|TOP2B_HUMAN	TOP2B	2	2	2	21.4949	19.5151	1.97985
234	sp|Q9UBB9|TFP11_HUMAN	TFIP11	3	3	3	23.1444	21.1774	1.96702
235	sp|Q8TAQ2|SMRC2_HUMAN	SMARCC2	9	2	2	23.0007	21.0658	1.93486
236	sp|Q15437|SC23B_HUMAN	SEC23B	14	12	12	25.3629	23.4354	1.92743
237	sp|Q01780|EXOSX_HUMAN	EXOSC10	15	15	15	25.7516	23.8308	1.9208
238	sp|Q8WUM0|NU133_HUMAN	NUP133	7	7	7	24.6253	22.7256	1.89967
239	sp|Q9ULK4|MED23_HUMAN	MED23	26	26	26	26.9893	25.0943	1.89504
240	sp|Q10570|CPSF1_HUMAN	CPSF1	5	5	5	23.5022	21.6315	1.87063
241	sp|Q2NKX8|ERC6L_HUMAN	ERCC6L	5	5	5	22.3382	20.4724	1.8658
242	sp|Q12824|SNF5_HUMAN	SMARCB1	4	4	4	23.9121	22.0517	1.86045
243	sp|O95801|TTC4_HUMAN	TTC4	3	3	3	22.8255	20.9687	1.85673
244	sp|Q9UMZ2|SYNRG_HUMAN	SYNRG	9	9	9	25.185	23.3321	1.85292
245	sp|Q9Y3B4|SF3B6_HUMAN	SF3B6	4	4	4	24.3595	22.5089	1.8506
246	sp|O43809|CPSF5_HUMAN	NUDT21	7	7	7	24.4328	22.5896	1.8432
247	sp|Q9UBC2|EP15R_HUMAN	EPS15L1	3	3	3	22.7603	20.9178	1.84248
248	sp|Q13573|SNW1_HUMAN	SNW1	5	5	5	24.0146	22.1767	1.83791
249	sp|Q9NQS7|INCE_HUMAN	INCENP	6	6	6	23.6546	21.8238	1.83082
250	sp|P49959|MRE11_HUMAN	MRE11	11	11	11	25.2542	23.4246	1.82964
251	sp|Q9HBM6|TAF9B_HUMAN	TAF9B	8	3	3	23.8027	22.0404	1.76233
252	sp|Q9Y265|RUVB1_HUMAN	RUVBL1	21	21	21	27.676	25.9146	1.76141
253	sp|Q14161|GIT2_HUMAN	GIT2	4	4	3	22.7637	21.0118	1.75191
254	sp|Q8IX90|SKA3_HUMAN	SKA3	8	8	8	25.0535	23.3259	1.72755
255	sp|O95163|ELP1_HUMAN	ELP1	12	12	12	25.5991	23.9126	1.68652
256	sp|Q99873|ANM1_HUMAN	PRMT1	6	6	6	24.4153	22.7338	1.68149
257	sp|P05166|PCCB_HUMAN	PCCB	10	10	10	25.3889	23.7191	1.6698
258	sp|Q9Y5B9|SP16H_HUMAN	SUPT16H	7	7	7	22.775	21.106	1.66902
259	sp|Q9NUQ3|TXLNG_HUMAN	TXLNG	4	4	4	22.97	21.3032	1.66675
260	sp|P53350|PLK1_HUMAN	PLK1	12	12	12	25.0588	23.4003	1.65851
261	sp|Q9BRT6|LLPH_HUMAN	LLPH	5	5	5	26.0135	24.357	1.65646
262	sp|Q9UI26|IPO11_HUMAN	IPO11	3	3	3	22.1088	20.4687	1.64007
263	sp|P37840|SYUA_HUMAN	SNCA	5	5	5	25.397	23.7608	1.63618
264	sp|O95985|TOP3B_HUMAN	TOP3B	11	11	11	24.1983	22.5661	1.63219
265	sp|O95793|STAU1_HUMAN	STAU1	4	4	4	22.7185	21.0874	1.63101
266	sp|Q92621|NU205_HUMAN	NUP205	4	4	4	22.5952	20.9787	1.61648
267	sp|Q9BT25|HAUS8_HUMAN	HAUS8	2	2	2	22.4765	20.8626	1.61388
268	sp|Q92620|PRP16_HUMAN	DHX38	6	6	6	23.1469	21.5365	1.61036
269	sp|Q9UPN9|TRI33_HUMAN	TRIM33	7	7	7	24.1708	22.5858	1.58497
270	sp|Q9UKK9|NUDT5_HUMAN	NUDT5	3	3	3	22.8954	21.3108	1.58465
271	sp|Q15029|U5S1_HUMAN	EFTUD2	30	29	29	27.3278	25.7766	1.55122
272	sp|P04183|KITH_HUMAN	TK1	3	3	3	23.4418	21.8953	1.5465
273	sp|Q7Z4H7|HAUS6_HUMAN	HAUS6	7	7	7	24.6432	23.1027	1.54048
274	sp|Q14678|KANK1_HUMAN	KANK1	3	3	3	23.4148	21.883	1.53176
275	sp|P49736|MCM2_HUMAN	MCM2	5	5	5	23.042	21.5371	1.50495
276	sp|P51610|HCFC1_HUMAN	HCFC1	34	34	34	28.5852	27.084	1.50128
277	sp|O75533|SF3B1_HUMAN	SF3B1	22	22	22	26.6221	25.1237	1.4984
278	sp|Q00341|VIGLN_HUMAN	HDLBP	14	14	14	25.7705	24.2765	1.49398
279	sp|Q9NYF8|BCLF1_HUMAN	BCLAF1	3	3	3	22.6269	21.1443	1.48252
280	sp|Q13868|EXOS2_HUMAN	EXOSC2	4	4	4	23.2225	21.7502	1.47229
281	sp|O60506|HNRPQ_HUMAN	SYNCRIP	5	5	3	23.2791	21.811	1.46805
282	sp|Q8NCA5|FA98A_HUMAN	FAM98A	3	3	3	23.8311	22.3672	1.46396
283	sp|Q9HCS7|SYF1_HUMAN	XAB2	10	10	10	24.9597	23.4967	1.46297
284	sp|O75446|SAP30_HUMAN	SAP30	2	2	2	22.4927	21.0336	1.45917
285	sp|Q4VCS5|AMOT_HUMAN	AMOT	14	14	14	25.6773	24.2272	1.45012
286	sp|Q9UNF1|MAGD2_HUMAN	MAGED2	6	5	5	23.0648	21.6351	1.42969
287	sp|Q7Z7C8|TAF8_HUMAN	TAF8	3	3	3	24.0231	22.5984	1.42468
288	sp|P19338|NUCL_HUMAN	NCL	4	4	4	22.9759	21.5808	1.39517
289	sp|O00186|STXB3_HUMAN	STXBP3	6	6	6	23.1009	21.7185	1.38241
290	sp|O43482|MS18B_HUMAN	OIP5	2	2	2	23.2605	21.8953	1.36528
291	sp|Q8IWX8|CHERP_HUMAN	CHERP	13	13	13	26.0383	24.6875	1.35084
292	sp|Q92804|RBP56_HUMAN	TAF15	3	3	2	22.4887	21.15	1.33871
293	sp|Q96II8|LRCH3_HUMAN	LRCH3	2	2	2	21.1708	19.8339	1.33695
294	sp|Q9Y2L9|LRCH1_HUMAN	LRCH1	2	2	2	21.1708	19.8339	1.33695
295	sp|Q15382|RHEB_HUMAN	RHEB	7	7	7	25.5356	24.2053	1.33027
296	sp|P54132|BLM_HUMAN	BLM	11	11	11	24.6276	23.2999	1.32764
297	sp|Q13283|G3BP1_HUMAN	G3BP1	9	9	8	25.7479	24.4259	1.32208
298	sp|Q86UK7|ZN598_HUMAN	ZNF598	4	4	4	22.6164	21.302	1.31435
299	sp|P11940|PABP1_HUMAN	PABPC1	23	23	14	28.5512	27.2425	1.30869
300	sp|P35579|MYH9_HUMAN	MYH9	7	5	5	22.6509	21.3551	1.29578
301	sp|Q15048|LRC14_HUMAN	LRRC14	2	2	2	20.5839	19.2953	1.2886
302	sp|Q96I25|SPF45_HUMAN	RBM17	8	8	8	24.4961	23.2333	1.26281
303	sp|P35244|RFA3_HUMAN	RPA3	3	3	3	22.9879	21.7425	1.24535
304	sp|Q9Y314|NOSIP_HUMAN	NOSIP	5	5	5	24.6616	23.4162	1.24533
305	sp|Q5SRE5|NU188_HUMAN	NUP188	5	5	5	22.2524	21.0072	1.24513
306	sp|O15397|IPO8_HUMAN	IPO8	4	3	3	21.4307	20.1858	1.24494
307	sp|Q15393|SF3B3_HUMAN	SF3B3	25	25	25	27.4953	26.2716	1.22372
308	sp|P31350|RIR2_HUMAN	RRM2	4	4	4	24.4456	23.2226	1.223
309	sp|P05165|PCCA_HUMAN	PCCA	21	21	21	27.2776	26.0576	1.22007
310	sp|O15235|RT12_HUMAN	MRPS12	3	3	3	24.1395	22.9343	1.20529
311	sp|Q53EZ4|CEP55_HUMAN	CEP55	3	3	3	22.5894	21.394	1.19538
312	sp|P11177|ODPB_HUMAN	PDHB	8	8	8	25.0537	23.8664	1.18729
313	sp|O94906|PRP6_HUMAN	PRPF6	12	12	12	25.4982	24.3138	1.18441
314	sp|Q96C24|SYTL4_HUMAN	SYTL4	7	7	7	24.4396	23.2598	1.17979
315	sp|Q7L576|CYFP1_HUMAN	CYFIP1	4	4	4	22.3596	21.1888	1.17073
316	sp|Q92890|UFD1_HUMAN	UFD1	3	3	3	22.4624	21.2943	1.16804
317	sp|P39656|OST48_HUMAN	DDOST	2	2	2	21.7212	20.5637	1.15752
318	sp|Q9BPX3|CND3_HUMAN	NCAPG	13	13	13	24.7761	23.6339	1.14216
319	sp|Q9NYP9|MS18A_HUMAN	MIS18A	4	4	4	24.9331	23.7911	1.14191
320	sp|Q9NVA2|SEP11_HUMAN	SEPTIN11	4	4	4	23.8844	22.7464	1.13792
321	sp|Q86U86|PB1_HUMAN	PBRM1	2	2	2	21.2355	20.0982	1.13734
322	sp|P30876|RPB2_HUMAN	POLR2B	7	7	7	23.5005	22.3654	1.13507
323	sp|Q9Y230|RUVB2_HUMAN	RUVBL2	21	21	21	27.2253	26.092	1.13324
324	sp|Q9BSJ2|GCP2_HUMAN	TUBGCP2	2	2	2	20.4839	19.354	1.12991
325	sp|Q96DT7|ZBT10_HUMAN	ZBTB10	5	5	5	23.5216	22.392	1.12952
326	sp|P82912|RT11_HUMAN	MRPS11	3	3		21.9638	20.8486	1.11523
327	sp|Q13325|IFIT5_HUMAN	IFIT5	5	5	5	23.4817	22.3869	1.0948
328	sp|P61758|PFD3_HUMAN	VBP1	2	2	2	22.5458	21.4518	1.09399
329	sp|Q15018|ABRX2_HUMAN	ABRAXAS2	3	3	3	23.1646	22.0964	1.06813
330	sp|O75934|SPF27_HUMAN	BCAS2	2	2	2	22.9793	21.9113	1.06802
331	sp|Q92499|DDX1_HUMAN	DDX1	22	22	22	26.4318	25.3668	1.06495
332	sp|Q5T7W7|TSTD2_HUMAN	TSTD2	6	6	6	23.2578	22.2115	1.04636
333	sp|Q9UI30|TR112_HUMAN	TRMT112	3	3	3	23.9382	22.8934	1.04487
334	sp|P54646|AAPK2_HUMAN	PRKAA2	3	3	3	22.6127	21.58	1.03267
335	sp|Q13131|AAPK1_HUMAN	PRKAA1	3	3	3	22.6127	21.58	1.03267
336	sp|Q9NV56|MRGBP_HUMAN	MRGBP	2	2	2	22.0908	21.0727	1.01817
