# Supplementary material for: Tissue-specific O-GlcNAcylation profiling identifies substrates in translational machinery in Drosophila mushroom body contributing to olfactory learning
Source: eLife. 2024 Apr 15;13:e91269. doi: 10.7554/eLife.91269 (PMC11018347; doi:10.7554/eLife.91269)
Supplement: Supplementary file 2. [file elife-91269-supp2.xlsx]

## Sheet: Sheet1
Previously identified O-GlcNAcylated proteins from HEK293T cells
Direct capture methods		Chemoenzymatic labeling methods
NO.	Gene Symbol	NO.	Gene Symbol
1	PIPSL	1	PGP
2	ARID1A	2	EIF3CL
3	TCERG1	3	KIF2A
4	PPP1R12A	4	PDLIM1
5	HNRNPDL	5	ACOT7
6	SETD1A	6	DFFA
7	OGT	7	CLIC1
8	RNMT	8	EIF3F
9	HNRNPR	9	IGF2BP3
10	ZNF207	10	RTCA
11	SYNCRIP	11	PSMD14
12	DNAJA2	12	PPP6C
13	CSDE1	13	POLR3A
14	NPM3	14	PSMA7
15	EIF3G	15	HNRNPDL
16	EIF3J	16	SEC16A
17	KLF7	17	POLR1C
18	CCNK	18	NKRF
19	DNAJC8	19	EIF3H
20	SEC31A	20	PAPSS1
21	HPRT1	21	SART1
22	ALDOA	22	AKR7A2
23	ANXA1	23	MYO1B
24	TUBB4A	24	IDH3B
25	GAPDH	25	AHCYL1
26	S100A8	26	PLIN3
27	RPLP2	27	KPNA6
28	S100A9	28	UGDH
29	NPM1	29	CTNND1
30	LDHB	30	SNX2
31	PFN1	31	BRD4
32	EPRS1	32	WDR1
33	HNRNPC	33	TBCA
34	SP1	34	FLNB
35	HSP90AB1	35	PRPF40A
36	VIM	36	PMPCB
37	GSTP1	37	NDUFS3
38	HMGB1	38	ECI2
39	HNRNPA1	39	CSDE1
40	HSPA1A	40	SNRNP200
41	HSPA1B	41	WDHD1
42	H1-4	42	EIF3G
43	TXN	43	PSMD10
44	PABPC1	44	IDH1
45	IMPDH2	45	GLRX3
46	EEF2	46	RSL1D1
47	PKM	47	CIAO1
48	POU2F1	48	PLPBP
49	HNRNPL	49	ERLIN2
50	HIVEP1	50	GLS
51	H1-5	51	SEC31A
52	H1-3	52	UBR5
53	H1-2	53	ELP1
54	STMN1	54	VAPB
55	RPL17	55	PGLS
56	NCL	56	PGM3
57	TRIM21	57	AHSA1
58	CSNK2A2	58	PSMG1
59	PAICS	59	SGPL1
60	HNRNPA2B1	60	AP2A1
61	SFPQ	61	STAU1
62	PPIB	62	TTC4
63	AHCY	63	BPNT1
64	CFL1	64	MBD3
65	RPL13	65	TOMM40
66	PTBP1	66	ACTL6A
67	RPL10	67	GSR
68	RPA1	68	PNP
69	MAP4	69	CSTB
70	PEBP1	70	TK1
71	PPIF	71	TP53
72	S100A7	72	TPM3
73	DNAJA1	73	PFN1
74	PRDX2	74	FH
75	RPL9	75	PDHA1
76	RPL9P7	76	CYC1
77	RPL9P8	77	SRP19
78	RPL9P9	78	DLD
79	HSPA4	79	SNRPA1
80	MYH9	80	UCHL1
81	MYH10	81	ALDOC
82	NUP214	82	TXN
83	RPL4	83	PRKAR1A
84	NUP62	84	ESD
85	RBMX	85	PDHB
86	RPS19	86	PYGB
87	RANBP1	87	ACADM
88	MKI67	88	G6PD
89	RPL27A	89	ADH5
90	RPL21	90	CDK4
91	RPL28	91	HARS1
92	GYG1	92	PEPD
93	SERPINB4	93	P4HA1
94	PRRC2A	94	ETFA
95	SRP9	95	MIF
96	YLPM1	96	AKR1A1
97	NUP153	97	CCNB1
98	CCT8	98	GLUL
99	HCFC1	99	DSP
100	HNRNPA3	100	FER
101	AGFG1	101	UBTF
102	NUP98	102	PSMC3
103	SEC24C	103	RPL35A
104	ATN1	104	NELFE
105	HSPA2	105	RCC1
106	SEC13	106	EIF2AK2
107	TPI1	107	SRM
108	ACTB	108	ANXA7
109	RPL26	109	RAB6A
110	HSPE1	110	PSMB1
111	RPL37	111	IMPDH1
112	WDR5	112	GSTM3
113	RPS16	113	ATP6V1B2
114	RPS18	114	FLNA
115	SNRPD2	115	SDHB
116	SNRPD3	116	PCMT1
117	CNBP	117	FBL
118	RPS6	118	NME2
119	PPIA	119	FDXR
120	RACK1	120	TCEA1
121	YBX1	121	TUBG1
122	CSNK2B	122	ME2
123	EEF1A1	123	EIF4B
124	TUBA1B	124	MPST
125	RAE1	125	RPS12
126	RPL24	126	BRD2
127	HNRNPU	127	DNAJB1
128	EWSR1	128	PSMA1
129	RPL18A	129	PSMA2
130	KMT2A	130	PSMA4
131	RING1	131	STOM
132	PRDX1	132	CAD
133	RBBP4	133	PSMB4
134	BPTF	134	PSMB6
135	ILF3	135	NDUFS1
136	HNRNPA0	136	POLD1
137	PSMD2	137	LAP3
138	G3BP1	138	ERP29
139	PABPC4	139	PRDX3
140	EIF3I	140	ECHS1
141	HDAC1	141	PEBP1
142	NACA	142	PDIA3
143	CIRBP	143	HMOX2
144	HNRNPD	144	ADSS2
145	VEZF1	145	ADSL
146	UBAP2L	146	ALDH1B1
147	FHL2	147	POLR2B
148	CAPRIN1	148	GDI1
149	RRP1B	149	TIA1
150	KPNB1	150	UQCRC1
151	NOLC1	151	HNRNPH3
152	KARS1	152	STIP1
153	NONO	153	PRDX2
154	SEC23A	154	PYCR1
155	SEC23B	155	DUT
156	SF1	156	PFN2
157	JMJD1C	157	SERPINB6
158	ELAVL1	158	RDX
159	QSER1	159	GTF2F1
160	FAM98B	160	MYH9
161	UBAP2	161	MYH10
162	RBM26	162	FUS
163	LIN54	163	PSMC2
164	NFRKB	164	MAP2K2
165	NUP54	165	CPOX
166	NUFIP2	166	GNL1
167	EMSY	167	DLST
168	YTHDF3	168	SRP14
169	TAF8	169	TALDO1
170	CARM1	170	ETFB
171	ANKHD1	171	ATP6V1A
172	CCAR1	172	EIF4A3
173	ACBD7	173	TXLNA
174	SERBP1	174	BUD31
175	FAM98A	175	CSK
176	PHC3	176	ACAA2
177	ARID1B	177	PAFAH1B1
178	B4GALNT2	178	NAMPT
179	C15orf40	179	PSMC4
180	ATXN2L	180	RECQL
181	BAP1	181	NOP2
182	TFG	182	CRKL
183	SMARCC1	183	NSF
184	RPL36AL	184	CAPZB
185	FUBP1	185	ARCN1
186	ZFR	186	IDH2
187	PRRC1	187	ALDH9A1
188	RBM14	188	RPL34
189	PHF12	189	FASN
190	CIC	190	CARS1
191	RNF2	191	PSMB3
192	NUP88	192	IDH3A
193	ATXN2	193	SERPINH1
194	DIDO1	194	ANXA11
195	NUP58	195	FXR1
196	YTHDF1	196	FXR2
197	WNK3	197	SMARCA4
198	NAA50	198	GALK1
199	WNK1	199	HNRNPA3
200	ASIC5	200	HNRNPM
201	CDK12	201	KPNA1
202	UBP1	202	ARHGDIA
203	KANSL3	203	HNRNPF
204	ASH2L	204	KIF11
205	DDX41	205	THOP1
206	NUP50	206	CAPZA1
207	YEATS2	207	BLVRA
208	STRAP	208	METAP1
209	WNK2	209	SUCLG1
210	RAD54L2	210	SEC24C
211	PRRC2C	211	DRG2
212	SEC23IP	212	HADHB
213	POM121C	213	ADAR
214	MCRIP1	214	HNRNPH2
215	ANKRD17	215	EIF6
216	SEC24B	216	CORO7
217	TXNDC12	217	ARPC4
218	ENO1	218	CD81
219	HSPA8	219	SEC61B
220	ENO3	220	MYL6
221	RPS2	221	PSMA6
222	PCMT1	222	CDC42
223	EEF1B2	223	SRP54
224	RPS12	224	UBE2D3
225	DDX6	225	UBE2M
226	ERP29	226	ACTR3
227	RPL12	227	RPL37A
228	RPL22	228	COPZ1
229	FUS	229	NUTF2
230	SRP14	230	YWHAG
231	HSPA9	231	PPP1CA
232	RPL5	232	PPP1CB
233	RPL29	233	SNRPD2
234	RPL34	234	PSMC6
235	CCT4	235	ETF1
236	RPS20	236	CNBP
237	RPS7	237	H4-16
238	RPS14	238	H4C1
239	RPS23	239	H4C11
240	RPS11	240	H4C12
241	RPL23A	241	H4C13
242	RAN	242	H4C14
243	RPL23	243	H4C15
244	RPL31	244	H4C2
245	RPL11	245	H4C3
246	RPL8	246	H4C4
247	RPL36A	247	H4C5
248	C1QBP	248	H4C6
249	KHDRBS1	249	H4C8
250	AIMP1	250	H4C9
251	CBX3	251	RAP1A
252	RBBP5	252	FAU
253	LSM12	253	GNB1
254	USP39	254	GNB2
255	SPACA3	255	TRA2B
256	ASXL1	256	PPP2R2A
257	BAP18	257	DYNLL1
258	SMARCC2	258	RPL38
259	DDX1	259	PPP2CA
260	HSPH1	260	TUBA1B
261	DDX17	261	GSTO1
262	KHSRP	262	DCD
263	ZC3H10	263	MRPS5
264	HNRNPAB	264	MRPS9
265	TBL1XR1	265	RPL36A
266	DMAP1	266	H3-3A
267	DDX21	267	H3-3B
268	BCLAF1	268	HDLBP
269	RTRAF	269	FKBP3
270	RUVBL2	270	SORD
271	RUVBL1	271	EXOSC10
272	ATP8A1	272	OGDH
273	RTCB	273	ALDH6A1
		274	RELA
		275	GLO1
		276	YWHAH
		277	CSTF1
		278	SRSF11
		279	EEF1A2
		280	PTPN11
		281	PPAT
		282	GFPT1
		283	C1QBP
		284	BAX
		285	SRSF4
		286	RBBP4
		287	ASPH
		288	GRSF1
		289	AIMP1
		290	ILF3
		291	GPS1
		292	IK
		293	MTAP
		294	TARDBP
		295	HNRNPA0
		296	STX5
		297	SRSF9
		298	SRSF5
		299	IFIT5
		300	EIF3I
		301	DYNC1I2
		302	PICALM
		303	NAE1
		304	SNW1
		305	FHL1
		306	BOP1
		307	UBAP2L
		308	DYNC1H1
		309	EIF2B1
		310	TRIM25
		311	FLNC
		312	GNA13
		313	CAPRIN1
		314	PRPSAP1
		315	USP10
		316	CHD4
		317	NUMA1
		318	GAPVD1
		319	EMC2
		320	SEPTIN2
		321	EIF4H
		322	PPA1
		323	CNN3
		324	SEC23B
		325	SF1
		326	TRIP6
		327	MAPRE1
		328	ELAVL1
		329	TOMM34
		330	VAMP3
		331	ADRM1
		332	PKN2
		333	CSRP2
		334	DPYSL2
		335	RBBP7
		336	H2BC21
		337	PCK2
		338	TXNRD1
		339	TIMM50
		340	FAM98B
		341	ZNF326
		342	PITRM1
		343	RRP12
		344	AARS2
		345	EXOSC6
		346	IBA57
		347	UBR4
		348	NT5DC1
		349	PDE12
		350	JMJD6
		351	CDC73
		352	EDC4
		353	PRPF8
		354	RPL22L1
		355	DARS2
		356	GIGYF2
		357	HSDL2
		358	TRMT10C
		359	ZC3HAV1
		360	DHX29
		361	DCXR
		362	HUWE1
		363	ACOT1
		364	KTN1
		365	CARM1
		366	STX12
		367	HRNR
		368	FTSJ3
		369	SRRM1
		370	SUPV3L1
		371	TXNDC5
		372	SCCPDH
		373	FAM98A
		374	LPCAT1
		375	FLAD1
		376	UBA3
		377	NEK9
		378	BRIX1
		379	ZC3H15
		380	SCFD1
		381	HNRNPLL
		382	ATXN2L
		383	PSPC1
		384	GATAD2B
		385	DNAJC9
		386	DDX1
		387	H1-10
		388	PSMF1
		389	MRPS27
		390	LARP4B
		391	ARPC1A
		392	UPF1
		393	FUBP1
		394	PYCR2
		395	TRMT61A
		396	ZC3HAV1L
		397	PGAM5
		398	FUBP3
		399	RBM17
		400	THOC3
		401	ZFR
		402	SNX27
		403	RBM14
		404	TP53RK
		405	TBCB
		406	CDC5L
		407	PARK7
		408	HSD17B10
		409	HNRNPAB
		410	EBNA1BP2
		411	VRK1
		412	NIPSNAP1
		413	WDR77
		414	TUBA1C
		415	ERP44
		416	NTPCR
		417	DDX23
		418	MRI1
		419	NTMT1
		420	TMEM109
		421	TARS2
		422	ACAT2
		423	RBM4
		424	HDHD5
		425	ITPA
		426	EIF2A
		427	POLDIP3
		428	NIFK
		429	GTPBP4
		430	UPF3B
		431	API5
		432	UBE2O
		433	WDR12
		434	SLIRP
		435	NAA50
		436	ILKAP
		437	SLK
		438	PNN
		439	YTHDC2
		440	RPF2
		441	QTRT2
		442	ARMT1
		443	COPS7B
		444	ELP3
		445	FN3KRP
		446	MRM3
		447	GLOD4
		448	MCCC2
		449	CWC22
		450	WDR6
		451	VTA1
		452	EXOSC4
		453	ISYNA1
		454	LUC7L
		455	TIGAR
		456	XPNPEP1
		457	NANS
		458	PHPT1
		459	HELLS
		460	ECHDC1
		461	RBM12
		462	DDX19A
		463	SEPTIN11
		464	TBC1D13
		465	ATAD3A
		466	DDX18
		467	PNPO
		468	RBM28
		469	LYAR
		470	DPP3
		471	BCLAF1
		472	FAM120A
		473	HSPBP1
		474	MAT2B
		475	RRBP1
		476	GMPR2
		477	GRHPR
		478	TES
		479	CHORDC1
		480	SEPTIN9
		481	EIF2B4
		482	DBNL
		483	DDX41
		484	ANAPC7
		485	STOML2
		486	MRTO4
		487	ACIN1
		488	NUP50
		489	PSME2
		490	MYO6
		491	STUB1
		492	COPS3
		493	SRRM2
		494	CDK11A
		495	SMC3
		496	RTRAF
		497	PIN4
		498	PLAA
		499	NUDC
		500	CFL2
		501	AP3M1
		502	THRAP3
		503	NOP58
		504	SUGT1
		505	YARS2
		506	SBDS
		507	EXOSC1
		508	SF3B6
		509	RRP15
		510	MRPS23
		511	STRAP
		512	CHTOP
		513	SAMHD1
		514	TLN1
		515	HYOU1
		516	ATG4B
		517	TBL2
		518	PRRC2C
		519	PPME1
		520	YTHDF2
		521	SNX9
		522	PSAT1
		523	CLIC4
		524	DYNC1LI1
		525	SEC23IP
		526	POM121C
		527	PSMD11
		528	PSMD12
		529	PGRMC1
		530	DDX3X
		531	IRS4
		532	PFAS
		533	ARPC3
		534	PSMD3
		535	EIF4G3
		536	ACTN4
		537	CPNE3
		538	NDUFS7
		539	SEC22B
		540	GNAS
		541	HSPA4L
		542	CYB5R3
		543	LMNA
		544	OAT
		545	RPN1
		546	JUN
		547	P4HB
		548	EPRS1
		549	ANXA6
		550	ASNS
		551	PABPC1
		552	IMPDH2
		553	LCP1
		554	HSP90B1
		555	NME1
		556	CTPS1
		557	TCP1
		558	GART
		559	SFPQ
		560	PPIB
		561	PSMA3
		562	TARS1
		563	RPL10
		564	MAP4
		565	CANX
		566	PRDX6
		567	MAT2A
		568	HOXA10
		569	DNAJA1
		570	ATIC
		571	HNRNPH1
		572	YWHAB
		573	RPL9
		574	RPL9P7
		575	RPL9P8
		576	RPL9P9
		577	MCM7
		578	RPL22
		579	COPB2
		580	NUP214
		581	NUP62
		582	CCT6A
		583	RFC3
		584	EIF2S3
		585	GARS1
		586	ECI1
		587	LRPPRC
		588	MATR3
		589	RANGAP1
		590	RPL5
		591	QARS1
		592	AARS1
		593	NUP153
		594	TAF6
		595	GMPS
		596	CCT8
		597	HCFC1
		598	NUP98
		599	COPA
		600	RARS1
		601	ATP1B3
		602	RAD23B
		603	ALDH18A1
		604	CSE1L
		605	NPEPPS
		606	EIF3E
		607	DSTN
		608	UBE2N
		609	ABCE1
		610	PSMC5
		611	RPS18
		612	RPL23
		613	EIF4G2
		614	KRT85
		615	PRKDC
		616	SRSF3
		617	EWSR1
		618	MEF2A
		619	EIF4G1
		620	SRSF1
		621	SF3A3
		622	AIMP2
		623	CBX3
		624	NR5A1
		625	CUL4B
		626	DDX39B
		627	MCM6
		628	GANAB
		629	PDIA6
		630	ZYX
		631	CDC37
		632	AMOT
		633	HP1BP3
		634	UBAP2
		635	RBM26
		636	SND1
		637	POGZ
		638	PTOV1
		639	CCAR1
		640	CISD2
		641	NAXE
		642	PDCD6IP
		643	NDRG1
		644	HSPH1
		645	TFG
		646	DDX17
		647	KHSRP
		648	FKBP10
		649	PDLIM5
		650	VPS35
		651	PHB2
		652	TSG101
		653	CCT7
		654	NUP58
		655	NAA15
		656	PTPN23
		657	RNPEP
		658	PDLIM7
		659	IGF2BP1
		660	VAPA
		661	LARS1
		662	ATXN10
		663	SRP68
		664	CORO1C
		665	VDAC3
		666	DRG1
		667	DIS3
		668	UBA6
		669	SHTN1
		670	MEX3A
		671	TRAPPC13
		672	CNOT1
		673	SMCHD1
		674	CCDC85C
		675	EIF4E1B
		676	ZBBX
		677	ERVK3-1
		678	DDX39A
		679	GTPBP1
		680	SMAP
		681	AP3B1
		682	PSMD9
		683	ATOX1
		684	SUPT5H
		685	TAF4
		686	WASL
		687	IPO5
		688	EEF2K
		689	PLOD2
		690	MEIS1
		691	KPNA3
		692	BCL9
		693	SDCBP
		694	NOP56
		695	KPNA4
		696	ARID1A
		697	UBFD1
		698	CCS
		699	DVL2
		700	KMT2D
		701	PRMT5
		702	TNPO2
		703	GEMIN2
		704	HAT1
		705	PPP1R12A
		706	GAK
		707	XPO1
		708	ZNF609
		709	U2SURP
		710	ZNF185
		711	CASC3
		712	OGT
		713	PMM2
		714	HMGB3
		715	PPM1G
		716	INPPL1
		717	NVL
		718	NUP42
		719	RNF113A
		720	KDM6A
		721	DHX15
		722	RNMT
		723	RRP8
		724	PHGDH
		725	DYNC1LI2
		726	ZW10
		727	MAP3K7
		728	RIPK2
		729	WDR62
		730	TXNL1
		731	EPB41L2
		732	FOXO3
		733	DENR
		734	XPOT
		735	BUB3
		736	HTATSF1
		737	SGTA
		738	NARS1
		739	LANCL1
		740	DHX16
		741	ZNRD2
		742	PRPSAP2
		743	AQR
		744	MCM3AP
		745	SYNCRIP
		746	BUB1B
		747	DIAPH1
		748	PRMT3
		749	EIF1B
		750	USO1
		751	EIF5B
		752	NBN
		753	SRGAP2
		754	N4BP1
		755	ROCK2
		756	CLASP2
		757	RNF40
		758	ZC3H11A
		759	CLUH
		760	TSC22D2
		761	ANKRD17
		762	GGCT
		763	HMMR
		764	ATP6V1G1
		765	NCOR1
		766	SPAG7
		767	GIGYF1
		768	PSIP1
		769	SRSF10
		770	KHDRBS3
		771	SF3B1
		772	PRKRA
		773	RPS6KA5
		774	NPM3
		775	LYPLA1
		776	TIPRL
		777	OFD1
		778	CDC123
		779	BCAS2
		780	URI1
		781	TOX4
		782	SEC24D
		783	SUPT7L
		784	UBXN7
		785	NFAT5
		786	SOGA1
		787	USP19
		788	WDR47
		789	HEXIM1
		790	SCAF4
		791	UBE4B
		792	ZRANB2
		793	KIF4A
		794	SNAPIN
		795	SMC2
		796	ATG7
		797	IPO7
		798	ZFYVE9
		799	SVIL
		800	BAG4
		801	PARN
		802	SEC24A
		803	SEC24B
		804	ADGRL2
		805	TDP2
		806	PCNT
		807	YEATS4
		808	STAMBP
		809	ASMTL
		810	EYA4
		811	CEP43
		812	WIZ
		813	BAG2
		814	BAG3
		815	ECD
		816	BCL10
		817	MOCS2
		818	CHEK2
		819	HPRT1
		820	ADA
		821	CAPNS1
		822	HSPB1
		823	TYMS
		824	RPLP1
		825	SSB
		826	NPM1
		827	NEFL
		828	NEFM
		829	ANXA2
		830	HSP90AA1
		831	HNRNPC
		832	SP1
		833	SLC3A2
		834	HSP90AB1
		835	VIM
		836	GSTP1
		837	LGALS1
		838	HMGB1
		839	LTA4H
		840	H2AC11
		841	H2AC13
		842	H2AC15
		843	H2AC16
		844	H2AC17
		845	UBC
		846	GLI2
		847	DLAT
		848	LAMP1
		849	SRF
		850	PCNA
		851	SLC25A6
		852	ACTN1
		853	XRCC5
		854	LAMP2
		855	RNH1
		856	EEF2
		857	PLS3
		858	APEH
		859	PRKAR2A
		860	CD99
		861	PRKCSH
		862	PKM
		863	POU2F1
		864	DARS1
		865	AKR1B1
		866	GSPT1
		867	GNS
		868	HIVEP1
		869	CREB1
		870	GCFC2
		871	ATF7
		872	CAPN2
		873	SON
		874	ATF1
		875	NFKB1
		876	CAST
		877	COMT
		878	PAICS
		879	UBA1
		880	ENPP1
		881	CBL
		882	SP100
		883	NFYA
		884	AHCY
		885	CFL1
		886	TNC
		887	DNMT1
		888	CHML
		889	PTBP1
		890	YWHAQ
		891	RPA1
		892	APEX1
		893	PSMA5
		894	TPP2
		895	SHC1
		896	TKT
		897	PML
		898	MARCKS
		899	PRDX5
		900	CMPK1
		901	PPP2R1A
		902	PPP2R1B
		903	CDC27
		904	NMT1
		905	SDHA
		906	AKT1
		907	S100A11
		908	ARRB2
		909	DCTD
		910	GTF2H1
		911	KIF5B
		912	CSTF2
		913	TTK
		914	CA8
		915	RFC4
		916	RFC2
		917	HOXD13
		918	ADD1
		919	BSG
		920	DEK
		921	MYH11
		922	PPM1A
		923	ARL3
		924	RPL4
		925	NUDT1
		926	ZEB1
		927	TAGLN2
		928	COIL
		929	HSPA9
		930	STAT3
		931	PEX19
		932	RFC5
		933	NAA10
		934	KDM5C
		935	IARS1
		936	TMPO
		937	STAT1
		938	EPS15
		939	CASP3
		940	HTT
		941	MSH2
		942	GPD2
		943	RANBP1
		944	VDAC2
		945	CBX5
		946	USP5
		947	MAPK9
		948	MKI67
		949	ATRX
		950	RPL21
		951	MAP1B
		952	IQGAP1
		953	GYG1
		954	ID4
		955	ZFP36L2
		956	PREP
		957	RFX5
		958	GCLM
		959	PRRC2A
		960	NES
		961	RPIA
		962	NASP
		963	ARRB1
		964	CENPF
		965	SRP9
		966	PCYT1A
		967	SARS1
		968	PSMB2
		969	ACOT2
		970	RBM25
		971	NUMB
		972	RANBP2
		973	MRE11
		974	PDLIM4
		975	VASP
		976	METAP2
		977	LRBA
		978	CCT4
		979	RAB5C
		980	DUSP3
		981	IRAK1
		982	USP11
		983	HDGF
		984	PGD
		985	KPNA2
		986	RAP1GDS1
		987	AGFG1
		988	GTF2A1
		989	MSH6
		990	ZNF143
		991	HK2
		992	PPP5C
		993	ARFIP2
		994	NUBP1
		995	ACLY
		996	COPB1
		997	HCCS
		998	CLNS1A
		999	YARS1
		1000	PRKAA2
		1001	BCAT1
		1002	AK2
		1003	EIF5
		1004	VCP
		1005	AFDN
		1006	MLLT6
		1007	ADK
		1008	PKNOX1
		1009	GFER
		1010	EIF3B
		1011	BID
		1012	RRP1
		1013	GEMIN4
		1014	EPPK1
		1015	MTPN
		1016	TPI1
		1017	ACTB
		1018	EIF4A1
		1019	RPS20
		1020	PRPS1
		1021	S100A10
		1022	COPS2
		1023	RPS3A
		1024	PSME3
		1025	MAGOH
		1026	VBP1
		1027	HNRNPK
		1028	RPS15A
		1029	SNRPF
		1030	PPIA
		1031	RPS27A
		1032	AP2B1
		1033	YWHAZ
		1034	SKP1
		1035	EIF5A
		1036	RACK1
		1037	UBE2I
		1038	UBE2L3
		1039	ACTA1
		1040	CSNK2A1
		1041	PAFAH1B2
		1042	IGBP1
		1043	GTF2I
		1044	PIP4K2B
		1045	CCT2
		1046	RAE1
		1047	TMF1
		1048	RPL19
		1049	MXRA7
		1050	FOXK1
		1051	XIAP
		1052	TFAM
		1053	PURA
		1054	CDC42EP1
		1055	CLTC
		1056	NFKB2
		1057	U2AF1
		1058	FOXK2
		1059	AMPD2
		1060	DR1
		1061	TFAP4
		1062	OTUD4
		1063	CDR2
		1064	TOP2B
		1065	AKAP12
		1066	KMT2A
		1067	UBXN1
		1068	KRT17
		1069	REL
		1070	UBE3A
		1071	PTPN12
		1072	CALD1
		1073	PSME1
		1074	GABPA
		1075	RING1
		1076	FMR1
		1077	KHDRBS1
		1078	KLC1
		1079	DHX9
		1080	GOLGA2
		1081	LGALS3BP
		1082	SSRP1
		1083	VAC14
		1084	NSUN2
		1085	NCBP1
		1086	AHNAK
		1087	HSPA14
		1088	SCRN1
		1089	NUP160
		1090	FOXO1
		1091	TBL3
		1092	TFCP2
		1093	SFSWAP
		1094	TP53BP1
		1095	ELAVL2
		1096	TRAP1
		1097	FOXC1
		1098	TAF10
		1099	NFATC3
		1100	CSTF3
		1101	USP4
		1102	CHAF1A
		1103	PPFIA1
		1104	FADD
		1105	PRDX4
		1106	STK3
		1107	PSMD2
		1108	SELENBP1
		1109	SRSF6
		1110	TRIM28
		1111	PABPC4
		1112	PDCL
		1113	UBE2V1
		1114	PPIG
		1115	TCOF1
		1116	GOLGA4
		1117	FKBP5
		1118	GAB1
		1119	EIF4EBP1
		1120	EIF4EBP2
		1121	RIPK1
		1122	HDAC1
		1123	CAMK2B
		1124	DCTN2
		1125	SNX1
		1126	PWP1
		1127	CUL2
		1128	DYRK1A
		1129	AAMP
		1130	BLMH
		1131	CKAP5
		1132	DAG1
		1133	UBE4A
		1134	KEAP1
		1135	SAFB2
		1136	SCRIB
		1137	TTLL12
		1138	POLA2
		1139	WRN
		1140	DPYSL3
		1141	NPAT
		1142	CTTN
		1143	FRG1
		1144	SLBP
		1145	PUM1
		1146	MDC1
		1147	SMC1A
		1148	RRP1B
		1149	NCOA6
		1150	PPP2R5D
		1151	MEF2D
		1152	NFATC4
		1153	ZNF638
		1154	KPNB1
		1155	NAA25
		1156	NCAPH
		1157	WTAP
		1158	NCAPD2
		1159	EXOSC7
		1160	EFTUD2
		1161	R3HDM1
		1162	RAB3GAP1
		1163	SETDB1
		1164	RRS1
		1165	WDR43
		1166	PLEC
		1167	PCM1
		1168	PTGES3
		1169	NONO
		1170	RBBP5
		1171	LLGL1
		1172	PCBP1
		1173	ELOB
		1174	SF3B3
		1175	RPS6KA1
		1176	SAFB
		1177	SF3B4
		1178	SEC23A
		1179	SF3A1
		1180	SKIV2L
		1181	TCEA2
		1182	NCOA2
		1183	TSN
		1184	TARBP2
		1185	TRIP13
		1186	MED1
		1187	ELF2
		1188	TAB1
		1189	SLC1A5
		1190	SMAD2
		1191	TBCE
		1192	UAP1
		1193	E2F4
		1194	INA
		1195	DDB1
		1196	SMN1
		1197	SMN2
		1198	DBN1
		1199	NRF1
		1200	KNOP1
		1201	HNRNPUL2
		1202	INF2
		1203	PDS5A
		1204	QSER1
		1205	CLEC16A
		1206	ERCC6L
		1207	IAH1
		1208	QRICH1
		1209	CTU2
		1210	LRRFIP1
		1211	HNRNPA1L2
		1212	POLR1F
		1213	MAP7D1
		1214	RABL6
		1215	C5orf22
		1216	VPS26B
		1217	LARP7
		1218	ARID4B
		1219	CBWD6
		1220	BCL7A
		1221	PDCD4
		1222	CRTC2
		1223	HS1BP3
		1224	RILPL1
		1225	PPP6R3
		1226	SH3D19
		1227	WDR44
		1228	PRRC2B
		1229	DOP1A
		1230	SAMD4B
		1231	TBCEL
		1232	DNTTIP2
		1233	CEP170
		1234	CHCHD2P9
		1235	FKBP15
		1236	ZC3H13
		1237	GPATCH4
		1238	LRIF1
		1239	RBM20
		1240	BEND3
		1241	TUT4
		1242	ATPAF1
		1243	DDI2
		1244	LYRM7
		1245	RIF1
		1246	CEP350
		1247	RPRD2
		1248	ANGEL2
		1249	RNF20
		1250	PDE4DIP
		1251	ZNF318
		1252	ECPAS
		1253	ZMYM4
		1254	FHIP2A
		1255	KRT79
		1256	LARP1B
		1257	MAP1S
		1258	ARL6IP4
		1259	KAZN
		1260	ARID2
		1261	INTS3
		1262	CDCA2
		1263	CWF19L1
		1264	PDPK2P
		1265	HEATR6
		1266	WWC2
		1267	CARMIL2
		1268	CIAPIN1
		1269	SMYD5
		1270	OTUD7B
		1271	ELP2
		1272	NCAPH2
		1273	SDE2
		1274	LIN54
		1275	PPP1R2B
		1276	ANKRD54
		1277	PPP1R18
		1278	ZCCHC8
		1279	PMF1
		1280	FAM117B
		1281	CC2D1A
		1282	METTL2B
		1283	ZNF529
		1284	CEP85
		1285	SCYL2
		1286	TTC27
		1287	WDR73
		1288	NFRKB
		1289	RSBN1L
		1290	AAGAB
		1291	TTC33
		1292	FIGNL1
		1293	MIDEAS
		1294	BRAT1
		1295	ZC3H14
		1296	LARP1
		1297	BLOC1S3
		1298	MTHFD1L
		1299	AFTPH
		1300	FIP1L1
		1301	CRTC1
		1302	SASS6
		1303	ATF7IP
		1304	RANBP10
		1305	BCOR
		1306	RAB11FIP1
		1307	C1orf122
		1308	UBN2
		1309	STXBP4
		1310	LARP4
		1311	NOL8
		1312	DDX46
		1313	RUFY3
		1314	EIF3M
		1315	CDC37L1
		1316	COPS6
		1317	KDM3B
		1318	EFL1
		1319	NUP54
		1320	ZFYVE16
		1321	MON2
		1322	MAVS
		1323	CLASP1
		1324	HAUS6
		1325	HEATR3
		1326	HDGFL2
		1327	EMSY
		1328	RAI1
		1329	WAPL
		1330	R3HCC1L
		1331	RBBP6
		1332	C5orf24
		1333	SH3RF1
		1334	CNTRL
		1335	UBE2Q1
		1336	C11orf96
		1337	PRUNE1
		1338	YRDC
		1339	ZNF546
		1340	USP48
		1341	LUZP1
		1342	ZC3H18
		1343	CAND1
		1344	GLCCI1
		1345	HOOK3
		1346	PARG
		1347	CCDC25
		1348	CDR2L
		1349	NIT1
		1350	PROSER1
		1351	SPATS2
		1352	HOMER1
		1353	GATAD2A
		1354	C2CD5
		1355	IRF2BP1
		1356	CAMK1D
		1357	CRLF3
		1358	PLD3
		1359	VRK3
		1360	NUDCD3
		1361	ARID3B
		1362	CEP97
		1363	MAP7D3
		1364	CCDC117
		1365	FAM114A1
		1366	MGA
		1367	ANKHD1
		1368	SUGP1
		1369	SUGP2
		1370	SKA3
		1371	PHC2
		1372	BAP18
		1373	RBM12B
		1374	DIS3L2
		1375	ZZZ3
		1376	C1orf174
		1377	PM20D2
		1378	PHACTR4
		1379	TRMT2A
		1380	DCP1B
		1381	PELP1
		1382	TTC5
		1383	CCAR2
		1384	NUP93
		1385	LRRC47
		1386	MTURN
		1387	MICALL1
		1388	STAG2
		1389	FNBP4
		1390	KIF2B
		1391	CHCHD4
		1392	OXR1
		1393	ZGPAT
		1394	TAB3
		1395	MRPL50
		1396	ZC3H8
		1397	CAMKK1
		1398	OTUD6B
		1399	C1orf52
		1400	METTL13
		1401	UBR7
		1402	CEP112
		1403	PTGR2
		1404	MRPL43
		1405	JMY
		1406	ZIC4
		1407	ASCC1
		1408	BANP
		1409	EIF1AD
		1410	ANKRD52
		1411	NHLRC2
		1412	ATAD1
		1413	SERBP1
		1414	NFATC2IP
		1415	RNF169
		1416	LSM14A
		1417	SLAIN1
		1418	TNRC6A
		1419	PHC3
		1420	SIMC1
		1421	ABCF1
		1422	DDHD1
		1423	KMT2C
		1424	BOD1L1
		1425	NUP35
		1426	GRPEL2
		1427	CXorf38
		1428	FBXO30
		1429	PIP4K2C
		1430	CIP2A
		1431	ZNF507
		1432	CD99L2
		1433	BLOC1S5
		1434	GEMIN5
		1435	PARD3
		1436	IPO4
		1437	PPP4R1
		1438	ZNF384
		1439	SETD7
		1440	PPIL4
		1441	CCDC12
		1442	NUP133
		1443	CHAC2
		1444	ZFAND2B
		1445	LEO1
		1446	UBLCP1
		1447	TRUB1
		1448	CKAP2
		1449	PALLD
		1450	SREK1
		1451	GEMIN6
		1452	SRSF12
		1453	BBX
		1454	PPM1E
		1455	DGCR8
		1456	IRGQ
		1457	RTF1
		1458	TOPBP1
		1459	WASF1
		1460	TSC1
		1461	UBXN4
		1462	PHF3
		1463	MAML1
		1464	SEPTIN8
		1465	GCN1
		1466	NUP205
		1467	ANKS1A
		1468	RABGGTA
		1469	HDAC2
		1470	TANK
		1471	RAD50
		1472	CELF1
		1473	ARHGEF1
		1474	COPS5
		1475	GPKOW
		1476	SMARCC1
		1477	TNPO1
		1478	ARHGEF2
		1479	GLMN
		1480	USP7
		1481	LPP
		1482	TCEAL3
		1483	TSR2
		1484	RFK
		1485	GFM2
		1486	MRTFA
		1487	GTPBP3
		1488	TBRG4
		1489	CPNE4
		1490	SYAP1
		1491	RAD51AP1
		1492	C18orf25
		1493	PHF21A
		1494	RNF25
		1495	OTULIN
		1496	UPRT
		1497	PTER
		1498	ATG2B
		1499	EFHD2
		1500	CUSTOS
		1501	DCPS
		1502	PPP1R14B
		1503	ENTR1
		1504	PPCDC
		1505	FLYWCH2
		1506	KCTD12
		1507	CMBL
		1508	ATG4C
		1509	RBMXL1
		1510	SIRT1
		1511	L3HYPDH
		1512	SGTB
		1513	TMA16
		1514	MMAB
		1515	CYFIP2
		1516	NRBF2
		1517	CCDC97
		1518	EDC3
		1519	THOC1
		1520	OTUB1
		1521	HMCES
		1522	DUS3L
		1523	NUDT11
		1524	OTUD5
		1525	LTV1
		1526	ATXN7L3B
		1527	MASTL
		1528	APIP
		1529	LIN37
		1530	ERO1A
		1531	MED30
		1532	NAF1
		1533	SCLY
		1534	NSL1
		1535	PAWR
		1536	MPP4
		1537	ZFP91
		1538	USP47
		1539	PBK
		1540	EP400
		1541	RNPC3
		1542	TEPSIN
		1543	ZNF583
		1544	SCLT1
		1545	RPRD1A
		1546	IPO9
		1547	QKI
		1548	FAM193B
		1549	PUS7
		1550	KIF20B
		1551	RAB3IP
		1552	PURB
		1553	SPAG5
		1554	NACC1
		1555	PASK
		1556	CIC
		1557	CAMKK2
		1558	NUDCD1
		1559	USP28
		1560	WRNIP1
		1561	RANBP9
		1562	SRPK1
		1563	CDK5RAP2
		1564	SIN3A
		1565	INTS14
		1566	ADO
		1567	SPEN
		1568	MMS19
		1569	UHRF1
		1570	CNN2
		1571	RNF2
		1572	EYA3
		1573	LGMN
		1574	NUP88
		1575	SCAF11
		1576	EIF3C
		1577	TTC1
		1578	DNAJC7
		1579	KIF2C
		1580	NAPG
		1581	CPNE1
		1582	HAUS7
		1583	PRMT1
		1584	H2BC13
		1585	BAG1
		1586	SH3GL1
		1587	AKAP9
		1588	NCAPG
		1589	FAM118B
		1590	GRWD1
		1591	MACROD1
		1592	FYCO1
		1593	CPPED1
		1594	C7orf50
		1595	LZTS2
		1596	PDCD2L
		1597	GPATCH1
		1598	LLPH
		1599	GINS4
		1600	GINS3
		1601	CENPK
		1602	TACO1
		1603	ESYT1
		1604	UBAC1
		1605	CCM2
		1606	PSMG3
		1607	WAC
		1608	RBM42
		1609	MCMBP
		1610	ANP32E
		1611	TBCD
		1612	HGH1
		1613	MMTAG2
		1614	DOHH
		1615	SPINDOC
		1616	PAXX
		1617	MSTO1
		1618	WRAP53
		1619	C1orf50
		1620	WDR18
		1621	THUMPD3
		1622	C2orf49
		1623	PBDC1
		1624	UTP14A
		1625	DPCD
		1626	GNL3
		1627	NUP85
		1628	RPAP1
		1629	SLC4A1AP
		1630	OSBPL11
		1631	GNB1L
		1632	YTHDF1
		1633	STK33
		1634	SETD2
		1635	ASPSCR1
		1636	UCK2
		1637	UNK
		1638	TNKS1BP1
		1639	CEP44
		1640	PITHD1
		1641	SENP6
		1642	EGLN1
		1643	PSME3IP1
		1644	MTFR1L
		1645	PAIP1
		1646	CLPB
		1647	KLC2
		1648	XRN2
		1649	BRD8
		1650	NSRP1
		1651	CSTF2T
		1652	HDHD2
		1653	SIL1
		1654	ANAPC1
		1655	IRF2BPL
		1656	ASCC2
		1657	RAB3GAP2
		1658	CPVL
		1659	BOLA2
		1660	BOLA2B
		1661	ACBD3
		1662	UNC45A
		1663	DSN1
		1664	TOR1AIP2
		1665	WNK1
		1666	SMARCAD1
		1667	HEATR1
		1668	RABEP2
		1669	CCDC86
		1670	NOL6
		1671	WDCP
		1672	RPAP3
		1673	WDR55
		1674	RANBP3
		1675	DCTPP1
		1676	PEAK1
		1677	WDR26
		1678	SCAF1
		1679	PHAX
		1680	NOL11
		1681	MINDY3
		1682	GORASP2
		1683	CNOT10
		1684	EHMT1
		1685	VPS37B
		1686	MRPL44
		1687	NHEJ1
		1688	C17orf75
		1689	PLEKHA5
		1690	XPO5
		1691	CACYBP
		1692	RRAGC
		1693	PATZ1
		1694	EML4
		1695	GPBP1L1
		1696	NCOA5
		1697	TNRC6C
		1698	ZDBF2
		1699	GOPC
		1700	SARS2
		1701	BRD7
		1702	DCP1A
		1703	MED4
		1704	RIC8A
		1705	COPRS
		1706	HINT3
		1707	RRAGD
		1708	PFDN4
		1709	AVEN
		1710	EXOSC5
		1711	EXOSC3
		1712	ANLN
		1713	BIRC6
		1714	DDX21
		1715	SH3GLB2
		1716	EIF2B3
		1717	MBNL1
		1718	CHRAC1
		1719	AAAS
		1720	YAE1
		1721	STRN4
		1722	PNO1
		1723	LANCL2
		1724	KIF15
		1725	RAD18
		1726	IARS2
		1727	KLC4
		1728	ATG3
		1729	OLA1
		1730	ZFP64
		1731	PDRG1
		1732	STAU2
		1733	LIN7C
		1734	TXLNG
		1735	MRGBP
		1736	ASF1B
		1737	DNAAF2
		1738	NECAP2
		1739	BSDC1
		1740	MED9
		1741	FAM118A
		1742	CZIB
		1743	BABAM1
		1744	UCKL1
		1745	NHP2
		1746	OCIAD1
		1747	MED29
		1748	THUMPD1
		1749	TRMT1
		1750	NDE1
		1751	CDKN2AIP
		1752	PPP4R2
		1753	AATF
		1754	TERF2IP
		1755	HOXC10
		1756	TMOD3
		1757	MIS18A
		1758	GTSE1
		1759	UBAP1
		1760	GGA3
		1761	UBP1
		1762	COQ3
		1763	ITSN2
		1764	CNOT2
		1765	OGFR
		1766	PALS2
		1767	CHMP5
		1768	NDUFAF4
		1769	RAI14
		1770	POLR1H
		1771	PHRF1
		1772	VPS18
		1773	RCC2
		1774	RELCH
		1775	JCAD
		1776	SLAIN2
		1777	BCCIP
		1778	STK26
		1779	CTTNBP2NL
		1780	CPSF2
		1781	KANSL3
		1782	NCDN
		1783	SAE1
		1784	RNF7
		1785	PI4KB
		1786	ASH2L
		1787	HDAC6
		1788	EIF3K
		1789	RNF14
		1790	UBA2
		1791	PEF1
		1792	COPS7A
		1793	MALT1
		1794	DAXX
		1795	STK39
		1796	CGGBP1
		1797	SERGEF
		1798	LIMD1
		1799	NDRG3
		1800	LIMA1
		1801	UBQLN2
		1802	DDX20
		1803	BAIAP2L1
		1804	SAP30BP
		1805	GPN3
		1806	NRBP1
		1807	ATP6V1H
		1808	IPO11
		1809	TRMT112
		1810	SIX4
		1811	GGA2
		1812	GGA1
		1813	DBR1
		1814	AKAP11
		1815	CPSF3
		1816	APPL1
		1817	RCOR1
		1818	GTF3C4
		1819	ZHX1
		1820	BAG5
		1821	RAB21
		1822	ZNF346
		1823	MCTS1
		1824	MRTFB
		1825	YEATS2
		1826	HECTD1
		1827	ZMYND8
		1828	CIZ1
		1829	TPX2
		1830	DDX19B
		1831	NFU1
		1832	PRPF19
		1833	UBQLN1
		1834	SNX12
		1835	SYNRG
		1836	VPS4A
		1837	SNX6
		1838	PSMD13
		1839	FAF1
		1840	SCAF8
		1841	PPP6R1
		1842	ANKRD26
		1843	USP22
		1844	USP24
		1845	DICER1
		1846	HPS5
		1847	SCML2
		1848	EIF3L
		1849	RUVBL1
		1850	ASF1A
		1851	NCKAP1
		1852	ICE1
		1853	R3HDM2
		1854	CARHSP1
		1855	ZNF281
		1856	AAR2
		1857	NOSIP
		1858	SH3GLB1
		1859	LUC7L2
		1860	REXO2
		1861	NOP16
		1862	UFC1
		1863	HDGFL3
		1864	RABGAP1
		1865	ZNF330
		1866	R3HCC1
		1867	CCDC9
		1868	SALL2
		1869	RAD54L2
		1870	KDM3A
		1871	RBM19
		1872	PLXND1
		1873	WASHC2C
		1874	USP15
		1875	IRS2
		1876	WIPI2
		1877	LAS1L
		1878	ARIH1
		1879	SUPT16H
		1880	CD2AP
		1881	SNX5
		1882	COPG1
		1883	TACC3
		1884	STK24
		1885	IKBKG
		1886	NCOA3
		1887	MAP3K4
		1888	WASF2
		1889	MAU2
		1890	ZHX2
		1891	HOXA5
		1892	NR3C1
		1893	RBM27
		1894	ALX4
		1895	BPTF
		1896	RC3H2
		1897	FAM193A
		1898	NCOR2
		1899	RBM15
		1900	HGS
		1901	SUPT6H
		1902	TP53BP2
		1903	CEP78
		1904	ENAH
		1905	TROAP
		1906	NUFIP2
		1907	CDK12
		1908	FAM208B
		1909	RGPD1
		1910	PAPOLA
		1911	RPLA2
		1912	CCDC28A
		1913	CNOT4
		1914	ZHX3
		1915	ZMYM6
		1916	ELP4
		1917	RPS2
		1918	MRPS34
		1919	RRM1
		1920	NPEPPSL1
		1921	DDTL
		1922	TUBAL3
		1923	AIP
		1924	TRIM24
		1925	TOX3
		1926	KIF1C
		1927	OGA
		1928	RANBP6
		1929	CS
		1930	STAM2
		1931	PIAS2
		1932	KRT75
		1933	KRT18
		1934	KRT8
		1935	TPM1
		1936	RO60
		1937	ATP6V1B1
		1938	ARF4
		1939	WARS1
		1940	ACAT1
		1941	HMGB2
		1942	EEF1G
		1943	DDT
		1944	RPL13A
		1945	RPS9
		1946	CAPZA2
		1947	HARS2
		1948	TPM4
		1949	CBX1
		1950	CAP1
		1951	PFKP
		1952	RPL18A
		1953	MEF2C
		1954	KIF1A
		1955	SMAD4
		1956	DPYS
		1957	EIF3A
		1958	GSE1
		1959	LASP1
		1960	CCDC6
		1961	HSP90B2P
		1962	HSP90AA5P
		1963	RAVER1
		1964	SMAP1
		1965	SUPT20H
		1966	NEDD1
		1967	SMAP2
		1968	REPS1
		1969	ZNF503
		1970	WNK4
		1971	MED15
		1972	STRBP
		1973	RGPD5
		1974	RGPD6
		1975	EFHD1
		1976	NAPB
		1977	TAB2
		1978	ZC3H7B
		1979	IGF2BP2
		1980	DNM1L
		1981	CLINT1
		1982	IMMT
		1983	ACOT9
		1984	PC
		1985	LONP1
		1986	ALDH5A1
		1987	SNAP91
		1988	TPM2
		1989	ATP5MF
		1990	ARF5
		1991	PPP2R2B
		1992	G3BP1
		1993	TOX2
		1994	ANXA2P2
		1995	FOXO6
		1996	NDUFS8
		1997	RGPD8
[truncated: 122 more rows]
