# Supplementary material for: Tissue-specific O-GlcNAcylation profiling identifies substrates in translational machinery in Drosophila mushroom body contributing to olfactory learning
Source: eLife. 2024 Apr 15;13:e91269. doi: 10.7554/eLife.91269 (PMC11018347; doi:10.7554/eLife.91269)
Supplement: Supplementary file 3. [file elife-91269-supp3.xlsx]

## Sheet: Sheet1
48 proteins shared among the three datasets.
UniProtKB	Entry name	Gene Symble	O-GlcNAc site
O15294	OGT1_HUMAN	OGT	S10 (O15294-4), T12 (O15294-4), S18 (O15294-4), T38 (O15294-4), S52 (O15294-4), S56 (O15294-4), T449 (O15294-4)
Q9NYF8	BCLF1_HUMAN	BCLAF1	S119, S268, T333, T489, T494, S502, T825
P48634	PRC2A_HUMAN	PRRC2A	S1282, S1619, T1786, S1788, T1790, S1796, T2093
Q9BYJ9	YTHD1_HUMAN	YTHDF1	S130, T152, S156, S157, T161, T173, S196, S197, S198, T202, S205, S208, S209, T213, T232
O95487	SC24B_HUMAN	SEC24B	S139, S142, S147, S149, S197, T212, S226, S228, T232, S235, S238, S245, S253, S255, S258, T259, T261, S269, T270, T279, S281, T292, S296, S310, S311, S315, T316, S319, T327, T329, T332, T341, S342, T344, S347, S660
Q7Z739	YTHD3_HUMAN	YTHDF3	S149, S160, S161, T167, T201, T205, T207, T210, S213, S214, T222, S224, S229, S230, T236, S383
P49790	NU153_HUMAN	NUP153	S153, S164, S199, S219, T222, T224, S305, S330, S374, S459, S476, T480, S481, S482, S483, T486, S490, S491, T495, T496, S497, S498, S500, S504, S505, T509, T515, S516, S519, T520, S528, S534, T535, S543, S544, T548, S550, T556, S560, T565, S572, T578, S614, S619, S624, T630, T632, S633, T638, S643, S644, S647, S711, T761, S836, T890, S891, S892, S893, S894, S895, S897, S900, S901, S902, S908, S90…
O75179	ANR17_HUMAN	ANKRD17	S156, T1537, T1540, T1541, S1635, T1644, T1645, T1646, S1820, S1821, T1824, T1825, T1826, T1830, T1838, T1839, S1844, T1845, T1848, T1850, T1853, S1858, T2001, T2005, S2006, T2022, S2041, T2175, T2185, S2192, S2194, S2288, S2303, S2373, T2379, S2382, S2383, S2395, S2401, S2441
Q7Z589	EMSY_HUMAN	EMSY	S176, S228, T230, T232, S236, S238, S242, S247, T262, T264, S267, T268, T270, T271, T273, T274, T282, T283, S284, S286, S287, T288, S295, S391, T476, T501, T502, T504, T506, T509, T511, T514, S516, S518, T534, T535, S536, S538, T541, S546, S556, S557, S561, T563, T564, T565, T568, T573, S574, T868, S876, T880, T882, S883, T1088, S1090, T1098, T1115, T1117, T1120, S1123, S1124, T1129, S1130, T1133…
P37198	NUP62_HUMAN	NUP62	S2, T9, T13, T17, T20, T23, T25, T26, T27, T30, S33, S35, T36, S37, T39, T52, S53, T54, S56, T57, S61, T64, T66, T69, T71, T72, T75, T78, S89, S95, S100, T102, T105, S112, S118, S119, T122, S126, S127, T128, T130, S131, S132, T135, T138, S145, T146, T147, S148, T153, T154, S155, S159, T161, S169, S175, S179, T183, T187, T191, T194, T198, T199, T203, T209, T211, T215, S216, S224, T227, T230, S231,…
Q5T6F2	UBAP2_HUMAN	UBAP2	S20, S277, S303, S306, S310, S314, T372, S373, S384, T389, T390, T391, S393, T394, S398, T399, S400, T404, T405, S407, T414, S415, S417, S418, S421, S427, S446, T450, S485, T486, T487, S492, S494, S552, S565, S630, S633, S634, S635, S637, S737, S776, S987, S988, S994, S1004, S1006, S1008, T1010, T1016, S1095, S1104, S1114, T1118
P52948	NUP98_HUMAN	NUP98	S21, T22, T27, S55, T57, S69, T73, S74, T75, S76, T77, T83, S84, T87, T90, T94, S96, T99, S100, T122, S123, T124, S125, S126, T168, T184, T223, T224, T225, S230, S231, T234, S235, S236, T238, S242, S243, S244, T245, T246, S248, T257, S262, T263, T264, T268, T281, T282, S286, T293, T294, T295, T298, T315, T322, S325, T333, T335, T337, S338, T341, T347, S362, T371, T372, S375, S376, T377, T378, S37…
Q07021	C1QBP_HUMAN	C1QBP	S210
Q99700	ATX2_HUMAN	ATXN2	S213, S216, S218, S220, S528, T529, S533, S541, T666, S776
Q99496	RING2_HUMAN	RNF2	S278
P11940	PABP1_HUMAN	PABPC1	S315, T319, T485, T635
Q9Y6Y8	S23IP_HUMAN	SEC23IP	S32, T41, S44, S49, S87, S88, S90, T103, T106, S107, S111, T118, T123, T124, S126, S130, S134, S136, S138, T186, S190, S486
A8CG34	P121C_HUMAN	POM121C	S322, S385, S392, T545, T546, T607, S619, S627, S629, T637, T658, T663, T665, T670, S671, S674, T688, S692, S693 ,S699, S702, T710, S715, S850, T965, S967, T973, S977, T984, T987, T993, T1003, S1031, T1040
P35579	MYH9_HUMAN	MYH9	S36, T90, S96, S197, S282, S628, T630, S759, T1146, T1208
Q7Z417	NUFP2_HUMAN	NUFIP2	S374, S376, S379, S380, S381, S382, S384, S385, T387, T437, S546
O14974	MYPT1_HUMAN	PPP1R12A	S379, T381, T385, S387, T388, T396, S401, T416, T464, S477, S479, S564, S565, S566, S569, T570, T571, S572, T573, T577, S578, S585, S588, S589, T590, T592, T594, T597, S601, S618, T631, T637, S644, T645, S746, S773, T774, S775, S776, S777, T778, T779, S781, S782, S783, S785, T786, S788, S789, S790, S794, S795, S802, T807, S808, S835
Q8WWM7	ATX2L_HUMAN	ATXN2L	S45, T268, T269, S369, S461, T473, S500, S563, S674, S678, T679, S680, T681, T683, S684
Q9P2N6	KANL3_HUMAN	KANSL3	S523, S532, S534, S700, S703, S710, S714, S717, S719, T720, T765, T787, S791, T796, T797, S800, T805, T810, T811, T824, T859, T860, T862, T864
Q9BVL2	NUP58_HUMAN	NUP58	S6, T11, S14, T15, T22, S23, S49, S51, T52, T56, S57, S60, S61, T88, T90, T94, T97, T100, T101, S102, T105, T106, S109, T120, T127, S128, T129, S130, S132, T141, S142, T143, S147, T148, T201, T205, T208, S209, T210, T445, T449, T450, T453, T471, T478, S483, S487, T490, S522, T523, T561, S563, T567, S571
Q8IWZ3	ANKH1_HUMAN	ANKHD1	S622, S1364, T1653, S1656, S1787, S1793, S1794, T1798, T1799, S1802, S1803, T1813, T1816, S1817, T1820, T1821, S1823, T1824, T1837, S1846, S2098, S2338, S2357, S2398
Q6P4R8	NFRKB_HUMAN	NFRKB	S746, S749, T750, S752, S757, S795, S799, S803, T841, T843, T845, T862, T863, T878, T880, S881, S890, T894, S895, S900, S905, S1027, S1030, S1034, T1045, T1051, S1067, S1080, S1116, S1130, T1141, S1146, S1150, T1151, S1154, S1156, T1157, T1161, S1168, T1170, S1173, T1174, S1175, T1185, S1189, T1224, T1225, T1263, S1267, T1273, S1275, S1277, S1278, S1282, T1283, T1287, T1288
Q7Z3B4	NUP54_HUMAN	NUP54	S9, T30, T31, S32, T33, T34, S37, S40, S42, T45
Q6MZP7	LIN54_HUMAN	LIN54	T106, T109, S111, T168, T235, T237, S238, T243, S253, T257, T260, T261, S274, S276, T280, S282, T284, T286, S288, S290, S295, T296, T301, S321, S332, T333, T338, T344, T367, S368, S371, T397, T423, T428, T429, S430
Q15436	SC23A_HUMAN	SEC23A	T137, T168, S184, S226, T241, T508, S516, S627, S629, S639, S640, S641
Q13283	G3BP1_HUMAN	G3BP1	T241, S250, S256, S262, T268, S280
Q9UKX7	NUP50_HUMAN	NUP50	T259, S268, S284
Q03164	KMT2A_HUMAN	KMT2A	T259, S540, T616, S764, S775, S777, S778, S781, S783, S925, S926, S1325, S1858, S2340, S3050, T3051, T3210, S3238, S3241, S3267, S3273, T3353
Q14157	UBP2L_HUMAN	UBAP2L	T260, S262, T275, T277, S317, S319, T322, S325, S329, T332, S334, S340, T357, T358, S380, S382, S388, S394, T395, T396, T425, S427, S428, T429, S439, T444, S445, T446, S453, S454, S458, S476, S477, S605, T627, T631, T632, S680, S682, T688, T689, T690, T691, S694, T696, S705, S706, S709, S710, T713, S714, T715, S716, T721, S722, S725, S731, S732, S733, S734, T735, S770, T776, S778, S779, T782, T78…
P51610	HCFC1_HUMAN	HCFC1	T262, T405, T408, S411, T413, S419, S427, T441, T446, T457, T458, T459, T460, T466, S470, T480, T490, T495, T496, T498, T502, S507, T515, T517, S518, T529, S531, T535, S539, S540, T556, S562, S563, T566, S569, T574, T575, T579, T583, T586, T587, T588, T592, S597, S598, S603, T607, T612, T619, S620, S622, S623, T625, T627, S628, T629, T634, S638, T640, T642, T651, T652, T658, S666, S669, S674, S67…
P35658	NU214_HUMAN	NUP214	T267, S430, S433, T434, T436, T437, T439, S440, S441, S450, S457, T469, S471, T494, T496, S501, S503, S504, S509, S521, S526, S542, S547, T556, S564, S566, S575, S579, T580, S581, T592, S597, T598, S601, S602, S603, S605, S610, S613, S614, S616, S621, T628, S631, S636, S651, S961, S974, S1038, S1044, S1045, T1051, S1052, T1055, S1056, S1058, S1083, S1087, S1103, T1134, S1136, T1137, S1141, S1142,…
Q92734	TFG_HUMAN	TFG	T330, T333, S334, T337, S369, S376, T393
Q13310	PABP4_HUMAN	PABPC4	T643, S644
Q5T8P6	RBM26_HUMAN	RBM26	T78, S133, S176, S682, S689, T690, S691, T692, T695, T697
Q15637	SF01_HUMAN	SF1	T96, S315, S328, S331, T332, S333, T337, T338, S342, T521
O60506	HNRPQ_HUMAN	SYNCRIP	NA
Q06587	RING1_HUMAN	RING1	NA
Q15437	SC23B_HUMAN	SEC23B	NA
Q8NCA5	FA98A_HUMAN	FAM98A	NA
Q99567	NUP88_HUMAN	NUP88	NA
Q9UBL3	ASH2L_HUMAN	ASH2L	NA
Q92499	DDX1_HUMAN	DDX1	NA
Q9Y265	RUVB1_HUMAN	RUVBL1	NA
Q8TAQ2	SMRC2_HUMAN	SMARCC2	NA
