# Supplementary material for: Tissue-specific O-GlcNAcylation profiling identifies substrates in translational machinery in Drosophila mushroom body contributing to olfactory learning
Source: eLife. 2024 Apr 15;13:e91269. doi: 10.7554/eLife.91269 (PMC11018347; doi:10.7554/eLife.91269)
Supplement: Supplementary file 4. [file elife-91269-supp4.xlsx]

## Sheet: Sheet1
O-GlcNAcylated proteins identified by TurboID-CpOGA CD from brain neuron of Drosophila.
NO.	Majority protein IDs	UniProtKB	Gene Symbol	FlyBase ID	Annotation Symbol	Peptides	Razor + unique peptides	Unique peptides	Log2( LFQ intensity+1)
									BN TurboID-CpOGA CD				BN TurboID-CpOGA DM				Log2 Fold Change	P Value
									1	2	3	Average	1	2	3	Average
1	tr|X2JCS0|X2JCS0_DROME	X2JCS0	Dmel\CG15894	FBgn0029864	CG15894	24	24	24	27.678	27.9732	27.9524	27.8679	0	0	0	0	27.8679	8.14329e-10
2	tr|Q8IM86|Q8IM86_DROME	Q8IM86	unc-13	FBgn0025726	CG2999	19	19	17	27.2003	27.2739	27.3937	27.2893	0	0	0	0	27.2893	1.09105e-10
3	sp|X2JAU8|NWK_DROME	X2JAU8	nwk	FBgn0263456	CG43479	17	17	17	27.2456	27.3338	27.2657	27.2817	0	0	0	0	27.2817	5.492e-12
4	tr|A1Z7V1|A1Z7V1_DROME	A1Z7V1	brp	FBgn0259246	CG42344	26	26	26	27.3061	27.3901	26.8397	27.1786	0	0	0	0	27.1786	9.4445e-09
5	sp|Q9VCH5|NUP98_DROME	Q9VCH5	Nup98-96	FBgn0039120	CG10198	21	21	21	26.9292	27.0827	27.3965	27.1361	0	0	0	0	27.1361	3.95573e-09
6	sp|Q24478|CP190_DROME	Q24478	Cp190	FBgn0000283	CG6384	15	15	15	26.9251	26.8028	26.1863	26.6381	0	0	0	0	26.6381	3.25485e-08
7	sp|Q7JXF5|NUP62_DROME	Q7JXF5	Nup62	FBgn0034118	CG6251	8	8	8	26.3557	26.4445	26.6395	26.4799	0	0	0	0	26.4799	6.02258e-10
8	tr|Q9VS41|Q9VS41_DROME	Q9VS41	unc-13-4A	FBgn0035756	CG32381	11	11	11	26.1915	26.1577	26.5766	26.3086	0	0	0	0	26.3086	4.08e-09
9	tr|Q0E9B2|Q0E9B2_DROME	Q0E9B2	Dyb	FBgn0033739	CG8529	13	13	13	25.9947	26.2376	26.3579	26.1967	0	0	0	0	26.1967	1.65782e-09
10	sp|Q9NHE5|CAPS_DROME	Q9NHE5	Cadps	FBgn0053653	CG33653	14	14	14	26.2942	26.0866	26.1626	26.1811	0	0	0	0	26.1811	1.72628e-10
11	sp|P13678|KPC3_DROME	P13678	Pkc98E	FBgn0003093	CG1954	14	14	14	26.125	25.3622	26.9629	26.15	0	0	0	0	26.15	5.84581e-07
12	tr|A4V4W0|A4V4W0_DROME	A4V4W0	stnA	FBgn0016976	CG12500	14	14	14	25.5261	26.1677	26.7361	26.1433	0	0	0	0	26.1433	1.91419e-07
13	sp|Q9VXE6|NU153_DROME	Q9VXE6	Nup153	FBgn0061200	CG4453	15	15	15	26.025	26.0152	26.2583	26.0995	0	0	0	0	26.0995	5.15306e-10
14	tr|Q7PLI0|Q7PLI0_DROME	Q7PLI0	p120ctn	FBgn0260799	CG17484	5	5	5	25.731	26.3464	25.9822	26.0199	0	0	0	0	26.0199	1.33298e-08
15	tr|Q7KTW5|Q7KTW5_DROME	Q7KTW5	Dmel\CG9391	FBgn0037063	CG9391	5	5	5	26.098	25.79	25.9845	25.9575	0	0	0	0	25.9575	8.64647e-10
16	tr|M9PD65|M9PD65_DROME	M9PD65	RanGAP	FBgn0003346	CG9999	7	7	7	26.0272	25.8501	25.8846	25.9207	0	0	0	0	25.9207	1.14776e-10
17	tr|Q9W1D9|Q9W1D9_DROME	Q9W1D9	Dmel\CG3860	FBgn0034951	CG3860	12	12	12	25.698	25.8405	26.0295	25.856	0	0	0	0	25.856	1.14103e-09
18	sp|Q9V6B9|NUP54_DROME	Q9V6B9	Nup54	FBgn0033737	CG8831	6	6	6	25.8318	25.7907	25.8808	25.8344	0	0	0	0	25.8344	6.19054e-12
19	tr|F2FBA6|F2FBA6_DROME	F2FBA6	Dsp1	FBgn0278608	CG12223	3	3	3	25.8548	25.8733	25.7464	25.8248	0	0	0	0	25.8248	3.31069e-11
20	tr|A0A0B4LF93|A0A0B4LF93_DROME	A0A0B4LF93	Sin3A	FBgn0022764	CG8815	11	11	11	25.8458	25.8176	25.752	25.8051	0	0	0	0	25.8051	8.08301e-12
21	tr|Q9VQ58|Q9VQ58_DROME	Q9VQ58	EMSY	FBgn0031377	CG15356	9	9	9	25.5791	25.9612	25.7244	25.7549	0	0	0	0	25.7549	2.09772e-09
22	sp|P51140|DSH_DROME	P51140	dsh	FBgn0000499	CG18361	6	6	6	25.5151	25.7391	25.7565	25.6702	0	0	0	0	25.6702	5.04482e-10
23	tr|Q9VM93|Q9VM93_DROME	Q9VM93	Liprin-alpha	FBgn0046704	CG11199	10	10	10	25.5567	25.4206	25.9945	25.6573	0	0	0	0	25.6573	1.24361e-08
24	tr|Q9VWP8|Q9VWP8_DROME	Q9VWP8	CG32543	FBgn0259927	CG42450	7	7	7	25.8406	25.5373	25.5892	25.6557	0	0	0	0	25.6557	1.06558e-09
25	sp|Q9VDV3|NUP58_DROME	Q9VDV3	Nup58	FBgn0038722	CG7360	7	7	7	25.5495	25.5877	25.8009	25.646	0	0	0	0	25.646	5.19557e-10
26	sp|Q9VDW3|DMDB_DROME	Q9VDW3	Dys	FBgn0260003	CG34157	15	15	6	25.6442	25.5297	25.5632	25.579	0	0	0	0	25.579	1.87444e-11
27	tr|Q9W1H5|Q9W1H5_DROME	Q9W1H5	DCP1	FBgn0034921	CG11183	6	6	6	25.5365	25.5229	25.4321	25.4971	0	0	0	0	25.4971	1.63866e-11
28	tr|Q2PDY2|Q2PDY2_DROME	Q2PDY2	Trl	FBgn0013263	CG33261	5	5	5	25.298	25.3905	25.6803	25.4563	0	0	0	0	25.4563	2.51259e-09
29	tr|A4V1P2|A4V1P2_DROME	A4V1P2	orb2	FBgn0264307	CG43782	6	6	5	25.0397	25.4403	25.5075	25.3292	0	0	0	0	25.3292	6.62756e-09
30	sp|Q9GYU8|NUP88_DROME	Q9GYU8	mbo	FBgn0026207	CG6819	9	9	9	25.2329	25.0732	25.4919	25.266	0	0	0	0	25.266	3.25933e-09
31	tr|Q9VZU7|Q9VZU7_DROME	Q9VZU7	Usp5	FBgn0035402	CG12082	7	7	7	25.1196	25.0466	25.4553	25.2072	0	0	0	0	25.2072	3.72865e-09
32	tr|M9PEM4|M9PEM4_DROME	M9PEM4	CG7468	FBgn0260657	CG42540	6	6	6	24.8163	25.1387	25.66	25.205	0	0	0	0	25.205	5.4225e-08
33	tr|Q9VCE7|Q9VCE7_DROME	Q9VCE7	KrT95D	FBgn0020647	CG5405	12	12	12	25.2449	24.7791	25.5667	25.1969	0	0	0	0	25.1969	4.06499e-08
34	tr|Q9VGL0|Q9VGL0_DROME	Q9VGL0	Dmel\CG14712	FBgn0037924	CG14712	9	9	9	24.9711	24.9783	25.1745	25.0413	0	0	0	0	25.0413	3.00432e-10
35	sp|Q9VVI2|EDC3_DROME	Q9VVI2	Edc3	FBgn0036735	CG6311	7	7	7	24.9121	24.9645	25.2459	25.0408	0	0	0	0	25.0408	1.75925e-09
36	sp|O15943|CADN_DROME	O15943	CadN	FBgn0015609	CG7100	8	8	8	24.9635	24.8673	25.2467	25.0258	0	0	0	0	25.0258	2.57134e-09
37	tr|E2QCQ3|E2QCQ3_DROME	E2QCQ3	milt	FBgn0262872	CG43227	9	9	9	24.7507	24.7918	25.5332	25.0253	0	0	0	0	25.0253	6.38842e-08
38	tr|M9NDL7|M9NDL7_DROME	M9NDL7	Reps	FBgn0032341	CG6192	8	8	8	24.998	24.9552	25.0957	25.0163	0	0	0	0	25.0163	4.57729e-11
39	sp|Q7KQM6|GGYF1_DROME	Q7KQM6	Gyf	FBgn0039936	CG11148	12	12	12	24.8874	25.1365	24.9885	25.0042	0	0	0	0	25.0042	4.201e-10
40	tr|M9PBU2|M9PBU2_DROME	M9PBU2	Rac2	FBgn0014011	CG8556	5	5	2	24.7609	24.9817	24.9905	24.911	0	0	0	0	24.911	4.96254e-10
41	tr|M9PE74|M9PE74_DROME	M9PE74	nocte	FBgn0261710	CG17255	6	6	6	24.974	24.7452	24.8248	24.848	0	0	0	0	24.848	3.18031e-10
42	tr|M9PI47|M9PI47_DROME	M9PI47	Sap130	FBgn0262714	CG11006	6	6	6	24.7084	24.9057	24.8034	24.8059	0	0	0	0	24.8059	1.66974e-10
43	tr|Q9W3J1|Q9W3J1_DROME	Q9W3J1	Gbeta5	FBgn0030011	CG10763	4	4	4	24.8239	24.5659	24.9949	24.7949	0	0	0	0	24.7949	3.83725e-09
44	sp|P42207|SEPT1_DROME	P42207	Septin1	FBgn0011710	CG1403	5	5	5	24.6527	24.6113	25.0706	24.7782	0	0	0	0	24.7782	7.36963e-09
45	tr|A0A0B4LF49|A0A0B4LF49_DROME	A0A0B4LF49	metro	FBgn0050021	CG30021	7	7	7	24.6275	24.5537	25.0295	24.7369	0	0	0	0	24.7369	7.65443e-09
46	tr|Q9VPL6|Q9VPL6_DROME	Q9VPL6	kis	FBgn0266557	CG3696	6	6	6	24.8965	24.4139	24.8578	24.7227	0	0	0	0	24.7227	9.22234e-09
47	tr|Q7KY08|Q7KY08_DROME	Q7KY08	AGO1	FBgn0262739	CG6671	8	8	8	24.67	24.4428	24.6575	24.5901	0	0	0	0	24.5901	4.84888e-10
48	tr|Q0E976|Q0E976_DROME	Q0E976	Dmel\CG10151	FBgn0033960	CG10151	7	7	7	24.4699	24.3512	24.8844	24.5685	0	0	0	0	24.5685	1.1234e-08
49	sp|Q9V466|NU107_DROME	Q9V466	Nup107	FBgn0027868	CG6743	9	9	9	24.5319	24.4296	24.572	24.5112	0	0	0	0	24.5112	5.36654e-11
50	sp|Q9VKJ1|MPND_DROME	Q9VKJ1	CG4751	FBgn0032348	CG4751	5	5	5	24.4291	24.5118	24.5662	24.5023	0	0	0	0	24.5023	4.20244e-11
51	tr|Q9VE73|Q9VE73_DROME	Q9VE73	Wdr37	FBgn0038617	CG12333	7	7	7	24.5148	24.0306	24.8972	24.4809	0	0	0	0	24.4809	6.59726e-08
52	tr|A0A0S0X7W8|A0A0S0X7W8_DROME	A0A0S0X7W8	Dmel\CG3638	FBgn0261444	CG3638	5	5	5	24.4092	24.529	24.4969	24.4784	0	0	0	0	24.4784	2.74059e-11
53	tr|Q8IMJ0|Q8IMJ0_DROME	Q8IMJ0	VhaAC45RP	FBgn0051030	CG31030	3	3	3	24.6595	23.9199	24.7306	24.4367	0	0	0	0	24.4367	7.58901e-08
54	sp|Q8SY33|GAWKY_DROME	Q8SY33	gw	FBgn0051992	CG31992	8	8	8	24.1697	23.8749	25.0951	24.3799	0	0	0	0	24.3799	3.09601e-07
55	tr|E1JH51|E1JH51_DROME	E1JH51	Su(z)2	FBgn0265623	CG3905	8	8	8	24.1684	24.3422	24.4767	24.3291	0	0	0	0	24.3291	1.08692e-09
56	tr|Q8IQX3|Q8IQX3_DROME	Q8IQX3	Dmel\CG32544	FBgn0052544	CG32544	3	3	3	24.1704	24.1461	24.6243	24.3136	0	0	0	0	24.3136	1.00386e-08
57	tr|Q7K180|Q7K180_DROME	Q7K180	Map60	FBgn0010342	CG1825	6	6	6	24.2474	24.2555	24.3466	24.2832	0	0	0	0	24.2832	1.76552e-11
58	tr|A1ZAC7|A1ZAC7_DROME	A1ZAC7	fidipidine	FBgn0025519	CG7773	4	4	4	24.113	24.2046	24.4427	24.2534	0	0	0	0	24.2534	1.61697e-09
59	tr|A0A0B4LIF3|A0A0B4LIF3_DROME	A0A0B4LIF3	Nelf-A	FBgn0038872	CG5874	6	6	6	24.1304	24.2307	24.3231	24.2281	0	0	0	0	24.2281	1.66873e-10
60	tr|Q9VCB6|Q9VCB6_DROME	Q9VCB6	twin	FBgn0011725	CG31137	4	4	4	24.4901	23.6935	24.3961	24.1932	0	0	0	0	24.1932	6.9849e-08
61	tr|A1Z9M4|A1Z9M4_DROME	A1Z9M4	cg	FBgn0000289	CG8367	4	4	4	23.6508	24.5815	24.3275	24.1866	0	0	0	0	24.1866	1.04265e-07
62	tr|Q9VKM2|Q9VKM2_DROME	Q9VKM2	SCAR	FBgn0041781	CG4636	3	3	3	23.9704	24.0353	24.44	24.1486	0	0	0	0	24.1486	8.21905e-09
63	sp|Q94517|HDAC1_DROME	Q94517	HDAC1	FBgn0015805	CG7471	2	2	2	24.1531	23.8417	24.4312	24.142	0	0	0	0	24.142	1.48324e-08
64	sp|Q9VG73|ILF2_DROME	Q9VG73	CG5641	FBgn0038046	CG5641	4	4	4	24.0868	24.077	24.2536	24.1392	0	0	0	0	24.1392	1.90643e-10
65	tr|Q9W5C1|Q9W5C1_DROME	Q9W5C1	Dmel\CG3703	FBgn0040348	CG3703	6	6	6	24.0173	24.1561	24.0578	24.0771	0	0	0	0	24.0771	5.14072e-11
66	tr|Q9W414|Q9W414_DROME	Q9W414	Rpt4	FBgn0028685	CG3455	3	3	3	24.3067	23.8946	24.0256	24.0756	0	0	0	0	24.0756	3.9024e-09
67	tr|A0A0B4KED3|A0A0B4KED3_DROME	A0A0B4KED3	mim	FBgn0053558	CG33558	3	3	3	24.1712	23.977	24.0522	24.0668	0	0	0	0	24.0668	1.82648e-10
68	tr|Q9VXA3|Q9VXA3_DROME	Q9VXA3	RSG7	FBgn0024941	CG9108	5	5	5	23.7688	23.8502	24.1891	23.9361	0	0	0	0	23.9361	5.01289e-09
69	tr|Q9W1I8|Q9W1I8_DROME	Q9W1I8	Snap29	FBgn0034913	CG11173	3	3	3	23.7472	23.9115	24.0431	23.9006	0	0	0	0	23.9006	9.86165e-10
70	sp|Q9I7T7|LAR4_DROME	Q9I7T7	Larp4B	FBgn0035424	CG11505	4	4	4	23.751	24.0656	23.733	23.8499	0	0	0	0	23.8499	2.52145e-09
71	tr|Q8IN90|Q8IN90_DROME	Q8IN90	wrd	FBgn0042693	CG7913	5	5	4	23.6194	23.7105	24.0265	23.7855	0	0	0	0	23.7855	4.33778e-09
72	tr|E1JIQ2|E1JIQ2_DROME	E1JIQ2	GluClalpha	FBgn0024963	CG7535	3	3	3	23.619	23.6209	24.0944	23.7781	0	0	0	0	23.7781	1.17438e-08
73	tr|E1JGK7|E1JGK7_DROME	E1JGK7	lolal	FBgn0022238	CG5738	3	3	3	23.4377	23.9412	23.8899	23.7563	0	0	0	0	23.7563	1.23287e-08
74	sp|P45889|ACTZ_DROME	P45889	Arp1	FBgn0011745	CG6174	2	2	2	23.7578	23.7229	23.472	23.6509	0	0	0	0	23.6509	1.25879e-09
75	tr|A1Z8M2|A1Z8M2_DROME	A1Z8M2	tou	FBgn0033636	CG10897	4	4	4	23.7042	23.3994	23.492	23.5319	0	0	0	0	23.5319	1.29627e-09
76	tr|A0A0B4KI71|A0A0B4KI71_DROME	A0A0B4KI71	Map205	FBgn0002645	CG1483	4	4	4	23.3184	23.7813	23.3184	23.4727	0	0	0	0	23.4727	1.11993e-08
77	tr|A2VEJ9|A2VEJ9_DROME	A2VEJ9	cg4266	FBgn0034598	CG4266	2	2	2	23.3521	23.4741	23.5859	23.4707	0	0	0	0	23.4707	4.11038e-10
78	tr|Q59DP7|Q59DP7_DROME	Q59DP7	Syt7	FBgn0039900	CG2381	4	4	4	23.0969	23.529	23.3218	23.3159	0	0	0	0	23.3159	4.91859e-09
79	tr|A0A0B4LJ24|A0A0B4LJ24_DROME	A0A0B4LJ24	RhoGAP100F	FBgn0039883	CG1976	39	39	39	28.4568	28.4944	28.5589	28.5034	0	23.0992	0	7.69975	20.8036	0.0539915
80	sp|Q24212|STNB_DROME	Q24212	stnB	FBgn0016975	CG12473	19	19	19	28.5979	27.3679	28.0408	28.0022	0	23.7268	0	7.90894	20.0933	0.0641162
81	sp|A0A0B4K7J2|RBP2_DROME	A0A0B4K7J2	Nup358	FBgn0039302	CG11856	38	38	38	28.7611	28.4508	28.8132	28.675	0	26.0274	0	8.67579	19.9992	0.082486
82	tr|E3CTP7|E3CTP7_DROME	E3CTP7	Eps-15	FBgn0035060	CG16932	18	18	18	28.1499	28.2184	28.4567	28.275	0	25.6806	0	8.56022	19.7148	0.0826715
83	tr|M9PDC7|M9PDC7_DROME	M9PDC7	Dap160	FBgn0023388	CG1099	16	16	16	27.6055	27.4872	27.724	27.6056	0	24.1612	0	8.05372	19.5518	0.0721685
84	tr|X2JIZ6|X2JIZ6_DROME	X2JIZ6	sdt	FBgn0261873	CG32717	21	21	21	26.7909	26.8148	26.7758	26.7938	0	22.189	0	7.39632	19.3975	0.05864
85	sp|Q9W1X4|NU214_DROME	Q9W1X4	Nup214	FBgn0010660	CG3820	16	16	16	27.367	27.3295	27.2243	27.307	0	23.849	0	7.94967	19.3573	0.0715975
86	tr|A0A0B4K620|A0A0B4K620_DROME	A0A0B4K620	mtd	FBgn0013576	CG32464	23	23	23	27.7441	27.8006	28.1775	27.9074	0	25.7668	0	8.58894	19.3185	0.0877473
87	tr|Q7KJA9|Q7KJA9_DROME	Q7KJA9	sxc	FBgn0261403	CG10392	15	15	15	26.4221	26.5863	26.8347	26.6144	0	22.514	0	7.50465	19.1097	0.0635706
88	tr|M9PGM6|M9PGM6_DROME	M9PGM6	EG:9D2.2	FBgn0023531	CG32809	15	15	15	25.9379	26.8572	27.1536	26.6496	0	23.4551	0	7.81838	18.8312	0.0738782
89	sp|Q9TVP3|JDP_DROME	Q9TVP3	jdp	FBgn0027654	CG2239	5	5	5	27.1222	27.4712	27.6114	27.4016	0	25.7149	0	8.57165	18.8299	0.0930198
90	tr|A0A0B4KFC5|A0A0B4KFC5_DROME	A0A0B4KFC5	lig	FBgn0020279	CG8715	11	11	11	27.0917	27.0527	26.1037	26.7494	0	24.002	0	8.00065	18.7487	0.0792491
91	tr|Q8SYD9|Q8SYD9_DROME	Q8SYD9	EndoB	FBgn0034433	CG9834	12	12	12	26.9104	26.938	27.3029	27.0504	0	25.0802	0	8.36006	18.6904	0.0890735
92	tr|Q0E8S7|Q0E8S7_DROME	Q0E8S7	homer	FBgn0025777	CG11324	15	15	15	26.9957	27.0829	27.4065	27.1617	0	25.6918	0	8.56392	18.5978	0.0956587
93	sp|Q9V4C8|HCF_DROME	Q9V4C8	Hcf	FBgn0039904	CG1710	22	22	22	26.891	27.1758	27.3377	27.1348	0	25.6969	0	8.56562	18.5692	0.0960651
94	sp|Q9VI75|PICAL_DROME	Q9VI75	lap	FBgn0086372	CG2520	8	8	8	26.8301	26.5786	26.917	26.7752	0	24.665	0	8.22168	18.5536	0.0870176
95	tr|X2JC31|X2JC31_DROME	X2JC31	Chc	FBgn0000319	CG9012	2	2	2	27.5095	0	27.3093	18.2729	0	0	0	0	18.2729	0.116122
96	tr|M9PH86|M9PH86_DROME	M9PH86	mmd	FBgn0259110	CG42252	16	16	16	26.4039	26.7446	26.9124	26.687	0	25.2809	0	8.42695	18.26	0.0961844
97	tr|Q9W392|Q9W392_DROME	Q9W392	CCT2	FBgn0030086	CG7033	12	12	12	26.7096	26.7384	26.8044	26.7508	0	25.9448	0	8.64825	18.1026	0.104453
98	tr|Q9Y134|Q9Y134_DROME	Q9Y134	Mtr4	FBgn0001986	CG4152	15	15	15	25.945	25.5708	26.2054	25.9071	0	23.5	0	7.83332	18.0737	0.0823346
99	tr|Q8IMC1|Q8IMC1_DROME	Q8IMC1	Gat	FBgn0039915	CG1732	7	7	7	26.1793	25.8869	26.2151	26.0938	0	24.3337	0	8.11123	17.9825	0.090934
100	tr|E1JHT6|E1JHT6_DROME	E1JHT6	Rtnl1	FBgn0053113	CG33113	13	13	13	26.4947	26.3109	26.8599	26.5552	0	25.8218	0	8.60728	17.9479	0.105445
101	tr|Q9VPX6|Q9VPX6_DROME	Q9VPX6	capt	FBgn0261458	CG33979	13	13	13	26.2583	26.0545	26.4552	26.256	0	24.9311	0	8.31037	17.9456	0.0969745
102	sp|Q9VX32|RG190_DROME	Q9VX32	RhoGAPp190	FBgn0026375	CG32555	12	12	12	25.8271	25.474	25.5264	25.6091	0	23.0249	0	7.67498	17.9342	0.0796858
103	tr|Q9VK85|Q9VK85_DROME	Q9VK85	eRF3	FBgn0020443	CG6382	8	8	8	26.2454	26.3634	26.577	26.3953	0	25.4209	0	8.47363	17.9216	0.101931
104	tr|Q9W3Y3|Q9W3Y3_DROME	Q9W3Y3	Dmel\CG3226	FBgn0029882	CG3226	6	6	6	26.1441	25.9776	26.1925	26.1047	0	24.7413	0	8.24711	17.8576	0.0963209
105	tr|A1ZBL9|A1ZBL9_DROME	A1ZBL9	par-1	FBgn0260934	CG8201	10	10	10	25.8622	25.9436	26.201	26.0023	0	24.4895	0	8.16318	17.8391	0.0942015
106	sp|Q24368|ISWI_DROME	Q24368	Iswi	FBgn0011604	CG8625	13	13	13	25.6416	25.5294	26.3003	25.8238	0	23.9849	0	7.99498	17.8288	0.0897116
107	tr|Q86BS3|Q86BS3_DROME	Q86BS3	Chro	FBgn0044324	CG10712	12	12	12	25.6797	25.9093	25.8247	25.8046	0	24.0465	0	8.01551	17.7891	0.0906875
108	tr|Q9VP57|Q9VP57_DROME	Q9VP57	pzg	FBgn0259785	CG7752	11	11	11	25.7869	26.0195	26.1	25.9688	0	24.5492	0	8.18305	17.7858	0.0954523
109	sp|A0A0B4KGY6|NOVA_DROME	A0A0B4KGY6	ps	FBgn0261552	CG42670	11	11	11	25.8611	26.5081	25.9941	26.1211	0	25.1506	0	8.38354	17.7376	0.101894
110	sp|Q9VH07|RUVB1_DROME	Q9VH07	pont	FBgn0040078	CG4003	10	10	10	25.9434	25.9625	26.096	26.0006	0	24.8789	0	8.29295	17.7077	0.09962
111	tr|Q7K012|Q7K012_DROME	Q7K012	Bap55	FBgn0025716	CG6546	6	6	6	25.8906	26.0264	26.0296	25.9822	0	24.8608	0	8.28693	17.6953	0.0996138
112	tr|R9PY70|R9PY70_DROME	R9PY70	CG6448	FBgn0261802	CG42748	10	10	10	25.579	25.5595	25.9086	25.6824	0	24.0257	0	8.00857	17.6738	0.0919694
113	tr|X2JC94|X2JC94_DROME	X2JC94	Pgam5	FBgn0023517	CG14816	7	7	7	25.8446	26.1747	26.2997	26.1063	0	25.3538	0	8.45128	17.655	0.104977
114	sp|Q9W4P5|VA0D1_DROME	Q9W4P5	VhaAC39-1	FBgn0285910	CG2934	6	6	6	26.0105	25.1548	25.8351	25.6668	0	24.8426	0	8.28086	17.3859	0.10383
115	tr|A0A0B4LGZ5|A0A0B4LGZ5_DROME	A0A0B4LGZ5	RpL11	FBgn0013325	CG7726	3	3	3	0	26.2321	25.893	17.3751	0	0	0	0	17.3751	0.116133
116	tr|M9NE68|M9NE68_DROME	M9NE68	Hsp23	FBgn0001224	CG4463	5	5	5	25.8919	25.492	26.0239	25.8026	0	25.5583	0	8.51942	17.2832	0.112427
117	tr|Q8IML5|Q8IML5_DROME	Q8IML5	Vha100-1	FBgn0028671	CG1709	6	6	6	25.5959	24.8031	25.3725	25.2572	0	24.0429	0	8.01428	17.2429	0.097917
118	tr|Q9VHX9|Q9VHX9_DROME	Q9VHX9	CD98hc	FBgn0037533	CG2791	10	10	10	25.5238	24.6813	25.794	25.333	0	24.6628	0	8.22092	17.1121	0.106046
119	tr|A0A0B4JDA0|A0A0B4JDA0_DROME	A0A0B4JDA0	mor	FBgn0002783	CG18740	7	7	7	25.2598	25.2382	25.462	25.32	0	24.665	0	8.22168	17.0983	0.106073
120	tr|Q9W5R5|Q9W5R5_DROME	Q9W5R5	Slmap	FBgn0040011	CG17494	10	10	10	24.5055	24.9622	25.234	24.9006	0	23.4682	0	7.82275	17.0778	0.0945022
121	tr|A4V201|A4V201_DROME	A4V201	Taf4	FBgn0010280	CG5444	8	8	8	24.9318	25.1966	25.2613	25.1299	0	24.2048	0	8.06826	17.0616	0.101972
122	sp|Q9XY35|QCR9_DROME	Q9XY35	ox	FBgn0011227	CG8764	2	2	2	25.7756	25.5027	25.6178	25.632	25.7531	0	0	8.58437	17.0477	0.118014
123	sp|O18373|SPS1_DROME	O18373	Sps1	FBgn0261270	CG8553	5	5	5	25.1433	25.0361	25.1756	25.1183	0	24.225	0	8.075	17.0433	0.102421
124	tr|Q7K188|Q7K188_DROME	Q7K188	Dmel\CG6329	FBgn0033872	CG6329	3	3	3	24.5495	25.0559	25.3047	24.97	0	23.7803	0	7.92676	17.0433	0.0980639
125	sp|A1Z9E2|LIN54_DROME	A1Z9E2	mip120	FBgn0033846	CG6061	6	6	6	25.0863	25.0794	25.0201	25.0619	0	24.1528	0	8.05094	17.011	0.102154
126	tr|L0MLN1|L0MLN1_DROME	L0MLN1	Asator	FBgn0039908	CG11533	11	11	11	25.3823	0	25.5796	16.9873	0	0	0	0	16.9873	0.116122
127	tr|Q9VVA6|Q9VVA6_DROME	Q9VVA6	nudC	FBgn0021768	CG9710	6	6	6	24.9253	24.9293	24.7943	24.8829	0	23.7363	0	7.91212	16.9708	0.0985459
128	sp|Q23983|SNAP_DROME	Q23983	alphaSnap	FBgn0250791	CG6625	9	9	9	25.0011	24.7026	25.2787	24.9942	0	24.204	0	8.06801	16.9261	0.103948
129	tr|Q9VJH2|Q9VJH2_DROME	Q9VJH2	AspRS-m	FBgn0051739	CG31739	10	10	10	25.1062	25.062	25.2508	25.1397	0	24.646	0	8.21533	16.9243	0.108447
130	tr|M9PDW0|M9PDW0_DROME	M9PDW0	nSyb	FBgn0013342	CG17248	2	2	2	24.9366	25.0141	25.182	25.0442	0	24.3718	0	8.12393	16.9203	0.105701
131	tr|A0A0B4KH34|A0A0B4KH34_DROME	A0A0B4KH34	AnxB9	FBgn0000083	CG5730	9	9	9	25.4849	25.1981	25.0601	25.2477	0	25.1763	0	8.39209	16.8556	0.115023
132	tr|Q9VDH3|Q9VDH3_DROME	Q9VDH3	Ktl	FBgn0038839	CG10830	5	5	5	24.8939	24.6469	25.1435	24.8948	0	24.1727	0	8.05757	16.8372	0.104916
133	sp|P25455|PIP1_DROME	P25455	Plc21C	FBgn0004611	CG4574	10	10	10	25.1097	24.3547	25.4341	24.9662	0	24.3888	0	8.12959	16.8366	0.1073
134	tr|O61380|O61380_DROME	O61380	eIF4G1	FBgn0023213	CG10811	11	11	10	24.8531	24.8172	25.1091	24.9264	0	24.2875	0	8.09583	16.8306	0.106168
135	sp|Q7KN62|TERA_DROME	Q7KN62	TER94	FBgn0286784	CG2331	11	11	11	25.0994	24.9619	24.931	24.9975	0	24.5671	0	8.18905	16.8084	0.109379
136	tr|Q7KUB0|Q7KUB0_DROME	Q7KUB0	Idh	FBgn0001248	CG7176	9	9	9	25.3493	25.1089	25.2683	25.2422	0	25.303	0	8.43432	16.8079	0.117086
137	sp|Q9VVB4|CCD22_DROME	Q9VVB4	CG9951	FBgn0036671	CG9951	10	10	10	24.9611	0	25.3686	16.7766	0	0	0	0	16.7766	0.116143
138	tr|Q9VB05|Q9VB05_DROME	Q9VB05	ALiX	FBgn0086346	CG12876	6	6	6	24.4722	24.6927	24.435	24.5333	0	23.2981	0	7.76603	16.7673	0.0970048
139	sp|P81900|KAPR2_DROME	P81900	Pka-R2	FBgn0022382	CG15862	5	5	5	24.9705	24.998	24.8726	24.947	0	24.585	0	8.19501	16.752	0.110422
140	sp|Q9VEN1|FLNA_DROME	Q9VEN1	cher	FBgn0014141	CG3937	15	15	15	25.5735	25.3151	25.043	25.3106	0	25.7188	0	8.57295	16.7376	0.122666
141	sp|Q27331|VATA2_DROME	Q27331	Vha68-2	FBgn0263598	CG3762	15	10	10	25.493	25.1143	25.3973	25.3349	0	25.8092	0	8.60307	16.7318	0.123709
142	sp|Q8IH18|4ET_DROME	Q8IH18	4E-T	FBgn0052016	CG32016	6	6	6	24.3468	24.5539	24.8893	24.5967	0	23.6223	0	7.87411	16.7226	0.100965
143	tr|A0A0B4KHJ5|A0A0B4KHJ5_DROME	A0A0B4KHJ5	GlyS	FBgn0266064	CG6904	10	10	10	24.9641	24.6794	25.1863	24.9433	0	24.753	0	8.25099	16.6923	0.113144
144	tr|M9NDP1|M9NDP1_DROME	M9NDP1	ctp	FBgn0011760	CG6998	2	2	2	25.0365	24.7492	24.6975	24.8277	0	24.4138	0	8.13795	16.6898	0.109605
145	tr|Q9VV52|Q9VV52_DROME	Q9VV52	RAF2	FBgn0036624	CG4877	7	7	7	24.2757	24.3568	24.6764	24.4363	0	23.2559	0	7.75198	16.6843	0.0977627
146	tr|M9PG32|M9PG32_DROME	M9PG32	Taf6	FBgn0010417	CG32211	9	9	9	24.6175	24.6405	25.216	24.8247	0	24.4262	0	8.14208	16.6826	0.109897
147	sp|Q27268|DX39B_DROME	Q27268	Hel25E	FBgn0014189	CG7269	6	6	6	24.9968	24.8637	24.9256	24.9287	0	24.7477	0	8.24922	16.6795	0.113249
148	tr|X2JD89|X2JD89_DROME	X2JD89	bt	FBgn0005666	CG32019	30	30	30	25.9002	24.4581	25.5917	25.3167	0	25.9625	0	8.65416	16.6625	0.126846
149	tr|Q59E23|Q59E23_DROME	Q59E23	Hn	FBgn0001208	CG7399	9	9	9	25.0137	25.1144	25.152	25.0934	0	25.3044	0	8.43481	16.6586	0.11949
150	tr|M9PJN3|M9PJN3_DROME	M9PJN3	Rab3-GEF	FBgn0030613	CG5627	10	10	10	25.0768	0	24.8511	16.6426	0	0	0	0	16.6426	0.116125
151	tr|B7YZI0|B7YZI0_DROME	B7YZI0	Vha44	FBgn0287825	CG8048	8	8	8	25.1432	24.4275	25.1352	24.902	0	24.7995	0	8.26649	16.6355	0.114593
152	sp|P23128|DDX6_DROME	P23128	me31B	FBgn0004419	CG4916	5	5	5	24.3862	24.0911	24.6512	24.3762	0	23.2897	0	7.76323	16.613	0.0991445
153	tr|Q9VLQ9|Q9VLQ9_DROME	Q9VLQ9	Snx6	FBgn0032005	CG8282	4	4	4	24.0443	23.9059	24.5929	24.181	0	22.8216	0	7.60721	16.5738	0.0949702
154	tr|Q9VM11|Q9VM11_DROME	Q9VM11	Dmel\CG5973	FBgn0031914	CG5973	8	8	8	24.7272	24.9514	24.5435	24.7407	0	24.528	0	8.17601	16.5647	0.11275
155	tr|E2QD63|E2QD63_DROME	E2QD63	HIP-R	FBgn0029676	CG2947	6	6	6	24.6882	24.2228	24.7438	24.5516	0	23.9959	0	7.99864	16.5529	0.107349
156	tr|X2J9V9|X2J9V9_DROME	X2J9V9	RhoGAP1A	FBgn0025836	CG40494	9	9	9	24.4903	0	25.1685	16.5529	0	0	0	0	16.5529	0.116191
157	tr|A0A126GV04|A0A126GV04_DROME	A0A126GV04	Syx1A	FBgn0013343	CG31136	3	3	3	24.2132	24.5567	24.9927	24.5875	0	24.1264	0	8.04212	16.5454	0.10888
158	tr|A0A0B4LIJ0|A0A0B4LIJ0_DROME	A0A0B4LIJ0	Rpt2	FBgn0015282	CG5289	5	5	5	24.8874	24.6552	24.8231	24.7886	0	24.7786	0	8.25954	16.529	0.115966
159	tr|Q8T6I0|Q8T6I0_DROME	Q8T6I0	Past1	FBgn0016693	CG6148	10	10	10	24.4449	24.9724	24.8919	24.7697	0	24.7369	0	8.24562	16.5241	0.115642
160	tr|Q9VKZ8|Q9VKZ8_DROME	Q9VKZ8	Usp14	FBgn0032216	CG5384	5	5	5	24.9624	24.3418	24.5924	24.6322	0	24.3324	0	8.11082	16.5214	0.111392
161	sp|O18413|PRS8_DROME	O18413	Rpt6	FBgn0020369	CG1489	3	3	2	24.7379	24.546	24.5795	24.6211	0	24.392	0	8.13066	16.4905	0.112452
162	tr|Q9VNC3|Q9VNC3_DROME	Q9VNC3	Hcs	FBgn0037332	CG14670	7	7	7	24.8204	24.3245	25.3369	24.8272	0	25.018	0	8.33934	16.4879	0.119359
163	sp|B7YZV4|PDE1_DROME	B7YZV4	Pde1c	FBgn0264815	CG44007	7	7	7	24.7708	0	24.6509	16.4739	0	0	0	0	16.4739	0.116119
164	tr|Q9VPE2|Q9VPE2_DROME	Q9VPE2	ND-39	FBgn0037001	CG6020	6	6	6	24.6891	24.5318	24.6915	24.6374	0	24.5621	0	8.18738	16.4501	0.11491
165	tr|X2JDI1|X2JDI1_DROME	X2JDI1	mts	FBgn0004177	CG7109	4	4	4	24.614	0	24.7267	16.4469	0	0	0	0	16.4469	0.116119
166	tr|Q7JMV3|Q7JMV3_DROME	Q7JMV3	CaMKI	FBgn0016126	CG1495	4	4	4	24.5647	0	24.6885	16.4177	0	0	0	0	16.4177	0.116119
167	tr|Q9V470|Q9V470_DROME	Q9V470	ScsbetaG	FBgn0029118	CG10622	7	7	7	24.7456	24.6778	24.544	24.6558	0	24.7362	0	8.2454	16.4104	0.117424
168	sp|Q9VHD2|MAAI2_DROME	Q9VHD2	GstZ2	FBgn0037697	CG9363	4	4	4	24.4457	0	24.7303	16.392	0	0	0	0	16.392	0.11613
169	tr|Q59E30|Q59E30_DROME	Q59E30	fax	FBgn0014163	CG4609	5	5	5	24.9154	0	24.2521	16.3892	0	0	0	0	16.3892	0.116189
170	sp|A1Z9G2|SYF1_DROME	A1Z9G2	fand	FBgn0033859	CG6197	6	6	6	24.3215	24.6931	24.3287	24.4478	0	24.1847	0	8.06158	16.3862	0.111907
171	sp|P42284|LOLA2_DROME	P42284	lola	FBgn0283521	CG12052	3	3	3	24.0424	24.3574	24.3668	24.2556	0	23.6174	0	7.87247	16.3831	0.105919
172	tr|A8JQT5|A8JQT5_DROME	A8JQT5	Cdep	FBgn0265082	CG44193	11	11	11	24.467	0	24.662	16.3763	0	0	0	0	16.3763	0.116123
173	tr|Q9VT32|Q9VT32_DROME	Q9VT32	Prps	FBgn0036030	CG6767	6	6	6	24.5239	24.474	24.7541	24.584	0	24.6264	0	8.20882	16.3752	0.116819
174	sp|P80455|RS12_DROME	P80455	RpS12	FBgn0286213	CG11271	4	4	4	24.7107	0	24.3998	16.3702	0	0	0	0	16.3702	0.116132
175	tr|M9PE30|M9PE30_DROME	M9PE30	Chd64	FBgn0035499	CG14996	5	5	5	24.5442	24.7393	24.8552	24.7129	0	25.0325	0	8.34418	16.3687	0.121335
176	tr|Q9VY87|Q9VY87_DROME	Q9VY87	CtsB	FBgn0030521	CG10992	4	4	4	24.5623	24.3108	24.4766	24.4499	24.2729	0	0	8.09097	16.3589	0.113267
177	sp|P17886|CRN_DROME	P17886	crn	FBgn0000377	CG3193	12	12	12	24.8088	24.7659	24.8627	24.8125	0	25.3863	0	8.46211	16.3503	0.125502
178	tr|X2JEU3|X2JEU3_DROME	X2JEU3	Dmel\CG1737	FBgn0030293	CG1737	5	5	5	24.2816	24.2821	24.4674	24.3437	0	23.9812	0	7.99373	16.3499	0.11028
179	tr|X2JEX7|X2JEX7_DROME	X2JEX7	Usp7	FBgn0030366	CG1490	9	9	9	23.9427	0	25.0949	16.3459	0	0	0	0	16.3459	0.116336
180	tr|M9PFN1|M9PFN1_DROME	M9PFN1	rept	FBgn0040075	CG9750	5	5	5	0	24.4015	24.6275	16.343	0	0	0	0	16.343	0.116125
181	tr|Q9VK35|Q9VK35_DROME	Q9VK35	DnaJ-H	FBgn0032474	CG9828	2	2	2	0	24.3991	24.5884	16.3292	0	0	0	0	16.3292	0.116122
182	tr|M9NFP7|M9NFP7_DROME	M9NFP7	elav	FBgn0260400	CG4262	4	4	2	24.4446	0	24.5388	16.3278	0	0	0	0	16.3278	0.116118
183	tr|Q9VT60|Q9VT60_DROME	Q9VT60	iPLA2-VIA	FBgn0036053	CG6718	7	7	7	24.4922	0	24.4223	16.3048	0	0	0	0	16.3048	0.116117
184	sp|Q9V431|API5_DROME	Q9V431	cass	FBgn0286781	CG6582	9	9	9	24.7493	24.4522	24.6751	24.6256	0	25.0072	0	8.33574	16.2898	0.12238
185	tr|O76742|O76742_DROME	O76742	Rab7	FBgn0015795	CG5915	5	5	5	24.6199	24.4544	24.6236	24.566	0	24.8436	0	8.28121	16.2848	0.120662
186	tr|Q7K3D4|Q7K3D4_DROME	Q7K3D4	zda	FBgn0034368	CG5482	4	4	4	24.4941	24.1493	24.7203	24.4546	0	24.5161	0	8.17202	16.2826	0.117173
187	tr|M9PDW8|M9PDW8_DROME	M9PDW8	CG3950	FBgn0085446	CG34417	15	15	15	24.4073	24.8665	24.4529	24.5756	0	24.904	0	8.30134	16.2742	0.121536
188	tr|A0A0B4KGE6|A0A0B4KGE6_DROME	A0A0B4KGE6	Rpn8	FBgn0002787	CG3416	4	4	4	24.133	23.7243	24.2074	24.0216	0	23.2909	0	7.76365	16.2579	0.104392
189	sp|P11046|LAMB1_DROME	P11046	LanB1	FBgn0261800	CG7123	12	12	12	25.3957	23.9906	23.8858	24.424	0	24.5062	0	8.16874	16.2553	0.117933
190	tr|M9PGG4|M9PGG4_DROME	M9PGG4	arm	FBgn0000117	CG11579	8	8	8	24.2682	0	24.474	16.2474	0	0	0	0	16.2474	0.116124
191	tr|Q9VXR5|Q9VXR5_DROME	Q9VXR5	Dmel\CG9281	FBgn0030672	CG9281	3	3	3	24.0914	24.215	24.2009	24.1691	0	23.7753	0	7.92508	16.244	0.109731
192	tr|M9PG22|M9PG22_DROME	M9PG22	Arf1	FBgn0010348	CG8385	3	3	2	24.7715	24.3729	25.2917	24.812	0	25.7135	0	8.57116	16.2409	0.131157
193	tr|M9PCU3|M9PCU3_DROME	M9PCU3	Dab	FBgn0000414	CG9695	5	5	5	24.4262	0	24.2913	16.2392	0	0	0	0	16.2392	0.11612
194	tr|A8JR03|A8JR03_DROME	A8JR03	kmr	FBgn0085412	CG34383	5	5	5	24.2616	0	24.4538	16.2385	0	0	0	0	16.2385	0.116123
195	tr|O46231|O46231_DROME	O46231	tmod	FBgn0082582	CG1539	2	2	2	23.6708	23.9502	24.1628	23.9279	0	23.0928	0	7.69759	16.2304	0.102706
196	tr|Q9VH76|Q9VH76_DROME	Q9VH76	Snap24	FBgn0266720	CG9474	3	3	2	0	24.3167	24.3516	16.2228	0	0	0	0	16.2228	0.116117
197	sp|O61722|PRL1_DROME	O61722	PRL-1	FBgn0024734	CG4993	4	4	4	24.1798	0	24.444	16.2079	0	0	0	0	16.2079	0.116128
198	tr|Q24090|Q24090_DROME	Q24090	Snr1	FBgn0011715	CG1064	5	5	5	23.928	24.1028	24.506	24.179	0	23.9725	0	7.99085	16.1881	0.112806
199	tr|A0A0B4LEV3|A0A0B4LEV3_DROME	A0A0B4LEV3	Dmel\CG8635	FBgn0033317	CG8635	5	5	5	24.1316	23.888	24.1219	24.0472	0	23.5866	0	7.86219	16.185	0.10864
200	tr|Q9VM12|Q9VM12_DROME	Q9VM12	Dmel\CG5958	FBgn0031913	CG5958	4	4	4	24.6756	24.2743	24.2903	24.4134	0	24.6859	0	8.22862	16.1848	0.120634
201	tr|M9NDM4|M9NDM4_DROME	M9NDM4	wds	FBgn0040066	CG17437	5	5	5	24.1363	0	24.3912	16.1758	0	0	0	0	16.1758	0.116128
202	tr|Q7JUS9|Q7JUS9_DROME	Q7JUS9	Mpcp1	FBgn0034497	CG9090	6	6	6	23.908	24.2949	24.2726	24.1585	0	23.9563	0	7.98544	16.173	0.112845
203	tr|Q7KSU6|Q7KSU6_DROME	Q7KSU6	anon-WO0118547.344	FBgn0037607	CG8036	8	8	8	24.5624	24.5787	24.4133	24.5181	0	25.0388	0	8.34627	16.1719	0.124724
204	tr|M9PFG7|M9PFG7_DROME	M9PFG7	Klc	FBgn0010235	CG5433	3	3	3	23.5444	23.9289	24.1104	23.8612	0	23.1229	0	7.70763	16.1536	0.104205
205	tr|A0A0B4KHZ1|A0A0B4KHZ1_DROME	A0A0B4KHZ1	Lsd-1	FBgn0039114	CG10374	6	6	6	24.5882	24.145	24.5586	24.4306	0	24.8388	0	8.27961	16.151	0.1229
206	tr|M9PBS9|M9PBS9_DROME	M9PBS9	Ist1	FBgn0035715	CG10103	6	6	6	24.1951	0	24.2368	16.144	0	0	0	0	16.144	0.116117
207	sp|Q9VR59|VIP1_DROME	Q9VR59	l(1)G0196	FBgn0027279	CG14616	6	6	6	24.3721	0	24.0223	16.1315	0	0	0	0	16.1315	0.116137
208	tr|Q8MKK5|Q8MKK5_DROME	Q8MKK5	kcc	FBgn0261794	CG5594	6	6	6	24.3562	0	24.0176	16.1246	0	0	0	0	16.1246	0.116136
209	tr|Q9VD52|Q9VD52_DROME	Q9VD52	CDC40	FBgn0038927	CG6015	9	9	9	24.1263	24.7668	24.4878	24.4603	0	25.0527	0	8.3509	16.1094	0.126021
210	tr|Q9VMI3|Q9VMI3_DROME	Q9VMI3	ND-51	FBgn0031771	CG9140	6	6	6	24.5455	24.4138	24.2521	24.4038	0	24.9004	0	8.30013	16.1036	0.124368
211	tr|Q8INW2|Q8INW2_DROME	Q8INW2	Hasp	FBgn0032797	CG10186	6	6	6	23.9687	0	24.2971	16.0886	0	0	0	0	16.0886	0.116135
212	tr|X2JKU5|X2JKU5_DROME	X2JKU5	RpS5a	FBgn0002590	CG8922	3	3	3	24.2875	24.0678	24.4039	24.2531	24.4961	0	0	8.16538	16.0877	0.120157
213	tr|Q9W1G7|Q9W1G7_DROME	Q9W1G7	Nap1	FBgn0015268	CG5330	3	3	3	24.2496	0	24.0004	16.0833	0	0	0	0	16.0833	0.116127
214	tr|D3DMM4|D3DMM4_DROME	D3DMM4	mfas	FBgn0260745	CG3359	8	8	8	24.3576	0	23.8787	16.0788	0	0	0	0	16.0788	0.116156
215	tr|Q9VRU0|Q9VRU0_DROME	Q9VRU0	Dmel\CG10469	FBgn0035678	CG10469	5	5	5	24.1645	24.6912	24.2312	24.3623	24.868	0	0	8.28932	16.073	0.124576
216	tr|Q7K4Y8|Q7K4Y8_DROME	Q7K4Y8	Dmel\CG1909	FBgn0039911	CG1909	6	6	6	23.8668	0	24.3504	16.0724	0	0	0	0	16.0724	0.116157
217	tr|Q9Y0Z1|Q9Y0Z1_DROME	Q9Y0Z1	Dmel\CG11970	FBgn0027503	CG11970	5	5	5	24.3235	0	23.8723	16.0653	0	0	0	0	16.0653	0.116151
218	sp|Q9W1B0|GEK_DROME	Q9W1B0	gek	FBgn0023081	CG4012	5	5	5	24.2661	0	23.8972	16.0544	0	0	0	0	16.0544	0.11614
219	tr|Q8SXX1|Q8SXX1_DROME	Q8SXX1	PIP4K	FBgn0039924	CG17471	4	4	4	24.0521	0	24.0978	16.05	0	0	0	0	16.05	0.116117
220	tr|Q76NQ9|Q76NQ9_DROME	Q76NQ9	AMPdeam	FBgn0052626	CG32626	5	5	5	23.8373	23.5179	23.8944	23.7499	0	23.1248	0	7.70828	16.0416	0.105922
221	tr|Q9VEP9|Q9VEP9_DROME	Q9VEP9	Sf3a1	FBgn0266917	CG16941	7	7	7	23.7016	0	24.4092	16.0369	0	0	0	0	16.0369	0.116203
222	tr|A1Z9L2|A1Z9L2_DROME	A1Z9L2	Rcd1	FBgn0033897	CG8233	6	6	6	24.1039	0	23.9965	16.0335	0	0	0	0	16.0335	0.116119
223	tr|A4V449|A4V449_DROME	A4V449	ND-75	FBgn0017566	CG2286	12	12	12	24.8086	24.2745	24.4377	24.5069	0	25.4289	0	8.47629	16.0306	0.131613
224	tr|M9NH51|M9NH51_DROME	M9NH51	U2af50	FBgn0005411	CG9998	4	4	4	24.1989	24.151	24.0059	24.1186	0	24.3084	0	8.1028	16.0158	0.119275
225	tr|Q8IR93|Q8IR93_DROME	Q8IR93	Dlic	FBgn0030276	CG1938	4	4	4	0	24.1061	23.931	16.0124	0	0	0	0	16.0124	0.116122
226	tr|Q8IMQ8|Q8IMQ8_DROME	Q8IMQ8	Dmel\CG6330	FBgn0039464	CG6330	3	3	3	24.0498	24.1338	24.0277	24.0704	0	24.201	0	8.06702	16.0034	0.118288
227	tr|Q6NP69|Q6NP69_DROME	Q6NP69	gfzf	FBgn0250732	CG33546	4	4	4	23.735	0	24.2689	16.0013	0	0	0	0	16.0013	0.116166
228	tr|Q9VDK2|Q9VDK2_DROME	Q9VDK2	Dmel\CG5466	FBgn0038815	CG5466	4	4	4	24.1092	0	23.8819	15.997	0	0	0	0	15.997	0.116125
229	tr|M9PGC4|M9PGC4_DROME	M9PGC4	sgg	FBgn0003371	CG2621	5	5	5	23.821	24.017	23.9846	23.9409	0	23.8585	0	7.95284	15.988	0.11476
230	tr|M9MRD9|M9MRD9_DROME	M9MRD9	PAPLA1	FBgn0031990	CG8552	4	4	4	24.0567	0	23.9016	15.9861	0	0	0	0	15.9861	0.116121
231	tr|M9PJQ5|M9PJQ5_DROME	M9PJQ5	wupA	FBgn0283471	CG7178	5	3	3	23.4282	24.248	24.3278	24.0013	0	24.0483	0	8.01609	15.9852	0.117067
232	tr|A1ZBB4|A1ZBB4_DROME	A1ZBB4	hnRNP U	FBgn0050122	CG30122	5	5	5	24.1715	23.8358	23.7778	23.9283	0	23.8802	0	7.96006	15.9683	0.115349
233	tr|Q9VZJ3|Q9VZJ3_DROME	Q9VZJ3	Rcd5	FBgn0263832	CG1135	6	6	6	23.5623	0	24.3049	15.9558	0	0	0	0	15.9558	0.116212
234	tr|Q9VQ94|Q9VQ94_DROME	Q9VQ94	Sec24CD	FBgn0262126	CG10882	4	4	4	23.8451	0	23.9394	15.9282	0	0	0	0	15.9282	0.116118
235	tr|Q9NF31|Q9NF31_DROME	Q9NF31	ph-d	FBgn0004860	CG3895	4	4	4	24.0293	0	23.7485	15.9259	0	0	0	0	15.9259	0.11613
236	tr|Q9VQV7|Q9VQV7_DROME	Q9VQV7	Cep97	FBgn0031575	CG3980	4	4	4	23.9221	0	23.8445	15.9222	0	0	0	0	15.9222	0.116118
237	sp|P06604|TBA2_DROME	P06604	alphaTub85E	FBgn0003886	CG9476	10	2	2	23.9171	23.8296	0	15.9156	0	0	0	0	15.9156	0.116118
238	sp|P26017|PC_DROME	P26017	Pc	FBgn0003042	CG32443	4	4	4	0	23.8643	23.8451	15.9031	0	0	0	0	15.9031	0.116117
239	tr|A0A6F7U5U6|A0A6F7U5U6_DROME	A0A6F7U5U6	pyd	FBgn0262614	CG43140	12	12	12	24.5321	24.3294	24.3146	24.3921	0	25.4849	0	8.49498	15.8971	0.134631
240	tr|Q94883|Q94883_DROME	Q94883	Dref	FBgn0015664	CG5838	4	4	4	23.663	0	24.0155	15.8928	0	0	0	0	15.8928	0.116138
241	tr|Q9VB81|Q9VB81_DROME	Q9VB81	Cpr97Eb	FBgn0039481	CG15884	2	2	2	24.618	0	22.9423	15.8534	0	0	0	0	15.8534	0.11661
242	tr|Q9VC36|Q9VC36_DROME	Q9VC36	polybromo	FBgn0039227	CG11375	7	7	7	24.0982	0	23.4611	15.8531	0	0	0	0	15.8531	0.116188
243	tr|A0A1W5Q009|A0A1W5Q009_DROME	A0A1W5Q009	Dmel\CG46301	FBgn0283651	CG46301	3	3	3	23.6466	0	23.8998	15.8488	0	0	0	0	15.8488	0.116128
244	tr|A0A0B4K686|A0A0B4K686_DROME	A0A0B4K686	CT33918	FBgn0261262	CG42613	4	4	4	23.5623	0	23.944	15.8355	0	0	0	0	15.8355	0.116142
245	tr|A4V1B2|A4V1B2_DROME	A4V1B2	Patj	FBgn0067864	CG12021	4	4	4	0	23.7953	23.6158	15.8037	0	0	0	0	15.8037	0.116122
246	tr|Q9XTL2|Q9XTL2_DROME	Q9XTL2	Stam	FBgn0027363	CG6521	2	2	2	23.6565	0	23.6663	15.7743	0	0	0	0	15.7743	0.116117
247	tr|E1JIM1|E1JIM1_DROME	E1JIM1	nsl1	FBgn0262527	CG4699	4	4	4	23.4136	0	23.8124	15.742	0	0	0	0	15.742	0.116145
248	tr|B5RIR1|B5RIR1_DROME	B5RIR1	nrv1	FBgn0015776	CG9258	4	4	4	24.143	23.4532	23.7103	23.7688	0	24.0818	0	8.02727	15.7416	0.121499
249	sp|Q9NHV9|VAV_DROME	Q9NHV9	Vav	FBgn0040068	CG7893	2	2	2	23.6414	0	23.5795	15.7403	0	0	0	0	15.7403	0.116117
250	tr|A0A0B4LH87|A0A0B4LH87_DROME	A0A0B4LH87	Pde6	FBgn0038237	CG8279	3	3	3	23.62	0	23.5757	15.7319	0	0	0	0	15.7319	0.116117
251	tr|Q9VSX2|Q9VSX2_DROME	Q9VSX2	BEST:GH12586	FBgn0035982	CG4461	3	3	3	23.8441	0	23.3299	15.7247	0	0	0	0	15.7247	0.116164
252	tr|Q95RL2|Q95RL2_DROME	Q95RL2	row	FBgn0033998	CG8092	4	4	4	23.4846	0	23.6363	15.707	0	0	0	0	15.707	0.116121
253	tr|A8JMD5|A8JMD5_DROME	A8JMD5	bma	FBgn0085385	CG34356	4	4	4	23.3617	0	23.7233	15.695	0	0	0	0	15.695	0.11614
254	tr|Q8SXM8|Q8SXM8_DROME	Q8SXM8	LysRS	FBgn0027084	CG12141	5	5	5	23.6218	23.7087	23.494	23.6082	0	23.7696	0	7.9232	15.685	0.118861
255	sp|Q9VI10|SMD2_DROME	Q9VI10	SmD2	FBgn0261789	CG1249	2	2	2	23.5109	23.8692	23.8314	23.7372	0	24.1662	0	8.05541	15.6818	0.123446
256	tr|A0A0B4LHC3|A0A0B4LHC3_DROME	A0A0B4LHC3	RhoGAP92B	FBgn0038747	CG4755	3	3	3	23.4252	0	23.6085	15.6779	0	0	0	0	15.6779	0.116123
257	tr|A0A0B4K6M7|A0A0B4K6M7_DROME	A0A0B4K6M7	Scm	FBgn0003334	CG9495	3	3	3	23.3764	0	23.6458	15.6741	0	0	0	0	15.6741	0.11613
258	tr|Q9VL89|Q9VL89_DROME	Q9VL89	und	FBgn0283478	CG4008	2	2	2	23.5043	23.6396	23.4904	23.5448	0	23.614	0	7.87134	15.6735	0.117294
259	tr|O62530|O62530_DROME	O62530	AP-2mu	FBgn0263351	CG7057	3	3	3	23.3764	0	23.5405	15.639	0	0	0	0	15.639	0.116121
260	tr|Q9W4Z0|Q9W4Z0_DROME	Q9W4Z0	PsGEF	FBgn0264598	CG43947	5	5	5	23.3094	0	23.5983	15.6359	0	0	0	0	15.6359	0.116132
261	tr|M9NE01|M9NE01_DROME	M9NE01	Pp2B-14D	FBgn0011826	CG9842	8	3	3	23.3041	0	23.5769	15.627	0	0	0	0	15.627	0.11613
262	tr|Q9V428|Q9V428_DROME	Q9V428	ics	FBgn0028546	CG9031	4	4	4	23.6435	0	23.1756	15.6064	0	0	0	0	15.6064	0.116156
263	tr|M9MRU9|M9MRU9_DROME	M9MRU9	Shab	FBgn0262593	CG43128	3	3	3	23.3547	0	23.4486	15.6011	0	0	0	0	15.6011	0.116118
264	sp|Q9V3C0|DDX41_DROME	Q9V3C0	abs	FBgn0015331	CG14637	4	4	4	23.2338	23.5563	0	15.5967	0	0	0	0	15.5967	0.116135
265	sp|Q9VVH3|MIC13_DROME	Q9VVH3	QIL1	FBgn0036726	CG7603	2	2	2	23.6235	23.4517	23.4838	23.5197	24.0126	0	0	8.00419	15.5155	0.124609
266	tr|A8JUY0|A8JUY0_DROME	A8JUY0	Rnp4F	FBgn0014024	CG3312	2	2	2	0	23.1516	23.2707	15.4741	0	0	0	0	15.4741	0.116119
267	tr|Q7K1W5|Q7K1W5_DROME	Q7K1W5	Dmel\CG8187	FBgn0034027	CG8187	2	2	2	23.263	0	23.0643	15.4424	0	0	0	0	15.4424	0.116124
268	tr|E1JIG1|E1JIG1_DROME	E1JIG1	neur	FBgn0002932	CG11988	3	3	3	23.0149	0	23.2828	15.4326	0	0	0	0	15.4326	0.11613
269	tr|E1JJS2|E1JJS2_DROME	E1JJS2	RhoGAP19D	FBgn0031118	CG1412	4	4	4	23.2105	0	22.9806	15.3971	0	0	0	0	15.3971	0.116126
270	tr|A0A0B4LFB3|A0A0B4LFB3_DROME	A0A0B4LFB3	eIF3m	FBgn0033902	CG8309	4	4	4	23.1478	0	23.0427	15.3968	0	0	0	0	15.3968	0.116119
271	sp|Q94901|LARK_DROME	Q94901	lark	FBgn0011640	CG8597	3	3	3	23.0892	0	23.0626	15.3839	0	0	0	0	15.3839	0.116117
272	tr|Q9W2L6|Q9W2L6_DROME	Q9W2L6	Dmel\CG9394	FBgn0034588	CG9394	2	2	2	23.115	0	23.0302	15.3817	0	0	0	0	15.3817	0.116118
273	tr|M9PBZ9|M9PBZ9_DROME	M9PBZ9	eIF4E1	FBgn0015218	CG4035	2	2	2	23.1822	0	22.8791	15.3537	0	0	0	0	15.3537	0.116134
274	tr|X2JB25|X2JB25_DROME	X2JB25	Yp2	FBgn0005391	CG2979	8	8	7	23.8505	24.3852	24.1388	24.1248	0	26.3344	0	8.77813	15.3467	0.155375
275	tr|M9NGK2|M9NGK2_DROME	M9NGK2	Sh	FBgn0003380	CG12348	3	3	3	22.9536	0	23.0161	15.3232	0	0	0	0	15.3232	0.116117
276	tr|M9NFR5|M9NFR5_DROME	M9NFR5	yps	FBgn0022959	CG5654	3	3	3	23.0275	23.4446	23.3217	23.2646	0	23.8573	0	7.95243	15.3121	0.126507
277	tr|E1JHV7|E1JHV7_DROME	E1JHV7	E(bx)	FBgn0000541	CG32346	2	2	2	23.0583	0	22.8182	15.2922	0	0	0	0	15.2922	0.116127
278	tr|A1Z6M0|A1Z6M0_DROME	A1Z6M0	Bap170	FBgn0042085	CG3274	3	3	3	23.0742	0	22.7374	15.2705	0	0	0	0	15.2705	0.116138
279	sp|P98149|DIF_DROME	P98149	Dif	FBgn0011274	CG6794	2	2	2	22.8139	0	22.8608	15.2249	0	0	0	0	15.2249	0.116117
280	sp|P35220|CTNA_DROME	P35220	alpha-Cat	FBgn0010215	CG17947	2	2	2	22.8335	0	22.8346	15.2227	0	0	0	0	15.2227	0.116117
281	sp|Q9VKD3|NFS1_DROME	Q9VKD3	Nfs1	FBgn0032393	CG12264	3	3	3	22.6129	23.1793	22.7777	22.8567	0	22.9899	0	7.66331	15.1933	0.118512
282	tr|Q8MRG6|Q8MRG6_DROME	Q8MRG6	Prp3	FBgn0036915	CG7757	2	2	2	22.6928	0	22.8191	15.1706	0	0	0	0	15.1706	0.11612
283	sp|Q24179|SLY1_DROME	Q24179	Slh	FBgn0264978	CG3539	2	2	2	22.7287	0	22.7334	15.154	0	0	0	0	15.154	0.116117
284	tr|Q9VPN5|Q9VPN5_DROME	Q9VPN5	Stip1	FBgn0024352	CG2720	2	2	2	22.9029	0	22.5485	15.1505	0	0	0	0	15.1505	0.116141
285	tr|Q9VH81|Q9VH81_DROME	Q9VH81	PpD3	FBgn0005777	CG8402	2	2	2	22.7116	0	22.6186	15.1101	0	0	0	0	15.1101	0.116118
286	tr|E1JHD6|E1JHD6_DROME	E1JHD6	bsk	FBgn0000229	CG5680	2	2	2	22.6001	0	22.5162	15.0388	0	0	0	0	15.0388	0.116118
287	tr|Q7JX87|Q7JX87_DROME	Q7JX87	Prx6c	FBgn0033518	CG11765	3	3	3	22.7882	0	22.247	15.0117	0	0	0	0	15.0117	0.116174
288	sp|Q8SX68|CT2NL_DROME	Q8SX68	Naus	FBgn0034308	CG10915	18	18	18	27.6576	28.4977	27.9558	28.0371	25.488	25.3725	0	16.9535	11.0835	0.261296
289	tr|Q7K304|Q7K304_DROME	Q7K304	Drep2	FBgn0028408	CG1975	13	13	13	28.0076	28.633	28.8262	28.4889	25.7208	26.5124	0	17.4111	11.0779	0.272435
290	tr|Q7KUX3|Q7KUX3_DROME	Q7KUX3	Septin4	FBgn0259923	CG9699	9	9	9	27.2996	27.279	27.7023	27.427	24.2988	25.1656	0	16.4881	10.9388	0.255469
291	tr|M9MRX4|M9MRX4_DROME	M9MRX4	Ank2	FBgn0261788	CG42734	55	55	53	28.3862	28.2101	28.3793	28.3252	0	27.2069	25.088	17.4316	10.8936	0.280503
292	tr|Q7KN85|Q7KN85_DROME	Q7KN85	ATPCL	FBgn0020236	CG8322	23	23	23	28.2674	27.955	28.5481	28.2568	25.506	26.7819	0	17.4293	10.8275	0.282381
293	sp|Q24210|CSKP_DROME	Q24210	CASK	FBgn0013759	CG6703	18	18	9	27.1069	27.1809	27.6634	27.3171	24.1628	26.061	0	16.7413	10.5758	0.276016
294	tr|M9PF36|M9PF36_DROME	M9PF36	DmTOM1	FBgn0035995	CG3529	8	8	8	27.1769	27.0379	27.528	27.2476	25.1644	25.2388	0	16.8011	10.4465	0.28163
295	tr|E2QD73|E2QD73_DROME	E2QD73	dnc	FBgn0000479	CG32498	15	15	3	27.2135	27.2997	27.7318	27.415	25.9727	25.9666	0	17.3131	10.1019	0.308119
296	tr|M9PEV2|M9PEV2_DROME	M9PEV2	Dmel\CG5087	FBgn0035953	CG5087	2	2	2	30.0245	0	29.9525	19.9923	0	30.7138	0	10.2379	9.75439	0.532849
297	tr|Q9VEV3|Q9VEV3_DROME	Q9VEV3	Dmel\CG14894	FBgn0038428	CG14894	8	8	8	26.5114	26.5697	26.8062	26.6291	25.0538	25.6113	0	16.8884	9.74074	0.313023
298	tr|E5DK16|E5DK16_DROME	E5DK16	Lpin	FBgn0263593	CG8709	16	16	16	26.5868	26.9646	26.7496	26.767	25.3488	26.3685	0	17.2391	9.52785	0.33129
299	tr|Q9VA36|Q9VA36_DROME	Q9VA36	cindr	FBgn0027598	CG31012	12	12	12	25.8645	25.9754	26.1806	26.0068	24.8256	25.0813	0	16.6356	9.3712	0.322951
300	tr|A0A0B4K6A1|A0A0B4K6A1_DROME	A0A0B4K6A1	BcDNA:GH02439	FBgn0027608	CG2082	4	4	4	25.3682	24.9831	25.1659	25.1724	23.9869	23.7585	0	15.9151	9.25725	0.309419
301	tr|A8DYJ3|A8DYJ3_DROME	A8DYJ3	CalpA	FBgn0012051	CG7563	6	6	5	27.025	0	27.4257	18.1502	0	26.8234	0	8.94112	9.20912	0.509786
302	tr|B5RIU6|B5RIU6_DROME	B5RIU6	EndoA	FBgn0038659	CG14296	4	4	4	24.7399	25.2691	25.5125	25.1738	24.1717	24.2411	0	16.1376	9.03618	0.32563
303	sp|P06002|OPS1_DROME	P06002	ninaE	FBgn0002940	CG4550	4	4	4	25.6655	25.5424	25.8403	25.6827	25.2556	24.715	0	16.6569	9.02588	0.339533
304	sp|P36188|TNNI_DROME	P36188	wupA	FBgn0283471	CG7178	8	8	6	26.3702	26.4526	26.823	26.5486	26.4744	26.8069	0	17.7604	8.78818	0.378451
305	tr|Q7K7G0|Q7K7G0_DROME	Q7K7G0	deltaCOP	FBgn0028969	CG14813	8	8	8	25.1612	25.3493	25.6848	25.3984	0	25.0755	24.8053	16.6269	8.77148	0.350986
306	tr|M9PDS8|M9PDS8_DROME	M9PDS8	sls	FBgn0086906	CG1915	16	16	16	26.6129	0	26.1538	17.5889	0	26.497	0	8.83234	8.75657	0.521094
307	tr|A0A0B4LHS1|A0A0B4LHS1_DROME	A0A0B4LHS1	Mlc1	FBgn0002772	CG5596	3	3	3	26.3738	0	25.9808	17.4515	0	0	26.1215	8.70715	8.74438	0.517271
308	sp|Q9U4G1|BDL_DROME	Q9U4G1	bdl	FBgn0028482	CG16857	9	9	9	25.6294	25.4033	25.724	25.5856	25.1238	25.4625	0	16.8621	8.72348	0.359323
309	tr|M9PFK6|M9PFK6_DROME	M9PFK6	Fbp1	FBgn0000639	CG17285	11	11	11	26.3726	0	24.0973	16.8233	0	24.3129	0	8.10431	8.71899	0.497515
310	tr|Q76NQ0|Q76NQ0_DROME	Q76NQ0	CG5364	FBgn0053303	CG33303	10	10	10	25.5399	25.5185	25.2917	25.45	0	25.1632	25.2784	16.8139	8.63614	0.362377
311	tr|Q8SZM2|Q8SZM2_DROME	Q8SZM2	Vajk2	FBgn0032538	CG16885	5	5	5	26.8998	25.514	25.3553	25.923	0	26.2132	25.709	17.3074	8.61565	0.376542
312	sp|Q9GU68|IF5A_DROME	Q9GU68	eEF5	FBgn0285952	CG3186	3	3	3	25.5533	0	25.3332	16.9622	0	25.0479	0	8.34931	8.61287	0.509317
313	tr|Q9V455|Q9V455_DROME	Q9V455	Kap-alpha3	FBgn0027338	CG9423	8	8	8	25.2007	25.0956	25.214	25.1701	24.6565	25.0224	0	16.5596	8.61047	0.357136
314	tr|Q9VBI2|Q9VBI2_DROME	Q9VBI2	Cmpk	FBgn0028833	CG6092	7	7	7	25.5523	25.4029	25.7682	25.5745	25.5263	25.4309	0	16.9857	8.58873	0.369118
315	tr|A0A6H2EGC1|A0A6H2EGC1_DROME	A0A6H2EGC1	gish	FBgn0250823	CG6963	9	9	9	25.0672	0	25.1865	16.7513	0	24.5112	0	8.17041	8.58084	0.504004
316	tr|A8DYL2|A8DYL2_DROME	A8DYL2	CG13498	FBgn0085399	CG34370	6	6	6	24.399	0	24.6688	16.3559	0	23.3708	0	7.79026	8.56565	0.490458
317	tr|Q7K2W6|Q7K2W6_DROME	Q7K2W6	PPO1	FBgn0283437	CG42639	19	19	19	26.4888	26.3924	25.5654	26.1489	26.086	26.7441	0	17.61	8.53887	0.387412
318	tr|M9PG47|M9PG47_DROME	M9PG47	RpS26	FBgn0261597	CG10305	3	3	3	26.0148	25.7382	26.6714	26.1415	26.0304	26.7803	0	17.6036	8.5379	0.387307
319	tr|Q8IPG9|Q8IPG9_DROME	Q8IPG9	Bsg	FBgn0261822	CG31605	5	5	5	0	24.8936	25.1246	16.6727	0	24.4243	0	8.14144	8.53129	0.504671
320	sp|Q9VZU4|NDUS3_DROME	Q9VZU4	ND-30	FBgn0266582	CG12079	8	8	8	25.506	25.2905	25.4105	25.4023	25.092	25.5876	0	16.8932	8.50915	0.370806
321	sp|Q24208|IF2G_DROME	Q24208	eIF2gamma	FBgn0263740	CG43665	6	6	6	24.7598	0	25.2157	16.6585	0	24.4986	0	8.16619	8.49233	0.506944
322	sp|P41093|RL18A_DROME	P41093	RpL18A	FBgn0010409	CG6510	5	5	5	24.9376	24.6872	25.0255	24.8834	24.6121	24.5845	0	16.3989	8.48458	0.359262
323	tr|A1ZA73|A1ZA73_DROME	A1ZA73	Strn-Mlck	FBgn0265045	CG44162	24	24	24	27.5006	25.2887	26.7108	26.5	27.1027	26.9482	0	18.0169	8.48308	0.400783
324	tr|M9MQH9|M9MQH9_DROME	M9MQH9	Pp2A-29B	FBgn0260439	CG17291	4	4	4	24.9722	0	24.9242	16.6321	0	24.6759	0	8.22532	8.40683	0.512052
325	tr|Q9I7I8|Q9I7I8_DROME	Q9I7I8	Orp8	FBgn0261550	CG42668	5	5	5	24.4111	0	24.479	16.2967	0	23.7131	0	7.90438	8.39229	0.500783
326	tr|A0A0B4LFD2|A0A0B4LFD2_DROME	A0A0B4LFD2	Hsc70-5	FBgn0001220	CG8542	6	6	6	25.0247	24.9275	24.78	24.9107	24.7598	24.8085	0	16.5228	8.38794	0.367392
327	sp|Q7KVQ0|GAR1_DROME	Q7KVQ0	CG4038	FBgn0011824	CG4038	5	5	5	25.8173	26.0117	26.0596	25.9629	26.4464	26.3455	0	17.5973	8.36556	0.395574
328	sp|P13496|DCTN1_DROME	P13496	DCTN1-p150	FBgn0001108	CG9206	10	10	10	24.6063	0	24.8254	16.4772	0	24.3376	0	8.11254	8.36468	0.509457
329	tr|O77062|O77062_DROME	O77062	Eaat1	FBgn0026439	CG3747	3	3	3	23.8508	0	25.2687	16.3732	0	24.0737	0	8.02458	8.34861	0.507047
330	tr|X2J6N7|X2J6N7_DROME	X2J6N7	Fas3	FBgn0000636	CG5803	3	3	3	24.4074	24.3211	24.2142	24.3142	23.884	24.0388	0	15.9743	8.33997	0.355369
331	tr|E1JJF9|E1JJF9_DROME	E1JJF9	Nrg	FBgn0264975	CG1634	12	12	12	25.441	0	25.2851	16.9087	0	25.7998	0	8.59992	8.30877	0.528724
332	tr|Q9VJ74|Q9VJ74_DROME	Q9VJ74	Dmel\CG10333	FBgn0032690	CG10333	13	13	13	25.071	0	24.9707	16.6806	0	25.1586	0	8.38619	8.29437	0.521782
333	tr|Q9VUC1|Q9VUC1_DROME	Q9VUC1	Hsp110	FBgn0026418	CG6603	7	7	7	24.4371	0	24.6033	16.3468	0	24.1725	0	8.0575	8.28928	0.51012
334	sp|Q9W1V3|FBRL_DROME	Q9W1V3	Fib	FBgn0003062	CG9888	7	7	7	26.094	25.8036	26.2122	26.0366	26.4751	26.7709	0	17.7487	8.28793	0.403275
335	tr|M9PBM1|M9PBM1_DROME	M9PBM1	U2af38	FBgn0017457	CG3582	3	3	3	24.9505	0	24.798	16.5828	0	24.9049	0	8.30163	8.2812	0.519252
336	sp|Q9VE00|C12A4_DROME	Q9VE00	Cyp12a4	FBgn0038681	CG6042	2	2	2	23.8127	0	24.0025	15.9384	0	22.9886	0	7.66288	8.27553	0.495757
337	sp|P21914|SDHB_DROME	P21914	SdhB	FBgn0014028	CG3283	4	4	4	25.0177	0	24.8322	16.6166	0	25.0402	0	8.34674	8.2699	0.521263
338	tr|M9MRT6|M9MRT6_DROME	M9MRT6	Rap1	FBgn0004636	CG1956	3	3	3	24.8466	25.1135	25.2882	25.0828	24.9419	25.5353	0	16.8257	8.25703	0.382067
339	tr|M9NE07|M9NE07_DROME	M9NE07	Dmel\CG9132	FBgn0030791	CG9132	3	3	3	24.2666	24.2696	24.4138	24.3167	24.1341	24.0454	0	16.0598	8.25685	0.361948
340	tr|Q9VVH5|Q9VVH5_DROME	Q9VVH5	UQCR-Q	FBgn0036728	CG7580	2	2	2	0	25.0381	24.5419	16.5266	0	24.8263	0	8.27545	8.2512	0.519417
341	tr|Q7KMQ0|Q7KMQ0_DROME	Q7KMQ0	Rpt1	FBgn0028687	CG1341	6	6	6	24.4533	0	24.3621	16.2718	0	24.0676	0	8.02253	8.24928	0.510262
342	tr|Q9V4E0|Q9V4E0_DROME	Q9V4E0	ND-49	FBgn0039909	CG1970	5	5	5	25.158	24.7927	24.7588	24.9032	24.8012	25.2215	0	16.6742	8.22891	0.379605
343	sp|Q94516|AT5F1_DROME	Q94516	ATPsynB	FBgn0019644	CG8189	8	8	8	25.2968	25.0655	25.2476	25.2033	25.2822	25.6457	0	16.976	8.22736	0.387334
344	tr|Q9I7R0|Q9I7R0_DROME	Q9I7R0	Apt1	FBgn0042138	CG18815	5	5	5	24.9408	25.0341	24.8198	24.9316	25.2293	24.9026	0	16.7107	8.22092	0.380902
345	tr|M9PB84|M9PB84_DROME	M9PB84	RpS2	FBgn0004867	CG5920	6	6	6	25.1817	24.9133	25.167	25.0873	24.9128	25.6992	0	16.8707	8.21667	0.385353
346	tr|Q0E8E8|Q0E8E8_DROME	Q0E8E8	Mpcp2	FBgn0026409	CG4994	2	2	2	24.1948	23.8889	0	16.0279	0	23.474	0	7.82465	8.20327	0.504535
347	tr|Q9VSK4|Q9VSK4_DROME	Q9VSK4	Dmel\CG6983	FBgn0035896	CG6983	3	3	3	24.4983	24.6503	24.4772	24.5419	24.5883	24.4398	0	16.3427	8.19921	0.372455
348	sp|P48148|RHO1_DROME	P48148	Rho1	FBgn0014020	CG8416	7	7	7	24.8456	25.4353	25.6082	25.2964	25.7368	25.5857	0	17.1075	8.18888	0.392769
349	sp|P17210|KINH_DROME	P17210	Khc	FBgn0001308	CG7765	9	9	9	24.3561	0	24.6903	16.3488	0	24.5043	0	8.16811	8.18068	0.518077
350	tr|Q7K5N8|Q7K5N8_DROME	Q7K5N8	BEST:GH19547	FBgn0034229	CG4847	6	6	6	25.2692	0	24.6016	16.6236	0	25.3568	0	8.45226	8.17133	0.528584
351	sp|Q9V3G1|RL8_DROME	Q9V3G1	RpL8	FBgn0261602	CG1263	4	4	4	24.5898	0	24.484	16.3579	0	24.6261	0	8.2087	8.14924	0.520674
352	tr|Q9VHT5|Q9VHT5_DROME	Q9VHT5	mRpL1	FBgn0037566	CG7494	7	7	7	24.7137	0	25.1036	16.6058	0	25.4442	0	8.48139	8.12437	0.531275
353	tr|B4F5U4|B4F5U4_DROME	B4F5U4	Spase25	FBgn0030306	CG1751	4	4	4	24.3592	0	23.9614	16.1068	0	23.9918	0	7.99726	8.10959	0.514406
354	tr|A4V303|A4V303_DROME	A4V303	CCT3	FBgn0015019	CG8977	7	7	7	24.382	0	24.4593	16.2804	0	24.5152	0	8.17174	8.10868	0.520814
355	tr|A0A0B4KEY5|A0A0B4KEY5_DROME	A0A0B4KEY5	l(2)efl	FBgn0011296	CG4533	3	3	3	24.8101	24.8125	24.4497	24.6908	0	24.8348	24.9638	16.5995	8.09126	0.384872
356	tr|Q95TZ7|Q95TZ7_DROME	Q95TZ7	Zasp66	FBgn0035917	CG6416	9	9	3	25.1584	25.2835	24.6568	25.0329	25.3038	25.5386	0	16.9475	8.08545	0.394149
357	tr|Q9VDC6|Q9VDC6_DROME	Q9VDC6	e	FBgn0000527	CG3331	4	4	4	23.9152	0	24.0655	15.9935	0	23.7303	0	7.91011	8.08342	0.5121
358	tr|Q9VJ12|Q9VJ12_DROME	Q9VJ12	Acn	FBgn0263198	CG10473	7	7	7	24.9419	24.993	24.8661	24.9337	25.4382	25.1161	0	16.8514	8.08226	0.391791
359	tr|Q9VZF9|Q9VZF9_DROME	Q9VZF9	Cpr64Ad	FBgn0035513	CG1259	4	4	4	24.7978	25.3304	0	16.7094	0	0	25.8991	8.63304	8.07634	0.538286
360	tr|Q9VT00|Q9VT00_DROME	Q9VT00	Jarid2	FBgn0036004	CG3654	7	7	7	24.0937	0	24.0083	16.034	0	23.9052	0	7.96839	8.06561	0.514927
361	sp|Q9VYG2|BAP60_DROME	Q9VYG2	Bap60	FBgn0025463	CG4303	5	5	5	23.6872	0	23.9742	15.8871	0	23.469	0	7.823	8.06414	0.509535
362	tr|A0A0B4LGM0|A0A0B4LGM0_DROME	A0A0B4LGM0	prom	FBgn0259210	CG42310	6	6	6	24.26	0	24.3481	16.2027	0	24.4828	0	8.16095	8.04178	0.522878
363	sp|Q9V3S0|CP4G1_DROME	Q9V3S0	Cyp4g1	FBgn0010019	CG3972	7	7	7	24.8412	0	23.864	16.2351	0	24.5847	0	8.1949	8.04019	0.524283
364	tr|Q7KLX3|Q7KLX3_DROME	Q7KLX3	Tapdelta	FBgn0021795	CG9035	3	3	3	24.9886	24.3969	24.4751	24.6202	24.8416	24.9101	0	16.5839	8.0363	0.387451
365	tr|Q9W0C3|Q9W0C3_DROME	Q9W0C3	Dmel\CG13928	FBgn0035246	CG13928	4	4	4	23.8706	24.4483	25.0173	24.4454	24.6104	24.6271	0	16.4125	8.03289	0.383416
366	tr|Q9VEK8|Q9VEK8_DROME	Q9VEK8	sds22	FBgn0028992	CG5851	4	4	4	23.8945	0	23.6961	15.8635	0	23.4991	0	7.83304	8.03051	0.511148
367	tr|A0A0B4LHV0|A0A0B4LHV0_DROME	A0A0B4LHV0	tau	FBgn0266579	CG45110	2	2	2	0	23.6607	23.5138	15.7248	0	23.0949	0	7.6983	8.02652	0.506154
368	tr|A0A0B4KFI7|A0A0B4KFI7_DROME	A0A0B4KFI7	Pfk	FBgn0003071	CG4001	9	9	9	25.4897	24.3618	25.4547	25.1021	25.3339	25.9047	0	17.0795	8.02254	0.401179
369	tr|Q9VEA7|Q9VEA7_DROME	Q9VEA7	Dmel\CG18598	FBgn0038589	CG18598	3	3	3	23.7901	0	23.6379	15.8093	0	23.3894	0	7.79648	8.01287	0.510411
370	tr|Q7JR58|Q7JR58_DROME	Q7JR58	Echs1	FBgn0033879	CG6543	5	5	5	25.076	24.8534	24.8685	24.9326	25.0848	25.6751	0	16.92	8.01268	0.397307
371	tr|Q9VT23|Q9VT23_DROME	Q9VT23	SP170	FBgn0036022	CG8329	3	3	3	0	23.7599	23.9466	15.9022	0	23.7195	0	7.90651	7.99567	0.5152
372	tr|Q2PDR9|Q2PDR9_DROME	Q2PDR9	vari	FBgn0250785	CG9326	7	7	7	24.3337	24.3467	24.2562	24.3122	24.1775	24.7915	0	16.323	7.98917	0.383167
373	tr|Q9VGA3|Q9VGA3_DROME	Q9VGA3	Dmel\CG4115	FBgn0038017	CG4115	4	4	4	24.7675	25.0823	24.142	24.664	24.9443	25.101	0	16.6817	7.98221	0.393003
374	tr|Q9VI66|Q9VI66_DROME	Q9VI66	CG2640	FBgn0051248	CG31248	5	5	5	23.9332	0	24.2086	16.0473	0	24.2091	0	8.0697	7.97756	0.521931
375	tr|X2J8Y6|X2J8Y6_DROME	X2J8Y6	Acp36DE	FBgn0011559	CG7157	2	2	2	24.4739	0	22.5678	15.6806	0	23.1248	0	7.70827	7.9723	0.509041
376	sp|Q9VWI0|NDUS4_DROME	Q9VWI0	ND-18	FBgn0031021	CG12203	3	3	3	24.3027	0	24.3835	16.2287	0	24.7724	0	8.25746	7.97128	0.528968
377	tr|Q9VJZ1|Q9VJZ1_DROME	Q9VJZ1	anon-WO0118547.80	FBgn0032514	CG9302	7	7	7	24.276	24.5457	24.1632	24.3283	24.6762	24.3953	0	16.3572	7.97113	0.384992
378	tr|M9PIG8|M9PIG8_DROME	M9PIG8	Rpn10	FBgn0015283	CG7619	4	4	4	23.9433	0	23.8218	15.9217	0	23.8784	0	7.95946	7.96225	0.518417
379	tr|A0A6M3QH40|A0A6M3QH40_DROME	A0A6M3QH40	CAP	FBgn0033504	CG18408	5	5	5	23.526	0	23.2296	15.5852	0	22.8853	0	7.62842	7.95678	0.506048
380	tr|E6PBV6|E6PBV6_DROME	E6PBV6	CG1354-RA	FBgn0030151	CG1354	5	5	5	24.0566	0	23.7671	15.9412	0	23.9615	0	7.98715	7.95406	0.51976
381	sp|Q9VN50|EI3F1_DROME	Q9VN50	eIF3f1	FBgn0037270	CG9769	4	4	4	23.8203	0	23.2757	15.6986	0	23.2348	0	7.74493	7.95372	0.510678
382	tr|Q9VW54|Q9VW54_DROME	Q9VW54	Rpn1	FBgn0028695	CG7762	4	4	4	23.7718	0	23.4699	15.7472	0	23.3859	0	7.79529	7.95194	0.512636
383	tr|Q9V3H9|Q9V3H9_DROME	Q9V3H9	Nab2	FBgn0028471	CG5720	5	5	5	23.3611	0	23.6217	15.6609	0	23.1436	0	7.71453	7.94637	0.509756
384	tr|Q9VHL2|Q9VHL2_DROME	Q9VHL2	CCT7	FBgn0037632	CG8351	4	4	4	23.9069	0	23.8079	15.905	0	23.8895	0	7.96316	7.94179	0.519316
385	sp|Q08012|GRAP_DROME	Q08012	drk	FBgn0004638	CG6033	3	3	3	23.2808	0	23.0328	15.4379	0	22.5159	0	7.50529	7.93257	0.50213
386	tr|Q9VEY5|Q9VEY5_DROME	Q9VEY5	Mic26-27	FBgn0038400	CG5903	3	3	3	24.1935	0	24.2554	16.1496	0	24.6525	0	8.2175	7.93211	0.52899
387	tr|Q8MKJ6|Q8MKJ6_DROME	Q8MKJ6	cg11777	FBgn0033527	CG11777	4	4	4	23.8674	0	23.82	15.8958	0	23.9088	0	7.96962	7.92618	0.520138
388	tr|A0A0B4KHG5|A0A0B4KHG5_DROME	A0A0B4KHG5	chp	FBgn0267435	CG1744	19	19	19	25.8375	25.2279	24.9765	25.3473	0	27.0713	25.1941	17.4218	7.92552	0.415379
389	tr|A0A0B4JD48|A0A0B4JD48_DROME	A0A0B4JD48	Cp1	FBgn0013770	CG6692	3	3	3	23.7439	24.284	24.0044	24.0107	24.1076	24.1498	0	16.0858	7.92494	0.380325
390	tr|Q9VQB4|Q9VQB4_DROME	Q9VQB4	Dmel\CG3609	FBgn0031418	CG3609	6	6	6	24.8576	24.471	24.5269	24.6185	24.9705	25.1133	0	16.6946	7.92393	0.396281
391	tr|M9PG76|M9PG76_DROME	M9PG76	RpLP0	FBgn0000100	CG7490	5	5	5	24.5337	0	24.0847	16.2062	0	24.8471	0	8.28236	7.92379	0.531652
392	tr|Q9VQD7|Q9VQD7_DROME	Q9VQD7	ND-B17.2	FBgn0031436	CG3214	3	3	3	24.3951	24.0665	23.8662	24.1093	24.2123	24.3685	0	16.1936	7.91567	0.383698
393	tr|M9PG55|M9PG55_DROME	M9PG55	Dmel\CG10600	FBgn0032717	CG10600	4	4	4	23.725	0	23.4906	15.7385	0	23.4885	0	7.8295	7.90904	0.515531
394	tr|A0A0B4LJ12|A0A0B4LJ12_DROME	A0A0B4LJ12	awd	FBgn0000150	CG2210	4	4	4	24.5014	0	24.261	16.2541	0	25.057	0	8.35234	7.9018	0.534947
395	tr|Q9VZE4|Q9VZE4_DROME	Q9VZE4	cg1316	FBgn0035526	CG1316	4	4	4	23.8819	0	23.714	15.8653	0	23.8909	0	7.96362	7.90168	0.520836
396	tr|A0A0C4DHG6|A0A0C4DHG6_DROME	A0A0C4DHG6	Gel	FBgn0010225	CG1106	3	3	3	0	23.8633	23.1118	15.6584	0	23.2902	0	7.76342	7.89498	0.513617
397	tr|Q7K3N4|Q7K3N4_DROME	Q7K3N4	Dmel\CG8888	FBgn0033679	CG8888	4	4	4	23.9435	0	23.7506	15.898	0	24.0292	0	8.00973	7.88832	0.523049
398	tr|Q9W0E4|Q9W0E4_DROME	Q9W0E4	Psa	FBgn0261243	CG1009	6	6	6	23.5201	0	23.4823	15.6675	0	23.3382	0	7.77941	7.88808	0.514409
399	tr|Q9VGZ3|Q9VGZ3_DROME	Q9VGZ3	Irp-1B	FBgn0024957	CG6342	4	4	4	23.7391	0	23.4207	15.72	0	23.499	0	7.833	7.88695	0.516498
400	tr|Q9VJ86|Q9VJ86_DROME	Q9VJ86	bsf	FBgn0284256	CG10302	6	6	6	23.9131	0	23.5584	15.8238	0	23.817	0	7.93902	7.88479	0.520566
401	tr|Q9VD29|Q9VD29_DROME	Q9VD29	Sar1	FBgn0038947	CG7073	4	4	4	23.9161	0	23.8278	15.9146	0	24.0926	0	8.03088	7.88375	0.523998
402	tr|A0A0B4KF46|A0A0B4KF46_DROME	A0A0B4KF46	Uba1	FBgn0023143	CG1782	7	7	7	23.71	0	23.3855	15.6985	0	23.4476	0	7.81586	7.88263	0.516012
403	sp|Q9VSL3|SEPIA_DROME	Q9VSL3	se	FBgn0086348	CG6781	5	5	5	24.2483	24.0699	0	16.1061	0	24.6782	0	8.22607	7.87999	0.531254
404	tr|O18333|O18333_DROME	O18333	Rab2	FBgn0014009	CG3269	5	5	5	24.0103	0	23.8223	15.9442	0	24.2216	0	8.07387	7.87032	0.526088
405	tr|Q9Y162|Q9Y162_DROME	Q9Y162	Vps4	FBgn0283469	CG6842	3	3	3	23.3243	0	23.2731	15.5325	0	22.9911	0	7.66372	7.86876	0.510697
406	tr|Q9VTV3|Q9VTV3_DROME	Q9VTV3	Ak1	FBgn0022709	CG17146	4	4	4	24.064	0	23.5709	15.8783	0	24.0353	0	8.01177	7.86653	0.52397
407	tr|A0A0B4K623|A0A0B4K623_DROME	A0A0B4K623	pug	FBgn0020385	CG4067	5	5	5	23.5965	0	23.6392	15.7452	0	23.6696	0	7.88986	7.85538	0.519817
408	tr|Q9VK69|Q9VK69_DROME	Q9VK69	CCT4	FBgn0032444	CG5525	4	4	4	23.7321	0	23.425	15.719	0	23.5925	0	7.86417	7.85485	0.518883
409	tr|Q9VPU7|Q9VPU7_DROME	Q9VPU7	aru	FBgn0029095	CG4276	4	4	4	23.3785	0	23.4198	15.5994	0	23.2403	0	7.74676	7.85267	0.514496
410	sp|Q9VWG3|RS10B_DROME	Q9VWG3	RpS10b	FBgn0285947	CG14206	2	2	2	24.1954	0	23.7145	15.97	0	24.3558	0	8.11858	7.85137	0.528462
411	tr|Q9VAY2|Q9VAY2_DROME	Q9VAY2	Gp93	FBgn0039562	CG5520	8	8	8	23.9967	0	23.7438	15.9135	0	24.2102	0	8.07007	7.84342	0.526966
412	tr|Q9VJL9|Q9VJL9_DROME	Q9VJL9	MET30	FBgn0028897	CG4935	4	4	4	23.4624	0	23.4707	15.6444	0	23.4078	0	7.80261	7.84177	0.517035
413	tr|Q95U34|Q95U34_DROME	Q95U34	Galk	FBgn0263199	CG5288	5	5	5	23.6249	0	23.7623	15.7957	0	23.8671	0	7.95571	7.84003	0.522861
414	tr|Q9VDV2|Q9VDV2_DROME	Q9VDV2	Dmel\CG6195	FBgn0038723	CG6195	2	2	2	22.8437	0	23.0132	15.2856	0	22.3743	0	7.45811	7.82753	0.504204
415	sp|P55841|RL14_DROME	P55841	RpL14	FBgn0017579	CG6253	3	3	3	23.9664	0	23.9004	15.9556	0	24.3971	0	8.13236	7.82324	0.529998
416	tr|Q9VT61|Q9VT61_DROME	Q9VT61	Ciz1	FBgn0027567	CG8108	3	3	3	24.4838	24.6092	24.8923	24.6618	25.3674	0	25.1584	16.8419	7.81986	0.405705
417	sp|Q9W2D9|EIF3K_DROME	Q9W2D9	eIF3k	FBgn0034654	CG10306	4	4	4	23.8863	0	24.0461	15.9775	0	24.4778	0	8.15928	7.81819	0.53117
418	tr|A0A126GUS7|A0A126GUS7_DROME	A0A126GUS7	Fmr1	FBgn0028734	CG6203	5	5	5	23.6402	0	23.4012	15.6805	0	23.5971	0	7.86569	7.81477	0.52045
419	tr|Q8IQZ1|Q8IQZ1_DROME	Q8IQZ1	Gss2	FBgn0030882/FBgn0052495	CG32495	3	3	3	23.1681	0	23.0144	15.3942	0	22.7682	0	7.58939	7.8048	0.51023
420	tr|Q9W2M4|Q9W2M4_DROME	Q9W2M4	Dmel\CG10527	FBgn0034583	CG10527	4	4	4	24.151	0	23.6556	15.9355	0	24.3996	0	8.13321	7.80233	0.530852
421	sp|Q7KUT2|LONM_DROME	Q7KUT2	Lon	FBgn0036892	CG8798	5	5	5	23.2823	0	23.2228	15.5017	0	23.1104	0	7.70346	7.79825	0.514895
422	tr|Q95T29|Q95T29_DROME	Q95T29	igl	FBgn0013467	CG18285	2	2	2	22.9231	0	23.0353	15.3195	0	22.5758	0	7.52528	7.79417	0.50812
423	tr|Q9VKX2|Q9VKX2_DROME	Q9VKX2	Mdh1	FBgn0262782	CG5362	3	3	3	24.0959	0	23.9518	16.0159	0	24.6689	0	8.22298	7.79292	0.534429
424	tr|A4V391|A4V391_DROME	A4V391	CCT1	FBgn0003676	CG5374	4	4	4	23.3527	0	23.3543	15.569	0	23.3365	0	7.77882	7.7902	0.518086
425	tr|E1JGZ9|E1JGZ9_DROME	E1JGZ9	Prosalpha1R	FBgn0050382	CG30382	3	3	3	23.4942	0	23.3709	15.6217	0	23.5109	0	7.83696	7.78476	0.5205
426	tr|Q8IP51|Q8IP51_DROME	Q8IP51	wb	FBgn0261563	CG42677	10	10	10	24.0526	0	24.0035	16.0187	0	24.7608	0	8.2536	7.76509	0.536585
427	tr|A0A0C4DHG9|A0A0C4DHG9_DROME	A0A0C4DHG9	Doa	FBgn0265998	CG42320	4	4	4	23.5317	0	23.517	15.6829	0	23.7857	0	7.92855	7.75436	0.525101
428	tr|A0A0B4KHU1|A0A0B4KHU1_DROME	A0A0B4KHU1	Rlip	FBgn0026056	CG11622	3	3	3	23.6893	0	23.4811	15.7235	0	23.9357	0	7.97857	7.74491	0.52733
429	sp|P35416|MYSP2_DROME	P35416	Prm	FBgn0003149	CG5939	16	3	3	23.7498	0	23.7028	15.8175	0	24.2391	0	8.07969	7.73785	0.531323
430	tr|Q9VK60|Q9VK60_DROME	Q9VK60	Dmel\CG6180	FBgn0032453	CG6180	5	5	5	24.0783	0	23.9932	16.0238	0	24.8863	0	8.29544	7.72838	0.539481
431	tr|A4V441|A4V441_DROME	A4V441	sn	FBgn0003447	CG32858	3	3	3	23.486	0	23.5298	15.6719	0	23.8455	0	7.94849	7.72346	0.527027
432	tr|Q9VAX8|Q9VAX8_DROME	Q9VAX8	Dmel\CG4849	FBgn0039566	CG4849	8	8	8	23.7373	23.6934	24.9294	24.12	24.37	24.833	0	16.401	7.719	0.400432
433	tr|M9ND19|M9ND19_DROME	M9ND19	Gale	FBgn0035147	CG12030	5	5	5	23.668	0	23.1815	15.6165	0	23.7257	0	7.90856	7.70793	0.526162
434	tr|Q9W2J5|Q9W2J5_DROME	Q9W2J5	Dmel\CG44245	FBgn0265180	CG44245	9	9	9	26.3457	24.2141	23.7746	24.7782	25.0645	0	26.1508	17.0718	7.70639	0.41979
435	tr|M9PET0|M9PET0_DROME	M9PET0	Gpdh1	FBgn0001128	CG9042	8	8	8	24.797	0	23.7674	16.1881	0	25.5019	0	8.50065	7.6875	0.548381
436	sp|Q7YU24|MARF_DROME	Q7YU24	Marf	FBgn0029870	CG3869	4	4	4	22.978	0	22.7961	15.258	0	22.7149	0	7.57163	7.68641	0.514066
437	tr|Q9I7J0|Q9I7J0_DROME	Q9I7J0	Dmel\CG5023	FBgn0038774	CG5023	4	4	4	23.9802	0	24.05	16.0101	0	24.9861	0	8.3287	7.68135	0.542467
438	tr|Q7KMP8|Q7KMP8_DROME	Q7KMP8	Rpn9	FBgn0028691	CG10230	4	4	4	23.2846	0	22.8049	15.3632	0	23.1027	0	7.70089	7.66229	0.520039
439	tr|Q95RB1|Q95RB1_DROME	Q95RB1	Dmel\CG14641	FBgn0037220	CG14641	3	3	3	23.3675	0	23.4902	15.6192	0	23.8802	0	7.96006	7.65917	0.529935
440	tr|Q59DP4|Q59DP4_DROME	Q59DP4	anon-EST:fe2A9	FBgn0250819	CG33521	6	6	6	23.6781	0	23.6558	15.778	0	24.4711	0	8.15703	7.62093	0.538646
441	tr|Q7KTA9|Q7KTA9_DROME	Q7KTA9	Gpo3	FBgn0028848	CG7311	6	6	6	23.9247	0	23.0532	15.6593	0	24.1154	0	8.03846	7.62084	0.534416
442	tr|X2JJD6|X2JJD6_DROME	X2JJD6	Dmel\CG2145	FBgn0030251	CG2145	7	7	7	23.6173	0	23.3074	15.6416	0	24.084	0	8.028	7.61358	0.534228
443	tr|Q9VQR2|Q9VQR2_DROME	Q9VQR2	ND-PDSW	FBgn0021967	CG8844	5	5	5	0	23.6672	23.46	15.7091	0	24.3095	0	8.10315	7.60592	0.537275
444	tr|Q9VJ28|Q9VJ28_DROME	Q9VJ28	L2HGDH	FBgn0032729	CG10639	4	4	4	23.2399	0	22.8752	15.3717	0	23.3104	0	7.77012	7.6016	0.525033
445	tr|A0A0B4LGC6|A0A0B4LGC6_DROME	A0A0B4LGC6	l(2)k09913	FBgn0021979	CG3082	4	4	4	0	23.7004	22.9739	15.5581	0	23.9272	0	7.97574	7.58234	0.533568
446	tr|Q9VXI1|Q9VXI1_DROME	Q9VXI1	Had1	FBgn0286508	CG9914	4	4	4	23.406	0	22.8882	15.4314	0	23.5698	0	7.85659	7.5748	0.529374
447	tr|Q8IQQ9|Q8IQQ9_DROME	Q8IQQ9	Afg3l2	FBgn0036702	CG6512	2	2	2	23.0116	0	22.7801	15.2639	0	23.0749	0	7.69164	7.57228	0.52316
448	tr|Q7JVZ8|Q7JVZ8_DROME	Q7JVZ8	GstE11	FBgn0034354	CG5224	2	2	2	22.6604	0	22.2204	14.9603	0	22.2407	0	7.41358	7.5467	0.513275
449	tr|A8JNR2|A8JNR2_DROME	A8JNR2	IRSp53	FBgn0052082	CG32082	3	3	3	22.6856	0	22.7539	15.1465	0	22.8244	0	7.60814	7.53834	0.52125
450	tr|Q9VXC9|Q9VXC9_DROME	Q9VXC9	SP99	FBgn0030773	CG9676	4	4	4	22.9483	0	22.8851	15.2778	0	23.4207	0	7.80691	7.47091	0.53155
451	tr|M9PH99|M9PH99_DROME	M9PH99	Gad1	FBgn0004516	CG14994	2	2	2	23.0887	0	22.7868	15.2918	0	23.5434	0	7.84782	7.44403	0.534175
452	tr|Q9VY91|Q9VY91_DROME	Q9VY91	Pdcd4	FBgn0030520	CG10990	3	3	3	22.7823	0	23.3529	15.3784	0	23.8976	0	7.96588	7.41253	0.539874
453	tr|Q8IN49|Q8IN49_DROME	Q8IN49	Dmel\CG31195	FBgn0051195	CG31195	4	4	4	22.9805	0	22.4934	15.158	0	23.2487	0	7.74957	7.4084	0.531887
454	tr|Q9VF66|Q9VF66_DROME	Q9VF66	Rbp	FBgn0262483	CG43073	23	23	23	29.134	28.8605	29.4528	29.1491	24.0493	24.4963	23.8299	24.1251	5.02395	4.24409e-05
455	sp|P31007|DLG1_DROME	P31007	dlg1	FBgn0001624	CG1725	36	36	5	29.6995	29.8879	30.1235	29.9036	25.4096	26.8363	25.5508	25.9322	3.97138	0.00107589
456	sp|Q7K0D8|NUP50_DROME	Q7K0D8	Nup50	FBgn0033264	CG2158	16	16	16	27.5601	27.899	27.8081	27.7557	24.2807	23.8101	24.9416	24.3441	3.41159	0.000576656
457	tr|E2QCY9|E2QCY9_DROME	E2QCY9	Syn	FBgn0004575	CG3985	25	25	25	29.3328	29.6188	29.7363	29.5627	26.3983	26.8404	25.7666	26.3351	3.22759	0.000640302
458	tr|Q8IQ62|Q8IQ62_DROME	Q8IQ62	sif	FBgn0085447	CG34418	31	31	6	28.2001	27.964	28.4291	28.1977	24.4287	25.6936	25.2581	25.1268	3.07091	0.0014693
459	tr|M9NGG5|M9NGG5_DROME	M9NGG5	futsch	FBgn0259108	CG34387	45	45	45	28.7179	28.6581	28.7767	28.7176	26.9115	27.352	25.093	26.4522	2.26538	0.0307137
460	sp|P13395|SPTCA_DROME	P13395	alpha-Spec	FBgn0250789	CG1977	46	46	46	27.8561	27.9243	27.7407	27.8403	24.7776	27.1307	24.9569	25.6217	2.21864	0.0429676
461	tr|A0A0B4LH71|A0A0B4LH71_DROME	A0A0B4LH71	Sap47	FBgn0013334	CG8884	11	11	11	29.118	29.0636	29.3939	29.1918	26.8787	27.393	27.2103	27.1607	2.03117	0.000366919
462	tr|Q9VQE0|Q9VQE0_DROME	Q9VQE0	Drp1	FBgn0026479	CG3210	17	17	17	27.2423	27.1891	27.2186	27.2167	25.5694	25.9298	25.02	25.5064	1.71029	0.00296555
463	sp|P54359|SEPT2_DROME	P54359	Septin2	FBgn0014029	CG4173	14	14	14	27.5901	27.8021	28.0492	27.8138	26.3268	26.2447	26.0891	26.2202	1.59361	0.000442472
464	tr|Q7JS69|Q7JS69_DROME	Q7JS69	nrv3	FBgn0032946	CG8663	8	8	8	28.8065	28.5411	28.7212	28.6896	27.2505	27.0982	27.378	27.2422	1.44739	0.000210627
465	sp|O61613|NMT_DROME	O61613	Nmt	FBgn0020392	CG7436	16	16	16	28.1583	28.0036	28.0047	28.0555	26.6225	26.8096	26.4008	26.611	1.44457	0.000360251
466	sp|P40797|PNUT_DROME	P40797	pnut	FBgn0013726	CG8705	17	17	17	27.9013	28.1542	28.335	28.1302	26.4654	26.6834	27.0049	26.7179	1.4123	0.00215866
467	tr|M9PF16|M9PF16_DROME	M9PF16	beta-Spec	FBgn0250788	CG5870	43	43	43	27.8402	27.7771	27.76	27.7924	26.2814	27.2643	25.7365	26.4274	1.36503	0.038065
468	tr|A4V134|A4V134_DROME	A4V134	CaMKII	FBgn0264607	CG18069	24	24	24	30.7146	30.7031	31.1001	30.8392	29.459	29.4168	29.5563	29.4774	1.36189	0.000572798
469	tr|Q9V3N7|Q9V3N7_DROME	Q9V3N7	CRMP	FBgn0023023	CG1411	20	20	20	30.0233	30.1529	30.3598	30.1787	28.9438	28.8103	28.9748	28.9096	1.26904	0.000325178
470	tr|M9NEL1|M9NEL1_DROME	M9NEL1	CanA-14F	FBgn0267912	CG9819	8	8	3	26.6283	26.6707	26.6092	26.6361	25.4786	25.3936	25.3725	25.4149	1.22117	5.12086e-06
471	tr|Q7KVX5|Q7KVX5_DROME	Q7KVX5	Vap33	FBgn0029687	CG5014	8	8	8	28.3405	28.118	28.4956	28.318	27.045	26.9423	27.3821	27.1232	1.19486	0.00226467
472	tr|E1JIR4|E1JIR4_DROME	E1JIR4	Atpalpha	FBgn0002921	CG5670	39	39	39	31.0902	30.6749	31.2868	31.0173	29.6215	30.2397	29.6464	29.8358	1.18145	0.0120417
473	tr|Q7KN75|Q7KN75_DROME	Q7KN75	Dp1	FBgn0027835	CG5170	21	21	21	26.0616	26.3439	26.7452	26.3836	24.7831	26.7273	24.5581	25.3562	1.02741	0.224964
474	sp|P91926|AP2A_DROME	P91926	AP-2alpha	FBgn0264855	CG4260	17	17	17	27.0954	26.7079	27.3966	27.0666	26.1204	26.575	25.437	26.0442	1.0225	0.0570992
475	tr|B7Z0L1|B7Z0L1_DROME	B7Z0L1	Fas1	FBgn0285925	CG6588	19	19	19	28.4223	28.2873	28.4932	28.4009	27.6694	27.8107	27.7453	27.7418	0.659103	0.0008293
476	sp|P21187|PABP_DROME	P21187	pAbp	FBgn0265297	CG5119	18	18	18	27.3371	27.2654	27.2927	27.2984	27.0155	27.0737	27.0805	27.0566	0.241837	0.00118046
477	tr|E1JJA4|E1JJA4_DROME	E1JJA4	shi	FBgn0003392	CG18102	31	31	31	28.7724	28.7444	29.0346	28.8505	28.1594	28.1995	28.2461	28.2017	0.648771	0.0024752
478	tr|Q7K3J0|Q7K3J0_DROME	Q7K3J0	CCT8	FBgn0284436	CG8258	24	24	24	30.2498	30.3237	30.537	30.3702	29.5661	29.6969	29.7577	29.6736	0.696586	0.00249429
479	tr|Q9VGQ1|Q9VGQ1_DROME	Q9VGQ1	alpha-KGDHC	FBgn0037891	CG5214	12	12	12	28.3667	28.3329	28.5337	28.4111	27.5301	27.7993	27.4312	27.5869	0.824245	0.00284927
480	tr|Q9VFV9|Q9VFV9_DROME	Q9VFV9	Droj2	FBgn0038145	CG8863	10	10	10	26.9664	27.0237	27.122	27.0374	26.1321	26.4859	26.3152	26.3111	0.726278	0.0028976
481	tr|A0A6M3Q7Q7|A0A6M3Q7Q7_DROME	A0A6M3Q7Q7	hts	FBgn0263391	CG43443	25	25	25	29.4924	29.5253	29.827	29.6149	28.7996	28.9607	28.8358	28.8654	0.749561	0.0030592
482	sp|P11147|HSP7D_DROME	P11147	Hsc70-4	FBgn0266599	CG4264	21	21	17	30.5284	30.4735	30.5616	30.5212	29.9292	30.1339	30.1393	30.0675	0.453695	0.00354713
483	tr|E1JIJ5|E1JIJ5_DROME	E1JIJ5	Vha55	FBgn0005671	CG17369	12	12	12	26.9038	26.7927	26.9431	26.8799	26.0655	26.4273	26.2177	26.2368	0.643044	0.00488416
484	tr|A8JQV2|A8JQV2_DROME	A8JQV2	Dmel\CG17816	FBgn0037525	CG17816	18	18	2	26.3632	26.511	26.5945	26.4896	25.5498	25.9796	25.7372	25.7555	0.734016	0.00658813
485	sp|P12370|KAPC1_DROME	P12370	Pka-C1	FBgn0000273	CG4379	8	8	8	25.8095	25.5578	25.6515	25.6729	24.7654	25.1896	25.0184	24.9911	0.681833	0.00894646
486	tr|M9NE89|M9NE89_DROME	M9NE89	Lam	FBgn0002525	CG6944	23	23	23	28.3061	28.6679	28.8614	28.6118	27.7147	27.9183	27.8222	27.8184	0.793415	0.0101452
487	tr|A0A0B4KHS9|A0A0B4KHS9_DROME	A0A0B4KHS9	Pp1alpha-96A	FBgn0003134	CG6593	11	11	3	27.5175	27.5843	27.6629	27.5882	27.2492	27.0755	27.3545	27.2264	0.361862	0.0167758
488	tr|Q9VRP3|Q9VRP3_DROME	Q9VRP3	Txl	FBgn0035631	CG5495	4	4	4	25.6277	25.6227	25.6786	25.643	25.3149	25.1196	25.4331	25.2892	0.353785	0.01914
489	tr|Q8IP94|Q8IP94_DROME	Q8IP94	ThrRS	FBgn0027081	CG5353	10	10	10	24.9563	24.9791	25.1021	25.0125	24.7909	24.6587	24.4922	24.6472	0.36524	0.0200633
490	tr|Q9VXQ5|Q9VXQ5_DROME	Q9VXQ5	CCT6	FBgn0027329	CG8231	9	9	9	25.4247	25.2262	25.2284	25.2931	24.9075	25.0763	24.7004	24.8947	0.398362	0.035009
491	sp|O61491|FLOT1_DROME	O61491	Flo1	FBgn0024754	CG8200	9	9	9	26.7195	26.5787	27.3215	26.8732	25.7583	26.0424	26.3794	26.0601	0.813171	0.0486195

## Sheet: Sheet2
	tr|X2JCS0|X2JCS0_DROME	tr|Q9W406|Q9W406_DROME	tr|A8JUZ7|A8JUZ7_DROME	tr|X2JIM3|X2JIM3_DROME
	tr|Q8IM86|Q8IM86_DROME	tr|H9XVP2|H9XVP2_DROME
	sp|X2JAU8|NWK_DROME
	tr|A1Z7V1|A1Z7V1_DROME	tr|A0A0B4K6V0|A0A0B4K6V0_DROME	tr|A8DY79|A8DY79_DROME	tr|A0A0B4K7K9|A0A0B4K7K9_DROME	tr|A0A0B4K7V8|A0A0B4K7V8_DROME	tr|A0A0B4K843|A0A0B4K843_DROME	tr|A0A0B4KF38|A0A0B4KF38_DROME
	sp|Q9VCH5|NUP98_DROME
	sp|Q24478|CP190_DROME
	sp|Q7JXF5|NUP62_DROME
	tr|Q9VS41|Q9VS41_DROME
	tr|Q0E9B2|Q0E9B2_DROME	tr|A1Z904|A1Z904_DROME	tr|A1Z906|A1Z906_DROME	tr|E2QCB7|E2QCB7_DROME	tr|A1Z907|A1Z907_DROME	tr|A0A0B4K6Z2|A0A0B4K6Z2_DROME	tr|A8DYB7|A8DYB7_DROME
	sp|Q9NHE5|CAPS_DROME
	sp|P13678|KPC3_DROME	tr|A0A0B4LI13|A0A0B4LI13_DROME	tr|Q4QQA3|Q4QQA3_DROME
	tr|A4V4W0|A4V4W0_DROME	sp|Q24211|STNA_DROME
	sp|Q9VXE6|NU153_DROME	tr|A8JV18|A8JV18_DROME
	tr|Q7PLI0|Q7PLI0_DROME
	tr|Q7KTW5|Q7KTW5_DROME
	tr|M9PD65|M9PD65_DROME	tr|M9PBD9|M9PBD9_DROME	sp|Q9VIW3|RAGP1_DROME
	tr|Q9W1D9|Q9W1D9_DROME	tr|A0A0B4LGH8|A0A0B4LGH8_DROME
	sp|Q9V6B9|NUP54_DROME
	tr|F2FBA6|F2FBA6_DROME	sp|Q24537|HMG2_DROME	tr|B7Z0Z0|B7Z0Z0_DROME
	tr|A0A0B4LF93|A0A0B4LF93_DROME	tr|A1Z928|A1Z928_DROME	tr|A1Z927|A1Z927_DROME	tr|A0A126GUN9|A0A126GUN9_DROME	tr|A0A0B4LF82|A0A0B4LF82_DROME	tr|Q5U0Y0|Q5U0Y0_DROME	tr|A0A0B4K765|A0A0B4K765_DROME
	tr|Q9VQ58|Q9VQ58_DROME
	sp|P51140|DSH_DROME
	tr|Q9VM93|Q9VM93_DROME	tr|M9PCR7|M9PCR7_DROME	tr|M9PCD4|M9PCD4_DROME	tr|M9PC73|M9PC73_DROME
	tr|Q9VWP8|Q9VWP8_DROME	tr|M9PHI8|M9PHI8_DROME
	sp|Q9VDV3|NUP58_DROME
	sp|Q9VDW3|DMDB_DROME	tr|A0A0B4KGB9|A0A0B4KGB9_DROME	tr|A0A0B4KGH0|A0A0B4KGH0_DROME	tr|A0A0B4KHR4|A0A0B4KHR4_DROME	sp|Q9VDW6|DMDA_DROME
	tr|Q9W1H5|Q9W1H5_DROME
	tr|Q2PDY2|Q2PDY2_DROME	sp|Q08605|GAGA_DROME	tr|A4V1Y6|A4V1Y6_DROME	tr|Q2PDY1|Q2PDY1_DROME	tr|M9PFM7|M9PFM7_DROME	tr|A4V1Y7|A4V1Y7_DROME
	tr|A4V1P2|A4V1P2_DROME	sp|Q9VSR3|ORB2_DROME	tr|A0A4D6K784|A0A4D6K784_DROME	tr|A0A4D6K616|A0A4D6K616_DROME
	sp|Q9GYU8|NUP88_DROME
	tr|Q9VZU7|Q9VZU7_DROME
	tr|M9PEM4|M9PEM4_DROME	tr|X2JC20|X2JC20_DROME	tr|M9PEB7|M9PEB7_DROME	tr|M9PHF2|M9PHF2_DROME	sp|Q9VZA4|BND7A_DROME	tr|Q9VZA5|Q9VZA5_DROME	tr|M9NF13|M9NF13_DROME
	tr|Q9VCE7|Q9VCE7_DROME	tr|Q8MRS5|Q8MRS5_DROME	tr|Q95R71|Q95R71_DROME
	tr|Q9VGL0|Q9VGL0_DROME
	sp|Q9VVI2|EDC3_DROME
	sp|O15943|CADN_DROME	tr|Q4ABE9|Q4ABE9_DROME	tr|Q4ABF0|Q4ABF0_DROME	tr|Q4ABE8|Q4ABE8_DROME	tr|Q4ABE7|Q4ABE7_DROME
	tr|E2QCQ3|E2QCQ3_DROME	tr|D0Z747|D0Z747_DROME	sp|Q960V3|MILT_DROME	tr|M9NDH7|M9NDH7_DROME
	tr|M9NDL7|M9NDL7_DROME	tr|Q8MQS4|Q8MQS4_DROME
	sp|Q7KQM6|GGYF1_DROME
	tr|M9PBU2|M9PBU2_DROME	sp|P48554|RAC2_DROME
	tr|M9PE74|M9PE74_DROME	tr|Q9W2U7|Q9W2U7_DROME
	tr|M9PI47|M9PI47_DROME	tr|M9PCC4|M9PCC4_DROME	tr|Q9XZ09|Q9XZ09_DROME	tr|Q8IQH9|Q8IQH9_DROME	tr|Q8IQI0|Q8IQI0_DROME
	tr|Q9W3J1|Q9W3J1_DROME
	sp|P42207|SEPT1_DROME
	tr|A0A0B4LF49|A0A0B4LF49_DROME	tr|Q8T5S9|Q8T5S9_DROME	tr|B7YZF0|B7YZF0_DROME	tr|A1Z8G0|A1Z8G0_DROME
	tr|Q9VPL6|Q9VPL6_DROME	tr|M9NEL3|M9NEL3_DROME	tr|M9NDB7|M9NDB7_DROME	tr|Q9VPL9|Q9VPL9_DROME	tr|M9NCY5|M9NCY5_DROME	tr|B7Z002|B7Z002_DROME
	tr|Q7KY08|Q7KY08_DROME	tr|Q32KD4|Q32KD4_DROME
	tr|Q0E976|Q0E976_DROME	tr|B7YZH1|B7YZH1_DROME
	sp|Q9V466|NU107_DROME
	sp|Q9VKJ1|MPND_DROME
	tr|Q9VE73|Q9VE73_DROME
	tr|A0A0S0X7W8|A0A0S0X7W8_DROME
	tr|Q8IMJ0|Q8IMJ0_DROME	tr|Q0KHY8|Q0KHY8_DROME
	sp|Q8SY33|GAWKY_DROME
	tr|E1JH51|E1JH51_DROME	sp|P25172|SUZ2_DROME	tr|A0A0B4KEM5|A0A0B4KEM5_DROME
	tr|Q8IQX3|Q8IQX3_DROME
	tr|Q7K180|Q7K180_DROME
	tr|A1ZAC7|A1ZAC7_DROME
	tr|A0A0B4LIF3|A0A0B4LIF3_DROME	sp|Q86NP2|NELFA_DROME	tr|A0A0B4KGH5|A0A0B4KGH5_DROME
	tr|Q9VCB6|Q9VCB6_DROME	tr|Q7K112|Q7K112_DROME	tr|Q8IMX1|Q8IMX1_DROME	tr|Q8IMX0|Q8IMX0_DROME
	tr|A1Z9M4|A1Z9M4_DROME	tr|A0A0B4LF29|A0A0B4LF29_DROME	tr|Q7KHK4|Q7KHK4_DROME	tr|A0A126GUP1|A0A126GUP1_DROME	tr|A8DYD3|A8DYD3_DROME	tr|A1Z9M3|A1Z9M3_DROME	tr|B7YZE6|B7YZE6_DROME	tr|A0A0B4LFC7|A0A0B4LFC7_DROME	tr|A8DYD2|A8DYD2_DROME	tr|A8DYD1|A8DYD1_DROME
	tr|Q9VKM2|Q9VKM2_DROME	tr|M9PCP4|M9PCP4_DROME	tr|M9NCT2|M9NCT2_DROME	tr|H5V8D0|H5V8D0_DROME	tr|X2J5L4|X2J5L4_DROME	tr|F2FB81|F2FB81_DROME
	sp|Q94517|HDAC1_DROME
	sp|Q9VG73|ILF2_DROME
	tr|Q9W5C1|Q9W5C1_DROME
	tr|Q9W414|Q9W414_DROME
	tr|A0A0B4KED3|A0A0B4KED3_DROME	tr|A8DY50|A8DY50_DROME	tr|A0A0B4KEE8|A0A0B4KEE8_DROME	tr|A0A0B4K7T1|A0A0B4K7T1_DROME	tr|A0A0B4K7H4|A0A0B4K7H4_DROME	tr|A0A0B4JCQ4|A0A0B4JCQ4_DROME	tr|A1Z6S0|A1Z6S0_DROME	tr|A0A0B4JCZ8|A0A0B4JCZ8_DROME	tr|A0A0B4KEU9|A0A0B4KEU9_DROME	tr|E1JGY9|E1JGY9_DROME	tr|A0A0B4JD47|A0A0B4JD47_DROME	tr|A0A0B4K822|A0A0B4K822_DROME	tr|A0A0B4KEK0|A0A0B4KEK0_DROME
	tr|Q9VXA3|Q9VXA3_DROME
	tr|Q9W1I8|Q9W1I8_DROME
	sp|Q9I7T7|LAR4_DROME
	tr|Q8IN90|Q8IN90_DROME	tr|Q5BIJ2|Q5BIJ2_DROME	tr|Q0KI58|Q0KI58_DROME	tr|A0A0B4KHP7|A0A0B4KHP7_DROME	tr|B7Z0L6|B7Z0L6_DROME	tr|A0A0B4KHB9|A0A0B4KHB9_DROME	tr|Q9VEC6|Q9VEC6_DROME	tr|Q8IN89|Q8IN89_DROME	tr|B7Z0L7|B7Z0L7_DROME
	tr|E1JIQ2|E1JIQ2_DROME	tr|E1JIQ1|E1JIQ1_DROME	tr|A0A0B4LHB7|A0A0B4LHB7_DROME	tr|A0A0B4LHB9|A0A0B4LHB9_DROME	sp|Q94900|GLUCL_DROME	tr|A0A0B4KHS0|A0A0B4KHS0_DROME	tr|A0A0B4LID6|A0A0B4LID6_DROME	tr|Q0IGX3|Q0IGX3_DROME
	tr|E1JGK7|E1JGK7_DROME	sp|Q7KRI2|LOLAL_DROME
	sp|P45889|ACTZ_DROME
	tr|A1Z8M2|A1Z8M2_DROME	tr|A0A0B4KFE3|A0A0B4KFE3_DROME	tr|A0A0B4KEM1|A0A0B4KEM1_DROME	tr|A8DYA3|A8DYA3_DROME
	tr|A0A0B4KI71|A0A0B4KI71_DROME	tr|Q8IMF5|Q8IMF5_DROME	sp|P23226|MA205_DROME
	tr|A2VEJ9|A2VEJ9_DROME	tr|A0A0B4LH25|A0A0B4LH25_DROME	tr|Q9W2K4|Q9W2K4_DROME	tr|A8DYK5|A8DYK5_DROME
	tr|Q59DP7|Q59DP7_DROME	tr|Q6NNV2|Q6NNV2_DROME	tr|Q9V4C4|Q9V4C4_DROME	tr|H9XVN2|H9XVN2_DROME
	tr|A0A0B4LJ24|A0A0B4LJ24_DROME	tr|A0A0B4K7G3|A0A0B4K7G3_DROME	tr|A0A0B4K6W5|A0A0B4K6W5_DROME	sp|Q9V9S7|SYDE_DROME	tr|A0A0B4K813|A0A0B4K813_DROME	tr|A0A0B4K7S3|A0A0B4K7S3_DROME
	sp|Q24212|STNB_DROME	tr|X2JGF5|X2JGF5_DROME	tr|X2JCY4|X2JCY4_DROME
	sp|A0A0B4K7J2|RBP2_DROME
	tr|E3CTP7|E3CTP7_DROME	tr|Q8MMD3|Q8MMD3_DROME	tr|Q8MMD2|Q8MMD2_DROME	tr|Q9W111|Q9W111_DROME
	tr|M9PDC7|M9PDC7_DROME	tr|Q8INU2|Q8INU2_DROME	tr|M9PBF6|M9PBF6_DROME	tr|Q1WWC9|Q1WWC9_DROME	tr|Q9VIF7|Q9VIF7_DROME	tr|M9ND00|M9ND00_DROME
	tr|X2JIZ6|X2JIZ6_DROME	tr|M9NG38|M9NG38_DROME	tr|X2JCZ1|X2JCZ1_DROME	tr|M9PJD0|M9PJD0_DROME	tr|M9NEZ2|M9NEZ2_DROME	tr|E2QD98|E2QD98_DROME	tr|Q6NR03|Q6NR03_DROME	tr|Q0KHU9|Q0KHU9_DROME	tr|Q9W3H8|Q9W3H8_DROME	tr|Q9W3H6|Q9W3H6_DROME	tr|Q7KVT3|Q7KVT3_DROME	tr|Q9W3H7|Q9W3H7_DROME
	sp|Q9W1X4|NU214_DROME
	tr|A0A0B4K620|A0A0B4K620_DROME	tr|Q8IPN9|Q8IPN9_DROME	tr|A0A0B4K6S8|A0A0B4K6S8_DROME	tr|Q9VNA2|Q9VNA2_DROME	tr|Q0KIB9|Q0KIB9_DROME	tr|Q9VNA1|Q9VNA1_DROME	tr|A4V2F2|A4V2F2_DROME	tr|B7Z0T3|B7Z0T3_DROME	tr|Q8MSQ5|Q8MSQ5_DROME	tr|Q7KNC5|Q7KNC5_DROME	tr|Q4ABH3|Q4ABH3_DROME	tr|A0A0B4K699|A0A0B4K699_DROME	tr|A0A0B4KF88|A0A0B4KF88_DROME	tr|Q8IPN8|Q8IPN8_DROME	tr|B7Z0T6|B7Z0T6_DROME
	tr|Q7KJA9|Q7KJA9_DROME
	tr|M9PGM6|M9PGM6_DROME	tr|M9PIP8|M9PIP8_DROME	tr|M9PGF5|M9PGF5_DROME	tr|M9NFQ4|M9NFQ4_DROME	sp|Q7KW14|CCDCX_DROME	tr|M9PG86|M9PG86_DROME	tr|M9PDH4|M9PDH4_DROME	tr|M9NEP4|M9NEP4_DROME	tr|M9NGH0|M9NGH0_DROME	tr|M9NE32|M9NE32_DROME
	sp|Q9TVP3|JDP_DROME
	tr|A0A0B4KFC5|A0A0B4KFC5_DROME	tr|A0A126GUM8|A0A126GUM8_DROME	tr|A0A0B4K7U5|A0A0B4K7U5_DROME	tr|E1JH02|E1JH02_DROME	sp|Q86S05|LIG_DROME	tr|D0Z768|D0Z768_DROME	tr|A0A0B4K6T1|A0A0B4K6T1_DROME
	tr|Q8SYD9|Q8SYD9_DROME	tr|Q8T389|Q8T389_DROME	tr|A8DYJ1|A8DYJ1_DROME	tr|A8DYJ0|A8DYJ0_DROME
	tr|Q0E8S7|Q0E8S7_DROME	tr|O96607|O96607_DROME	tr|Q9VM94|Q9VM94_DROME	tr|M9PB54|M9PB54_DROME	tr|M9PEX1|M9PEX1_DROME
	sp|Q9V4C8|HCF_DROME
	sp|Q9VI75|PICAL_DROME	tr|A0A0B4K603|A0A0B4K603_DROME	tr|A0A0B4K6V2|A0A0B4K6V2_DROME	tr|A0A0B4KF90|A0A0B4KF90_DROME	tr|A0A0B4K631|A0A0B4K631_DROME	tr|A0A0B4KGC6|A0A0B4KGC6_DROME	tr|B7Z0U7|B7Z0U7_DROME	tr|A0A0B4KFE2|A0A0B4KFE2_DROME	tr|E1JJ78|E1JJ78_DROME
	tr|X2JC31|X2JC31_DROME	sp|P29742|CLH_DROME
	tr|M9PH86|M9PH86_DROME	tr|M9NDY9|M9NDY9_DROME	tr|M9NH46|M9NH46_DROME	tr|B7Z0Y2|B7Z0Y2_DROME	tr|M9PER2|M9PER2_DROME	tr|Q9VXL1|Q9VXL1_DROME	tr|X2JE21|X2JE21_DROME	tr|Q7KUY7|Q7KUY7_DROME
	tr|Q9W392|Q9W392_DROME
	tr|Q9Y134|Q9Y134_DROME
	tr|Q8IMC1|Q8IMC1_DROME	tr|Q9V4E7|Q9V4E7_DROME
	tr|E1JHT6|E1JHT6_DROME	tr|Q9VMV9|Q9VMV9_DROME
	tr|Q9VPX6|Q9VPX6_DROME	tr|Q9VPX7|Q9VPX7_DROME
	sp|Q9VX32|RG190_DROME	tr|M9PHG0|M9PHG0_DROME	tr|M9PHY4|M9PHY4_DROME	tr|M9PHV3|M9PHV3_DROME	tr|M9PJQ3|M9PJQ3_DROME
	tr|Q9VK85|Q9VK85_DROME	tr|M9PD08|M9PD08_DROME
	tr|Q9W3Y3|Q9W3Y3_DROME
	tr|A1ZBL9|A1ZBL9_DROME	tr|Q9V8V8|Q9V8V8_DROME	tr|A1ZBL5|A1ZBL5_DROME	tr|E1JGM9|E1JGM9_DROME	tr|Q963E6|Q963E6_DROME	tr|Q6NPA6|Q6NPA6_DROME	tr|E1JGN0|E1JGN0_DROME	tr|A1ZBL7|A1ZBL7_DROME	tr|Q7YU80|Q7YU80_DROME	tr|Q963E5|Q963E5_DROME
	sp|Q24368|ISWI_DROME
	tr|Q86BS3|Q86BS3_DROME
	tr|Q9VP57|Q9VP57_DROME
	sp|A0A0B4KGY6|NOVA_DROME
	sp|Q9VH07|RUVB1_DROME
	tr|Q7K012|Q7K012_DROME
	tr|R9PY70|R9PY70_DROME	tr|M9PDE6|M9PDE6_DROME	tr|Q9V9N5|Q9V9N5_DROME	tr|M9PDY6|M9PDY6_DROME	tr|M9PDL8|M9PDL8_DROME	tr|A8DZ24|A8DZ24_DROME	tr|Q9V9N7|Q9V9N7_DROME	tr|M9PBG0|M9PBG0_DROME	tr|A8DZ25|A8DZ25_DROME	tr|M9MSJ5|M9MSJ5_DROME
	tr|X2JC94|X2JC94_DROME	sp|O46084|PGAM5_DROME
	sp|Q9W4P5|VA0D1_DROME
	tr|A0A0B4LGZ5|A0A0B4LGZ5_DROME	sp|P46222|RL11_DROME
	tr|M9NE68|M9NE68_DROME	sp|P02516|HSP23_DROME
	tr|Q8IML5|Q8IML5_DROME	tr|Q8IML3|Q8IML3_DROME	tr|Q8IML4|Q8IML4_DROME	tr|Q6NLA3|Q6NLA3_DROME	tr|Q9XZ10|Q9XZ10_DROME
	tr|Q9VHX9|Q9VHX9_DROME	tr|A0A0B4KFA6|A0A0B4KFA6_DROME	tr|A0A0B4KGE4|A0A0B4KGE4_DROME
	tr|A0A0B4JDA0|A0A0B4JDA0_DROME	tr|Q9VF03|Q9VF03_DROME
	tr|Q9W5R5|Q9W5R5_DROME
	tr|A4V201|A4V201_DROME	tr|E1JI11|E1JI11_DROME	sp|P47825|TAF4_DROME	tr|M9PFP3|M9PFP3_DROME	tr|M9PI76|M9PI76_DROME	tr|B7Z060|B7Z060_DROME
	sp|Q9XY35|QCR9_DROME
	sp|O18373|SPS1_DROME
	tr|Q7K188|Q7K188_DROME
	sp|A1Z9E2|LIN54_DROME	tr|E1JH59|E1JH59_DROME
	tr|L0MLN1|L0MLN1_DROME	tr|L0MPN7|L0MPN7_DROME	tr|L0MN72|L0MN72_DROME	sp|Q8IMC6|ASATR_DROME	tr|L0MPX5|L0MPX5_DROME	tr|Q9V4D6|Q9V4D6_DROME
	tr|Q9VVA6|Q9VVA6_DROME
	sp|Q23983|SNAP_DROME
	tr|Q9VJH2|Q9VJH2_DROME	tr|M9PDL2|M9PDL2_DROME
	tr|M9PDW0|M9PDW0_DROME	tr|Q86BQ0|Q86BQ0_DROME	tr|Q9W0C1|Q9W0C1_DROME	tr|Q9W0C2|Q9W0C2_DROME	tr|M9PE71|M9PE71_DROME
	tr|A0A0B4KH34|A0A0B4KH34_DROME	sp|P22464|ANXB9_DROME
	tr|Q9VDH3|Q9VDH3_DROME
	sp|P25455|PIP1_DROME
	tr|O61380|O61380_DROME	tr|A8DZ29|A8DZ29_DROME
	sp|Q7KN62|TERA_DROME	tr|A0A0B4LFZ4|A0A0B4LFZ4_DROME
	tr|Q7KUB0|Q7KUB0_DROME	tr|Q8IQA7|Q8IQA7_DROME	tr|Q9VSI6|Q9VSI6_DROME	tr|Q7KUB1|Q7KUB1_DROME	tr|B7Z0E0|B7Z0E0_DROME
	sp|Q9VVB4|CCD22_DROME
	tr|Q9VB05|Q9VB05_DROME
	sp|P81900|KAPR2_DROME
	sp|Q9VEN1|FLNA_DROME	tr|A0A0B4JCY6|A0A0B4JCY6_DROME	tr|Q7KSF4|Q7KSF4_DROME	tr|A0A0B4KGT8|A0A0B4KGT8_DROME	tr|A0A0B4KG47|A0A0B4KG47_DROME	tr|A0A0B4KHN1|A0A0B4KHN1_DROME	tr|A0A0B4KGB3|A0A0B4KGB3_DROME	tr|A4V310|A4V310_DROME	tr|B7Z0L2|B7Z0L2_DROME
	sp|Q27331|VATA2_DROME	tr|A4V0N4|A4V0N4_DROME
	sp|Q8IH18|4ET_DROME
	tr|A0A0B4KHJ5|A0A0B4KHJ5_DROME	sp|Q9VFC8|GYS_DROME
	tr|M9NDP1|M9NDP1_DROME	tr|M9NDC7|M9NDC7_DROME	sp|Q24117|DYL1_DROME	sp|O96860|DYL2_DROME	tr|A0A4D6K1L3|A0A4D6K1L3_DROME
	tr|Q9VV52|Q9VV52_DROME
	tr|M9PG32|M9PG32_DROME	sp|P49847|TAF6_DROME
	sp|Q27268|DX39B_DROME	tr|M9PC90|M9PC90_DROME
	tr|X2JD89|X2JD89_DROME	tr|Q7KQP6|Q7KQP6_DROME	tr|D1YSG0|D1YSG0_DROME	tr|L0MPZ1|L0MPZ1_DROME	tr|L0MN91|L0MN91_DROME
	tr|Q59E23|Q59E23_DROME	tr|M9PBV1|M9PBV1_DROME	sp|P17276|PH4H_DROME
	tr|M9PJN3|M9PJN3_DROME	tr|M9NEH3|M9NEH3_DROME	tr|A0A1Z1CGY3|A0A1Z1CGY3_DROME	sp|Q9VXY2|MADD_DROME	tr|A0A0S0X7U5|A0A0S0X7U5_DROME	tr|A0A1Z1CGX2|A0A1Z1CGX2_DROME	tr|A8JUX2|A8JUX2_DROME	tr|M9NGF2|M9NGF2_DROME	tr|A0A1Z1CSK9|A0A1Z1CSK9_DROME	tr|M9PEM6|M9PEM6_DROME
	tr|B7YZI0|B7YZI0_DROME	sp|Q9V7N5|VATC_DROME
	sp|P23128|DDX6_DROME
	tr|Q9VLQ9|Q9VLQ9_DROME	tr|M9NDI3|M9NDI3_DROME
	tr|Q9VM11|Q9VM11_DROME
	tr|E2QD63|E2QD63_DROME	sp|Q86DS1|F10A2_DROME	sp|C4NYP8|F10A1_DROME
	tr|X2J9V9|X2J9V9_DROME	tr|Q29QE1|Q29QE1_DROME	tr|X2JC00|X2JC00_DROME
	tr|A0A126GV04|A0A126GV04_DROME	sp|Q24547|STX1A_DROME	tr|A0A0B4JCZ4|A0A0B4JCZ4_DROME
	tr|A0A0B4LIJ0|A0A0B4LIJ0_DROME	sp|P48601|PRS4_DROME
	tr|Q8T6I0|Q8T6I0_DROME	tr|Q8T8W3|Q8T8W3_DROME
	tr|Q9VKZ8|Q9VKZ8_DROME
	sp|O18413|PRS8_DROME
	tr|Q9VNC3|Q9VNC3_DROME	tr|A0A0B4LGM5|A0A0B4LGM5_DROME	tr|A0A0B4KF92|A0A0B4KF92_DROME	tr|A0A0B4LGS6|A0A0B4LGS6_DROME
	sp|B7YZV4|PDE1_DROME	tr|X2BZJ7|X2BZJ7_DROME	tr|B7YZV1|B7YZV1_DROME	tr|M9PDA0|M9PDA0_DROME	tr|B7YZV2|B7YZV2_DROME	tr|M9NF02|M9NF02_DROME	tr|B7YZV3|B7YZV3_DROME
	tr|Q9VPE2|Q9VPE2_DROME
	tr|X2JDI1|X2JDI1_DROME	sp|P23696|PP2A_DROME
	tr|Q7JMV3|Q7JMV3_DROME	tr|A4V110|A4V110_DROME
	tr|Q9V470|Q9V470_DROME
	sp|Q9VHD2|MAAI2_DROME
	tr|Q59E30|Q59E30_DROME	sp|Q95RI5|FAXC_DROME	tr|M9PFH6|M9PFH6_DROME	tr|M9PFW1|M9PFW1_DROME	tr|Q59E29|Q59E29_DROME	tr|Q86BI4|Q86BI4_DROME
	sp|A1Z9G2|SYF1_DROME
	sp|P42284|LOLA2_DROME	sp|Q7KQZ4|LOLA3_DROME	sp|Q9V5M3|LOLA6_DROME	sp|P42283|LOLA1_DROME	sp|Q9V5M6|LOLA5_DROME	sp|Q867Z4|LOLA4_DROME
	tr|A8JQT5|A8JQT5_DROME
	tr|Q9VT32|Q9VT32_DROME	tr|M9PEY1|M9PEY1_DROME	tr|M9PEP5|M9PEP5_DROME	tr|M9PHW7|M9PHW7_DROME	tr|M9PF46|M9PF46_DROME	tr|Q9VT33|Q9VT33_DROME
	sp|P80455|RS12_DROME
	tr|M9PE30|M9PE30_DROME	tr|Q9VZI1|Q9VZI1_DROME
	tr|Q9VY87|Q9VY87_DROME
	sp|P17886|CRN_DROME
	tr|X2JEU3|X2JEU3_DROME	tr|Q9VZ00|Q9VZ00_DROME
	tr|X2JEX7|X2JEX7_DROME	sp|Q9VYQ8|UBP7_DROME
	tr|M9PFN1|M9PFN1_DROME	sp|Q9V3K3|RUVB2_DROME
	tr|Q9VK35|Q9VK35_DROME	tr|M9PD23|M9PD23_DROME
	tr|M9NFP7|M9NFP7_DROME	sp|P16914|ELAV_DROME	tr|E1NZB4|E1NZB4_DROME	tr|Q9VYI0|Q9VYI0_DROME
	tr|Q9VT60|Q9VT60_DROME	tr|Q7KUD4|Q7KUD4_DROME
	sp|Q9V431|API5_DROME
	tr|O76742|O76742_DROME
	tr|Q7K3D4|Q7K3D4_DROME
	tr|M9PDW8|M9PDW8_DROME	tr|M9PGT0|M9PGT0_DROME	tr|A8JV00|A8JV00_DROME	tr|X2JDY1|X2JDY1_DROME	tr|M9MSA5|M9MSA5_DROME	tr|X2JIN0|X2JIN0_DROME	tr|M9PJ82|M9PJ82_DROME	tr|E2QD99|E2QD99_DROME	tr|A8JUZ8|A8JUZ8_DROME	tr|M9PH82|M9PH82_DROME	tr|M9MS17|M9MS17_DROME	tr|A8JUZ9|A8JUZ9_DROME	tr|X2JEC4|X2JEC4_DROME	tr|M9PH75|M9PH75_DROME	tr|M9PJ79|M9PJ79_DROME	tr|M9PDW3|M9PDW3_DROME	tr|A8JV02|A8JV02_DROME
	tr|A0A0B4KGE6|A0A0B4KGE6_DROME	sp|P26270|PSMD7_DROME	tr|A0A0B4KFH4|A0A0B4KFH4_DROME
	sp|P11046|LAMB1_DROME
	tr|M9PGG4|M9PGG4_DROME	sp|P18824|ARM_DROME
	tr|Q9VXR5|Q9VXR5_DROME
	tr|M9PG22|M9PG22_DROME	sp|P61209|ARF1_DROME
	tr|M9PCU3|M9PCU3_DROME	tr|M9NEC1|M9NEC1_DROME	sp|P98081|DAB_DROME	tr|M9PFS5|M9PFS5_DROME	tr|E1JI13|E1JI13_DROME	tr|M9NDT7|M9NDT7_DROME	tr|M9NG14|M9NG14_DROME	tr|M9PI84|M9PI84_DROME
	tr|A8JR03|A8JR03_DROME	tr|A8JR02|A8JR02_DROME	tr|A0A0B4KGM4|A0A0B4KGM4_DROME	tr|A0A0B4KH30|A0A0B4KH30_DROME	tr|A8JR00|A8JR00_DROME	tr|A8JR01|A8JR01_DROME
	tr|O46231|O46231_DROME	tr|E1JJ21|E1JJ21_DROME	tr|Q9VA56|Q9VA56_DROME	tr|Q9VA58|Q9VA58_DROME	tr|C7LAH8|C7LAH8_DROME	tr|A0A0B4KHF2|A0A0B4KHF2_DROME	tr|Q9VA59|Q9VA59_DROME	tr|A0A0B4K7R6|A0A0B4K7R6_DROME	tr|A0A0B4KHW6|A0A0B4KHW6_DROME	tr|A8JRH3|A8JRH3_DROME	tr|A0A6H2EEH6|A0A6H2EEH6_DROME	tr|A0A0B4K6N4|A0A0B4K6N4_DROME
	tr|Q9VH76|Q9VH76_DROME
	sp|O61722|PRL1_DROME
	tr|Q24090|Q24090_DROME
	tr|A0A0B4LEV3|A0A0B4LEV3_DROME	sp|Q7JWR9|ZC3HF_DROME
	tr|Q9VM12|Q9VM12_DROME
	tr|M9NDM4|M9NDM4_DROME	sp|Q9V3J8|WDS_DROME
	tr|Q7JUS9|Q7JUS9_DROME
	tr|Q7KSU6|Q7KSU6_DROME	tr|Q9VHN7|Q9VHN7_DROME
	tr|M9PFG7|M9PFG7_DROME	tr|M9PF24|M9PF24_DROME	sp|P46824|KLC_DROME
	tr|A0A0B4KHZ1|A0A0B4KHZ1_DROME	sp|Q9VCI3|LSD1_DROME
	tr|M9PBS9|M9PBS9_DROME	tr|M9PHL4|M9PHL4_DROME	tr|M9PES8|M9PES8_DROME	tr|M9PEC1|M9PEC1_DROME	tr|Q9VRY6|Q9VRY6_DROME	tr|M9PEJ2|M9PEJ2_DROME
	sp|Q9VR59|VIP1_DROME	tr|X2JCY0|X2JCY0_DROME	tr|X2JGE9|X2JGE9_DROME	tr|X2JLN4|X2JLN4_DROME	tr|X2JG41|X2JG41_DROME	tr|X2JEN2|X2JEN2_DROME
	tr|Q8MKK5|Q8MKK5_DROME	tr|Q9W1G6|Q9W1G6_DROME	tr|Q9W1G5|Q9W1G5_DROME	tr|A0A0B4LHE0|A0A0B4LHE0_DROME	tr|Q8MLQ5|Q8MLQ5_DROME	tr|A0A0B4LGD3|A0A0B4LGD3_DROME
	tr|Q9VD52|Q9VD52_DROME
	tr|Q9VMI3|Q9VMI3_DROME
	tr|Q8INW2|Q8INW2_DROME	tr|B7YZX0|B7YZX0_DROME	tr|Q9VIU9|Q9VIU9_DROME
	tr|X2JKU5|X2JKU5_DROME	sp|Q24186|RS5A_DROME
	tr|Q9W1G7|Q9W1G7_DROME
	tr|D3DMM4|D3DMM4_DROME	tr|Q86B97|Q86B97_DROME	tr|Q9VGE9|Q9VGE9_DROME	tr|Q86B96|Q86B96_DROME	tr|Q86B95|Q86B95_DROME	tr|Q9VGF0|Q9VGF0_DROME	tr|Q86B94|Q86B94_DROME
	tr|Q9VRU0|Q9VRU0_DROME
	tr|Q7K4Y8|Q7K4Y8_DROME
	tr|Q9Y0Z1|Q9Y0Z1_DROME
	sp|Q9W1B0|GEK_DROME
	tr|Q8SXX1|Q8SXX1_DROME
	tr|Q76NQ9|Q76NQ9_DROME	tr|Q961Q7|Q961Q7_DROME	tr|Q9VY76|Q9VY76_DROME	tr|Q76NR0|Q76NR0_DROME	tr|D0IQK3|D0IQK3_DROME	tr|X2JFA0|X2JFA0_DROME	tr|M9MS55|M9MS55_DROME	tr|X2JEY5|X2JEY5_DROME
	tr|Q9VEP9|Q9VEP9_DROME
	tr|A1Z9L2|A1Z9L2_DROME	tr|A1Z9L0|A1Z9L0_DROME	tr|A0A0B4KFX4|A0A0B4KFX4_DROME	tr|Q8T076|Q8T076_DROME	tr|A0A0B4KEP1|A0A0B4KEP1_DROME	tr|A0A0B4LFC1|A0A0B4LFC1_DROME	tr|A0A0B4KFM5|A0A0B4KFM5_DROME	tr|A0A0B4KF25|A0A0B4KF25_DROME
	tr|A4V449|A4V449_DROME	sp|Q94511|NDUS1_DROME
	tr|M9NH51|M9NH51_DROME	tr|M9NDZ4|M9NDZ4_DROME	sp|Q24562|U2AF2_DROME	tr|M9NF89|M9NF89_DROME
	tr|Q8IR93|Q8IR93_DROME	tr|Q9VZ20|Q9VZ20_DROME
	tr|Q8IMQ8|Q8IMQ8_DROME	tr|Q9VBA0|Q9VBA0_DROME
	tr|Q6NP69|Q6NP69_DROME	tr|Q8INS9|Q8INS9_DROME
	tr|Q9VDK2|Q9VDK2_DROME
	tr|M9PGC4|M9PGC4_DROME	tr|M9PGV7|M9PGV7_DROME	tr|A4V3W2|A4V3W2_DROME	sp|P18431|SGG_DROME	tr|A4V3W1|A4V3W1_DROME	tr|Q0KHW6|Q0KHW6_DROME	tr|Q7KVY5|Q7KVY5_DROME	tr|C0PUX5|C0PUX5_DROME	tr|A8JUV9|A8JUV9_DROME
	tr|M9MRD9|M9MRD9_DROME	tr|X2JDJ3|X2JDJ3_DROME	tr|Q9VLS7|Q9VLS7_DROME
	tr|M9PJQ5|M9PJQ5_DROME	tr|M9NH88|M9NH88_DROME
	tr|A1ZBB4|A1ZBB4_DROME	tr|A8E6M1|A8E6M1_DROME	tr|E1JGL8|E1JGL8_DROME
	tr|Q9VZJ3|Q9VZJ3_DROME
	tr|Q9VQ94|Q9VQ94_DROME	tr|M9PC99|M9PC99_DROME
	tr|Q9NF31|Q9NF31_DROME	tr|Q9W523|Q9W523_DROME	tr|Q5U0W8|Q5U0W8_DROME	sp|P39769|PHP_DROME
	tr|Q9VQV7|Q9VQV7_DROME
	sp|P06604|TBA2_DROME
	sp|P26017|PC_DROME
	tr|A0A6F7U5U6|A0A6F7U5U6_DROME	tr|A0A0B4K6Y7|A0A0B4K6Y7_DROME	tr|Q8MQQ3|Q8MQQ3_DROME	tr|A0A0B4K6C7|A0A0B4K6C7_DROME	tr|Q8INQ0|Q8INQ0_DROME	tr|A8JQV7|A8JQV7_DROME	tr|Q9VHK4|Q9VHK4_DROME	tr|B7Z0U1|B7Z0U1_DROME	tr|A8JQV8|A8JQV8_DROME	tr|Q9VHK1|Q9VHK1_DROME	tr|Q9VHK3|Q9VHK3_DROME
	tr|Q94883|Q94883_DROME
	tr|Q9VB81|Q9VB81_DROME
	tr|Q9VC36|Q9VC36_DROME
	tr|A0A1W5Q009|A0A1W5Q009_DROME	tr|A0A1W5PXH3|A0A1W5PXH3_DROME
	tr|A0A0B4K686|A0A0B4K686_DROME	tr|A0A0B4K6C8|A0A0B4K6C8_DROME	tr|Q9VE20|Q9VE20_DROME	tr|A0A0B4K760|A0A0B4K760_DROME
	tr|A4V1B2|A4V1B2_DROME	sp|Q9NB04|PATJ_DROME
	tr|Q9XTL2|Q9XTL2_DROME
	tr|E1JIM1|E1JIM1_DROME	tr|A0A0B4K6Z4|A0A0B4K6Z4_DROME	tr|A0A0B4K6I8|A0A0B4K6I8_DROME	tr|Q0KI68|Q0KI68_DROME	tr|E1JIM0|E1JIM0_DROME	tr|A4V2Z1|A4V2Z1_DROME	tr|A0A0B4K690|A0A0B4K690_DROME	tr|A0A0B4K663|A0A0B4K663_DROME	tr|E2QD16|E2QD16_DROME
	tr|B5RIR1|B5RIR1_DROME	sp|Q24046|ATPB1_DROME
	sp|Q9NHV9|VAV_DROME	tr|M9PHJ6|M9PHJ6_DROME	tr|A8JUQ9|A8JUQ9_DROME
	tr|A0A0B4LH87|A0A0B4LH87_DROME	sp|Q9VFI9|PDE6_DROME	tr|A0A0B4KFZ3|A0A0B4KFZ3_DROME
	tr|Q9VSX2|Q9VSX2_DROME
	tr|Q95RL2|Q95RL2_DROME	tr|Q5U156|Q5U156_DROME	tr|A0A0B4KER0|A0A0B4KER0_DROME
	tr|A8JMD5|A8JMD5_DROME	tr|C6TP33|C6TP33_DROME	tr|A0A6M3Q8Y2|A0A6M3Q8Y2_DROME
	tr|Q8SXM8|Q8SXM8_DROME	tr|Q9W327|Q9W327_DROME
	sp|Q9VI10|SMD2_DROME
	tr|A0A0B4LHC3|A0A0B4LHC3_DROME	tr|A0A0B4LHN0|A0A0B4LHN0_DROME	tr|A0A0B4LHC1|A0A0B4LHC1_DROME	tr|B5RIZ2|B5RIZ2_DROME	sp|Q9VDS5|RG92B_DROME
	tr|A0A0B4K6M7|A0A0B4K6M7_DROME	sp|Q9VHA0|SCM_DROME
	tr|Q9VL89|Q9VL89_DROME
	tr|O62530|O62530_DROME
	tr|Q9W4Z0|Q9W4Z0_DROME	tr|Q7KVY9|Q7KVY9_DROME	tr|M9PGJ2|M9PGJ2_DROME	tr|E1JJB8|E1JJB8_DROME	tr|Q9W4Y9|Q9W4Y9_DROME	tr|M9PGV0|M9PGV0_DROME	tr|M9PGC1|M9PGC1_DROME
	tr|M9NE01|M9NE01_DROME	sp|Q27889|PP2B2_DROME
	tr|Q9V428|Q9V428_DROME
	tr|M9MRU9|M9MRU9_DROME	tr|M9PE38|M9PE38_DROME	tr|M9MRZ7|M9MRZ7_DROME	tr|A8JNI9|A8JNI9_DROME	tr|M9NFJ6|M9NFJ6_DROME	sp|P17970|KCNAB_DROME	tr|M9ND32|M9ND32_DROME	tr|Q0E8I8|Q0E8I8_DROME
	sp|Q9V3C0|DDX41_DROME
	sp|Q9VVH3|MIC13_DROME
	tr|A8JUY0|A8JUY0_DROME	sp|Q9W4D2|RNP4F_DROME
	tr|Q7K1W5|Q7K1W5_DROME
	tr|E1JIG1|E1JIG1_DROME	sp|P29503|NEUR_DROME
	tr|E1JJS2|E1JJS2_DROME	tr|M9NFH4|M9NFH4_DROME	tr|Q9VRA6|Q9VRA6_DROME	tr|X2JEI9|X2JEI9_DROME
	tr|A0A0B4LFB3|A0A0B4LFB3_DROME	sp|Q7JVI3|EIF3M_DROME
	sp|Q94901|LARK_DROME
	tr|Q9W2L6|Q9W2L6_DROME
	tr|M9PBZ9|M9PBZ9_DROME	sp|P48598|IF4E_DROME
	tr|X2JB25|X2JB25_DROME	sp|P02844|VIT2_DROME
	tr|M9NGK2|M9NGK2_DROME	tr|E1JJQ5|E1JJQ5_DROME	tr|M9PJQ4|M9PJQ4_DROME	tr|M9PHG6|M9PHG6_DROME	tr|A0A0S0X7Z4|A0A0S0X7Z4_DROME	sp|P08510|KCNAS_DROME
	tr|M9NFR5|M9NFR5_DROME	tr|Q95RE4|Q95RE4_DROME
	tr|E1JHV7|E1JHV7_DROME	tr|M9PBG5|M9PBG5_DROME	tr|M9PE12|M9PE12_DROME	tr|E1JHV6|E1JHV6_DROME	sp|Q9W0T1|NU301_DROME	tr|M9PDH1|M9PDH1_DROME
	tr|A1Z6M0|A1Z6M0_DROME
	sp|P98149|DIF_DROME	tr|E1JHK1|E1JHK1_DROME	tr|E1JHK2|E1JHK2_DROME
	sp|P35220|CTNA_DROME	tr|X2JBG9|X2JBG9_DROME
	sp|Q9VKD3|NFS1_DROME
	tr|Q8MRG6|Q8MRG6_DROME	tr|Q9VW52|Q9VW52_DROME
	sp|Q24179|SLY1_DROME
	tr|Q9VPN5|Q9VPN5_DROME
	tr|Q9VH81|Q9VH81_DROME
	tr|E1JHD6|E1JHD6_DROME	sp|P92208|JNK_DROME	sp|O61443|MK38B_DROME	tr|E1JIV6|E1JIV6_DROME	sp|O62618|MK38A_DROME
	tr|Q7JX87|Q7JX87_DROME	tr|A1Z893|A1Z893_DROME	tr|A1Z892|A1Z892_DROME
	sp|Q8SX68|CT2NL_DROME
	tr|Q7K304|Q7K304_DROME	tr|A0A0B4KFF6|A0A0B4KFF6_DROME	tr|A8DY77|A8DY77_DROME
	tr|Q7KUX3|Q7KUX3_DROME	tr|Q0KHR7|Q0KHR7_DROME
	tr|M9MRX4|M9MRX4_DROME	tr|M9MRX1|M9MRX1_DROME	tr|M9MS19|M9MS19_DROME	tr|X2JCM1|X2JCM1_DROME	tr|M9MRS5|M9MRS5_DROME	tr|M9PEN3|M9PEN3_DROME	tr|M9MSK6|M9MSK6_DROME	tr|A8JNM5|A8JNM5_DROME	tr|X2JC49|X2JC49_DROME	tr|M9MRR4|M9MRR4_DROME	tr|A8JNM6|A8JNM6_DROME	tr|A8JNM7|A8JNM7_DROME	tr|Q7KU92|Q7KU92_DROME	tr|X2JGD3|X2JGD3_DROME	tr|A8JNM4|A8JNM4_DROME	tr|Q7KU95|Q7KU95_DROME
	tr|Q7KN85|Q7KN85_DROME	tr|E2QCF1|E2QCF1_DROME	tr|A0A0B4LFH8|A0A0B4LFH8_DROME
	sp|Q24210|CSKP_DROME	tr|E1JIS7|E1JIS7_DROME	tr|A0A0B4KH39|A0A0B4KH39_DROME	tr|A0A6H2EEU7|A0A6H2EEU7_DROME
	tr|M9PF36|M9PF36_DROME	tr|M9PEX2|M9PEX2_DROME	tr|Q9VSZ1|Q9VSZ1_DROME
	tr|E2QD73|E2QD73_DROME	sp|P12252|PDE4B_DROME	tr|M9PDN2|M9PDN2_DROME	sp|Q8IRU4|PDE4E_DROME	sp|Q9W4S9|PDE4C_DROME
	tr|M9PEV2|M9PEV2_DROME	tr|Q9VSS9|Q9VSS9_DROME
	tr|Q9VEV3|Q9VEV3_DROME
	tr|E5DK16|E5DK16_DROME	tr|A0A0B4JD00|A0A0B4JD00_DROME	tr|A8DY69|A8DY69_DROME	tr|A0A0B4JCS1|A0A0B4JCS1_DROME	tr|A0A0B4JCQ5|A0A0B4JCQ5_DROME	tr|Q8SXP0|Q8SXP0_DROME	tr|A0A0B4JD31|A0A0B4JD31_DROME	tr|I0E2I4|I0E2I4_DROME	tr|A0A0B4JD27|A0A0B4JD27_DROME
	tr|Q9VA36|Q9VA36_DROME	tr|A0A0B4KI34|A0A0B4KI34_DROME	tr|A0A0B4KI32|A0A0B4KI32_DROME	tr|Q86PF3|Q86PF3_DROME	tr|A0A0B4KHJ8|A0A0B4KHJ8_DROME	tr|A0A0B4KHG1|A0A0B4KHG1_DROME	tr|Q9Y154|Q9Y154_DROME	tr|Q9VA35|Q9VA35_DROME
	tr|A0A0B4K6A1|A0A0B4K6A1_DROME	tr|Q59E07|Q59E07_DROME	tr|E1JJ55|E1JJ55_DROME	tr|Q95T61|Q95T61_DROME	tr|Q9VNH7|Q9VNH7_DROME	tr|Q9Y164|Q9Y164_DROME	tr|E1JJ59|E1JJ59_DROME	tr|Q8IPR0|Q8IPR0_DROME	tr|E1JJ60|E1JJ60_DROME
	tr|A8DYJ3|A8DYJ3_DROME	sp|Q11002|CANA_DROME	tr|A0A0B4LG26|A0A0B4LG26_DROME	tr|M9NE73|M9NE73_DROME	sp|Q9VT65|CANB_DROME
	tr|B5RIU6|B5RIU6_DROME	sp|Q8T390|SH3G3_DROME
	sp|P06002|OPS1_DROME
	sp|P36188|TNNI_DROME	tr|E4NKJ3|E4NKJ3_DROME	tr|A4V4Q6|A4V4Q6_DROME
	tr|Q7K7G0|Q7K7G0_DROME	tr|Q9W555|Q9W555_DROME
	tr|M9PDS8|M9PDS8_DROME	tr|M9PBI9|M9PBI9_DROME	tr|M9PEA5|M9PEA5_DROME	tr|M9PDZ9|M9PDZ9_DROME	tr|M9PDS3|M9PDS3_DROME	tr|M9PBJ0|M9PBJ0_DROME	tr|M9PGY4|M9PGY4_DROME	tr|M9PDZ6|M9PDZ6_DROME	tr|M9PEA0|M9PEA0_DROME	tr|M9NDX0|M9NDX0_DROME	sp|Q9I7U4|TITIN_DROME	tr|M9PEA9|M9PEA9_DROME	tr|M9PGZ0|M9PGZ0_DROME
	tr|A0A0B4LHS1|A0A0B4LHS1_DROME	sp|P06742|MLC1_DROME
	sp|Q9U4G1|BDL_DROME
	tr|M9PFK6|M9PFK6_DROME	sp|Q04691|FBP1_DROME
	tr|Q76NQ0|Q76NQ0_DROME
	tr|Q8SZM2|Q8SZM2_DROME
	sp|Q9GU68|IF5A_DROME
	tr|Q9V455|Q9V455_DROME
	tr|Q9VBI2|Q9VBI2_DROME
	tr|A0A6H2EGC1|A0A6H2EGC1_DROME	tr|Q9VEX2|Q9VEX2_DROME	tr|Q8INB6|Q8INB6_DROME	tr|A0A6H2EFT7|A0A6H2EFT7_DROME	tr|Q59DW8|Q59DW8_DROME	tr|Q86BR9|Q86BR9_DROME	tr|Q86NK8|Q86NK8_DROME	tr|Q4AB31|Q4AB31_DROME	tr|A0A0B4K7C4|A0A0B4K7C4_DROME	tr|A0A0B4K697|A0A0B4K697_DROME	tr|A0A0B4KHL4|A0A0B4KHL4_DROME	tr|A0A6H2EFD0|A0A6H2EFD0_DROME	tr|Q8IHB0|Q8IHB0_DROME
	tr|A8DYL2|A8DYL2_DROME
	tr|Q7K2W6|Q7K2W6_DROME
	tr|M9PG47|M9PG47_DROME	sp|P13008|RS26_DROME
	tr|Q8IPG9|Q8IPG9_DROME	tr|M9PCW5|M9PCW5_DROME	tr|Q7KTJ7|Q7KTJ7_DROME
	sp|Q9VZU4|NDUS3_DROME
	sp|Q24208|IF2G_DROME	tr|A0A0B4KGP8|A0A0B4KGP8_DROME
	sp|P41093|RL18A_DROME
	tr|A1ZA73|A1ZA73_DROME
	tr|M9MQH9|M9MQH9_DROME	sp|P36179|2AAA_DROME	tr|M9NDI6|M9NDI6_DROME	tr|H5V8B8|H5V8B8_DROME
	tr|Q9I7I8|Q9I7I8_DROME	tr|A0A0B4JDD8|A0A0B4JDD8_DROME	tr|A0A0B4JDG2|A0A0B4JDG2_DROME	tr|B7Z0M9|B7Z0M9_DROME	tr|Q7KSB3|Q7KSB3_DROME	tr|A0A0B4JCZ0|A0A0B4JCZ0_DROME	tr|Q8IN56|Q8IN56_DROME	tr|Q8IN55|Q8IN55_DROME
	tr|A0A0B4LFD2|A0A0B4LFD2_DROME	sp|P29845|HSP7E_DROME
	sp|Q7KVQ0|GAR1_DROME
	sp|P13496|DCTN1_DROME
	tr|O77062|O77062_DROME	tr|A0A6H2EIE0|A0A6H2EIE0_DROME	tr|A0A6H2EJK0|A0A6H2EJK0_DROME
	tr|X2J6N7|X2J6N7_DROME	tr|Q8INX7|Q8INX7_DROME	sp|P15278|FAS3_DROME	tr|X2JAT7|X2JAT7_DROME	tr|A8DZ14|A8DZ14_DROME
	tr|E1JJF9|E1JJF9_DROME	tr|E1JJF8|E1JJF8_DROME	sp|P20241|NRG_DROME	tr|M9NEZ5|M9NEZ5_DROME
	tr|Q9VJ74|Q9VJ74_DROME
	tr|Q9VUC1|Q9VUC1_DROME	tr|M9MSL3|M9MSL3_DROME
	sp|Q9W1V3|FBRL_DROME
	tr|M9PBM1|M9PBM1_DROME	sp|Q94535|U2AF1_DROME
	sp|Q9VE00|C12A4_DROME	sp|Q9VE01|C12A5_DROME
	sp|P21914|SDHB_DROME
	tr|M9MRT6|M9MRT6_DROME	sp|P08645|RAP1_DROME
	tr|M9NE07|M9NE07_DROME	sp|Q9VXB0|NECAP_DROME
	tr|Q9VVH5|Q9VVH5_DROME
	tr|Q7KMQ0|Q7KMQ0_DROME
	tr|Q9V4E0|Q9V4E0_DROME
	sp|Q94516|AT5F1_DROME
	tr|Q9I7R0|Q9I7R0_DROME	tr|C0PDF4|C0PDF4_DROME	tr|M9PEW1|M9PEW1_DROME
	tr|M9PB84|M9PB84_DROME	sp|P31009|RS2_DROME
	tr|Q0E8E8|Q0E8E8_DROME
	tr|Q9VSK4|Q9VSK4_DROME
	sp|P48148|RHO1_DROME
	sp|P17210|KINH_DROME
	tr|Q7K5N8|Q7K5N8_DROME	tr|A1ZAU4|A1ZAU4_DROME
	sp|Q9V3G1|RL8_DROME
	tr|Q9VHT5|Q9VHT5_DROME
	tr|B4F5U4|B4F5U4_DROME	sp|Q9VYY2|SPCS2_DROME
	tr|A4V303|A4V303_DROME	sp|P48605|TCPG_DROME
	tr|A0A0B4KEY5|A0A0B4KEY5_DROME	sp|P82147|L2EFL_DROME
	tr|Q95TZ7|Q95TZ7_DROME	tr|Q8IQB4|Q8IQB4_DROME	tr|E1JI76|E1JI76_DROME	tr|Q058U1|Q058U1_DROME	tr|E1JI73|E1JI73_DROME	tr|Q7KUB5|Q7KUB5_DROME
	tr|Q9VDC6|Q9VDC6_DROME
	tr|Q9VJ12|Q9VJ12_DROME
	tr|Q9VZF9|Q9VZF9_DROME
	tr|Q9VT00|Q9VT00_DROME
	sp|Q9VYG2|BAP60_DROME
	tr|A0A0B4LGM0|A0A0B4LGM0_DROME	tr|B7YZQ3|B7YZQ3_DROME	tr|Q8MLN9|Q8MLN9_DROME	tr|A0AVW1|A0AVW1_DROME
	sp|Q9V3S0|CP4G1_DROME
	tr|Q7KLX3|Q7KLX3_DROME
	tr|Q9W0C3|Q9W0C3_DROME
	tr|Q9VEK8|Q9VEK8_DROME
	tr|A0A0B4LHV0|A0A0B4LHV0_DROME	tr|A0A0B4LHR7|A0A0B4LHR7_DROME	tr|A0A0B4KI45|A0A0B4KI45_DROME	tr|A0A6H2EDU2|A0A6H2EDU2_DROME	tr|A0A0B4KHQ8|A0A0B4KHQ8_DROME	tr|A0A0B4LHS3|A0A0B4LHS3_DROME	tr|Q9VB13|Q9VB13_DROME	tr|A0A0B4LIT4|A0A0B4LIT4_DROME	tr|A0A126GV16|A0A126GV16_DROME	tr|A0A0B4LIS6|A0A0B4LIS6_DROME	tr|Q9VB15|Q9VB15_DROME
	tr|A0A0B4KFI7|A0A0B4KFI7_DROME	sp|P52034|PFKA_DROME	tr|A0A0B4K7L1|A0A0B4K7L1_DROME
	tr|Q9VEA7|Q9VEA7_DROME
	tr|Q7JR58|Q7JR58_DROME
	tr|Q9VT23|Q9VT23_DROME
	tr|Q2PDR9|Q2PDR9_DROME	tr|M9PDB2|M9PDB2_DROME	tr|Q9VIJ4|Q9VIJ4_DROME	tr|Q7KT16|Q7KT16_DROME
	tr|Q9VGA3|Q9VGA3_DROME
	tr|Q9VI66|Q9VI66_DROME
	tr|X2J8Y6|X2J8Y6_DROME	sp|Q9V3R1|A36DE_DROME
	sp|Q9VWI0|NDUS4_DROME
	tr|Q9VJZ1|Q9VJZ1_DROME
	tr|M9PIG8|M9PIG8_DROME	sp|P55035|PSMD4_DROME
	tr|A0A6M3QH40|A0A6M3QH40_DROME	tr|Q7K1M7|Q7K1M7_DROME	tr|A0A6M3Q831|A0A6M3Q831_DROME	tr|A0A6M3Q762|A0A6M3Q762_DROME	tr|A0A0B4K7L3|A0A0B4K7L3_DROME	tr|A0A0B4K6W0|A0A0B4K6W0_DROME	tr|B7YZD8|B7YZD8_DROME	tr|A0A0B4KEH7|A0A0B4KEH7_DROME	tr|A1Z867|A1Z867_DROME	tr|B7YZD9|B7YZD9_DROME	tr|Q966V0|Q966V0_DROME	tr|A1Z871|A1Z871_DROME	tr|A0A6M3Q7N5|A0A6M3Q7N5_DROME	tr|A0A0B4KEJ6|A0A0B4KEJ6_DROME	tr|A0A6M3Q951|A0A6M3Q951_DROME	tr|Q7JR75|Q7JR75_DROME	tr|A1Z869|A1Z869_DROME	tr|A0A0B4K7W2|A0A0B4K7W2_DROME	tr|A1Z866|A1Z866_DROME	tr|Q86P80|Q86P80_DROME	tr|A1Z870|A1Z870_DROME	tr|D3DMM3|D3DMM3_DROME	tr|A1Z872|A1Z872_DROME	tr|Q966U7|Q966U7_DROME
	tr|E6PBV6|E6PBV6_DROME	sp|Q8SWU7|OLA1_DROME	tr|A0A4D6K4F6|A0A4D6K4F6_DROME
	sp|Q9VN50|EI3F1_DROME
	tr|Q9VW54|Q9VW54_DROME
	tr|Q9V3H9|Q9V3H9_DROME
	tr|Q9VHL2|Q9VHL2_DROME
	sp|Q08012|GRAP_DROME
	tr|Q9VEY5|Q9VEY5_DROME
	tr|Q8MKJ6|Q8MKJ6_DROME
	tr|A0A0B4KHG5|A0A0B4KHG5_DROME	tr|A0A0B4KI35|A0A0B4KI35_DROME	tr|A0A0B4KHK5|A0A0B4KHK5_DROME	sp|P12024|CHAO_DROME	tr|A0A0B4KHX5|A0A0B4KHX5_DROME
	tr|A0A0B4JD48|A0A0B4JD48_DROME	sp|Q95029|CATL_DROME
	tr|Q9VQB4|Q9VQB4_DROME
	tr|M9PG76|M9PG76_DROME	sp|P19889|RLA0_DROME
	tr|Q9VQD7|Q9VQD7_DROME
	tr|M9PG55|M9PG55_DROME	tr|Q9VJ42|Q9VJ42_DROME	tr|B7YZX6|B7YZX6_DROME
	tr|A0A0B4LJ12|A0A0B4LJ12_DROME	sp|P08879|NDKA_DROME	tr|A0A0B4LHX6|A0A0B4LHX6_DROME
	tr|Q9VZE4|Q9VZE4_DROME
	tr|A0A0C4DHG6|A0A0C4DHG6_DROME	tr|A0A0C4DHG2|A0A0C4DHG2_DROME	sp|Q07171|GELS_DROME
	tr|Q7K3N4|Q7K3N4_DROME
	tr|Q9W0E4|Q9W0E4_DROME	tr|Q8IRH0|Q8IRH0_DROME	tr|Q8IRH1|Q8IRH1_DROME
	tr|Q9VGZ3|Q9VGZ3_DROME
	tr|Q9VJ86|Q9VJ86_DROME
	tr|Q9VD29|Q9VD29_DROME
	tr|A0A0B4KF46|A0A0B4KF46_DROME	tr|Q8T0L3|Q8T0L3_DROME
	sp|Q9VSL3|SEPIA_DROME
	tr|O18333|O18333_DROME
	tr|Q9Y162|Q9Y162_DROME
	tr|Q9VTV3|Q9VTV3_DROME	tr|Q8IQG9|Q8IQG9_DROME
	tr|A0A0B4K623|A0A0B4K623_DROME	sp|O96553|C1TC_DROME
	tr|Q9VK69|Q9VK69_DROME
	tr|Q9VPU7|Q9VPU7_DROME	tr|Q8IPW1|Q8IPW1_DROME
	sp|Q9VWG3|RS10B_DROME	tr|M9NEQ9|M9NEQ9_DROME	sp|Q9VB14|RS10A_DROME
	tr|Q9VAY2|Q9VAY2_DROME
	tr|Q9VJL9|Q9VJL9_DROME
	tr|Q95U34|Q95U34_DROME
	tr|Q9VDV2|Q9VDV2_DROME
	sp|P55841|RL14_DROME
	tr|Q9VT61|Q9VT61_DROME
	sp|Q9W2D9|EIF3K_DROME
	tr|A0A126GUS7|A0A126GUS7_DROME	tr|A0A0B4K618|A0A0B4K618_DROME	tr|A0A0B4KGP6|A0A0B4KGP6_DROME	tr|A0A0B4KFN9|A0A0B4KFN9_DROME	tr|B3LF78|B3LF78_DROME	sp|Q9NFU0|FMR1_DROME
	tr|Q8IQZ1|Q8IQZ1_DROME	tr|Q86B44|Q86B44_DROME	tr|X2JCE7|X2JCE7_DROME	tr|Q9VX03|Q9VX03_DROME	tr|Q1RL06|Q1RL06_DROME
	tr|Q9W2M4|Q9W2M4_DROME
	sp|Q7KUT2|LONM_DROME
	tr|Q95T29|Q95T29_DROME	tr|Q7JPS2|Q7JPS2_DROME
	tr|Q9VKX2|Q9VKX2_DROME
	tr|A4V391|A4V391_DROME	sp|P12613|TCPA_DROME
	tr|E1JGZ9|E1JGZ9_DROME	sp|Q9XZJ4|PSA6_DROME
	tr|Q8IP51|Q8IP51_DROME	tr|M9MRU0|M9MRU0_DROME	tr|R9PY40|R9PY40_DROME
	tr|A0A0C4DHG9|A0A0C4DHG9_DROME	tr|Q86B73|Q86B73_DROME	tr|B7Z0R6|B7Z0R6_DROME	tr|Q0KI03|Q0KI03_DROME	tr|A4V3J9|A4V3J9_DROME	tr|A8JRF7|A8JRF7_DROME	sp|P49762|DOA_DROME	tr|A0A0B4K6R9|A0A0B4K6R9_DROME	tr|A0A0B4K7Z3|A0A0B4K7Z3_DROME	tr|Q8IML9|Q8IML9_DROME	tr|Q86B72|Q86B72_DROME
	tr|A0A0B4KHU1|A0A0B4KHU1_DROME	sp|Q9VDG2|RLIP_DROME
	sp|P35416|MYSP2_DROME	tr|A4V1N9|A4V1N9_DROME
	tr|Q9VK60|Q9VK60_DROME
	tr|A4V441|A4V441_DROME	sp|Q24524|SING_DROME
	tr|Q9VAX8|Q9VAX8_DROME
	tr|M9ND19|M9ND19_DROME	sp|Q9W0P5|GALE_DROME
	tr|Q9W2J5|Q9W2J5_DROME	tr|A0A0B4LH29|A0A0B4LH29_DROME
	tr|M9PET0|M9PET0_DROME	tr|M9PC43|M9PC43_DROME	tr|B5RIM9|B5RIM9_DROME	sp|P13706|GPDA_DROME
	sp|Q7YU24|MARF_DROME
	tr|Q9I7J0|Q9I7J0_DROME
	tr|Q7KMP8|Q7KMP8_DROME
	tr|Q95RB1|Q95RB1_DROME
	tr|Q59DP4|Q59DP4_DROME	tr|Q59DP3|Q59DP3_DROME	tr|H9XVQ0|H9XVQ0_DROME
	tr|Q7KTA9|Q7KTA9_DROME
	tr|X2JJD6|X2JJD6_DROME	sp|Q9VZ49|ENDOU_DROME
	tr|Q9VQR2|Q9VQR2_DROME
	tr|Q9VJ28|Q9VJ28_DROME
	tr|A0A0B4LGC6|A0A0B4LGC6_DROME	tr|Q8MLS7|Q8MLS7_DROME	tr|A0A0B4LG95|A0A0B4LG95_DROME	tr|Q7K274|Q7K274_DROME
	tr|Q9VXI1|Q9VXI1_DROME
	tr|Q8IQQ9|Q8IQQ9_DROME	tr|Q8T4G5|Q8T4G5_DROME
	tr|Q7JVZ8|Q7JVZ8_DROME
	tr|A8JNR2|A8JNR2_DROME	tr|A8JNR3|A8JNR3_DROME	tr|X2JCT5|X2JCT5_DROME	tr|Q8IQE6|Q8IQE6_DROME
	tr|Q9VXC9|Q9VXC9_DROME
	tr|M9PH99|M9PH99_DROME	sp|P20228|DCE_DROME
	tr|Q9VY91|Q9VY91_DROME
	tr|Q8IN49|Q8IN49_DROME
	tr|Q9VF66|Q9VF66_DROME	tr|A0A0B4KGQ6|A0A0B4KGQ6_DROME	tr|A0A126GUV2|A0A126GUV2_DROME	tr|E1JIL7|E1JIL7_DROME	tr|A0A0B4JCX2|A0A0B4JCX2_DROME	tr|A0A0B4JDC9|A0A0B4JDC9_DROME	tr|Q86BS0|Q86BS0_DROME	tr|A0A0B4KG12|A0A0B4KG12_DROME	tr|Q86BP0|Q86BP0_DROME
	sp|P31007|DLG1_DROME	tr|M9PJI4|M9PJI4_DROME	tr|E1JJH6|E1JJH6_DROME	tr|M9NGZ2|M9NGZ2_DROME	tr|E8NH13|E8NH13_DROME	tr|E1JJH5|E1JJH5_DROME
	sp|Q7K0D8|NUP50_DROME
	tr|E2QCY9|E2QCY9_DROME	sp|Q24546|SYN_DROME	tr|E2QCZ0|E2QCZ0_DROME
	tr|Q8IQ62|Q8IQ62_DROME	tr|A0A0S0WGZ0|A0A0S0WGZ0_DROME	tr|M9PHI5|M9PHI5_DROME	tr|A8JNL6|A8JNL6_DROME	sp|P91621|SIF1_DROME	tr|A8JNL4|A8JNL4_DROME	tr|M9PE98|M9PE98_DROME	tr|X2JC30|X2JC30_DROME	tr|X2JCJ4|X2JCJ4_DROME	tr|M9PBR2|M9PBR2_DROME
	tr|M9NGG5|M9NGG5_DROME	sp|Q9W596|FUTSC_DROME
	sp|P13395|SPTCA_DROME	tr|M9PDQ0|M9PDQ0_DROME	tr|M9PBI5|M9PBI5_DROME	tr|M9PGV6|M9PGV6_DROME
	tr|A0A0B4LH71|A0A0B4LH71_DROME	tr|A0A4D6K1Y5|A0A4D6K1Y5_DROME	tr|A0A4D6K595|A0A4D6K595_DROME	sp|Q960T2|SAP47_DROME	tr|F3YDF6|F3YDF6_DROME
	tr|Q9VQE0|Q9VQE0_DROME
	sp|P54359|SEPT2_DROME	tr|A0A0B4KGJ1|A0A0B4KGJ1_DROME
	tr|Q7JS69|Q7JS69_DROME	tr|M9PDX8|M9PDX8_DROME
	sp|O61613|NMT_DROME
	sp|P40797|PNUT_DROME
	tr|M9PF16|M9PF16_DROME	sp|Q00963|SPTCB_DROME	tr|M9PHG4|M9PHG4_DROME
	tr|A4V134|A4V134_DROME	tr|D1YSG7|D1YSG7_DROME	sp|Q00168|KCC2A_DROME	tr|D1YSG8|D1YSG8_DROME	tr|A4V133|A4V133_DROME	tr|L0MNA2|L0MNA2_DROME	tr|L0MLP2|L0MLP2_DROME	tr|L0MLR4|L0MLR4_DROME
	tr|Q9V3N7|Q9V3N7_DROME	tr|Q8IPQ2|Q8IPQ2_DROME
	tr|M9NEL1|M9NEL1_DROME	sp|Q9VXF1|PP2B3_DROME
	tr|Q7KVX5|Q7KVX5_DROME	tr|Q9W4N8|Q9W4N8_DROME
	tr|E1JIR4|E1JIR4_DROME	tr|A0A0B4KGG8|A0A0B4KGG8_DROME	sp|P13607|ATNA_DROME
	tr|Q7KN75|Q7KN75_DROME
	sp|P91926|AP2A_DROME
	tr|B7Z0L1|B7Z0L1_DROME	tr|Q9VES3|Q9VES3_DROME	sp|P10674|FAS1_DROME	tr|Q8INA9|Q8INA9_DROME	tr|A8JR25|A8JR25_DROME	tr|B7Z0L0|B7Z0L0_DROME	tr|A0A0B4KH94|A0A0B4KH94_DROME
	sp|P21187|PABP_DROME
	tr|E1JJA4|E1JJA4_DROME	tr|E1JJA5|E1JJA5_DROME	tr|A4V4I8|A4V4I8_DROME	sp|P27619|DYN_DROME	tr|X2JE15|X2JE15_DROME	tr|M9PHQ0|M9PHQ0_DROME	tr|A4V4J0|A4V4J0_DROME	tr|M9PJN9|M9PJN9_DROME
	tr|Q7K3J0|Q7K3J0_DROME
	tr|Q9VGQ1|Q9VGQ1_DROME
	tr|Q9VFV9|Q9VFV9_DROME
	tr|A0A6M3Q7Q7|A0A6M3Q7Q7_DROME	tr|A0A0B4K849|A0A0B4K849_DROME	tr|A0A0B4K7A5|A0A0B4K7A5_DROME	sp|Q02645|HTS_DROME	tr|A8DYJ2|A8DYJ2_DROME
	sp|P11147|HSP7D_DROME	tr|C7LA75|C7LA75_DROME
	tr|E1JIJ5|E1JIJ5_DROME	sp|P31409|VATB_DROME
	tr|A8JQV2|A8JQV2_DROME	tr|Q86PA0|Q86PA0_DROME	tr|A0A0B4KFF3|A0A0B4KFF3_DROME
	sp|P12370|KAPC1_DROME
	tr|M9NE89|M9NE89_DROME	sp|P08928|LAM0_DROME
	tr|A0A0B4KHS9|A0A0B4KHS9_DROME	sp|P48461|PP11_DROME
	tr|Q9VRP3|Q9VRP3_DROME
	tr|Q8IP94|Q8IP94_DROME	tr|Q9VKB0|Q9VKB0_DROME
	tr|Q9VXQ5|Q9VXQ5_DROME
	sp|O61491|FLOT1_DROME
