# Supplementary material for: Tissue-specific O-GlcNAcylation profiling identifies substrates in translational machinery in Drosophila mushroom body contributing to olfactory learning
Source: eLife. 2024 Apr 15;13:e91269. doi: 10.7554/eLife.91269 (PMC11018347; doi:10.7554/eLife.91269)
Supplement: Supplementary file 5. [file elife-91269-supp5.xlsx]

## Sheet: Sheet1
O-GlcNAcylated proteins identified by TurboID-CpOGA CD from mushroom body of Drosophila.
NO.	Majority protein IDs	UniProtKB	Gene Symbol	FlyBase ID	Annotation Symbol	Peptides	Razor + unique peptides	Unique peptides	Log2( LFQ intensity+1)
									MB TurboID-CpOGA CD				MB TurboID-CpOGA DM				Log2 Fold Change	P Value
									1	2	3	Average	1	2	3	Average
3	tr|Q9VHC7|Q9VHC7_DROME	Q9VHC7	rump	FBgn0267790	CG9373	5	5	5	25.9298	25.3039	24.2909	25.1749	0	0	0	0	25.1749	7.74534e-07
4	tr|M9NGG5|M9NGG5_DROME	M9NGG5	futsch	FBgn0259108	CG34387	15	15	15	24.8434	25.0929	25.3512	25.0959	0	0	0	0	25.0959	6.98661e-09
5	sp|Q9W4V8|TI50C_DROME	Q9W4V8	ttm50	FBgn0250874	CG2713	6	6	6	25.1151	25.5167	24.313	24.9816	0	0	0	0	24.9816	2.41172e-07
6	tr|A0A0B4LIJ0|A0A0B4LIJ0_DROME	A0A0B4LIJ0	Rpt2	FBgn0015282	CG5289	6	6	6	25.1365	25.1469	24.2552	24.8462	0	0	0	0	24.8462	1.19939e-07
7	tr|Q9VKM3|Q9VKM3_DROME	Q9VKM3	ATPsynG	FBgn0010612	CG6105	2	2	2	24.2593	24.9034	25.2097	24.7908	0	0	0	0	24.7908	9.76815e-08
8	tr|E1JGN9|E1JGN9_DROME	E1JGN9	exu	FBgn0000615	CG8994	6	6	6	25.4448	24.6338	24.1518	24.7435	0	0	0	0	24.7435	3.23766e-07
9	sp|Q9VHR8|DPP3_DROME	Q9VHR8	DppIII	FBgn0037580	CG7415	8	8	8	24.4144	25.0667	24.2873	24.5895	0	0	0	0	24.5895	5.57131e-08
10	sp|P35128|UBE2N_DROME	P35128	ben	FBgn0000173	CG18319	4	4	4	24.3742	24.5264	24.1939	24.3648	0	0	0	0	24.3648	1.45162e-09
11	tr|Q9VKX2|Q9VKX2_DROME	Q9VKX2	Mdh1	FBgn0262782	CG5362	4	4	4	24.129	24.5669	24.2562	24.3174	0	0	0	0	24.3174	4.91032e-09
12	tr|A0A0B4K623|A0A0B4K623_DROME	A0A0B4K623	pug	FBgn0020385	CG4067	9	9	9	24.6956	24.5099	23.4078	24.2044	0	0	0	0	24.2044	4.5522e-07
13	sp|Q7KRY7|SCRIB_DROME	Q7KRY7	scrib	FBgn0263289	CG43398	4	4	4	23.786	24.0483	24.201	24.0118	0	0	0	0	24.0118	3.89493e-09
14	sp|P45437|COPB_DROME	P45437	betaCOP	FBgn0008635	CG6223	4	4	4	24.3061	24.4348	23.1748	23.9719	0	0	0	0	23.9719	4.6553e-07
15	tr|Q9I7T5|Q9I7T5_DROME	Q9I7T5	mge	FBgn0035473	CG14981	4	4	4	24.3016	22.6918	24.4384	23.8106	0	0	0	0	23.8106	1.83936e-06
16	tr|A4UZR3|A4UZR3_DROME	A4UZR3	Treh	FBgn0003748	CG9364	7	7	7	22.5997	23.2571	23.993	23.2833	0	0	0	0	23.2833	5.34394e-07
17	sp|P11997|LSP1G_DROME	P11997	Lsp1gamma	FBgn0002564	CG6821	34	34	32	31.5492	30.9781	25.7631	29.4301	23.6393	0	0	7.87977	21.5503	0.0562037
18	sp|Q9VZE6|BRX1_DROME	Q9VZE6	CG11583	FBgn0035524	CG11583	19	19	19	29.9509	30.0074	0	19.9861	0	0	0	0	19.9861	0.116117
19	sp|Q8T6B9|PUF68_DROME	Q8T6B9	hfp	FBgn0028577	CG12085	14	14	14	29.2737	29.536	0	19.6032	0	0	0	0	19.6032	0.116124
20	sp|Q9V9Z9|EBP2_DROME	Q9V9Z9	CG1542	FBgn0039828	CG1542	9	9	9	28.732	28.7533	0	19.1618	0	0	0	0	19.1618	0.116117
21	tr|Q9VL71|Q9VL71_DROME	Q9VL71	Srp54	FBgn0024285	CG4602	10	10	10	28.293	28.9031	0	19.0654	0	0	0	0	19.0654	0.116162
22	tr|O76994|O76994_DROME	O76994	Ip259	FBgn0025366	CG5277	6	6	6	28.0385	28.5387	0	18.8591	0	0	0	0	18.8591	0.116148
23	sp|P11995|LSP1A_DROME	P11995	Lsp1alpha	FBgn0002562	CG2559	24	23	19	27.9507	27.887	0	18.6125	0	0	0	0	18.6125	0.116117
24	tr|Q9W1H3|Q9W1H3_DROME	Q9W1H3	Upf3	FBgn0034923	CG11184	13	13	13	27.8497	27.9816	0	18.6104	0	0	0	0	18.6104	0.116119
25	sp|Q9VFE6|RRP15_DROME	Q9VFE6	CG3817	FBgn0038275	CG3817	8	8	8	27.6406	28.0319	0	18.5575	0	0	0	0	18.5575	0.116136
26	sp|Q9VDS6|SURF6_DROME	Q9VDS6	Surf6	FBgn0038746	CG4510	7	7	7	28.159	27.2996	0	18.4862	0	0	0	0	18.4862	0.116212
27	tr|Q9VXR5|Q9VXR5_DROME	Q9VXR5	Dmel\CG9281	FBgn0030672	CG9281	14	14	14	27.31	27.8247	0	18.3782	0	0	0	0	18.3782	0.116151
28	sp|Q9VDE5|PPAN_DROME	Q9VDE5	ppan	FBgn0010770	CG5786	9	9	9	27.0499	27.8774	0	18.3091	0	0	0	0	18.3091	0.116207
29	tr|Q8SWS7|Q8SWS7_DROME	Q8SWS7	vito	FBgn0052418	CG32418	6	6	6	27.1857	27.626	0	18.2706	0	0	0	0	18.2706	0.116142
30	sp|P48461|PP11_DROME	P48461	Pp1alpha-96A	FBgn0003134	CG6593	10	10	4	26.9886	27.1512	25.7049	26.6149	25.6872	0	0	8.56238	18.0525	0.10303
31	tr|Q9VKC1|Q9VKC1_DROME	Q9VKC1	RpL7-like	FBgn0032404	CG5317	7	7	7	26.8335	27.3118	0	18.0484	0	0	0	0	18.0484	0.116148
32	tr|Q9VPV7|Q9VPV7_DROME	Q9VPV7	gNacalpha	FBgn0031296	CG4415	6	6	6	26.8733	27.2573	0	18.0435	0	0	0	0	18.0435	0.116137
33	tr|Q9VQ35|Q9VQ35_DROME	Q9VQ35	mRpL48	FBgn0031357	CG17642	6	6	6	26.8576	26.9124	24.9573	26.2424	24.6297	0	0	8.20989	18.0325	0.0937194
34	tr|A0A0B4KFR1|A0A0B4KFR1_DROME	A0A0B4KFR1	Dmel\CG6693	FBgn0037878	CG6693	10	10	10	27.1077	26.9289	0	18.0122	0	0	0	0	18.0122	0.116121
35	tr|Q9W124|Q9W124_DROME	Q9W124	Dmel\CG4806	FBgn0260456	CG4806	12	12	12	26.8947	27.11	0	18.0016	0	0	0	0	18.0016	0.116123
36	tr|Q9VN39|Q9VN39_DROME	Q9VN39	Dmel\CG9775	FBgn0037261	CG9775	5	5	5	26.931	27.0672	0	17.9994	0	0	0	0	17.9994	0.116119
37	sp|Q9W3C2|NOP53_DROME	Q9W3C2	CG1785	FBgn0030061	CG1785	9	9	9	26.9256	27.0488	0	17.9915	0	0	0	0	17.9915	0.116119
38	tr|Q9VBH8|Q9VBH8_DROME	Q9VBH8	RpL34a	FBgn0039406	CG6090	6	2	2	28.7213	25.1475	0	17.9563	0	0	0	0	17.9563	0.117864
39	tr|O62531|O62531_DROME	O62531	AP-1mu	FBgn0024833	CG9388	14	14	14	26.5443	27.1882	0	17.9108	0	0	0	0	17.9108	0.116174
40	tr|O62530|O62530_DROME	O62530	AP-2mu	FBgn0263351	CG7057	10	10	10	26.7433	26.9679	0	17.9037	0	0	0	0	17.9037	0.116123
41	tr|A0A0B4K7H5|A0A0B4K7H5_DROME	A0A0B4K7H5	Mmp1	FBgn0035049	CG4859	8	8	8	26.9771	26.6657	0	17.8809	0	0	0	0	17.8809	0.11613
42	tr|B7YZI0|B7YZI0_DROME	B7YZI0	Vha44	FBgn0287825	CG8048	11	11	11	26.3813	27.2487	24.4048	26.0116	24.4927	0	0	8.16424	17.8473	0.0953269
43	tr|Q0E993|Q0E993_DROME	Q0E993	ValRS	FBgn0027079	CG4062	19	19	19	26.6192	26.8681	0	17.8291	0	0	0	0	17.8291	0.116125
44	tr|Q9VAA9|Q9VAA9_DROME	Q9VAA9	Jasper	FBgn0039743	CG7946	15	15	15	26.7318	26.6551	0	17.7956	0	0	0	0	17.7956	0.116117
45	sp|Q9VSS2|SRP68_DROME	Q9VSS2	Srp68	FBgn0035947	CG5064	15	15	15	26.4367	26.7986	0	17.7451	0	0	0	0	17.7451	0.116135
46	tr|M9PIA6|M9PIA6_DROME	M9PIA6	Mi-2	FBgn0262519	CG8103	20	20	19	26.5412	26.6775	0	17.7396	0	0	0	0	17.7396	0.116119
47	sp|Q9XY35|QCR9_DROME	Q9XY35	ox	FBgn0011227	CG8764	2	2	2	26.0712	26.9304	27.1066	26.7027	26.9171	0	0	8.97236	17.7304	0.119503
48	sp|P29843|HSP7A_DROME	P29843	Hsc70-1	FBgn0001216	CG8937	6	4	4	26.5046	26.6636	0	17.7227	0	0	0	0	17.7227	0.11612
49	tr|X2J8F5|X2J8F5_DROME	X2J8F5	Lsp1beta	FBgn0002563	CG4178	17	12	12	26.3612	26.668	0	17.6764	0	0	0	0	17.6764	0.11613
50	tr|E1JGY7|E1JGY7_DROME	E1JGY7	hlk	FBgn0010482	CG9432	21	4	4	26.3192	26.6065	0	17.6419	0	0	0	0	17.6419	0.116128
51	tr|Q9VTF8|Q9VTF8_DROME	Q9VTF8	mRpL2	FBgn0036135	CG7636	3	3	3	26.011	26.1968	24.4507	25.5528	23.8183	0	0	7.93944	17.6134	0.0913111
52	tr|M9MRF2|M9MRF2_DROME	M9MRF2	RpL37A	FBgn0261608	CG5827	2	2	2	26.2884	26.4717	0	17.5867	0	0	0	0	17.5867	0.116121
53	sp|Q9VHU1|DDX55_DROME	Q9VHU1	CG9630	FBgn0037561	CG9630	13	13	13	26.035	26.6324	0	17.5558	0	0	0	0	17.5558	0.116168
54	sp|Q24008|INAD_DROME	Q24008	inaD	FBgn0001263	CG3504	11	11	11	26.24	26.3845	0	17.5415	0	0	0	0	17.5415	0.11612
55	tr|M9MQH9|M9MQH9_DROME	M9MQH9	Pp2A-29B	FBgn0260439	CG17291	7	7	7	26.1056	26.4409	0	17.5155	0	0	0	0	17.5155	0.116133
56	tr|Q9VJZ1|Q9VJZ1_DROME	Q9VJZ1	anon-WO0118547.80	FBgn0032514	CG9302	10	10	10	26.1325	26.4074	0	17.5133	0	0	0	0	17.5133	0.116127
57	tr|Q9VSH0|Q9VSH0_DROME	Q9VSH0	CG7194	FBgn0035868	CG7194	11	11	11	26.0347	26.3982	0	17.4776	0	0	0	0	17.4776	0.116136
58	tr|A0A0B4LFB3|A0A0B4LFB3_DROME	A0A0B4LFB3	eIF3m	FBgn0033902	CG8309	9	9	9	26.0584	26.3258	0	17.4614	0	0	0	0	17.4614	0.116127
59	tr|Q8SXM8|Q8SXM8_DROME	Q8SXM8	LysRS	FBgn0027084	CG12141	11	11	11	26.1233	26.2344	0	17.4526	0	0	0	0	17.4526	0.116118
60	tr|Q06559|Q06559_DROME	Q06559	RpS3	FBgn0002622	CG6779	2	2	2	26.257	26.0546	0	17.4372	0	0	0	0	17.4372	0.116122
61	tr|Q7KM15|Q7KM15_DROME	Q7KM15	bic	FBgn0000181	CG3644	3	3	3	25.8442	26.4455	0	17.4299	0	0	0	0	17.4299	0.116169
62	sp|P24014|SLIT_DROME	P24014	sli	FBgn0264089	CG43758	21	21	21	26.2104	26.2021	25.732	26.0482	25.8594	0	0	8.6198	17.4284	0.113296
63	tr|Q9VYW4|Q9VYW4_DROME	Q9VYW4	Dmel\CG1703	FBgn0030321	CG1703	10	10	10	26.7372	25.3289	24.5275	25.5312	24.4459	0	0	8.14863	17.3826	0.1006
64	sp|P91926|AP2A_DROME	P91926	AP-2alpha	FBgn0264855	CG4260	14	14	14	25.6969	26.6777	24.1446	25.5064	24.377	0	0	8.12568	17.3807	0.100181
65	tr|A0A0B4LGQ1|A0A0B4LGQ1_DROME	A0A0B4LGQ1	Sod2	FBgn0010213	CG8905	4	4	4	25.8523	26.0723	26.4731	26.1326	0	26.2622	0	8.75405	17.3785	0.118155
66	tr|Q8IML6|Q8IML6_DROME	Q8IML6	Pdhb	FBgn0039635	CG11876	6	3	3	25.9761	26.1214	0	17.3658	0	0	0	0	17.3658	0.11612
67	sp|Q9VE04|RM55_DROME	Q9VE04	mRpL55	FBgn0038678	CG14283	3	3	3	26.3403	25.5042	24.3596	25.4014	0	24.1655	0	8.05515	17.3462	0.0982034
68	tr|Q7KMQ0|Q7KMQ0_DROME	Q7KMQ0	Rpt1	FBgn0028687	CG1341	11	11	11	25.8048	26.0966	0	17.3005	0	0	0	0	17.3005	0.116129
69	tr|Q9VQR9|Q9VQR9_DROME	Q9VQR9	Dmel\CG17593	FBgn0031544	CG17593	9	9	9	25.73	26.1117	0	17.2806	0	0	0	0	17.2806	0.116138
70	tr|Q9VMR9|Q9VMR9_DROME	Q9VMR9	BcDNA:RH62365	FBgn0031700	CG14022	2	2	2	0	25.7419	26.0656	17.2692	0	0	0	0	17.2692	0.116132
71	tr|X2JC82|X2JC82_DROME	X2JC82	Hsp27	FBgn0001226	CG4466	4	4	4	25.8314	26.2278	26.3621	26.1405	0	26.68	0	8.89334	17.2471	0.124518
72	tr|Q9VVK8|Q9VVK8_DROME	Q9VVK8	ais	FBgn0036754	CG5589	11	11	11	25.7372	25.8945	0	17.2106	0	0	0	0	17.2106	0.11612
73	tr|Q9VW54|Q9VW54_DROME	Q9VW54	Rpn1	FBgn0028695	CG7762	11	11	11	25.0774	26.2225	24.2871	25.1957	0	24.0017	0	8.00057	17.1951	0.0986484
74	tr|M9PDK5|M9PDK5_DROME	M9PDK5	VhaSFD	FBgn0027779	CG17332	10	10	10	25.7071	25.9057	25.2471	25.62	0	25.2962	0	8.43207	17.1879	0.111215
75	sp|P92177|1433E_DROME	P92177	14-3-3epsilon	FBgn0020238	CG31196	8	6	6	25.546	0	25.9706	17.1722	0	0	0	0	17.1722	0.116144
76	tr|E1JJA5|E1JJA5_DROME	E1JJA5	shi	FBgn0003392	CG18102	16	16	16	24.0724	25.5632	26.5364	25.3907	0	24.7031	0	8.23436	17.1563	0.106545
77	sp|Q9VPQ2|DJSHV_DROME	Q9VPQ2	shv	FBgn0031256	CG4164	6	6	6	25.4357	25.9888	0	17.1415	0	0	0	0	17.1415	0.116163
78	tr|Q9VCY1|Q9VCY1_DROME	Q9VCY1	Dmel\CG6937	FBgn0038989	CG6937	2	2	2	25.5627	25.683	0	17.0819	0	0	0	0	17.0819	0.116119
79	sp|P12982|PP12_DROME	P12982	Pp1-87B	FBgn0004103	CG5650	9	3	3	25.1246	26.0701	0	17.0649	0	0	0	0	17.0649	0.116252
80	tr|X2J5T3|X2J5T3_DROME	X2J5T3	Rab6	FBgn0015797	CG6601	3	3	2	25.1189	25.7506	25.5893	25.4863	0	25.341	0	8.44701	17.0392	0.113927
81	tr|M9PEL1|M9PEL1_DROME	M9PEL1	Rop	FBgn0004574	CG15811	7	7	7	25.2613	25.8016	0	17.021	0	0	0	0	17.021	0.116161
82	tr|E1JHA4|E1JHA4_DROME	E1JHA4	Hrb27C	FBgn0004838	CG10377	7	7	7	25.5736	25.714	25.0336	25.4404	0	25.3534	0	8.45112	16.9893	0.114839
83	sp|P35421|PUR4_DROME	P35421	Pfas	FBgn0000052	CG9127	13	13	13	25.5646	25.2351	24.5521	25.1173	24.4836	0	0	8.16121	16.9561	0.106473
84	tr|A1Z9J3|A1Z9J3_DROME	A1Z9J3	shot	FBgn0013733	CG18076	25	25	25	26.2641	24.2373	23.4631	24.6549	23.099	0	0	7.69966	16.9552	0.0937725
85	tr|Q9W402|Q9W402_DROME	Q9W402	ND-B16.6	FBgn0029868	CG3446	4	4	4	24.9657	25.8421	24.68	25.1626	0	24.6238	0	8.20792	16.9547	0.107989
86	sp|Q24186|RS5A_DROME	Q24186	RpS5a	FBgn0002590	CG8922	6	6	4	25.4229	25.3842	0	16.9357	0	0	0	0	16.9357	0.116117
87	sp|Q9V9S8|HEMH_DROME	Q9V9S8	FeCh	FBgn0266268	CG2098	9	9	9	25.047	25.4577	25.6538	25.3861	0	25.4729	0	8.49098	16.8952	0.11754
88	sp|Q9VH14|TIMP_DROME	Q9VH14	Timp	FBgn0025879	CG6281	5	5	5	25.8787	24.7824	0	16.887	0	0	0	0	16.887	0.116303
89	tr|Q24253|Q24253_DROME	Q24253	AP-1-2beta	FBgn0010380	CG12532	8	8	8	24.7874	25.7814	23.9719	24.8469	23.8891	0	0	7.96304	16.8839	0.101832
90	tr|Q9VM49|Q9VM49_DROME	Q9VM49	Caper	FBgn0031883	CG11266	6	6	6	25.0649	25.5668	0	16.8772	0	0	0	0	16.8772	0.116156
91	tr|M9PCL5|M9PCL5_DROME	M9PCL5	mRpS7	FBgn0032236	CG5108	4	4	4	25.3092	25.2803	0	16.8632	0	0	0	0	16.8632	0.116117
92	sp|Q9VI82|NOC3L_DROME	Q9VI82	CG1234	FBgn0037489	CG1234	10	10	10	25.1173	25.4719	0	16.8631	0	0	0	0	16.8631	0.116136
93	tr|Q9W414|Q9W414_DROME	Q9W414	Rpt4	FBgn0028685	CG3455	7	7	7	25.276	25.3108	0	16.8623	0	0	0	0	16.8623	0.116117
94	tr|Q9VAV2|Q9VAV2_DROME	Q9VAV2	mIF2	FBgn0039588	CG12413	9	9	9	24.9824	25.5221	0	16.8348	0	0	0	0	16.8348	0.116162
95	tr|Q9V9U9|Q9V9U9_DROME	Q9V9U9	BcDNA:RE07994	FBgn0039868	CG11563	6	6	6	25.1884	25.3048	0	16.8311	0	0	0	0	16.8311	0.116119
96	tr|X2JAJ8|X2JAJ8_DROME	X2JAJ8	Spn38F	FBgn0028986	CG9334	5	5	5	24.7287	25.5303	25.5325	25.2638	25.3269	0	0	8.44231	16.8215	0.117246
97	sp|P18432|MLR_DROME	P18432	Mlc2	FBgn0002773	CG2184	5	5	5	25.0679	25.3928	0	16.8202	0	0	0	0	16.8202	0.116133
98	tr|E2QD64|E2QD64_DROME	E2QD64	NO66	FBgn0266570	CG2982	4	4	4	24.9736	25.4768	0	16.8168	0	0	0	0	16.8168	0.116156
99	tr|Q9VFL9|Q9VFL9_DROME	Q9VFL9	CG9645	FBgn0053109	CG33109	7	7	7	25.4988	24.8913	0	16.7967	0	0	0	0	16.7967	0.116174
100	tr|Q9V3D9|Q9V3D9_DROME	Q9V3D9	Srp54k	FBgn0010747	CG4659	5	5	5	25.0195	25.3596	0	16.793	0	0	0	0	16.793	0.116135
101	sp|Q9VVW1|A76A_DROME	Q9VVW1	Acp76A	FBgn0015586	CG3801	5	5	5	24.7736	25.3092	25.5959	25.2262	25.3378	0	0	8.44592	16.7803	0.117991
102	tr|Q9VFR2|Q9VFR2_DROME	Q9VFR2	Dmel\CG9297	FBgn0038181	CG9297	8	8	8	25.1102	25.142	24.8413	25.0312	24.7759	0	0	8.25862	16.7725	0.112113
103	sp|Q9VUY9|PGM_DROME	Q9VUY9	Pgm1	FBgn0003076	CG5165	7	7	7	24.9888	25.3272	24.8109	25.0423	0	24.8121	0	8.27069	16.7716	0.112533
104	tr|Q8I0J3|Q8I0J3_DROME	Q8I0J3	mRpS21	FBgn0044511	CG32854	4	4	4	24.8677	25.3258	0	16.7312	0	0	0	0	16.7312	0.11615
105	tr|Q7K3V6|Q7K3V6_DROME	Q7K3V6	mEFTu2	FBgn0033184	CG12736	6	6	6	24.814	25.3765	0	16.7302	0	0	0	0	16.7302	0.116166
106	tr|Q9VKZ8|Q9VKZ8_DROME	Q9VKZ8	Usp14	FBgn0032216	CG5384	6	6	6	24.8957	25.2253	24.417	24.846	0	24.5035	0	8.16783	16.6782	0.110806
107	tr|A0A0B4KFB8|A0A0B4KFB8_DROME	A0A0B4KFB8	CG42724	FBgn0261641	CG42724	10	10	10	25.2449	24.782	0	16.6756	0	0	0	0	16.6756	0.116151
108	tr|B5RJQ0|B5RJQ0_DROME	B5RJQ0	Ldh	FBgn0001258	CG10160	6	6	6	24.5565	24.7821	24.2002	24.5129	0	23.54	0	7.84667	16.6662	0.100944
109	tr|Q9VRL1|Q9VRL1_DROME	Q9VRL1	Uev1A	FBgn0035601	CG10640	4	4	4	25.5528	24.1113	25.5342	25.0661	25.2519	0	0	8.4173	16.6488	0.119517
110	sp|O77410|EIF3E_DROME	O77410	eIF3e	FBgn0025582	CG9677	8	8	8	24.7539	25.1608	0	16.6382	0	0	0	0	16.6382	0.116143
111	tr|Q8T4G5|Q8T4G5_DROME	Q8T4G5	Afg3l2	FBgn0036702	CG6512	9	9	9	24.5977	25.2956	0	16.6311	0	0	0	0	16.6311	0.116194
112	tr|M9PH10|M9PH10_DROME	M9PH10	comt	FBgn0000346	CG1618	10	10	10	24.4111	25.2856	24.6086	24.7684	0	24.4615	0	8.15384	16.6146	0.111377
113	tr|Q9V405|Q9V405_DROME	Q9V405	Rpt3	FBgn0028686	CG16916	8	8	8	24.878	24.9595	0	16.6125	0	0	0	0	16.6125	0.116118
114	tr|E2QCG7|E2QCG7_DROME	E2QCG7	eIF3b	FBgn0034237	CG4878	8	8	8	24.7641	24.9915	24.4054	24.7203	0	24.4767	0	8.15889	16.5614	0.112287
115	sp|Q9W2D9|EIF3K_DROME	Q9W2D9	eIF3k	FBgn0034654	CG10306	4	4	4	25.2499	24.4097	0	16.5532	0	0	0	0	16.5532	0.11623
116	sp|P41375|IF2B_DROME	P41375	eIF2beta	FBgn0004926	CG4153	8	8	8	25.0278	24.6052	0	16.5443	0	0	0	0	16.5443	0.116145
117	tr|Q9VN44|Q9VN44_DROME	Q9VN44	Karybeta3	FBgn0087013	CG1059	7	7	7	24.696	24.9343	0	16.5435	0	0	0	0	16.5435	0.116126
118	tr|Q9V434|Q9V434_DROME	Q9V434	AsnRS	FBgn0086443	CG10687	8	8	8	24.8483	24.7705	0	16.5396	0	0	0	0	16.5396	0.116118
119	tr|A1ZA22|A1ZA22_DROME	A1ZA22	eIF2Bgamma	FBgn0034029	CG8190	8	8	8	24.6914	24.8873	0	16.5262	0	0	0	0	16.5262	0.116123
120	tr|Q9VK69|Q9VK69_DROME	Q9VK69	CCT4	FBgn0032444	CG5525	5	5	5	24.8447	24.6978	0	16.5142	0	0	0	0	16.5142	0.11612
121	tr|A8DYI3|A8DYI3_DROME	A8DYI3	Pepck2	FBgn0034356	CG10924	6	6	5	24.6587	24.8668	0	16.5085	0	0	0	0	16.5085	0.116124
122	tr|M9PE30|M9PE30_DROME	M9PE30	Chd64	FBgn0035499	CG14996	5	5	5	24.7661	24.3255	24.4091	24.5002	0	24.0159	0	8.0053	16.4949	0.108427
123	tr|A1Z6L9|A1Z6L9_DROME	A1Z6L9	Trap1	FBgn0026761	CG3152	7	7	7	24.7826	24.7365	24.1747	24.5646	24.2195	0	0	8.07316	16.4914	0.110673
124	sp|P54362|AP3D_DROME	P54362	g	FBgn0001087	CG10986	6	6	6	24.2328	25.1476	0	16.4601	0	0	0	0	16.4601	0.116253
125	tr|Q9VDT5|Q9VDT5_DROME	Q9VDT5	anon-WO02059370.13	FBgn0038738	CG4572	3	3	3	24.7419	24.6296	0	16.4572	0	0	0	0	16.4572	0.116119
126	sp|Q94901|LARK_DROME	Q94901	lark	FBgn0011640	CG8597	5	5	5	24.4438	24.6495	24.8188	24.6374	0	24.5424	0	8.18082	16.4566	0.114612
127	tr|Q8MSC4|Q8MSC4_DROME	Q8MSC4	BigH1	FBgn0038252	CG3509	4	4	4	24.4569	24.8478	0	16.4349	0	0	0	0	16.4349	0.116142
128	tr|E2QD65|E2QD65_DROME	E2QD65	RpS19a	FBgn0010412	CG4464	5	5	5	25.4099	24.4946	24.1413	24.6819	0	24.7667	0	8.25558	16.4264	0.117767
129	tr|M9PD18|M9PD18_DROME	M9PD18	Vha68-1	FBgn0265262	CG12403	14	6	6	24.5041	24.8413	24.3238	24.5564	24.4647	0	0	8.1549	16.4015	0.114681
130	tr|Q9VL75|Q9VL75_DROME	Q9VL75	Bka	FBgn0010520	CG4539	3	3	3	24.6777	24.5205	0	16.3994	0	0	0	0	16.3994	0.116121
131	tr|Q9V400|Q9V400_DROME	Q9V400	Ilk	FBgn0028427	CG10504	6	6	6	24.3151	24.8691	0	16.3947	0	0	0	0	16.3947	0.116167
132	tr|Q0KHQ1|Q0KHQ1_DROME	Q0KHQ1	SLIRP1	FBgn0064117	CG33714	4	4	4	24.3941	24.782	0	16.392	0	0	0	0	16.392	0.116141
133	tr|H5V895|H5V895_DROME	H5V895	flw	FBgn0000711	CG2096	6	4	2	24.3431	24.8285	0	16.3905	0	0	0	0	16.3905	0.116155
134	tr|Q9I7J0|Q9I7J0_DROME	Q9I7J0	Dmel\CG5023	FBgn0038774	CG5023	3	3	3	24.3272	24.8284	0	16.3852	0	0	0	0	16.3852	0.116158
135	tr|X2JD07|X2JD07_DROME	X2JD07	l(1)G0020	FBgn0027330	CG1994	7	7	7	24.1242	25.0257	0	16.3833	0	0	0	0	16.3833	0.11625
136	tr|Q9VJ28|Q9VJ28_DROME	Q9VJ28	L2HGDH	FBgn0032729	CG10639	7	7	7	24.2768	25.2203	24.021	24.506	24.4005	0	0	8.13351	16.3725	0.114675
137	tr|X2J950|X2J950_DROME	X2J950	RpS13	FBgn0010265	CG13389	2	2	2	23.7989	25.3051	0	16.368	0	0	0	0	16.368	0.116491
138	tr|A4UZW2|A4UZW2_DROME	A4UZW2	Sam-S	FBgn0005278	CG2674	3	3	3	24.8146	24.2857	0	16.3667	0	0	0	0	16.3667	0.116163
139	sp|P48596|GCH1_DROME	P48596	Pu	FBgn0003162	CG9441	4	4	4	23.8587	0	25.237	16.3652	0	0	0	0	16.3652	0.11643
140	tr|X2JDR5|X2JDR5_DROME	X2JDR5	dhd	FBgn0011761	CG4193	2	2	2	24.2363	24.8306	0	16.3556	0	0	0	0	16.3556	0.116175
141	tr|M9PF14|M9PF14_DROME	M9PF14	tral	FBgn0041775	CG10686	7	7	7	25.1764	0	23.8515	16.3426	0	0	0	0	16.3426	0.116407
142	sp|P32234|128UP_DROME	P32234	128up	FBgn0010339	CG8340	6	6	6	24.1413	24.8677	0	16.3363	0	0	0	0	16.3363	0.116204
143	tr|Q9VLI0|Q9VLI0_DROME	Q9VLI0	LManV	FBgn0032068	CG9466	7	4	3	24.3137	24.6757	0	16.3298	0	0	0	0	16.3298	0.116138
144	tr|Q9VS02|Q9VS02_DROME	Q9VS02	Dmel\CG9953	FBgn0035726	CG9953	6	6	6	24.9551	0	24.0134	16.3228	0	0	0	0	16.3228	0.116264
145	tr|Q9VAC4|Q9VAC4_DROME	Q9VAC4	Nph	FBgn0039735	CG7911	4	4	4	0	24.8604	24.0704	16.3102	0	0	0	0	16.3102	0.11622
146	tr|Q8IN56|Q8IN56_DROME	Q8IN56	Orp8	FBgn0261550	CG42668	8	8	8	24.4392	24.4474	0	16.2955	0	0	0	0	16.2955	0.116117
147	sp|Q9VP47|TSR1_DROME	Q9VP47	Tsr1	FBgn0037073	CG7338	5	5	5	24.3151	24.568	0	16.2944	0	0	0	0	16.2944	0.116127
148	sp|Q9V7Y2|SGPL_DROME	Q9V7Y2	Sply	FBgn0010591	CG8946	4	4	4	24.2378	24.6377	0	16.2918	0	0	0	0	16.2918	0.116143
149	sp|Q9W3U1|SETD3_DROME	Q9W3U1	Setd3	FBgn0052732	CG32732	6	6	6	24.3257	24.5091	0	16.2783	0	0	0	0	16.2783	0.116122
150	tr|H8F4T6|H8F4T6_DROME	H8F4T6	CG16935-RA	FBgn0033883	CG16935	6	6	6	24.5086	24.2845	0	16.2644	0	0	0	0	16.2644	0.116125
151	sp|Q9VJC7|EFTS_DROME	Q9VJC7	mEFTs	FBgn0032646	CG6412	6	6	6	24.3301	24.4424	0	16.2575	0	0	0	0	16.2575	0.116119
152	sp|Q9W4P5|VA0D1_DROME	Q9W4P5	VhaAC39-1	FBgn0285910	CG2934	5	5	5	24.0761	24.6922	0	16.2561	0	0	0	0	16.2561	0.11618
153	tr|X2JC31|X2JC31_DROME	X2JC31	Chc	FBgn0000319	CG9012	11	11	11	24.1551	24.554	0	16.2364	0	0	0	0	16.2364	0.116143
154	sp|Q9V3P6|PSMD1_DROME	Q9V3P6	Rpn2	FBgn0028692	CG11888	9	9	9	23.7612	24.902	0	16.2211	0	0	0	0	16.2211	0.116335
155	sp|Q9VN13|SFXN1_DROME	Q9VN13	Sfxn1-3	FBgn0037239	CG11739	4	4	4	24.0181	24.5355	0	16.1845	0	0	0	0	16.1845	0.116162
156	sp|P07701|SGS5_DROME	P07701	Sgs5	FBgn0003375	CG7596	4	4	4	24.5343	23.9996	0	16.178	0	0	0	0	16.178	0.116165
157	tr|Q9VBT7|Q9VBT7_DROME	Q9VBT7	Dmel\CG10513	FBgn0039311	CG10513	5	5	5	24.2345	24.1232	24.2329	24.1969	24.0584	0	0	8.01946	16.1774	0.113854
158	tr|Q8IQZ8|Q8IQZ8_DROME	Q8IQZ8	Fim	FBgn0024238	CG8649	6	6	6	24.0351	24.4893	0	16.1748	0	0	0	0	16.1748	0.116151
159	tr|Q8MZI3|Q8MZI3_DROME	Q8MZI3	BcDNA:HL07910	FBgn0035720	CG10077	10	7	7	24.154	0	24.3485	16.1675	0	0	0	0	16.1675	0.116123
160	tr|A1ZB68|A1ZB68_DROME	A1ZB68	GstE3	FBgn0063497	CG17524	4	4	4	23.9874	24.5032	0	16.1635	0	0	0	0	16.1635	0.116162
161	tr|Q0E8X6|Q0E8X6_DROME	Q0E8X6	eIF2Bdelta	FBgn0034858	CG10315	5	5	5	23.9177	24.5325	0	16.1501	0	0	0	0	16.1501	0.116181
162	sp|O18413|PRS8_DROME	O18413	Rpt6	FBgn0020369	CG1489	6	5	5	23.919	24.515	0	16.1446	0	0	0	0	16.1446	0.116177
163	sp|O18404|HCD2_DROME	O18404	scu	FBgn0021765	CG7113	4	4	4	23.746	0	24.6788	16.1416	0	0	0	0	16.1416	0.116264
164	tr|Q8IQZ1|Q8IQZ1_DROME	Q8IQZ1	Gss2	FBgn0030882	CG32495	5	5	5	23.8886	24.4354	23.7585	24.0275	23.7607	0	0	7.92024	16.1072	0.111832
165	tr|Q9VD14|Q9VD14_DROME	Q9VD14	Dmel\CG13850	FBgn0038961	CG13850	5	5	5	23.9039	24.321	24.0851	24.1033	0	23.9905	0	7.99683	16.1065	0.114292
166	tr|Q53ZT0|Q53ZT0_DROME	Q53ZT0	DnaJ-1	FBgn0263106	CG10578	6	6	6	24.1238	24.1428	0	16.0889	0	0	0	0	16.0889	0.116117
167	tr|O61380|O61380_DROME	O61380	eIF4G1	FBgn0023213	CG10811	12	12	12	24.6725	24.1385	23.969	24.26	0	24.5437	0	8.18125	16.0788	0.120907
168	tr|Q9V428|Q9V428_DROME	Q9V428	ics	FBgn0028546	CG9031	4	4	4	23.6788	24.5419	0	16.0736	0	0	0	0	16.0736	0.116244
169	tr|Q7JXC4|Q7JXC4_DROME	Q7JXC4	P32	FBgn0034259	CG6459	4	4	4	25.0079	23.9581	23.6229	24.1963	24.3736	0	0	8.12453	16.0718	0.119405
170	tr|Q9VI66|Q9VI66_DROME	Q9VI66	CG2640	FBgn0051248	CG31248	4	4	4	23.55	24.6044	0	16.0515	0	0	0	0	16.0515	0.116307
171	sp|Q9U9Q4|EIF3H_DROME	Q9U9Q4	eIF3h	FBgn0022023	CG9124	5	5	5	24.1321	23.9968	0	16.043	0	0	0	0	16.043	0.11612
172	tr|Q9W2M4|Q9W2M4_DROME	Q9W2M4	Dmel\CG10527	FBgn0034583	CG10527	4	4	4	23.9429	0	24.1681	16.037	0	0	0	0	16.037	0.116125
173	tr|Q8I725|Q8I725_DROME	Q8I725	Dmel\CG1236	FBgn0037370	CG1236	6	6	6	23.8162	24.255	0	16.0237	0	0	0	0	16.0237	0.11615
174	tr|Q9VGF7|Q9VGF7_DROME	Q9VGF7	GC1	FBgn0260743	CG18347	5	5	5	24.1271	23.7771	23.9079	23.9374	0	23.7504	0	7.91681	16.0205	0.113053
175	tr|Q9VJ74|Q9VJ74_DROME	Q9VJ74	Dmel\CG10333	FBgn0032690	CG10333	5	5	5	23.8241	24.1837	0	16.0026	0	0	0	0	16.0026	0.116139
176	tr|A1ZBE9|A1ZBE9_DROME	A1ZBE9	MetRS	FBgn0034401	CG15100	7	7	7	23.6686	24.3236	0	15.9974	0	0	0	0	15.9974	0.116191
177	sp|Q7KR04|RS15B_DROME	Q7KR04	RpS15Ab	FBgn0033555	CG12324	7	2	2	23.984	23.9876	0	15.9905	0	0	0	0	15.9905	0.116117
178	tr|A0A0B4KI38|A0A0B4KI38_DROME	A0A0B4KI38	Dmel\CG11334	FBgn0039849	CG11334	3	3	3	23.9178	24.0473	0	15.9884	0	0	0	0	15.9884	0.116119
179	sp|P52295|IMA_DROME	P52295	Pen	FBgn0287720	CG4799	5	5	5	24.0924	23.7789	0	15.9571	0	0	0	0	15.9571	0.116134
180	tr|Q59E09|Q59E09_DROME	Q59E09	AcCoAS	FBgn0012034	CG9390	2	2	2	23.7026	24.1422	0	15.9483	0	0	0	0	15.9483	0.11615
181	tr|M9PD08|M9PD08_DROME	M9PD08	eRF3	FBgn0020443	CG6382	6	6	6	23.8132	0	24.0287	15.9473	0	0	0	0	15.9473	0.116125
182	sp|Q9W1X4|NU214_DROME	Q9W1X4	Nup214	FBgn0010660	CG3820	6	6	6	0	23.288	24.5422	15.9434	0	0	0	0	15.9434	0.11639
183	tr|A0A0B4LEV3|A0A0B4LEV3_DROME	A0A0B4LEV3	Dmel\CG8635	FBgn0033317	CG8635	3	3	3	24.4537	0	23.356	15.9365	0	0	0	0	15.9365	0.116326
184	tr|Q9VKZ7|Q9VKZ7_DROME	Q9VKZ7	Q9VKZ7_DROME	FBgn0032217	CG4972	3	3	3	23.4438	24.3582	0	15.934	0	0	0	0	15.934	0.116262
185	sp|Q9V3J4|SEC13_DROME	Q9V3J4	Sec13	FBgn0024509	CG6773	3	3	3	23.9863	0	23.7579	15.9147	0	0	0	0	15.9147	0.116126
186	tr|Q2PDR9|Q2PDR9_DROME	Q2PDR9	vari	FBgn0250785	CG9326	5	5	5	23.6219	24.073	0	15.8983	0	0	0	0	15.8983	0.116152
187	tr|Q9VJ86|Q9VJ86_DROME	Q9VJ86	bsf	FBgn0284256	CG10302	6	6	6	24.0336	23.6157	0	15.8831	0	0	0	0	15.8831	0.116147
188	tr|A0A0B4LEY0|A0A0B4LEY0_DROME	A0A0B4LEY0	Rab32	FBgn0002567	CG8024	4	4	4	23.72	23.8837	24.2449	23.9495	24.2007	0	0	8.06689	15.8827	0.120375
189	tr|Q9W5R8|RL5_DROME	Q9W5R8	RpL5	FBgn0064225	CG17489	2	2	2	23.5893	24.0481	0	15.8791	0	0	0	0	15.8791	0.116153
190	tr|Q9V3I2|Q9V3I2_DROME	Q9V3I2	Rab5	FBgn0014010	CG3664	4	4	4	23.0866	0	24.4477	15.8448	0	0	0	0	15.8448	0.116443
191	tr|Q8SXC2|Q8SXC2_DROME	Q8SXC2	Kyat	FBgn0037955	CG6950	3	3	3	23.6783	23.8315	0	15.8366	0	0	0	0	15.8366	0.116121
192	tr|Q9Y166|Q9Y166_DROME	Q9Y166	Dic1	FBgn0027610	CG8790	2	2	2	0	23.8794	23.5947	15.8247	0	0	0	0	15.8247	0.116131
193	tr|A0A0B4LEY9|A0A0B4LEY9_DROME	A0A0B4LEY9	Non1	FBgn0028473	CG8801	5	5	5	23.7606	23.6924	0	15.8177	0	0	0	0	15.8177	0.116117
194	tr|Q7KVW2|Q7KVW2_DROME	Q7KVW2	Pop1	FBgn0026702	CG32763	3	3	3	23.5813	23.7313	0	15.7709	0	0	0	0	15.7709	0.116121
195	tr|Q8MRW1|Q8MRW1_DROME	Q8MRW1	Tim23	FBgn0267976	CG40042	2	2	2	23.0874	24.0011	23.5171	23.5352	23.468	0	0	7.82266	15.7125	0.115133
196	tr|M9NFL1|M9NFL1_DROME	M9NFL1	eIF5B	FBgn0026259	CG10840	3	3	3	23.8453	23.2747	0	15.7067	0	0	0	0	15.7067	0.116175
197	tr|Q9VB23|Q9VB23_DROME	Q9VB23	wdb	FBgn0027492	CG5643	3	3	3	23.2647	23.8195	0	15.6947	0	0	0	0	15.6947	0.116172
198	tr|Q9VV60|Q9VV60_DROME	Q9VV60	TyrRS	FBgn0027080	CG4561	4	4	4	23.3549	23.7283	0	15.6944	0	0	0	0	15.6944	0.116142
199	sp|Q8I0G5|COPG_DROME	Q8I0G5	gammaCOP	FBgn0028968	CG1528	4	4	4	23.0601	23.9746	0	15.6782	0	0	0	0	15.6782	0.116267
200	sp|P48591|RIR1_DROME	P48591	RnrL	FBgn0011703	CG5371	7	7	7	23.2799	23.7357	0	15.6719	0	0	0	0	15.6719	0.116154
201	tr|M9PBB5|M9PBB5_DROME	M9PBB5	vas	FBgn0283442	CG46283	3	3	3	23.1351	23.8276	0	15.6543	0	0	0	0	15.6543	0.116203
202	tr|Q7K1W5|Q7K1W5_DROME	Q7K1W5	Dmel\CG8187	FBgn0034027	CG8187	4	4	4	23.4916	23.438	0	15.6432	0	0	0	0	15.6432	0.116117
203	tr|X2JAI2|X2JAI2_DROME	X2JAI2	Arpc2	FBgn0032859	CG10954	6	6	6	23.3062	23.5	0	15.6021	0	0	0	0	15.6021	0.116123
204	tr|Q7JVZ8|Q7JVZ8_DROME	Q7JVZ8	GstE11	FBgn0034354	CG5224	3	3	3	23.309	23.3827	0	15.5639	0	0	0	0	15.5639	0.116118
205	sp|P17210|KINH_DROME	P17210	Khc	FBgn0001308	CG7765	5	5	5	23.2761	23.2412	0	15.5058	0	0	0	0	15.5058	0.116117
206	tr|M9MRU0|M9MRU0_DROME	M9MRU0	wb	FBgn0261563	CG42677	6	6	6	23.1658	23.4244	23.1127	23.2343	0	23.2451	0	7.74835	15.4859	0.116322
207	tr|E1JIK0|E1JIK0_DROME	E1JIK0	Hrb87F	FBgn0004237	CG12749	2	2	2	23.2996	23.1156	0	15.4718	0	0	0	0	15.4718	0.116123
208	sp|Q7K2B0|RRP8_DROME	Q7K2B0	CG7137	FBgn0034422	CG7137	4	4	4	23.4239	22.9831	0	15.469	0	0	0	0	15.469	0.116152
209	tr|Q9VQI5|Q9VQI5_DROME	Q9VQI5	Ifrd1	FBgn0051694	CG31694	3	3	3	22.7989	23.5425	0	15.4471	0	0	0	0	15.4471	0.116219
210	tr|M9PCE8|M9PCE8_DROME	M9PCE8	Acer	FBgn0016122	CG10593	6	6	6	22.8284	23.314	23.7078	23.2834	23.5706	0	0	7.85686	15.4265	0.121218
211	sp|P06604|TBA2_DROME	P06604	alphaTub85E	FBgn0003886	CG9476	14	3	3	23.1302	23.1485	0	15.4262	0	0	0	0	15.4262	0.116117
212	tr|Q95SI7|Q95SI7_DROME	Q95SI7	Dmel\CG6028	FBgn0038924	CG6028	2	2	2	23.2292	0	23.0313	15.4202	0	0	0	0	15.4202	0.116124
213	sp|P54353|DOD_DROME	P54353	dod	FBgn0015379	CG17051	2	2	2	22.7731	23.0761	0	15.2831	0	0	0	0	15.2831	0.116134
214	sp|Q9W020|NOM1_DROME	Q9W020	CG9004	FBgn0035336	CG9004	2	2	2	22.9087	22.8783	0	15.2623	0	0	0	0	15.2623	0.116117
215	tr|Q9VGE7|Q9VGE7_DROME	Q9VGE7	Ect3	FBgn0260746	CG3132	3	3	3	22.5944	22.7336	0	15.1093	0	0	0	0	15.1093	0.11612
216	tr|Q9VXI3|Q9VXI3_DROME	Q9VXI3	ERp44	FBgn0030734	CG9911	4	4	4	22.8022	22.897	23.0777	22.9256	23.4786	0	0	7.82622	15.0994	0.125926
217	sp|Q9W107|SYYM_DROME	Q9W107	TyrRS-m	FBgn0035064	CG16912	3	3	3	22.2731	22.8664	0	15.0465	0	0	0	0	15.0465	0.116185
218	sp|Q9VXN4|SYRC_DROME	Q9VXN4	ArgRS	FBgn0027093	CG9020	2	2	2	22.2398	22.7316	0	14.9905	0	0	0	0	14.9905	0.116164
219	sp|Q9NHD5|SAN_DROME	Q9NHD5	san	FBgn0024188	CG12352	2	2	2	22.085	22.5506	0	14.8785	0	0	0	0	14.8785	0.11616
220	tr|Q9V9A9|Q9V9A9_DROME	Q9V9A9	hlk	FBgn0010482	CG9432	43	43	26	29.9144	30.235	23.5393	27.8962	22.3063	22.8084	0	15.0382	12.858	0.175915
221	tr|X2J5G6|X2J5G6_DROME	X2J5G6	RpL7	FBgn0005593	CG4897	18	18	18	32.0301	31.8304	27.1225	30.3277	27.04	27.606	0	18.2153	12.1123	0.2605
222	tr|Q7JQN4|Q7JQN4_DROME	Q7JQN4	Rs1	FBgn0021995	CG2173	27	27	27	29.5026	29.6039	0	19.7022	0	23.0627	0	7.68758	12.0146	0.390752
223	tr|Q9W499|Q9W499_DROME	Q9W499	RpL35	FBgn0029785	CG4111	3	3	3	29.4453	29.6849	0	19.7101	0	25.812	0	8.60401	11.1061	0.443747
224	tr|A4V383|A4V383_DROME	A4V383	ND-42	FBgn0019957	CG6343	17	17	17	29.9383	30.4302	27.415	29.2612	27.3122	27.3296	0	18.2139	11.0472	0.294022
225	tr|Q0E924|Q0E924_DROME	Q0E924	Phb2	FBgn0010551	CG15081	14	14	14	28.9677	30.4953	28.3966	29.2865	27.7484	28.1593	0	18.6359	10.6506	0.317781
226	tr|Q9VFV9|Q9VFV9_DROME	Q9VFV9	Droj2	FBgn0038145	CG8863	15	15	15	27.8157	27.7138	26.3661	27.2985	25.0709	24.9418	0	16.6709	10.6276	0.271978
227	tr|M9PG47|M9PG47_DROME	M9PG47	RpS26	FBgn0261597	CG10305	3	3	3	30.8908	28.9585	26.7251	28.8581	0	27.7329	27.7334	18.4888	10.3694	0.328349
228	tr|Q9W1G7|Q9W1G7_DROME	Q9W1G7	Nap1	FBgn0015268	CG5330	12	12	12	27.9229	28.2627	26.1149	27.4335	25.8407	26.0876	0	17.3094	10.1241	0.308296
229	tr|A0A0B4LHS1|A0A0B4LHS1_DROME	A0A0B4LHS1	Mlc1	FBgn0002772	CG5596	6	6	6	28.2191	29.5939	28.0414	28.6181	27.6182	27.9502	0	18.5228	10.0953	0.337581
230	tr|Q86B73|Q86B73_DROME	Q86B73	Doa	FBgn0265998	CG42320	11	11	2	27.384	27.9494	23.9631	26.4322	25.0892	23.9945	0	16.3612	10.071	0.290779
231	tr|Q9VM69|Q9VM69_DROME	Q9VM69	nop5	FBgn0026196	CG10206	13	13	13	26.6262	27.1387	0	17.9216	23.57	0	0	7.85666	10.065	0.445941
232	tr|Q9W086|Q9W086_DROME	Q9W086	mRpL46	FBgn0035272	CG13922	8	8	8	27.959	27.8421	0	18.6004	25.7889	0	0	8.59628	10.0041	0.473761
233	tr|M9NDX3|M9NDX3_DROME	M9NDX3	Top1	FBgn0004924	CG6146	21	21	21	28.204	27.8862	24.3477	26.8126	24.9032	0	25.699	16.8674	9.94527	0.308272
234	tr|Q95WY3|Q95WY3_DROME	Q95WY3	Nop56	FBgn0038964	CG13849	10	10	10	26.6956	26.5686	0	17.7548	23.6419	0	0	7.88062	9.87414	0.452292
235	tr|Q9V4E0|Q9V4E0_DROME	Q9V4E0	ND-49	FBgn0039909	CG1970	11	11	11	27.7383	28.309	26.8964	27.6479	26.7591	26.8087	0	17.8559	9.79196	0.334786
236	tr|Q76NQ0|Q76NQ0_DROME	Q76NQ0	CG5364	FBgn0053303	CG33303	11	11	11	26.929	26.5085	25.0307	26.156	24.3987	24.7308	0	16.3765	9.77956	0.299384
237	tr|Q7K5K3|Q7K5K3_DROME	Q7K5K3	Pdhb	FBgn0039635	CG11876	15	15	12	29.4477	29.5972	29.3732	29.4727	29.6832	29.5418	0	19.7417	9.73103	0.380038
238	tr|Q8IP94|Q8IP94_DROME	Q8IP94	ThrRS	FBgn0027081	CG5353	12	12	12	26.3742	26.3273	24.6155	25.7723	23.4179	24.7116	0	16.0432	9.72917	0.293434
239	sp|P23128|DDX6_DROME	P23128	me31B	FBgn0004419	CG4916	15	15	15	26.4097	27.8291	26.7691	27.0026	25.8212	26.0616	0	17.2943	9.70836	0.324914
240	tr|X2JCV2|X2JCV2_DROME	X2JCV2	Lsp2	FBgn0002565	CG6806	11	11	11	26.7162	25.6491	24.8806	25.7486	23.8272	24.3344	0	16.0538	9.69479	0.294639
241	tr|Q9W1B9|Q9W1B9_DROME	Q9W1B9	RpL12	FBgn0034968	CG3195	5	5	5	28.2388	28.6304	28.0922	28.3205	27.9444	28.042	0	18.6621	9.65836	0.35917
242	sp|P45594|CADF_DROME	P45594	tsr	FBgn0011726	CG4254	9	9	9	28.9266	28.89	28.6012	28.8059	28.7503	28.7049	0	19.1517	9.65418	0.37043
243	tr|Q8IPE8|Q8IPE8_DROME	Q8IPE8	Mtpalpha	FBgn0028479	CG4389	17	17	17	26.9779	27.2954	25.8592	26.7108	25.9831	25.4113	0	17.1315	9.57935	0.326678
244	tr|A0A126GUT1|A0A126GUT1_DROME	A0A126GUT1	Tctp	FBgn0037874	CG4800	7	7	7	27.2413	27.1913	25.6777	26.7034	25.8377	25.5416	0	17.1265	9.57696	0.326814
245	sp|Q9VN25|EIF3A_DROME	Q9VN25	eIF3a	FBgn0037249	CG9805	22	22	22	26.8648	27.0162	25.6496	26.5102	25.157	25.6594	0	16.9388	9.57139	0.322217
246	tr|B7YZP9|B7YZP9_DROME	B7YZP9	Mlp60A	FBgn0259209	CG42309	12	11	8	27.8371	28.13	27.3825	27.7832	27.3382	27.3329	0	18.2237	9.5595	0.353445
247	tr|Q7JUS9|Q7JUS9_DROME	Q7JUS9	Mpcp1	FBgn0034497	CG9090	10	10	9	26.5731	28.0149	26.7582	27.1154	26.4878	26.1808	0	17.5562	9.55921	0.337964
248	sp|Q9VTU4|EIF3L_DROME	Q9VTU4	eIF3l	FBgn0036258	CG5642	9	9	9	27.3869	27.434	25.6517	26.8242	25.8876	25.9469	0	17.2782	9.54602	0.332139
249	tr|A0A023GPM5|A0A023GPM5_DROME	A0A023GPM5	rdgA	FBgn0261549	CG42667	13	13	13	26.4238	26.4303	0	17.618	0	24.2753	0	8.09175	9.52627	0.470384
250	tr|Q9VM12|Q9VM12_DROME	Q9VM12	Dmel\CG5958	FBgn0031913	CG5958	10	10	10	27.3625	27.1959	26.2572	26.9385	26.213	26.0543	0	17.4224	9.51611	0.336379
251	sp|Q9VFC8|GYS_DROME	Q9VFC8	GlyS	FBgn0266064	CG6904	20	20	20	27.4548	28.0156	27.3861	27.6188	27.2265	27.0885	0	18.105	9.51383	0.352683
252	tr|Q9VGZ3|Q9VGZ3_DROME	Q9VGZ3	Irp-1B	FBgn0024957	CG6342	27	27	21	27.9627	27.9037	27.2029	27.6898	27.076	27.5279	0	18.2013	9.48849	0.35619
253	sp|P21187|PABP_DROME	P21187	pAbp	FBgn0265297	CG5119	14	14	14	27.4648	27.6518	26.9663	27.361	26.8303	26.7918	0	17.874	9.48696	0.3484
254	sp|O97125|HSP68_DROME	O97125	Hsp68	FBgn0001230	CG5436	11	9	7	27.433	27.995	27.2197	27.5493	27.2363	26.9602	0	18.0655	9.48375	0.353153
255	sp|Q9VZU4|NDUS3_DROME	Q9VZU4	ND-30	FBgn0266582	CG12079	8	8	8	27.4119	27.3488	26.122	26.9609	26.216	26.2374	0	17.4845	9.47645	0.339832
256	tr|Q9VT32|Q9VT32_DROME	Q9VT32	Prps	FBgn0036030	CG6767	9	9	9	26.7102	26.7757	25.819	26.435	25.7625	25.1636	0	16.9754	9.45958	0.327876
257	tr|M9PD14|M9PD14_DROME	M9PD14	fln	FBgn0005633	CG7445	8	8	8	27.8607	27.9338	26.9048	27.5665	27.0136	27.385	0	18.1329	9.43358	0.357182
258	tr|Q9VHL2|Q9VHL2_DROME	Q9VHL2	CCT7	FBgn0037632	CG8351	16	16	16	27.0618	27.0839	25.9489	26.6982	25.9207	25.8934	0	17.2714	9.42682	0.336748
259	tr|Q9W0E4|Q9W0E4_DROME	Q9W0E4	Psa	FBgn0261243	CG1009	22	22	22	27.0429	27.55	25.4981	26.697	26.0203	25.8843	0	17.3015	9.39551	0.339599
260	tr|Q9VQB4|Q9VQB4_DROME	Q9VQB4	Dmel\CG3609	FBgn0031418	CG3609	10	10	10	26.9933	27.1772	26.7036	26.958	26.4562	26.2526	0	17.5696	9.38846	0.345465
261	tr|Q9W1H8|Q9W1H8_DROME	Q9W1H8	Mtpbeta	FBgn0025352	CG4581	14	14	14	27.9649	28.0359	27.6407	27.8805	27.8786	27.6202	0	18.4996	9.38089	0.367911
262	sp|A8DYP0|OBSCN_DROME	A8DYP0	Unc-89	FBgn0053519	CG33519	59	59	59	27.2219	27.6013	27.5699	27.4643	27.2718	26.9991	0	18.0903	9.37407	0.358626
263	sp|Q9VHP0|DDX3_DROME	Q9VHP0	bel	FBgn0263231	CG9748	15	14	14	27.114	26.3366	25.4309	26.2938	25.367	25.4115	0	16.9262	9.36766	0.331129
264	sp|P52034|PFKA_DROME	P52034	Pfk	FBgn0003071	CG4001	16	16	16	27.5323	28.0673	26.8753	27.4916	27.0989	27.2791	0	18.126	9.3656	0.360122
265	sp|P80455|RS12_DROME	P80455	RpS12	FBgn0286213	CG11271	5	5	5	26.4189	26.795	25.2864	26.1668	25.1795	25.232	0	16.8038	9.36294	0.328174
266	sp|Q95029|CATL_DROME	Q95029	Cp1	FBgn0013770	CG6692	11	11	11	27.7624	27.6877	27.1788	27.543	27.3825	27.1681	0	18.1835	9.35944	0.361543
267	tr|Q9VQL7|Q9VQL7_DROME	Q9VQL7	FASN1	FBgn0283427	CG3523	21	21	21	25.9922	26.7173	25.5439	26.0845	25.4432	24.7644	0	16.7359	9.34861	0.326954
268	sp|Q9GU68|IF5A_DROME	Q9GU68	eEF5	FBgn0285952	CG3186	8	8	8	27.9853	27.6777	27.3232	27.6621	27.5043	27.4626	0	18.3223	9.33979	0.365705
269	tr|Q9W547|Q9W547_DROME	Q9W547	mRpL16	FBgn0023519	CG3109	10	10	10	27.1178	26.8269	26.1837	26.7095	26.5313	25.6029	0	17.3781	9.33139	0.343741
270	sp|P41094|RS18_DROME	P41094	RpS18	FBgn0010411	CG8900	5	5	5	27.1888	27.6148	26.9554	27.253	26.9385	26.8424	0	17.927	9.32601	0.356988
271	sp|P41572|6PGD_DROME	P41572	Pgd	FBgn0004654	CG3724	10	10	10	26.7552	27.165	25.6667	26.5289	25.8839	25.7266	0	17.2035	9.32545	0.339863
272	sp|Q24400|MLP2_DROME	Q24400	Mlp84B	FBgn0014863	CG1019	13	13	12	27.238	27.8042	26.9101	27.3174	27.1028	26.9187	0	18.0072	9.31027	0.359713
273	sp|P10676|NINAC_DROME	P10676	ninaC	FBgn0002938	CG5125	33	33	3	27.3235	27.9618	27.3604	27.5486	27.632	27.2243	0	18.2854	9.26314	0.368429
274	tr|Q8MST5|Q8MST5_DROME	Q8MST5	betaTub97EF	FBgn0003890	CG4869	18	11	11	27.1134	27.2391	26.2742	26.8756	26.4723	26.4699	0	17.6474	9.22815	0.354923
275	tr|Q9V3U6|Q9V3U6_DROME	Q9V3U6	26-29-p	FBgn0250848	CG8947	7	7	7	27.027	27.1095	26.6242	26.9202	26.4338	26.6862	0	17.7067	9.21355	0.356862
276	sp|P04359|RL32_DROME	P04359	RpL32	FBgn0002626	CG7939	5	5	5	27.7933	25.7689	0	17.8541	0	0	25.9277	8.64256	9.21149	0.500087
277	tr|Q9V455|Q9V455_DROME	Q9V455	Kap-alpha3	FBgn0027338	CG9423	7	7	7	26.0839	26.2634	25.447	25.9314	25.3023	24.909	0	16.7371	9.19434	0.333822
278	sp|P25171|RCC1_DROME	P25171	Rcc1	FBgn0002638	CG10480	14	14	14	26.5182	26.3818	0	17.6333	25.3175	0	0	8.43916	9.19417	0.493164
279	tr|A1Z892|A1Z892_DROME	A1Z892	Prx6b	FBgn0033520	CG12405	8	8	8	26.9051	27.1464	26.6861	26.9125	26.6118	26.55	0	17.7206	9.19191	0.358181
280	sp|Q9W0S7|SND1_DROME	Q9W0S7	Tudor-SN	FBgn0035121	CG7008	26	26	26	27.4398	27.4361	27.3209	27.3989	27.3774	27.3079	0	18.2284	9.17048	0.371264
281	tr|Q9VJ19|Q9VJ19_DROME	Q9VJ19	RpL30	FBgn0086710	CG10652	5	5	5	26.2703	27.5782	27.0858	26.9781	27.0689	26.3563	0	17.8084	9.16969	0.361797
282	tr|Q7KN75|Q7KN75_DROME	Q7KN75	Dp1	FBgn0027835	CG5170	29	29	29	27.1963	27.1304	27.1187	27.1485	27.1376	26.8229	0	17.9868	9.16163	0.365969
283	sp|P53501|ACT3_DROME	P53501	Act57B	FBgn0000044	CG10067	17	2	2	27.6874	0	28.5993	18.7622	0	28.8081	0	9.6027	9.15953	0.532588
284	tr|Q500Y7|Q500Y7_DROME	Q500Y7	UQCR-6.4	FBgn0034245	CG14482	3	3	3	26.6224	27.1675	26.6217	26.8039	26.1382	26.843	0	17.6604	9.14347	0.359143
285	tr|A0A6M3Q7Q7|A0A6M3Q7Q7_DROME	A0A6M3Q7Q7	hts	FBgn0263391	CG43443	12	12	12	25.664	26.4197	26.1804	26.088	25.1096	25.7943	0	16.968	9.12004	0.343172
286	tr|Q8T6I0|Q8T6I0_DROME	Q8T6I0	Past1	FBgn0016693	CG6148	17	17	17	26.1002	26.5605	25.5317	26.0642	25.5023	25.3552	0	16.9525	9.11165	0.34318
287	tr|A0A0B4K6U6|A0A0B4K6U6_DROME	A0A0B4K6U6	sqd	FBgn0263396	CG16901	6	6	6	26.6122	26.3554	26.2286	26.3987	26.126	25.8666	0	17.3309	9.06788	0.354474
288	tr|Q7KSQ0|Q7KSQ0_DROME	Q7KSQ0	sea	FBgn0037912	CG6782	9	9	9	26.8134	27.1776	26.3268	26.7726	26.5818	26.5774	0	17.7197	9.05284	0.364818
289	tr|Q9VM18|Q9VM18_DROME	Q9VM18	21430192	FBgn0031908	CG5177	12	12	12	27.0494	27.3173	26.3363	26.901	26.7496	26.8351	0	17.8616	9.03943	0.368942
290	tr|A4V303|A4V303_DROME	A4V303	CCT3	FBgn0015019	CG8977	12	12	12	26.3319	26.0978	25.5696	25.9998	25.4646	25.4608	0	16.9751	9.02466	0.347736
291	tr|Q9I7M3|Q9I7M3_DROME	Q9I7M3	Dmel\CG10237	FBgn0032783	CG10237	8	8	8	25.9076	26.3639	24.5718	25.6145	25.1521	24.6433	0	16.5985	9.016	0.339364
292	tr|A0A0B4LFL2|A0A0B4LFL2_DROME	A0A0B4LFL2	eIF3c	FBgn0034258	CG4954	13	13	13	26.4472	26.652	26.159	26.4194	26.1124	26.1139	0	17.4088	9.01061	0.359119
293	sp|Q9VU68|WDR1_DROME	Q9VU68	flr	FBgn0260049	CG10724	19	19	19	26.8439	27.2464	26.8163	26.9689	27.147	26.7403	0	17.9624	9.00643	0.372785
294	tr|Q9W1N3|Q9W1N3_DROME	Q9W1N3	levy	FBgn0034877	CG17280	3	3	3	27.1124	26.9101	26.5015	26.8413	26.4665	27.0472	0	17.8379	9.00345	0.370015
295	tr|M9PBR2|M9PBR2_DROME	M9PBR2	sif	FBgn0085447	CG34418	11	11	11	0	21.8191	26.6291	16.1494	21.4547	0	0	7.15156	8.99782	0.454536
296	tr|A0A0B4KHW3|A0A0B4KHW3_DROME	A0A0B4KHW3	aralar1	FBgn0028646	CG2139	15	15	15	25.9575	26.2144	25.4523	25.8747	25.5046	25.1374	0	16.8807	8.99404	0.346836
297	tr|Q9VXQ5|Q9VXQ5_DROME	Q9VXQ5	CCT6	FBgn0027329	CG8231	10	10	10	25.9543	26.4062	25.3064	25.8889	25.4108	25.3295	0	16.9134	8.97551	0.34867
298	tr|Q9VLB7|Q9VLB7_DROME	Q9VLB7	Gdi	FBgn0004868	CG4422	16	16	16	26.722	26.8889	25.7494	26.4534	26.2173	26.2973	0	17.5048	8.94858	0.364742
299	tr|Q9W2X6|Q9W2X6_DROME	Q9W2X6	ATPsyndelta	FBgn0028342	CG2968	3	3	3	26.259	27.2502	26.7358	26.7484	26.7718	26.6623	0	17.8114	8.93699	0.372619
300	sp|Q9VWI0|NDUS4_DROME	Q9VWI0	ND-18	FBgn0031021	CG12203	3	3	3	26.1876	26.8916	26.4423	26.5071	26.551	26.1871	0	17.5794	8.92778	0.367357
301	tr|Q59E30|Q59E30_DROME	Q59E30	fax	FBgn0014163	CG4609	8	8	8	25.3629	25.309	0	16.8906	0	23.9226	0	7.97421	8.91643	0.485499
302	tr|X2JEM4|X2JEM4_DROME	X2JEM4	RpS28b	FBgn0030136	CG2998	2	2	2	25.6757	25.975	0	17.2169	24.9691	0	0	8.32303	8.89388	0.498888
303	tr|A0A0B4LHL7|A0A0B4LHL7_DROME	A0A0B4LHL7	ATPsynD	FBgn0016120	CG6030	11	11	11	27.3148	27.5355	27.8351	27.5618	27.8539	28.1675	0	18.6738	8.88802	0.395117
304	tr|M9NEU5|M9NEU5_DROME	M9NEU5	chic	FBgn0000308	CG9553	4	4	4	26.3027	25.9514	26.7175	26.3239	26.1757	26.1488	0	17.4415	8.88234	0.366158
305	sp|Q9VWG3|RS10B_DROME	Q9VWG3	RpS10b	FBgn0285947	CG14206	4	4	4	26.0032	26.3157	24.7331	25.684	25.2847	25.2082	0	16.831	8.85307	0.352862
306	tr|X2J8V5|X2J8V5_DROME	X2J8V5	Arr1	FBgn0000120	CG5711	11	11	11	26.2354	26.426	25.9566	26.206	26.091	25.9766	0	17.3559	8.85012	0.365523
307	tr|Q9VMI3|Q9VMI3_DROME	Q9VMI3	ND-51	FBgn0031771	CG9140	8	8	8	25.7634	25.9351	25.3696	25.6893	25.3599	25.2064	0	16.8554	8.83392	0.353794
308	tr|A0A0B4KFX5|A0A0B4KFX5_DROME	A0A0B4KFX5	CtBP	FBgn0020496	CG7583	7	7	7	24.4941	25.2662	25.6078	25.1227	24.2965	24.6088	0	16.3018	8.82092	0.340417
309	tr|Q7KMP8|Q7KMP8_DROME	Q7KMP8	Rpn9	FBgn0028691	CG10230	10	10	10	25.2796	25.7514	0	17.0103	24.5889	0	0	8.19631	8.814	0.497037
310	tr|Q960M4|Q960M4_DROME	Q960M4	Prx5	FBgn0038570	CG7217	3	3	3	26.1518	26.8087	26.7763	26.5789	26.5287	26.8051	0	17.7779	8.80099	0.378313
311	tr|Q9VB10|Q9VB10_DROME	Q9VB10	Hsdl2	FBgn0039537	CG5590	8	8	8	26.5892	25.9088	25.7274	26.0751	25.822	26.0762	0	17.2994	8.77575	0.367902
312	tr|A0A0B4LGS4|A0A0B4LGS4_DROME	A0A0B4LGS4	Vha26	FBgn0283535	CG1088	6	6	6	25.1647	26.1135	25.6526	25.6436	25.1461	25.4601	0	16.8687	8.77488	0.357167
313	tr|M9PG76|M9PG76_DROME	M9PG76	RpLP0	FBgn0000100	CG7490	9	9	9	25.2922	26.2388	25.5526	25.6945	24.9049	25.8565	0	16.9205	8.77407	0.358733
314	tr|Q9VY87|Q9VY87_DROME	Q9VY87	CtsB	FBgn0030521	CG10992	6	6	6	25.8267	26.1285	25.6958	25.8837	25.88	25.4773	0	17.1191	8.76457	0.363828
315	tr|A0A0B4K7G4|A0A0B4K7G4_DROME	A0A0B4K7G4	mod	FBgn0002780	CG2050	13	13	13	26.2142	26.3092	26.5279	26.3504	26.4292	26.3414	0	17.5902	8.76023	0.375632
316	tr|X2JDI1|X2JDI1_DROME	X2JDI1	mts	FBgn0004177	CG7109	8	8	7	25.7492	25.86	25.4461	25.6851	25.2708	25.5284	0	16.9331	8.75203	0.35973
317	tr|Q9VVL7|Q9VVL7_DROME	Q9VVL7	E3	FBgn0036762	CG7430	10	10	10	25.9681	26.9671	26.0973	26.3441	26.1708	26.6122	0	17.5943	8.74979	0.376537
318	tr|Q9W3N9|Q9W3N9_DROME	Q9W3N9	Acat1	FBgn0029969	CG10932	5	5	5	25.4747	25.9459	25.2681	25.5629	25.3045	25.1368	0	16.8137	8.74916	0.356904
319	tr|L0MPS3|L0MPS3_DROME	L0MPS3	apolpp	FBgn0087002	CG11064	20	20	20	26.9647	26.7549	27.649	27.1229	27.563	27.5761	0	18.3797	8.74318	0.395463
320	tr|Q7K3J0|Q7K3J0_DROME	Q7K3J0	CCT8	FBgn0284436	CG8258	16	16	16	26.5453	26.2351	27.5042	26.7615	26.9888	27.0779	0	18.0222	8.73928	0.387435
321	sp|P29829|GBB2_DROME	P29829	Gbeta76C	FBgn0004623	CG8770	10	10	10	26.098	26.2736	25.5662	25.9793	25.9584	25.7655	0	17.2413	8.73797	0.368237
322	tr|Q9VW68|Q9VW68_DROME	Q9VW68	Gabat	FBgn0036927	CG7433	9	9	9	25.3401	25.6113	25.4909	25.4807	25.1912	25.1145	0	16.7686	8.71218	0.357457
323	sp|Q9VTP4|R10AB_DROME	Q9VTP4	RpL10Ab	FBgn0036213	CG7283	5	5	5	26.2487	25.1828	25.7694	25.7336	25.7143	25.3631	0	17.0258	8.70786	0.364492
324	tr|Q7KVX5|Q7KVX5_DROME	Q7KVX5	Vap33	FBgn0029687	CG5014	5	5	5	25.0158	25.0349	25.7639	25.2715	24.7941	24.9074	0	16.5672	8.70437	0.352835
325	tr|A0A0B4LFD2|A0A0B4LFD2_DROME	A0A0B4LFD2	Hsc70-5	FBgn0001220	CG8542	15	15	15	26.3643	26.5109	26.3142	26.3965	26.5243	26.5829	0	17.7024	8.69411	0.381599
326	sp|Q24208|IF2G_DROME	Q24208	eIF2gamma	FBgn0263740	CG43665	13	13	13	25.7664	25.9919	25.6425	25.8003	25.7176	25.6458	0	17.1211	8.67913	0.368028
327	sp|Q24439|ATPO_DROME	Q24439	ATPsynO	FBgn0016691	CG4307	10	10	10	26.469	26.1017	26.1322	26.2343	26.2605	26.438	0	17.5662	8.66811	0.379604
328	tr|Q9V470|Q9V470_DROME	Q9V470	ScsbetaG	FBgn0029118	CG10622	8	8	8	25.6026	26.1544	25.7937	25.8502	25.9279	25.6667	0	17.1982	8.65199	0.371361
329	tr|Q9W3N1|Q9W3N1_DROME	Q9W3N1	spidey	FBgn0029975	CG1444	6	6	6	25.8016	25.7768	25.6451	25.7412	25.533	25.8136	0	17.1155	8.62561	0.370538
330	tr|Q9W392|Q9W392_DROME	Q9W392	CCT2	FBgn0030086	CG7033	10	10	10	24.9123	25.6684	24.942	25.1742	24.7548	24.9234	0	16.5594	8.61485	0.357071
331	tr|Q9V3V6|Q9V3V6_DROME	Q9V3V6	Rpt5	FBgn0028684	CG10370	8	8	7	25.1588	25.6037	24.8846	25.2157	25.1055	24.7312	0	16.6123	8.60343	0.35898
332	tr|A0A0B4LFL3|A0A0B4LFL3_DROME	A0A0B4LFL3	eEF1beta	FBgn0028737	CG6341	8	8	8	26.6514	26.0221	24.4578	25.7104	25.68	25.6431	0	17.1077	8.60273	0.372699
333	tr|E2QCF1|E2QCF1_DROME	E2QCF1	ATPCL	FBgn0020236	CG8322	22	22	22	25.1561	25.2426	26.6536	25.6841	25.7727	25.5254	0	17.0994	8.58475	0.372849
334	tr|A4V3W2|A4V3W2_DROME	A4V3W2	sgg	FBgn0003371	CG2621	7	7	7	24.6158	24.6539	24.0004	24.4234	23.8289	23.7038	0	15.8442	8.57914	0.33991
335	tr|Q9VQ29|Q9VQ29_DROME	Q9VQ29	RFeSP	FBgn0021906	CG7361	7	7	7	27.2841	26.7544	27.5833	27.2073	28.3628	27.553	0	18.6386	8.56868	0.410165
336	tr|A0A0B4KI24|A0A0B4KI24_DROME	A0A0B4KI24	Nlp	FBgn0016685	CG7917	3	3	3	24.8436	25.3629	25.0937	25.1001	24.6875	24.9079	0	16.5318	8.56826	0.358566
337	tr|A0A0C4DHE8|A0A0C4DHE8_DROME	A0A0C4DHE8	RpS29	FBgn0261599	CG8495	3	3	3	26.1822	25.3832	25.3374	25.6342	25.5576	25.6768	0	17.0781	8.55609	0.373271
338	tr|Q966T5|Q966T5_DROME	Q966T5	Pax	FBgn0041789	CG31794	4	4	4	24.8968	25.1094	25.1377	25.048	24.8447	24.693	0	16.5126	8.53543	0.359654
339	tr|Q9W5W8|Q9W5W8_DROME	Q9W5W8	Ech1	FBgn0031092	CG9577	7	7	7	25.6729	24.7929	24.8914	25.1191	24.6789	25.0855	0	16.5881	8.53093	0.3621
340	tr|Q7KLX3|Q7KLX3_DROME	Q7KLX3	Tapdelta	FBgn0021795	CG9035	3	3	3	24.863	25.5121	0	16.7917	0	24.7905	0	8.2635	8.52821	0.509228
341	tr|A4V391|A4V391_DROME	A4V391	CCT1	FBgn0003676	CG5374	11	11	11	24.6656	25.76	25.5131	25.3129	25.3127	25.0421	0	16.7849	8.52797	0.367378
342	tr|X2JC35|X2JC35_DROME	X2JC35	RpL36	FBgn0002579	CG7622	5	5	5	24.9975	24.6961	0	16.5645	0	24.1422	0	8.0474	8.51715	0.50173
343	tr|A1Z8U4|A1Z8U4_DROME	A1Z8U4	CCT5	FBgn0010621	CG8439	9	9	9	24.8355	25.5133	25.0224	25.1237	24.7116	25.1245	0	16.612	8.51172	0.36357
344	tr|E2QCS7|E2QCS7_DROME	E2QCS7	Dmel\CG17097	FBgn0265264	CG17097	12	12	12	25.9595	26.581	27.5089	26.6832	27.2503	27.2662	0	18.1722	8.511	0.402466
345	tr|Q9VB46|Q9VB46_DROME	Q9VB46	Hmu	FBgn0015737	CG3373	6	6	6	24.2957	24.6765	24.6665	24.5462	24.128	23.9783	0	16.0354	8.5108	0.348362
346	tr|Q9VRP3|Q9VRP3_DROME	Q9VRP3	Txl	FBgn0035631	CG5495	6	6	6	25.526	26.1941	26.3302	26.0168	26.3298	26.1922	0	17.5073	8.50943	0.386225
347	sp|Q9VKD3|NFS1_DROME	Q9VKD3	Nfs1	FBgn0032393	CG12264	6	6	6	25.1021	25.2468	24.368	24.9056	24.7143	24.4872	0	16.4005	8.50513	0.358484
348	tr|Q9VAY2|Q9VAY2_DROME	Q9VAY2	Gp93	FBgn0039562	CG5520	15	15	15	25.4158	25.6093	25.2518	25.4256	25.3922	25.3828	0	16.925	8.50062	0.372004
349	tr|M9NE68|M9NE68_DROME	M9NE68	Hsp23	FBgn0001224	CG4463	4	4	4	24.7464	0	25.5688	16.7718	0	24.8413	0	8.28045	8.49131	0.51115
350	tr|Q7JS69|Q7JS69_DROME	Q7JS69	nrv3	FBgn0032946	CG8663	4	4	4	24.4857	24.2255	25.0395	24.5836	24.2963	23.9927	0	16.0963	8.48729	0.351326
351	sp|Q27268|DX39B_DROME	Q27268	Hel25E	FBgn0014189	CG7269	8	8	8	24.8467	25.4485	24.6891	24.9948	24.7394	24.812	0	16.5171	8.47763	0.362833
352	tr|X2JFR6|X2JFR6_DROME	X2JFR6	eIF2alpha	FBgn0261609	CG9946	8	8	8	25.3697	25.9963	25.0925	25.4861	25.2309	25.9092	0	17.0467	8.43944	0.378472
353	sp|Q9VN93|CPR1_DROME	Q9VN93	CG12163	FBgn0260462	CG12163	6	6	6	24.5991	25.2928	25.7447	25.2122	25.2688	25.0544	0	16.7744	8.43779	0.37167
354	tr|L0MNA8|L0MNA8_DROME	L0MNA8	Arf4	FBgn0013749	CG11027	4	4	3	23.9607	24.5868	0	16.1825	0	0	23.2974	7.7658	8.41669	0.49475
355	tr|A4V3Q6|A4V3Q6_DROME	A4V3Q6	eEF1alpha2	FBgn0000557	CG1873	14	5	5	25.4135	0	25.8589	17.0908	26.036	0	0	8.67868	8.41214	0.527781
356	sp|P16378|GNAO_DROME	P16378	Galphao	FBgn0001122	CG2204	6	6	5	24.9709	25.4703	25.2145	25.2186	25.5048	24.9211	0	16.8086	8.40996	0.373761
357	sp|P54397|FKB39_DROME	P54397	Fkbp39	FBgn0013269	CG6226	10	10	10	26.0031	26.0528	26.8338	26.2966	26.4863	27.1951	0	17.8938	8.40276	0.401117
358	tr|Q9VPL0|Q9VPL0_DROME	Q9VPL0	Dmel\CG3436	FBgn0031229	CG3436	8	8	8	25.1126	25.0306	24.4551	24.8661	24.6713	24.7247	0	16.4653	8.40074	0.365362
359	sp|O02195|EIF3I_DROME	O02195	eIF3i	FBgn0015834	CG8882	8	8	8	25.0935	24.7296	25.404	25.0757	25.1141	24.9265	0	16.6802	8.39549	0.371185
360	tr|Q9VRZ1|Q9VRZ1_DROME	Q9VRZ1	Prat2	FBgn0041194	CG10078	7	7	7	24.7461	24.6729	24.9277	24.7822	24.8662	24.3171	0	16.3944	8.38781	0.364133
361	tr|Q7K485|Q7K485_DROME	Q7K485	cathD	FBgn0029093	CG1548	7	7	7	25.0435	25.6741	25.2939	25.3372	25.5733	25.2785	0	16.9506	8.38658	0.378541
362	tr|A0A0B4KHL7|A0A0B4KHL7_DROME	A0A0B4KHL7	Mitofilin	FBgn0019960	CG6455	11	11	11	24.9703	25.563	25.4502	25.3278	25.1637	25.6759	0	16.9465	8.38129	0.378751
363	tr|O18333|O18333_DROME	O18333	Rab2	FBgn0014009	CG3269	6	6	6	24.8512	25.5562	25.2265	25.2113	25.2541	25.2573	0	16.8371	8.37417	0.376296
364	tr|A0A0B4KHT5|A0A0B4KHT5_DROME	A0A0B4KHT5	Syp	FBgn0038826	CG17838	11	11	2	24.681	24.8152	24.9442	24.8135	24.7318	24.5889	0	16.4402	8.37323	0.366002
365	tr|A4V133|A4V133_DROME	A4V133	CaMKII	FBgn0264607	CG18069	14	14	14	25.7559	25.9267	27.5917	26.4248	27.0639	27.1856	0	18.0832	8.3416	0.409334
366	sp|Q94915|REG2_DROME	Q94915	Reg-2	FBgn0016715	CG3200	7	7	7	24.52	24.4884	0	16.3361	23.9965	0	0	7.99885	8.33728	0.506244
367	tr|Q9VXK7|Q9VXK7_DROME	Q9VXK7	ND-20	FBgn0030718	CG9172	4	4	2	25.0172	25.4775	24.9536	25.1494	25.1544	25.3007	0	16.8184	8.33104	0.377997
368	tr|Q9VQD7|Q9VQD7_DROME	Q9VQD7	ND-B17.2	FBgn0031436	CG3214	4	4	4	24.9405	24.8438	24.4672	24.7505	24.4128	24.8485	0	16.4204	8.33009	0.367795
369	tr|Q9VKT1|Q9VKT1_DROME	Q9VKT1	CG17093	FBgn0051872	CG31872	7	7	7	24.6648	25.4793	25.7459	25.2967	25.6146	25.3218	0	16.9788	8.31788	0.382999
370	tr|Q9VM19|Q9VM19_DROME	Q9VM19	Dmel\CG5171	FBgn0031907	CG5171	6	6	6	24.4192	24.2471	0	16.2221	0	23.7349	0	7.91163	8.31047	0.503956
371	tr|A1Z7H3|A1Z7H3_DROME	A1Z7H3	Acsl	FBgn0263120	CG8732	11	11	11	24.7195	24.5905	24.7552	24.6884	24.5602	24.5736	0	16.3779	8.31045	0.367587
372	tr|Q9VEY5|Q9VEY5_DROME	Q9VEY5	Mic26-27	FBgn0038400	CG5903	6	6	6	24.2716	25.3623	24.6235	24.7525	24.9073	24.4416	0	16.4496	8.30283	0.370232
373	sp|Q9V438|PDIA6_DROME	Q9V438	CaBP1	FBgn0025678	CG5809	4	4	4	24.447	25.2362	0	16.5611	24.8077	0	0	8.26925	8.29182	0.517786
374	tr|Q9VJL9|Q9VJL9_DROME	Q9VJL9	MET30	FBgn0028897	CG4935	9	9	9	24.3137	25.0024	25.7186	25.0116	24.923	25.2455	0	16.7229	8.28871	0.378182
375	tr|Q8SY69|Q8SY69_DROME	Q8SY69	RH61753p	FBgn0069923	CG41128	2	2	2	24.7149	0	24.5358	16.4169	24.385	0	0	8.12832	8.28856	0.512739
376	tr|Q9VX36|Q9VX36_DROME	Q9VX36	ND-24	FBgn0030853	CG5703	8	8	8	24.8144	25.0502	24.6082	24.8243	24.7355	24.8864	0	16.5406	8.28362	0.373268
377	tr|Q9VTV3|Q9VTV3_DROME	Q9VTV3	Ak1	FBgn0022709	CG17146	4	4	4	24.4802	25.4494	0	16.6432	25.0832	0	0	8.36106	8.28213	0.52144
378	tr|M9NFH8|M9NFH8_DROME	M9NFH8	GS	FBgn0036663	CG9674	10	10	10	0	24.1546	24.3725	16.1757	0	23.7089	0	7.90298	8.27271	0.504982
379	tr|X2JEF0|X2JEF0_DROME	X2JEF0	Zw	FBgn0004057	CG12529	8	8	8	24.4689	24.3155	24.2251	24.3365	23.9855	24.2593	0	16.0816	8.25493	0.362656
380	tr|Q7K3D4|Q7K3D4_DROME	Q7K3D4	zda	FBgn0034368	CG5482	8	8	8	24.9401	25.1562	25.427	25.1744	25.3082	25.4922	0	16.9334	8.241	0.385568
381	tr|A0A0B4KEJ7|A0A0B4KEJ7_DROME	A0A0B4KEJ7	coro	FBgn0265935	CG9446	7	7	7	24.3472	24.8619	0	16.403	0	24.5011	0	8.16704	8.23598	0.51606
382	sp|Q27597|NCPR_DROME	Q27597	Cpr	FBgn0015623	CG11567	10	10	10	24.9292	25.553	25.7157	25.3993	25.711	25.7868	0	17.1659	8.23337	0.391914
383	tr|M9PHG4|M9PHG4_DROME	M9PHG4	beta-Spec	FBgn0250788	CG5870	16	16	16	24.6152	25.2416	24.9871	24.9479	24.9427	25.2051	0	16.7159	8.23201	0.380539
384	tr|Q0KHZ6|Q0KHZ6_DROME	Q0KHZ6	Etfb	FBgn0039697	CG7834	10	10	10	25.233	25.6949	26.1759	25.7013	26.013	26.4213	0	17.4781	8.22316	0.400246
385	tr|Q95U34|Q95U34_DROME	Q95U34	Galk	FBgn0263199	CG5288	7	7	7	24.6403	23.9434	23.5556	24.0464	23.8039	23.7216	0	15.8418	8.20457	0.359146
386	tr|A0A0B4K6D2|A0A0B4K6D2_DROME	A0A0B4K6D2	p23	FBgn0037728	CG16817	5	5	5	25.4258	0	24.6302	16.6854	0	25.4487	0	8.48289	8.20247	0.52855
387	tr|Q9VXI6|Q9VXI6_DROME	Q9VXI6	UQCR-14	FBgn0030733	CG3560	3	3	3	24.7989	24.6592	0	16.486	0	24.856	0	8.28532	8.20073	0.521561
388	tr|M9MRX4|M9MRX4_DROME	M9MRX4	Ank2	FBgn0261788	CG42734	10	10	8	23.8741	0	24.9304	16.2682	0	24.2389	0	8.07962	8.18854	0.514691
389	sp|P61851|SODC_DROME	P61851	Sod1	FBgn0003462	CG11793	5	5	5	25.1223	25.2732	25.2458	25.2138	25.6211	25.5469	0	17.056	8.15775	0.392955
390	sp|P14318|MP20_DROME	P14318	Mp20	FBgn0002789	CG4696	5	5	5	24.1842	25.2387	24.7697	24.7309	24.8673	24.9147	0	16.594	8.13688	0.382557
391	tr|Q9W3C3|Q9W3C3_DROME	Q9W3C3	Dmel\CG2004	FBgn0030060	CG2004	4	4	4	24.7248	24.3231	24.1096	24.3859	24.458	24.2959	0	16.2513	8.13458	0.373541
392	tr|Q1RL12|Q1RL12_DROME	Q1RL12	nrv2	FBgn0015777	CG9261	6	6	6	24.4544	0	24.0671	16.1738	0	24.1298	0	8.04328	8.13055	0.51534
393	tr|E1JIS4|E1JIS4_DROME	E1JIS4	Dmel\CG34034	FBgn0054034	CG34034	2	2	2	23.7242	24.561	0	16.0951	0	23.9146	0	7.97154	8.12353	0.513013
394	sp|P48148|RHO1_DROME	P48148	Rho1	FBgn0014020	CG8416	6	6	6	24.1851	24.6628	23.869	24.239	24.1823	24.1861	0	16.1228	8.11616	0.37117
395	tr|O18332|O18332_DROME	O18332	Rab1	FBgn0285937	CG3320	6	6	6	0	24.2908	24.5548	16.2819	24.5122	0	0	8.17073	8.11115	0.520696
396	tr|A0A0B4LGY0|A0A0B4LGY0_DROME	A0A0B4LGY0	Unc-115a	FBgn0051352	CG31352	10	10	10	24.5086	25.208	24.5932	24.7699	25.0515	24.9391	0	16.6636	8.10639	0.385826
397	tr|Q7KV27|Q7KV27_DROME	Q7KV27	ALT	FBgn0030478	CG1640	10	10	10	25.2737	25.0589	25.9166	25.4164	26.1249	25.8318	0	17.3189	8.09745	0.402886
398	sp|Q9VF27|NDUS8_DROME	Q9VF27	ND-23	FBgn0017567	CG3944	5	5	5	23.7996	24.3753	0	16.0583	0	23.9474	0	7.98245	8.07584	0.515115
399	tr|Q7K8X7|Q7K8X7_DROME	Q7K8X7	GstE9	FBgn0063491	CG17534	2	2	2	23.447	23.9404	23.2992	23.5622	23.1692	23.3377	0	15.5023	8.05988	0.357282
400	tr|M9NE01|M9NE01_DROME	M9NE01	Pp2B-14D	FBgn0011826	CG9842	6	6	5	24.0335	24.1668	24.1095	24.1033	23.8868	24.2844	0	16.0571	8.0462	0.373006
401	sp|P13395|SPTCA_DROME	P13395	alpha-Spec	FBgn0250789	CG1977	14	14	14	24.0623	24.1152	24.7069	24.2948	24.7977	24.2738	0	16.3572	7.93764	0.386947
402	tr|Q9VY92|Q9VY92_DROME	Q9VY92	Dmel\CG11151	FBgn0030519	CG11151	4	4	4	24.2193	0	24.328	16.1824	0	24.7355	0	8.24516	7.93729	0.529792
403	tr|Q9VVZ4|Q9VVZ4_DROME	Q9VVZ4	Dmel\CG14095	FBgn0036870	CG14095	3	3	3	23.2052	0	24.611	15.9387	24.1185	0	0	8.03949	7.89923	0.523985
404	tr|Q9VRL0|Q9VRL0_DROME	Q9VRL0	Cyt-c1	FBgn0035600	CG4769	5	5	5	25.173	25.5464	24.7604	25.1599	0	25.8933	25.8999	17.2644	7.89553	0.412266
405	tr|M9NDP1|M9NDP1_DROME	M9NDP1	ctp	FBgn0011760	CG6998	3	3	3	24.4568	0	24.844	16.4336	0	25.6215	0	8.54051	7.8931	0.541868
406	tr|Q7K3S2|Q7K3S2_DROME	Q7K3S2	Nt5c	FBgn0033426	CG1814	4	4	4	23.689	23.3664	0	15.6851	0	23.5291	0	7.84303	7.84211	0.518568
407	tr|Q9VQM2|Q9VQM2_DROME	Q9VQM2	ND-B14.5B	FBgn0031505	CG12400	3	3	3	23.6137	23.9951	0	15.8696	24.137	0	0	8.04568	7.82391	0.526818
408	tr|Q9VV46|Q9VV46_DROME	Q9VV46	Cpr72Ec	FBgn0036619	CG4784	8	8	8	25.4366	24.73	25.9062	25.3576	26.765	26.0597	0	17.6082	7.74937	0.428891
409	tr|Q9VQR2|Q9VQR2_DROME	Q9VQR2	ND-PDSW	FBgn0021967	CG8844	6	6	6	23.503	0	24.2593	15.9208	0	24.7848	0	8.26159	7.65919	0.540999
410	tr|M9PH85|M9PH85_DROME	M9PH85	BcDNA:LD28247	FBgn0027498	CG2061	5	5	5	23.8893	24	23.9116	23.9336	24.7515	24.1416	0	16.2977	7.63589	0.401888
411	sp|Q9U616|GCSH_DROME	Q9U616	ppl	FBgn0027945	CG7758	2	2	2	23.0256	22.9564	0	15.3273	0	23.4136	0	7.80455	7.52277	0.529412
412	sp|Q9VN91|MORN4_DROME	Q9VN91	rtp	FBgn0087005	CG10233	3	3	3	24.3159	23.2747	24.5906	24.0604	25.1209	24.6744	0	16.5984	7.46197	0.41997
413	sp|Q8MT06|GNL3_DROME	Q8MT06	Ns1	FBgn0038473	CG3983	23	23	23	31.0684	31.0084	25.753	29.2766	25.4017	25.996	24.7861	25.3946	3.88197	0.0967556
414	tr|A0A0B4K6N1|A0A0B4K6N1_DROME	A0A0B4K6N1	RpS8	FBgn0039713	CG7808	18	18	18	35.2226	35.5739	30.6294	33.8086	30.5564	30.3929	29.9695	30.3063	3.50234	0.094146
415	tr|Q9V9W2|Q9V9W2_DROME	Q9V9W2	RpL6	FBgn0039857	CG11522	17	17	17	33.9653	33.8008	29.0256	32.2639	28.9379	28.4238	29.3568	28.9062	3.35775	0.11035
416	sp|O16797|RL3_DROME	O16797	RpL3	FBgn0020910	CG4863	30	30	30	33.2902	33.0211	29.0377	31.783	29.2414	29.1313	27.5947	28.6558	3.12719	0.101165
417	tr|Q9VDK7|Q9VDK7_DROME	Q9VDK7	Srp72	FBgn0038810	CG5434	23	23	23	29.2407	28.6077	24.6727	27.507	25.3566	24.1728	24.1563	24.5619	2.94514	0.118023
418	tr|Q9VXK5|Q9VXK5_DROME	Q9VXK5	dSpb1	FBgn0030720	CG8939	26	26	26	30.4621	30.1306	26.4127	29.0018	26.0051	26.1913	26.2054	26.1339	2.86785	0.0919779
419	tr|Q9W0A8|Q9W0A8_DROME	Q9W0A8	RpL23A	FBgn0026372	CG7977	10	10	10	32.5735	31.7885	27.471	30.611	27.2996	27.553	28.4954	27.7826	2.82838	0.157219
420	sp|P29327|RS6_DROME	P29327	RpS6	FBgn0261592	CG10944	10	10	10	33.1022	32.9006	29.138	31.7136	29.3798	29.1069	29.2413	29.2427	2.47095	0.128268
421	sp|P09180|RL4_DROME	P09180	RpL4	FBgn0003279	CG5502	25	25	25	33.0026	33.3312	29.5763	31.9701	29.4528	29.6284	29.4745	29.5186	2.45149	0.110981
422	tr|X2JE06|X2JE06_DROME	X2JE06	RpL24	FBgn0032518	CG9282	8	8	8	31.7976	32.2488	28.9165	30.9876	28.7065	28.624	28.4247	28.585	2.40258	0.0834373
423	tr|M9MRC9|M9MRC9_DROME	M9MRC9	RpL27A	FBgn0285948	CG15442	6	6	6	31.7396	31.9531	27.9768	30.5565	27.8398	28.4908	28.256	28.1955	2.36096	0.144751
424	tr|Q9VHE5|Q9VHE5_DROME	Q9VHE5	RpL34b	FBgn0037686	CG9354	6	6	2	33.5559	33.2629	29.4565	32.0918	29.3674	29.5078	30.3185	29.7312	2.36053	0.156035
425	tr|Q9W229|Q9W229_DROME	Q9W229	RpS24	FBgn0261596	CG3751	6	6	6	30.2894	30.0789	27.4912	29.2865	26.9248	26.892	27.3301	27.049	2.23753	0.0699162
426	tr|X2JIQ5|X2JIQ5_DROME	X2JIQ5	RpL17	FBgn0029897	CG3203	5	5	5	30.6563	29.9675	28.3799	29.6679	28.307	27.5841	27.5842	27.8251	1.84276	0.0616796
427	tr|M9ND19|M9ND19_DROME	M9ND19	Gale	FBgn0035147	CG12030	13	13	13	27.5983	27.8051	26.9604	27.4546	26.9434	26.3356	24.0995	25.7928	1.66176	0.138976
428	tr|Q9Y119|Q9Y119_DROME	Q9Y119	Tps1	FBgn0027560	CG4104	29	29	29	29.115	28.9224	28.1351	28.7242	28.2663	27.6274	25.4901	27.1279	1.59623	0.147803
429	tr|Q9VN21|Q9VN21_DROME	Q9VN21	lost	FBgn0263594	CG14648	23	23	23	30.7395	30.1349	28.1957	29.69	28.1323	28.0838	28.0833	28.0998	1.59022	0.106979
430	tr|A0A0B4LGZ5|A0A0B4LGZ5_DROME	A0A0B4LGZ5	RpL11	FBgn0013325	CG7726	4	4	4	29.6081	30.0048	28.0413	29.2181	28.3127	27.9235	26.9915	27.7426	1.47551	0.108431
431	tr|A0A0B4LFD9|A0A0B4LFD9_DROME	A0A0B4LFD9	RpS23	FBgn0033912	CG8415	8	8	8	30.8777	29.7101	28.6897	29.7592	28.6161	28.5894	27.974	28.3932	1.36598	0.109552
432	tr|M9PET0|M9PET0_DROME	M9PET0	Gpdh1	FBgn0001128	CG9042	21	21	21	30.9014	31.3729	29.3834	30.5526	29.3853	29.5262	28.8196	29.2437	1.30887	0.109452
433	sp|P17704|RS17_DROME	P17704	RpS17	FBgn0005533	CG3922	5	5	5	27.6162	27.8298	26.3531	27.2664	26.3547	26.3198	25.2168	25.9638	1.30262	0.0930804
434	tr|M9PFK6|M9PFK6_DROME	M9PFK6	Fbp1	FBgn0000639	CG17285	30	30	30	29.3793	27.7667	27.3739	28.1733	26.4822	25.7213	28.4293	26.8776	1.29573	0.270119
435	tr|M9PFF0|M9PFF0_DROME	M9PFF0	RpL13	FBgn0011272	CG4651	10	10	10	29.7639	29.8465	28.1676	29.2593	28.034	27.9317	28.111	28.0256	1.23377	0.0878435
436	tr|A0A023GQA5|A0A023GQA5_DROME	A0A023GQA5	Phb1	FBgn0002031	CG10691	17	17	17	28.4326	28.9561	28.1092	28.4993	28.2005	28.0959	25.5984	27.2983	1.20104	0.246517
437	sp|P55841|RL14_DROME	P55841	RpL14	FBgn0017579	CG6253	10	10	10	30.7746	30.5625	28.4832	29.9401	28.7029	28.6898	28.9963	28.7963	1.14378	0.19604
438	tr|E1JJ68|E1JJ68_DROME	E1JJ68	Rm62	FBgn0003261	CG10279	22	22	19	28.2281	28.4839	27.6424	28.1181	27.1555	27.392	26.3922	26.9799	1.13825	0.0436966
439	sp|P55935|RS9_DROME	P55935	RpS9	FBgn0010408	CG3395	10	10	10	28.6938	28.733	27.6355	28.3541	27.2871	27.5849	26.8856	27.2526	1.10151	0.0558377
440	tr|Q9VBN5|Q9VBN5_DROME	Q9VBN5	RpL27	FBgn0039359	CG4759	5	5	5	30.4614	30.232	27.9617	29.5517	28.5294	28.393	28.437	28.4531	1.09858	0.241018
441	sp|Q9VNE9|RL13A_DROME	Q9VNE9	RpL13A	FBgn0037351	CG1475	8	8	8	30.7675	31.0777	29.3605	30.4019	29.2702	29.0734	29.5763	29.3067	1.09521	0.116412
442	sp|Q27331|VATA2_DROME	Q27331	Vha68-2	FBgn0263598	CG3762	23	23	15	28.4436	28.6333	27.7636	28.2802	27.3993	27.8725	26.3206	27.1975	1.08269	0.110454
443	tr|A8JRB8|A8JRB8_DROME	A8JRB8	Idh3g	FBgn0039358	CG5028	15	15	15	29.7053	29.8166	29.191	29.571	29.2654	29.4949	26.7093	28.4898	1.08113	0.302054
444	tr|M9PHM6|M9PHM6_DROME	M9PHM6	RpL18	FBgn0035753	CG8615	8	8	8	30.8834	30.3705	28.3917	29.8819	28.5162	28.5065	29.4052	28.8093	1.07257	0.259012
445	sp|Q9V3G1|RL8_DROME	Q9V3G1	RpL8	FBgn0261602	CG1263	12	12	12	32.126	30.4878	28.614	30.4093	28.837	29.1862	30.0322	29.3518	1.05745	0.380915
446	tr|M9PBL3|M9PBL3_DROME	M9PBL3	Hsp83	FBgn0001233	CG1242	22	22	22	29.8315	29.7868	28.8726	29.497	29.0879	29.0802	27.1719	28.4466	1.05034	0.213058
447	sp|Q8T079|GLYR1_DROME	Q8T079	Ndf	FBgn0043456	CG4747	11	11	11	26.6245	25.5795	0	17.4013	24.5258	24.5424	0	16.3561	1.04527	0.934472
448	sp|P00408|COX2_DROME	P00408	mt:CoII	FBgn0013675	CG34069	5	5	5	29.3617	29.7658	28.1572	29.0949	28.2156	27.8675	28.1266	28.0699	1.02501	0.106797
449	tr|X2JCX8|X2JCX8_DROME	X2JCX8	RpS14b	FBgn0004404	CG1527	8	8	8	30.8929	31.2156	29.6351	30.5812	29.756	29.6415	29.2951	29.5642	1.01703	0.112555
482	sp|Q7KN62|TERA_DROME	Q7KN62	TER94	FBgn0286784	CG2331	11	11	11	25.1447	25.2723	25.2765	25.2312	24.4497	24.7241	24.6942	24.6227	0.608536	0.00330637
497	tr|F0JAN1|F0JAN1_DROME	F0JAN1	Paics	FBgn0020513	CG3989	11	11	11	26.5512	26.3403	26.1508	26.3475	25.8545	25.9356	25.8076	25.8659	0.481558	0.0166477
501	sp|P20432|GSTD1_DROME	P20432	GstD1	FBgn0001149	CG10045	7	7	7	27.1796	27.4692	27.0498	27.2328	26.8206	26.7738	26.71	26.7681	0.464721	0.0221658
493	tr|A0A0B4LG52|A0A0B4LG52_DROME	A0A0B4LG52	RpS16	FBgn0034743	CG4046	12	12	12	29.4499	29.6617	29.2308	29.4475	28.9803	29.0564	28.822	28.9529	0.494569	0.0254395
481	sp|Q9V8R9|EPB41_DROME	Q9V8R9	cora	FBgn0010434	CG11949	67	67	67	31.5822	31.8035	31.4076	31.5978	30.8505	30.7833	31.2884	30.9741	0.623689	0.033178
480	sp|P48610|KARG_DROME	P48610	Argk1	FBgn0000116	CG32031	21	21	21	30.5489	30.5663	30.2238	30.4463	29.884	30.076	29.5051	29.8217	0.624619	0.0361371
472	tr|Q7KUB0|Q7KUB0_DROME	Q7KUB0	Idh	FBgn0001248	CG7176	17	17	17	27.3981	27.5056	27.0646	27.3228	26.8491	26.717	26.1235	26.5632	0.759544	0.0430139
455	tr|Q9VXI1|Q9VXI1_DROME	Q9VXI1	Had1	FBgn0286508	CG9914	13	13	13	29.1487	29.3779	28.6173	29.0479	28.3449	28.3775	27.6297	28.1174	0.930555	0.0487068
