# Supplementary material for: Tissue-specific O-GlcNAcylation profiling identifies substrates in translational machinery in Drosophila mushroom body contributing to olfactory learning
Source: eLife. 2024 Apr 15;13:e91269. doi: 10.7554/eLife.91269 (PMC11018347; doi:10.7554/eLife.91269)
Supplement: Supplementary file 6. [file elife-91269-supp6.xlsx]

## Sheet: Sheet1
O-GlcNAcylated proteins identified by TurboID-CpOGA CD from antennal lobe of Drosophila
NO.	Majority protein IDs	UniProtKB	Gene Symbol	FlyBase ID	Annotation Symbol	Peptides	Razor + unique peptides	Unique peptides	Log2( LFQ intensity+1)
									AL TurboID-CpOGA CD				AL TurboID-CpOGA DM				Log2 Fold Change	P Value
									1	2	3	Average	1	2	3	Average
1	tr|Q8SY69|Q8SY69_DROME	Q8SY69	RH61753p	FBgn0069923	CG41128	2	2	2	24.7103	24.6821	24.8661	24.7528	0	0	0	0	24.7528	1.71367e-10
2	tr|Q7K304|Q7K304_DROME	Q7K304	Drep2	FBgn0028408	CG1975	8	8	8	24.0897	24.7152	24.6269	24.4773	0	0	0	0	24.4773	2.43903e-08
3	tr|E6PBV6|E6PBV6_DROME	E6PBV6	CG1354-RA	FBgn0030151	CG1354	6	6	6	24.4495	24.6873	24.1991	24.4453	0	0	0	0	24.4453	6.6301e-09
4	tr|Q8IRC2|Q8IRC2_DROME	Q8IRC2	anon-WO0140519.252	FBgn0035497	CG14995	7	7	7	24.4854	24.3572	24.2495	24.364	0	0	0	0	24.364	3.68067e-10
5	tr|X2JFR6|X2JFR6_DROME	X2JFR6	eIF2alpha	FBgn0261609	CG9946	7	7	7	24.3634	24.2669	24.2338	24.288	0	0	0	0	24.288	3.93757e-11
6	tr|Q9VQE0|Q9VQE0_DROME	Q9VQE0	Drp1	FBgn0026479	CG3210	7	7	7	24.1507	24.437	24.1843	24.2573	0	0	0	0	24.2573	1.15339e-09
7	tr|Q9VTR6|Q9VTR6_DROME	Q9VTR6	prc	FBgn0028573	CG5700	4	4	4	24.7009	23.6822	24.2876	24.2236	0	0	0	0	24.2236	1.33298e-07
8	tr|Q9W158|Q9W158_DROME	Q9W158	Dmel\CG4612	FBgn0035016	CG4612	3	3	3	24.1568	24.0727	24.356	24.1952	0	0	0	0	24.1952	8.72054e-10
9	sp|P08646|RAS1_DROME	P08646	Ras85D	FBgn0003205	CG9375	4	4	4	23.9989	24.1255	24.4124	24.1789	0	0	0	0	24.1789	3.92589e-09
10	tr|A0A0B4K623|A0A0B4K623_DROME	A0A0B4K623	pug	FBgn0020385	CG4067	5	5	5	24.1628	24.1975	24.0078	24.1227	0	0	0	0	24.1227	2.05163e-10
11	sp|Q9W445|MCTS1_DROME	Q9W445	MCTS1	FBgn0029833	CG5941	4	4	4	24.0404	24.0773	23.8987	24.0055	0	0	0	0	24.0055	1.58612e-10
12	tr|A0A0B4K6I1|A0A0B4K6I1_DROME	A0A0B4K6I1	scrib	FBgn0263289	CG43398	37	4	4	23.3777	23.9284	24.5917	23.9659	0	0	0	0	23.9659	2.75493e-07
13	tr|Q9VMH9|Q9VMH9_DROME	Q9VMH9	Dmel\CG9150	FBgn0031775	CG9150	5	5	5	23.9976	23.6619	23.9378	23.8657	0	0	0	0	23.8657	2.11239e-09
14	tr|A4V201|A4V201_DROME	A4V201	Taf4	FBgn0010280	CG5444	5	5	5	23.8051	23.9647	23.8101	23.86	0	0	0	0	23.86	1.39549e-10
15	tr|Q9XYZ9|Q9XYZ9_DROME	Q9XYZ9	GstE12	FBgn0027590	CG16936	2	2	2	23.7454	24.0438	23.6919	23.827	0	0	0	0	23.827	2.67277e-09
16	tr|Q9V3Y7|Q9V3Y7_DROME	Q9V3Y7	BG:DS01759.2	FBgn0028526	CG15293	5	5	5	24.208	23.5722	23.6665	23.8156	0	0	0	0	23.8156	2.87043e-08
17	tr|Q9VDZ8|Q9VDZ8_DROME	Q9VDZ8	CG117799	FBgn0038683	CG11779	5	5	5	23.8341	23.8508	23.6798	23.7883	0	0	0	0	23.7883	1.64471e-10
18	tr|Q9VEA1|Q9VEA1_DROME	Q9VEA1	eIF1A	FBgn0026250	CG8053	3	3	3	23.6242	23.6413	23.8717	23.7124	0	0	0	0	23.7124	7.69956e-10
19	sp|P06604|TBA2_DROME	P06604	alphaTub85E	FBgn0003886	CG9476	10	3	3	23.8943	23.6881	23.2701	23.6175	0	0	0	0	23.6175	2.19057e-08
20	tr|Q8INS9|Q8INS9_DROME	Q8INS9	gfzf	FBgn0250732	CG33546	3	3	3	23.5147	23.846	23.4811	23.614	0	0	0	0	23.614	3.54705e-09
21	sp|O18373|SPS1_DROME	O18373	Sps1	FBgn0261270	CG8553	3	3	3	23.6528	23.7082	23.356	23.5723	0	0	0	0	23.5723	2.77932e-09
22	tr|Q9V3Y5|Q9V3Y5_DROME	Q9V3Y5	BcDNA.LD23634	FBgn0028474	CG4119	5	5	5	23.2804	23.7793	23.5367	23.5321	0	0	0	0	23.5321	8.41982e-09
23	tr|Q9V3H9|Q9V3H9_DROME	Q9V3H9	Nab2	FBgn0028471	CG5720	3	3	3	23.1289	23.6217	23.4449	23.3985	0	0	0	0	23.3985	8.63654e-09
24	tr|Q9VAY2|Q9VAY2_DROME	Q9VAY2	Gp93	FBgn0039562	CG5520	5	5	5	23.6916	23.2143	23.2473	23.3844	0	0	0	0	23.3844	1.12451e-08
25	tr|E1JJI5|E1JJI5_DROME	E1JJI5	CkIalpha	FBgn0015024	CG2028	2	2	2	23.4276	23.1804	23.4256	23.3446	0	0	0	0	23.3446	9.16423e-10
26	tr|A0A4P7VAW6|A0A4P7VAW6_DROME	A0A4P7VAW6	Rab3	FBgn0005586	CG7576	2	2	2	23.1892	23.3821	23.202	23.2578	0	0	0	0	23.2578	3.07951e-10
27	tr|A0A0B4K813|A0A0B4K813_DROME	A0A0B4K813	RhoGAP100F	FBgn0039883	CG1976	3	3	3	23.0548	22.8744	23.1771	23.0355	0	0	0	0	23.0355	1.27297e-09
28	sp|Q05344|SSRP1_DROME	Q05344	Ssrp	FBgn0010278	CG4817	3	3	3	22.926	23.1303	23.0334	23.0299	0	0	0	0	23.0299	2.58799e-10
29	tr|M9PBH8|M9PBH8_DROME	M9PBH8	FBpp0072605	FBgn0035213	CG2199	2	2	2	22.8529	23.1363	22.8766	22.9552	0	0	0	0	22.9552	1.46706e-09
30	tr|Q9VC28|Q9VC28_DROME	Q9VC28	anon-WO0118547.410	FBgn0039233	CG7006	2	2	2	22.9158	22.9932	22.8504	22.9198	0	0	0	0	22.9198	6.31302e-11
31	tr|A8DZ25|A8DZ25_DROME	A8DZ25	Dmel\CG42748	FBgn0261802	CG42748	2	2	2	22.8446	22.7726	22.9921	22.8697	0	0	0	0	22.8697	3.81879e-10
32	tr|M9PEV2|M9PEV2_DROME	M9PEV2	Dmel\CG5087	FBgn0035953	CG5087	2	2	2	31.2708	30.74	31.1925	31.0678	0	30.6457	0	10.2152	20.8525	0.110812
33	tr|A8DYJ3|A8DYJ3_DROME	A8DYJ3	CalpA	FBgn0012051	CG7563	4	4	4	29.5305	0	29.5335	19.688	0	0	0	0	19.688	0.116117
34	tr|Q7K3J0|Q7K3J0_DROME	Q7K3J0	CCT8	FBgn0284436	CG8258	15	15	15	25.285	27.7669	27.1352	26.729	0	0	26.5204	8.84014	17.8889	0.113957
35	tr|Q7K485|Q7K485_DROME	Q7K485	cathD	FBgn0029093	CG1548	5	5	5	26.4887	26.0227	25.7311	26.0809	0	0	25.418	8.47268	17.6082	0.10632
36	tr|M9PG22|M9PG22_DROME	M9PG22	Arf1	FBgn0010348	CG8385	3	3	2	26.0798	25.8452	25.9536	25.9596	0	0	25.3917	8.4639	17.4957	0.107592
37	tr|Q7K5N8|Q7K5N8_DROME	Q7K5N8	BEST:GH19547	FBgn0034229	CG4847	6	6	6	25.8849	25.2873	25.9618	25.7113	0	25.1474	0	8.38247	17.3289	0.107643
38	tr|M9PBM1|M9PBM1_DROME	M9PBM1	U2af38	FBgn0017457	CG3582	5	5	5	25.715	26.2421	26.0139	25.9903	0	0	26.3096	8.76988	17.2204	0.121097
39	tr|E2QD73|E2QD73_DROME	E2QD73	dnc	FBgn0000479	CG32498	13	13	13	25.5501	25.6407	25.4975	25.5628	0	0	25.036	8.34533	17.2174	0.108072
40	tr|Q9W078|Q9W078_DROME	Q9W078	Cpr62Bb	FBgn0035280	CG13935	4	4	4	26.3906	24.3418	25.9555	25.5626	0	0	25.2703	8.42345	17.1392	0.112321
41	tr|M9PDS8|M9PDS8_DROME	M9PDS8	sls	FBgn0086906	CG1915	22	22	22	25.0175	26.1991	25.9215	25.7127	0	0	25.7657	8.58858	17.1241	0.117168
42	tr|Q9W392|Q9W392_DROME	Q9W392	CCT2	FBgn0030086	CG7033	9	9	9	25.2891	25.7511	25.394	25.4781	0	0	25.0927	8.36424	17.1138	0.110217
43	tr|Q9VV18|Q9VV18_DROME	Q9VV18	Dmel\CG13047	FBgn0036594	CG13047	2	2	2	25.6815	0	25.5634	17.0816	0	0	0	0	17.0816	0.116119
44	tr|A0A0B4K6U6|A0A0B4K6U6_DROME	A0A0B4K6U6	sqd	FBgn0263396	CG16901	4	4	4	25.6174	25.1241	25.115	25.2855	0	0	24.6336	8.21121	17.0743	0.106147
45	tr|Q9VZE4|Q9VZE4_DROME	Q9VZE4	cg1316	FBgn0035526	CG1316	7	7	7	25.5224	25.6099	25.2962	25.4762	0	0	25.3498	8.44993	17.0262	0.114168
46	tr|Q9VSN3|Q9VSN3_DROME	Q9VSN3	Cpr66D	FBgn0052029	CG32029	5	5	5	26.2886	24.3831	25.2325	25.3014	0	0	24.9831	8.32769	16.9737	0.111732
47	tr|E1JHA4|E1JHA4_DROME	E1JHA4	Hrb27C	FBgn0004838	CG10377	4	4	4	25.7733	25.1243	25.0858	25.3278	0	0	25.0623	8.3541	16.9737	0.112078
48	tr|Q7K0W4|Q7K0W4_DROME	Q7K0W4	Vajk4	FBgn0050101	CG30101	5	5	5	25.1537	0	25.7466	16.9668	0	0	0	0	16.9668	0.11617
49	sp|Q9VSL3|SEPIA_DROME	Q9VSL3	se	FBgn0086348	CG6781	9	9	9	25.0688	26.1501	25.5523	25.5904	0	0	25.8906	8.6302	16.9602	0.121009
50	tr|Q9VK60|Q9VK60_DROME	Q9VK60	Dmel\CG6180	FBgn0032453	CG6180	5	5	5	25.5463	24.8896	25.082	25.1726	0	0	24.7385	8.24617	16.9265	0.109433
51	tr|E5DK16|E5DK16_DROME	E5DK16	Lpin	FBgn0263593	CG8709	11	11	11	25.0592	25.5323	25.4026	25.3314	0	0	25.2657	8.4219	16.9095	0.115125
52	tr|E2QCF1|E2QCF1_DROME	E2QCF1	ATPCL	FBgn0020236	CG8322	14	14	14	25.1752	25.4804	25.569	25.4082	0	0	25.525	8.50835	16.8998	0.117979
53	tr|X2JAB9|X2JAB9_DROME	X2JAB9	Vinc	FBgn0004397	CG3299	16	16	16	25.7592	25.0888	25.3248	25.3909	0	0	25.4959	8.49863	16.8923	0.117838
54	tr|Q9VRU0|Q9VRU0_DROME	Q9VRU0	Dmel\CG10469	FBgn0035678	CG10469	4	4	4	25.6396	25.1222	25.463	25.4083	0	0	25.553	8.51767	16.8906	0.118436
55	sp|P25455|PIP1_DROME	P25455	Plc21C	FBgn0004611	CG4574	12	12	12	25.253	25.4065	25.5177	25.3924	0	0	25.5937	8.53125	16.8611	0.119303
56	tr|Q59E23|Q59E23_DROME	Q59E23	Hn	FBgn0001208	CG7399	7	7	7	24.8245	24.984	24.7794	24.8626	0	0	24.0943	8.03145	16.8312	0.10417
57	tr|Q9VVC3|Q9VVC3_DROME	Q9VVC3	Cpr73D	FBgn0036680	CG9665	7	7	7	26.8193	23.6027	25.6522	25.3581	0	0	25.6442	8.54807	16.81	0.12229
58	tr|M9PBH7|M9PBH7_DROME	M9PBH7	Rac1	FBgn0010333	CG2248	4	4	2	25.2211	25.4161	25.5138	25.3837	0	0	25.739	8.57966	16.804	0.121766
59	tr|Q9VVL7|Q9VVL7_DROME	Q9VVL7	E3	FBgn0036762	CG7430	7	7	7	25.0392	24.9688	25.225	25.0777	0	0	24.8928	8.29761	16.78	0.113215
60	tr|Q9VJL9|Q9VJL9_DROME	Q9VJL9	MET30	FBgn0028897	CG4935	7	7	7	24.9441	25.0703	24.5875	24.8673	0	0	24.3253	8.10842	16.7589	0.107654
61	tr|Q9VM12|Q9VM12_DROME	Q9VM12	Dmel\CG5958	FBgn0031913	CG5958	6	6	6	25.3946	24.9758	25.2721	25.2142	0	0	25.4121	8.4707	16.7435	0.119289
62	tr|A1ZA23|A1ZA23_DROME	A1ZA23	Dmel\CG8192	FBgn0034030	CG8192	4	4	4	25.5865	0	24.5975	16.728	0	0	0	0	16.728	0.116271
63	sp|Q9GU68|IF5A_DROME	Q9GU68	eEF5	FBgn0285952	CG3186	4	4	4	25.0992	25.1592	25.0328	25.097	0	25.178	0	8.39267	16.7044	0.117406
64	tr|A0A0B4LGM0|A0A0B4LGM0_DROME	A0A0B4LGM0	prom	FBgn0259210	CG42310	7	7	7	24.9065	24.9965	25.2129	25.0386	0	0	25.0116	8.33721	16.7014	0.115704
65	sp|Q24208|IF2G_DROME	Q24208	eIF2gamma	FBgn0263740	CG43665	9	9	9	25.0341	25.2496	24.9875	25.0904	0	0	25.1788	8.39292	16.6975	0.117534
66	sp|Q95029|CATL_DROME	Q95029	Cp1	FBgn0013770	CG6692	6	6	6	24.9467	24.7488	25.0704	24.922	0	0	24.6776	8.22587	16.6961	0.112267
67	tr|M9PG32|M9PG32_DROME	M9PG32	Taf6	FBgn0010417	CG32211	7	7	7	25.0907	24.984	24.832	24.9689	0	0	24.8897	8.29656	16.6723	0.114869
68	tr|Q9VW05|Q9VW05_DROME	Q9VW05	Cpr76Bd	FBgn0036881	CG9299	11	11	11	25.1993	24.7162	0	16.6385	0	0	0	0	16.6385	0.116154
69	tr|A1Z8H6|A1Z8H6_DROME	A1Z8H6	Cpr47Ee	FBgn0033602	CG13222	4	4	4	25.177	0	24.7176	16.6315	0	0	0	0	16.6315	0.11615
70	sp|Q9V431|API5_DROME	Q9V431	cass	FBgn0286781	CG6582	8	8	8	25.2186	24.9261	24.666	24.9369	0	0	25.0402	8.34674	16.5901	0.11782
71	tr|Q9I7J0|Q9I7J0_DROME	Q9I7J0	Dmel\CG5023	FBgn0038774	CG5023	5	5	5	25.1312	25.1614	24.6015	24.9647	0	0	25.1333	8.37776	16.587	0.118881
72	tr|Q9VPE2|Q9VPE2_DROME	Q9VPE2	ND-39	FBgn0037001	CG6020	7	7	7	25.456	24.1306	24.7831	24.7899	0	0	24.6107	8.20355	16.5864	0.113542
73	tr|Q95RB1|Q95RB1_DROME	Q95RB1	Dmel\CG14641	FBgn0037220	CG14641	5	5	5	24.8277	24.9973	24.4101	24.745	0	24.4779	0	8.1593	16.5857	0.111922
74	tr|O61380|O61380_DROME	O61380	eIF4G1	FBgn0023213	CG10811	9	9	9	23.7158	25.2702	24.5779	24.5213	0	0	23.9103	7.9701	16.5512	0.106823
75	tr|A4V303|A4V303_DROME	A4V303	CCT3	FBgn0015019	CG8977	8	8	8	24.8755	24.7978	24.5624	24.7453	0	0	24.674	8.22467	16.5206	0.114991
76	tr|A1Z8Q0|A1Z8Q0_DROME	A1Z8Q0	Twdlbeta	FBgn0033658	CG8986	4	4	3	0	24.2804	25.2553	16.5119	0	0	0	0	16.5119	0.116271
77	tr|A0A0B4K7H5|A0A0B4K7H5_DROME	A0A0B4K7H5	Mmp1	FBgn0035049	CG4859	5	5	5	24.793	24.4276	24.5019	24.5741	0	0	24.2138	8.07126	16.5029	0.110384
78	tr|Q9VSX2|Q9VSX2_DROME	Q9VSX2	BEST:GH12586	FBgn0035982	CG4461	4	4	4	25.3461	23.9543	24.406	24.5688	0	0	24.2323	8.07743	16.4914	0.111065
79	tr|A0A0B4JDA0|A0A0B4JDA0_DROME	A0A0B4JDA0	mor	FBgn0002783	CG18740	7	7	7	24.3975	24.9554	25.1825	24.8451	0	0	25.0868	8.36226	16.4828	0.120124
80	tr|M9MSI3|M9MSI3_DROME	M9MSI3	Vajk1	FBgn0028938	CG16886	5	5	5	24.7783	0	24.6199	16.4661	0	0	0	0	16.4661	0.116121
81	tr|Q7KUX3|Q7KUX3_DROME	Q7KUX3	Septin4	FBgn0259923	CG9699	5	5	5	24.4628	24.5677	24.8965	24.6423	0	0	24.5375	8.17918	16.4631	0.114465
82	tr|Q9VEH0|Q9VEH0_DROME	Q9VEH0	alt	FBgn0038535	CG18212	8	8	8	24.0046	25.2159	24.4636	24.5614	0	0	24.3531	8.11769	16.4437	0.113014
83	tr|Q9VIE7|Q9VIE7_DROME	Q9VIE7	bur	FBgn0000239	CG9242	7	7	7	0	24.7447	24.5853	16.4433	0	0	0	0	16.4433	0.116121
84	sp|O61722|PRL1_DROME	O61722	PRL-1	FBgn0024734	CG4993	4	4	4	24.5302	24.5625	24.7657	24.6195	0	0	24.5729	8.19096	16.4285	0.115376
85	tr|E1JGN0|E1JGN0_DROME	E1JGN0	par-1	FBgn0260934	CG8201	7	7	7	24.4133	24.6103	24.5296	24.5178	0	0	24.2704	8.09014	16.4276	0.112146
86	tr|Q8SXM8|Q8SXM8_DROME	Q8SXM8	LysRS	FBgn0027084	CG12141	9	9	9	24.8409	24.8188	24.9451	24.8683	0	0	25.3461	8.44871	16.4195	0.12389
87	sp|Q27268|DX39B_DROME	Q27268	Hel25E	FBgn0014189	CG7269	7	7	7	24.6801	24.518	24.7894	24.6625	0	0	24.8013	8.26711	16.3954	0.118379
88	tr|Q8INW9|Q8INW9_DROME	Q8INW9	fon	FBgn0032773	CG15825	4	4	4	24.8047	24.1106	23.9559	24.2904	0	0	23.7639	7.92128	16.3691	0.107797
89	tr|Q9VT32|Q9VT32_DROME	Q9VT32	Prps	FBgn0036030	CG6767	4	4	4	24.8289	24.4996	24.2625	24.5303	0	24.5094	0	8.16981	16.3605	0.115831
90	tr|Q9VJ86|Q9VJ86_DROME	Q9VJ86	bsf	FBgn0284256	CG10302	10	10	10	25.0299	24.1684	24.1741	24.4575	0	0	24.3497	8.11656	16.3409	0.114534
91	sp|Q9VI10|SMD2_DROME	Q9VI10	SmD2	FBgn0261789	CG1249	3	3	3	24.2514	24.9763	24.5388	24.5888	0	0	24.7956	8.26519	16.3236	0.119573
92	tr|H8F4T6|H8F4T6_DROME	H8F4T6	CG16935-RA	FBgn0033883	CG16935	6	6	6	24.7955	24.3155	24.3575	24.4895	0	0	24.5221	8.17404	16.3155	0.116694
93	tr|Q9VMI3|Q9VMI3_DROME	Q9VMI3	ND-51	FBgn0031771	CG9140	5	5	5	24.8134	24.416	24.6608	24.6301	0	0	24.9813	8.3271	16.303	0.121885
94	tr|A0A0B4K7P8|A0A0B4K7P8_DROME	A0A0B4K7P8	shot	FBgn0013733	CG18076	11	11	11	24.3658	24.7164	23.8559	24.3127	0	0	24.0414	8.01381	16.2989	0.111848
95	tr|Q9VJH2|Q9VJH2_DROME	Q9VJH2	AspRS-m	FBgn0051739	CG31739	9	9	9	24.4036	24.6545	24.4733	24.5104	0	0	24.6361	8.21202	16.2984	0.118175
96	tr|Q9VL89|Q9VL89_DROME	Q9VL89	und	FBgn0283478	CG4008	3	3	3	24.4275	24.3342	24.6119	24.4579	0	0	24.4815	8.16049	16.2974	0.116514
97	sp|P07701|SGS5_DROME	P07701	Sgs5	FBgn0003375	CG7596	2	2	2	25.3614	24.2217	24.1444	24.5758	0	0	24.9098	8.30325	16.2726	0.121891
98	tr|Q7K7G0|Q7K7G0_DROME	Q7K7G0	deltaCOP	FBgn0028969	CG14813	7	7	7	24.4273	24.4817	24.2591	24.3894	0	0	24.3753	8.1251	16.2643	0.115896
99	tr|A0A0B4LEV8|A0A0B4LEV8_DROME	A0A0B4LEV8	coil	FBgn0033265	CG8710	4	4	4	23.9577	0	24.8259	16.2612	0	0	0	0	16.2612	0.116242
100	tr|Q9VB86|Q9VB86_DROME	Q9VB86	TwdlT	FBgn0029170	CG5812	4	3	3	24.2598	0	24.5237	16.2612	0	0	0	0	16.2612	0.116128
101	tr|M9MQH9|M9MQH9_DROME	M9MQH9	Pp2A-29B	FBgn0260439	CG17291	6	6	6	24.6013	24.5355	24.4132	24.5167	0	24.7826	0	8.26087	16.2558	0.120478
102	tr|B7YZI0|B7YZI0_DROME	B7YZI0	Vha44	FBgn0287825	CG8048	7	7	7	24.7952	24.0767	24.316	24.3959	0	0	24.4276	8.14255	16.2534	0.116724
103	tr|Q7K3V6|Q7K3V6_DROME	Q7K3V6	mEFTu2	FBgn0033184	CG12736	7	7	7	24.4498	24.2331	24.4114	24.3648	0	0	24.3422	8.11406	16.2507	0.115757
104	tr|Q9V428|Q9V428_DROME	Q9V428	ics	FBgn0028546	CG9031	6	6	6	24.7994	24.4269	24.2507	24.4923	0	0	24.756	8.25199	16.2403	0.120491
105	sp|Q24210|CSKP_DROME	Q24210	CASK	FBgn0013759	CG6703	7	7	3	24.0849	24.3399	24.5054	24.3101	0	0	24.2907	8.09691	16.2132	0.115831
106	tr|Q2PDY2|Q2PDY2_DROME	Q2PDY2	Trl	FBgn0013263	CG33261	4	4	4	24.11	23.8693	24.7316	24.237	0	0	24.0824	8.02746	16.2095	0.113728
107	tr|Q8IMQ8|Q8IMQ8_DROME	Q8IMQ8	Dmel\CG6330	FBgn0039464	CG6330	3	3	3	24.4418	24.0918	24.5089	24.3475	0	0	24.4187	8.13956	16.208	0.117316
108	tr|A0A6H2EFD0|A0A6H2EFD0_DROME	A0A6H2EFD0	gish	FBgn0250823	CG6963	6	6	6	24.3363	24.4825	24.2631	24.3606	0	0	24.4608	8.15361	16.207	0.117767
109	tr|Q9VYU7|Q9VYU7_DROME	Q9VYU7	dy	FBgn0004511	CG9355	2	2	2	24.3515	0	24.2581	16.2032	0	0	0	0	16.2032	0.116118
110	sp|Q7KMJ6|NITO_DROME	Q7KMJ6	nito	FBgn0027548	CG2910	9	9	9	24.1632	24.4201	24.2675	24.2836	0	0	24.2939	8.09797	16.1856	0.116297
111	tr|A0A0S0WGW8|A0A0S0WGW8_DROME	A0A0S0WGW8	l(3)mbn	FBgn0002440	CG12755	4	4	4	23.7692	0	24.7758	16.1817	0	0	0	0	16.1817	0.116287
112	tr|X2JJD6|X2JJD6_DROME	X2JJD6	Dmel\CG2145	FBgn0030251	CG2145	7	7	7	24.2381	24.3839	24.4801	24.3674	0	0	24.5597	8.18657	16.1808	0.119287
113	tr|X2JE34|X2JE34_DROME	X2JE34	eIF4H1	FBgn0262734	CG4429	4	4	4	24.2594	24.4312	24.2665	24.319	0	0	24.416	8.13868	16.1803	0.117715
114	tr|Q500X4|Q500X4_DROME	Q500X4	S-Lap7	FBgn0033868	CG13340	6	5	5	25.4764	0	23.0547	16.177	0	0	0	0	16.177	0.117106
115	sp|Q9NHA8|BGBP3_DROME	Q9NHA8	GNBP3	FBgn0040321	CG5008	4	4	4	23.7162	24.9711	24.5781	24.4218	0	0	24.7753	8.25843	16.1634	0.122222
116	sp|O02195|EIF3I_DROME	O02195	eIF3i	FBgn0015834	CG8882	4	4	4	24.4564	24.1247	23.921	24.1674	0	0	24.0371	8.01236	16.155	0.114032
117	tr|Q9VAY6|Q9VAY6_DROME	Q9VAY6	BCAS2	FBgn0039558	CG4980	4	4	4	0	24.4849	23.9545	16.1464	0	0	0	0	16.1464	0.116164
118	tr|A0A0B4K6D2|A0A0B4K6D2_DROME	A0A0B4K6D2	p23	FBgn0037728	CG16817	3	3	3	0	24.2227	24.2084	16.1437	0	0	0	0	16.1437	0.116117
119	tr|Q9VP57|Q9VP57_DROME	Q9VP57	pzg	FBgn0259785	CG7752	5	5	5	24.4303	23.7557	24.1572	24.1144	0	0	23.9203	7.97342	16.141	0.113015
120	sp|Q9V4N3|CYB5_DROME	Q9V4N3	Cyt-b5	FBgn0264294	CG2140	2	2	2	0	24.1109	24.3066	16.1392	0	0	0	0	16.1392	0.116123
121	tr|M9MS72|M9MS72_DROME	M9MS72	Pka-R1	FBgn0259243	CG42341	4	4	4	24.5009	23.8984	0	16.1331	0	0	0	0	16.1331	0.116178
122	tr|M9PGQ6|M9PGQ6_DROME	M9PGQ6	Bx42	FBgn0004856	CG8264	7	7	7	0	24.5834	23.8033	16.1289	0	0	0	0	16.1289	0.11622
123	sp|Q9V4C8|HCF_DROME	Q9V4C8	Hcf	FBgn0039904	CG1710	4	4	4	24.0468	24.1969	24.2993	24.181	0	0	24.1617	8.0539	16.1271	0.11581
124	tr|A4V391|A4V391_DROME	A4V391	CCT1	FBgn0003676	CG5374	8	8	8	24.1075	24.2736	0	16.127	0	0	0	0	16.127	0.116121
125	tr|M9PF36|M9PF36_DROME	M9PF36	DmTOM1	FBgn0035995	CG3529	3	3	3	0	24.223	24.1501	16.1244	0	0	0	0	16.1244	0.116117
126	sp|Q7KW39|MMSA_DROME	Q7KW39	CG17896	FBgn0023537	CG17896	6	6	6	24.1008	24.0626	24.075	24.0794	0	0	23.8768	7.95893	16.1205	0.112794
127	tr|Q9VXI1|Q9VXI1_DROME	Q9VXI1	Had1	FBgn0286508	CG9914	5	5	5	24.921	23.5862	24.1703	24.2258	24.3178	0	0	8.10594	16.1199	0.117936
128	tr|Q9VIX3|Q9VIX3_DROME	Q9VIX3	Pax	FBgn0041789	CG31794	5	5	5	24.4476	24.3047	24.3348	24.3624	0	0	24.759	8.25301	16.1094	0.122688
129	tr|A0A0B4LGT4|A0A0B4LGT4_DROME	A0A0B4LGT4	Arl8	FBgn0037551	CG7891	3	3	3	0	24.2423	24.0638	16.1021	0	0	0	0	16.1021	0.116122
130	tr|Q9VRL0|Q9VRL0_DROME	Q9VRL0	Cyt-c1	FBgn0035600	CG4769	4	4	4	24.4751	24.0373	23.8735	24.1287	0	0	24.1002	8.0334	16.0953	0.115714
131	tr|A4V3W2|A4V3W2_DROME	A4V3W2	sgg	FBgn0003371	CG2621	6	6	6	24.2832	24.3342	24.1955	24.271	0	0	24.6035	8.20118	16.0698	0.121635
132	tr|Q8SXX1|Q8SXX1_DROME	Q8SXX1	PIP4K	FBgn0039924	CG17471	4	4	4	24.2196	24.5008	24.1861	24.3021	0	0	24.7195	8.23984	16.0623	0.12307
133	sp|P80455|RS12_DROME	P80455	RpS12	FBgn0286213	CG11271	4	4	4	24.1628	23.911	24.3284	24.1341	0	0	24.2364	8.07881	16.0553	0.11784
134	tr|Q6NNV7|Q6NNV7_DROME	Q6NNV7	Dmel\CG40485	FBgn0069973	CG40485	2	2	2	0	24.3792	23.7835	16.0542	0	0	0	0	16.0542	0.116177
135	tr|M9PG76|M9PG76_DROME	M9PG76	RpLP0	FBgn0000100	CG7490	6	6	6	24.2173	24.0627	24.0841	24.1214	0	0	24.2275	8.07584	16.0455	0.117878
136	tr|A0A0B4KHU1|A0A0B4KHU1_DROME	A0A0B4KHU1	Rlip	FBgn0026056	CG11622	3	3	3	23.9134	24.171	23.8727	23.9857	0	0	23.8412	7.94708	16.0386	0.113752
137	tr|Q9VMV5|Q9VMV5_DROME	Q9VMV5	vkg	FBgn0016075	CG16858	4	4	4	23.9746	23.7594	25.0561	24.2634	0	24.6849	0	8.2283	16.035	0.123459
138	tr|Q9VVZ4|Q9VVZ4_DROME	Q9VVZ4	Dmel\CG14095	FBgn0036870	CG14095	2	2	2	24.2159	0	23.8587	16.0249	0	0	0	0	16.0249	0.116138
139	tr|A4V441|A4V441_DROME	A4V441	sn	FBgn0003447	CG32858	5	5	5	24.0981	23.8604	23.8169	23.9252	0	0	23.7282	7.90939	16.0158	0.112881
140	tr|A0A0B4LG19|A0A0B4LG19_DROME	A0A0B4LG19	Dmel\CG10737	FBgn0034420	CG10737	7	7	7	24.1887	24.2196	24.0532	24.1538	0	0	24.4352	8.14506	16.0087	0.120802
141	sp|Q9VWG3|RS10B_DROME	Q9VWG3	RpS10b	FBgn0285947	CG14206	2	2	2	24.3424	23.9936	23.7761	24.0373	0	0	24.0968	8.03228	16.0051	0.117159
142	tr|Q9VND3|Q9VND3_DROME	Q9VND3	Pi4KIIalpha	FBgn0037339	CG2929	6	6	6	0	24.0444	23.9409	15.9951	0	0	0	0	15.9951	0.116118
143	tr|Q9VPU7|Q9VPU7_DROME	Q9VPU7	aru	FBgn0029095	CG4276	6	6	6	24.1844	24.1347	24.0756	24.1316	0	0	24.4246	8.14155	15.99	0.121
144	tr|Q9VL01|Q9VL01_DROME	Q9VL01	c-SPH35	FBgn0032213	CG5390	4	4	4	24.3543	0	23.611	15.9884	0	0	0	0	15.9884	0.116212
145	tr|Q9VJZ4|Q9VJZ4_DROME	Q9VJZ4	ND-B22	FBgn0032511	CG9306	5	5	5	23.8019	0	24.1561	15.986	0	0	0	0	15.986	0.116138
146	tr|B5RIR1|B5RIR1_DROME	B5RIR1	nrv1	FBgn0015776	CG9258	3	3	3	24.3185	23.6925	23.955	23.9887	0	0	24.0113	8.00376	15.9849	0.11656
147	sp|Q24491|RX21_DROME	Q24491	Rsf1	FBgn0011305	CG5655	3	3	3	0	23.7661	24.1776	15.9812	0	0	0	0	15.9812	0.116146
148	tr|Q0E8E8|Q0E8E8_DROME	Q0E8E8	Mpcp2	FBgn0026409	CG4994	4	4	4	24.0865	24.3657	24.2333	24.2285	0	0	24.8033	8.26775	15.9608	0.125759
149	tr|X2J969|X2J969_DROME	X2J969	MED19	FBgn0036761	CG5546	2	2	2	23.9709	23.789	24.5197	24.0932	0	0	24.4313	8.14376	15.9494	0.121866
150	tr|Q24090|Q24090_DROME	Q24090	Snr1	FBgn0011715	CG1064	4	4	4	23.7938	24.0858	23.9701	23.9499	0	0	24.0154	8.00513	15.9448	0.117222
151	tr|Q9VEJ9|Q9VEJ9_DROME	Q9VEJ9	cysu	FBgn0038511	CG5873	4	4	4	24.2934	0	23.4815	15.925	0	0	0	0	15.925	0.116231
152	tr|Q9VEA7|Q9VEA7_DROME	Q9VEA7	Dmel\CG18598	FBgn0038589	CG18598	3	3	3	23.8954	0	23.871	15.9221	0	0	0	0	15.9221	0.116117
153	tr|A0A0B4KHJ5|A0A0B4KHJ5_DROME	A0A0B4KHJ5	GlyS	FBgn0266064	CG6904	7	7	7	24.1286	23.7671	23.8479	23.9145	0	0	23.99	7.99666	15.9179	0.1174
154	tr|Q9VRZ1|Q9VRZ1_DROME	Q9VRZ1	Prat2	FBgn0041194	CG10078	4	4	4	24.1006	23.5218	23.9175	23.8466	0	0	23.8018	7.93394	15.9127	0.115431
155	sp|Q9VKD3|NFS1_DROME	Q9VKD3	Nfs1	FBgn0032393	CG12264	4	4	4	23.8357	23.9592	23.8255	23.8734	0	0	23.8956	7.9652	15.9082	0.11649
156	tr|Q8IPE8|Q8IPE8_DROME	Q8IPE8	Mtpalpha	FBgn0028479	CG4389	5	5	5	23.7135	23.7978	23.8829	23.798	0	0	23.7005	7.90016	15.8979	0.114497
157	tr|F0JAN1|F0JAN1_DROME	F0JAN1	Paics	FBgn0020513	CG3989	7	7	7	23.4759	24.6131	24.2529	24.114	0	0	24.6661	8.22204	15.8919	0.125636
158	tr|A0A0B4LH64|A0A0B4LH64_DROME	A0A0B4LH64	Atx2	FBgn0041188	CG5166	2	2	2	23.6569	0	23.9868	15.8812	0	0	0	0	15.8812	0.116136
159	tr|Q9VZJ2|Q9VZJ2_DROME	Q9VZJ2	Dmel\CG1136	FBgn0035490	CG1136	4	4	4	24.3844	0	23.2514	15.8786	0	0	0	0	15.8786	0.116341
160	tr|M9PBK5|M9PBK5_DROME	M9PBK5	RpLP1	FBgn0002593	CG4087	3	3	3	0	23.8131	23.7778	15.8636	0	0	0	0	15.8636	0.116117
161	sp|Q9TVP3|JDP_DROME	Q9TVP3	jdp	FBgn0027654	CG2239	2	2	2	0	23.82	23.7179	15.8459	0	0	0	0	15.8459	0.116118
162	tr|Q94883|Q94883_DROME	Q94883	Dref	FBgn0015664	CG5838	3	3	3	23.7611	0	23.7711	15.8441	0	0	0	0	15.8441	0.116117
163	tr|Q9VKX2|Q9VKX2_DROME	Q9VKX2	Mdh1	FBgn0262782	CG5362	3	3	3	23.949	23.5829	0	15.844	0	0	0	0	15.844	0.11614
164	tr|M9ND19|M9ND19_DROME	M9ND19	Gale	FBgn0035147	CG12030	5	5	5	24.0229	23.5879	23.6081	23.7396	0	0	23.6885	7.89616	15.8435	0.115303
165	tr|X2J6D4|X2J6D4_DROME	X2J6D4	Cyt-c-p	FBgn0284248	CG17903	4	4	4	24.5117	22.9886	0	15.8334	0	0	0	0	15.8334	0.116525
166	tr|Q9VN86|Q9VN86_DROME	Q9VN86	Sccpdh1	FBgn0037298	CG2604	6	6	6	24.0084	23.8889	24.0712	23.9895	0	0	24.485	8.16166	15.8278	0.124485
167	tr|Q9VTB3|Q9VTB3_DROME	Q9VTB3	Dmel\CG11811	FBgn0036099	CG11811	2	2	2	0	23.7145	23.7409	15.8185	0	0	0	0	15.8185	0.116117
168	tr|Q9W0E4|Q9W0E4_DROME	Q9W0E4	Psa	FBgn0261243	CG1009	5	5	5	23.4584	23.9884	0	15.8156	0	0	0	0	15.8156	0.116166
169	tr|A0A0B4K7V8|A0A0B4K7V8_DROME	A0A0B4K7V8	brp	FBgn0259246	CG42344	5	5	5	0	23.3407	24.0951	15.8119	0	0	0	0	15.8119	0.116217
170	tr|Q962I2|Q962I2_DROME	Q962I2	Rala	FBgn0015286	CG2849	3	3	3	24.0407	23.731	23.7138	23.8285	0	0	24.0558	8.0186	15.8099	0.119967
171	sp|P12080|ITA2_DROME	P12080	if	FBgn0001250	CG9623	5	5	5	24.0714	23.3066	23.6227	23.6669	0	0	23.5804	7.86013	15.8068	0.114772
172	tr|X2JEU3|X2JEU3_DROME	X2JEU3	Dmel\CG1737	FBgn0030293	CG1737	4	4	4	0	23.7064	23.7044	15.8036	0	0	0	0	15.8036	0.116117
173	tr|Q9W373|Q9W373_DROME	Q9W373	SmydA-9	FBgn0030102	CG12119	4	4	4	23.7309	23.6356	0	15.7888	0	0	0	0	15.7888	0.116118
174	tr|Q9VH72|Q9VH72_DROME	Q9VH72	BVR	FBgn0037749	CG9471	3	3	3	23.6161	0	23.746	15.7874	0	0	0	0	15.7874	0.11612
175	tr|M9PIG8|M9PIG8_DROME	M9PIG8	Rpn10	FBgn0015283	CG7619	3	3	3	23.8539	0	23.4884	15.7807	0	0	0	0	15.7807	0.11614
176	tr|Q9VKZ8|Q9VKZ8_DROME	Q9VKZ8	Usp14	FBgn0032216	CG5384	4	4	4	23.6863	23.6415	0	15.776	0	0	0	0	15.776	0.116117
177	tr|M9PJP0|M9PJP0_DROME	M9PJP0	Nipsnap	FBgn0030724	CG9212	5	5	5	23.4904	23.8083	0	15.7663	0	0	0	0	15.7663	0.116134
178	tr|E2QC83|E2QC83_DROME	E2QC83	Pabp2	FBgn0005648	CG2163	2	2	2	0	23.6157	23.6346	15.7501	0	0	0	0	15.7501	0.116117
179	tr|A4V4F2|A4V4F2_DROME	A4V4F2	Flo2	FBgn0264078	CG32593	5	5	5	23.9748	23.6716	23.8372	23.8279	0	0	24.2689	8.08964	15.7382	0.123613
180	tr|Q9W3Y3|Q9W3Y3_DROME	Q9W3Y3	Dmel\CG3226	FBgn0029882	CG3226	3	3	3	0	23.7391	23.4521	15.7304	0	0	0	0	15.7304	0.116131
181	tr|Q95RF6|Q95RF6_DROME	Q95RF6	Tom20	FBgn0036928	CG7654	2	2	2	23.7501	0	23.3983	15.7161	0	0	0	0	15.7161	0.116139
182	tr|M9MRX4|M9MRX4_DROME	M9MRX4	Ank2	FBgn0261788	CG42734	6	6	6	23.4207	23.6642	23.5041	23.5297	0	0	23.4704	7.82345	15.7062	0.115127
183	sp|P17210|KINH_DROME	P17210	Khc	FBgn0001308	CG7765	3	3	3	23.5404	23.5603	0	15.7002	0	0	0	0	15.7002	0.116117
184	tr|A8JNL6|A8JNL6_DROME	A8JNL6	sif	FBgn0085447	CG34418	5	5	5	0	23.4176	23.6707	15.6961	0	0	0	0	15.6961	0.116128
185	tr|Q95U34|Q95U34_DROME	Q95U34	Galk	FBgn0263199	CG5288	4	4	4	23.5737	23.2471	23.7502	23.5237	0	0	23.5273	7.84244	15.6812	0.116225
186	tr|E2QCG7|E2QCG7_DROME	E2QCG7	eIF3b	FBgn0034237	CG4878	4	4	4	23.3586	24.086	23.6148	23.6865	0	0	24.0816	8.02721	15.6593	0.122945
187	tr|Q9VRY5|Q9VRY5_DROME	Q9VRY5	Sbds	FBgn0035714	CG8549	3	3	3	23.838	0	23.1138	15.6506	0	0	0	0	15.6506	0.116211
188	tr|Q8IH14|Q8IH14_DROME	Q8IH14	ssx	FBgn0024987	CG3056	3	3	3	23.451	0	23.4679	15.6396	0	0	0	0	15.6396	0.116117
189	sp|P13496|DCTN1_DROME	P13496	DCTN1-p150	FBgn0001108	CG9206	5	5	5	23.4718	23.4144	23.3692	23.4185	0	0	23.342	7.78068	15.6378	0.114824
190	sp|Q7KUT2|LONM_DROME	Q7KUT2	Lon	FBgn0036892	CG8798	6	6	6	23.428	23.511	23.5475	23.4955	0	0	23.5792	7.85974	15.6357	0.117541
191	tr|X2JLM6|X2JLM6_DROME	X2JLM6	Usp2	FBgn0031187	CG14619	5	5	5	23.3283	23.5582	0	15.6288	0	0	0	0	15.6288	0.116126
192	tr|Q24474|Q24474_DROME	Q24474	Rbp9	FBgn0010263	CG3151	3	3	3	23.6225	23.3805	23.4282	23.4771	0	0	23.5517	7.85056	15.6265	0.117396
193	tr|Q7JWX3|Q7JWX3_DROME	Q7JWX3	nec	FBgn0002930	CG1857	4	4	4	23.5127	23.3612	0	15.6246	0	0	0	0	15.6246	0.116121
194	tr|Q7K1W5|Q7K1W5_DROME	Q7K1W5	Dmel\CG8187	FBgn0034027	CG8187	2	2	2	23.47	0	23.3129	15.5943	0	0	0	0	15.5943	0.116121
195	tr|Q9W0M4|Q9W0M4_DROME	Q9W0M4	Dmel\CG13887	FBgn0035165	CG13887	2	2	2	23.535	23.186	0	15.5737	0	0	0	0	15.5737	0.116139
196	tr|D5A7M1|D5A7M1_DROME	D5A7M1	EbpIII	FBgn0011695	CG11390	2	2	2	23.479	0	23.2301	15.5697	0	0	0	0	15.5697	0.116128
197	tr|Q7KM04|Q7KM04_DROME	Q7KM04	Eip63E	FBgn0005640	CG10579	3	3	3	23.376	23.4514	23.406	23.4111	0	0	23.5404	7.84679	15.5643	0.118324
198	tr|X2JFR1|X2JFR1_DROME	X2JFR1	nonA	FBgn0004227	CG4211	5	5	5	23.7332	23.7638	23.6906	23.7292	0	0	24.4995	8.16649	15.5627	0.12939
199	tr|Q9VGS3|Q9VGS3_DROME	Q9VGS3	SdhC	FBgn0037873	CG6666	3	3	3	23.4418	23.2328	0	15.5582	0	0	0	0	15.5582	0.116124
200	sp|Q9V9S8|HEMH_DROME	Q9V9S8	FeCh	FBgn0266268	CG2098	4	4	4	23.7007	23.3112	23.3152	23.4424	0	0	23.6672	7.88907	15.5533	0.119999
201	sp|Q9VLN1|WDR82_DROME	Q9VLN1	Wdr82	FBgn0032030	CG17293	2	2	2	23.2379	23.2489	0	15.4956	0	0	0	0	15.4956	0.116117
202	tr|Q9VLQ7|Q9VLQ7_DROME	Q9VLQ7	Spn28F	FBgn0028987	CG8137	3	3	3	23.4966	0	22.9475	15.4814	0	0	0	0	15.4814	0.116172
203	tr|Q8IMC1|Q8IMC1_DROME	Q8IMC1	Gat	FBgn0039915	CG1732	3	3	3	0	22.9713	23.4202	15.4639	0	0	0	0	15.4639	0.116154
204	tr|Q9VZ69|Q9VZ69_DROME	Q9VZ69	Imp	FBgn0285926	CG1691	2	2	2	23.1303	23.2577	0	15.4627	0	0	0	0	15.4627	0.11612
205	sp|A0A0B4K7J2|RBP2_DROME	A0A0B4K7J2	Nup358	FBgn0039302	CG11856	2	2	2	23.0441	0	23.2863	15.4435	0	0	0	0	15.4435	0.116127
206	tr|Q9VV38|Q9VV38_DROME	Q9VV38	Dmel\CG4998	FBgn0036612	CG4998	2	2	2	23.212	0	23.0869	15.433	0	0	0	0	15.433	0.116119
207	tr|A0A0B4K7V5|A0A0B4K7V5_DROME	A0A0B4K7V5	Pdk	FBgn0017558	CG8808	3	3	3	23.2153	0	23.0217	15.4123	0	0	0	0	15.4123	0.116123
208	sp|P23128|DDX6_DROME	P23128	me31B	FBgn0004419	CG4916	3	3	3	0	23.3396	22.7863	15.3753	0	0	0	0	15.3753	0.116174
209	tr|Q8T0I9|Q8T0I9_DROME	Q8T0I9	Tsp	FBgn0031850	CG11326	2	2	2	23.9653	23.2054	23.2212	23.464	0	0	24.3766	8.12554	15.3384	0.132241
210	tr|Q9W4U2|Q9W4U2_DROME	Q9W4U2	BcDNA:RH09070	FBgn0029648	CG3603	3	3	3	22.954	0	22.683	15.2123	0	0	0	0	15.2123	0.116131
211	tr|E2QD63|E2QD63_DROME	E2QD63	HIP-R	FBgn0029676	CG2947	2	2	2	22.8782	22.5474	0	15.1419	0	0	0	0	15.1419	0.116138
212	tr|A0A6H2EG56|A0A6H2EG56_DROME	A0A6H2EG56	Tm1	FBgn0003721	CG4898	4	4	4	23.7196	23.16	23.4581	23.4459	0	0	24.9213	8.30711	15.1388	0.142538
213	tr|Q9V9A9|Q9V9A9_DROME	Q9V9A9	hlk	FBgn0010482	CG9432	37	37	20	28.3084	28.6545	28.8009	28.588	0	27.5825	28.2474	18.61	9.97796	0.344106
214	tr|Q9W2J5|Q9W2J5_DROME	Q9W2J5	Dmel\CG44245	FBgn0265180	CG44245	17	17	17	26.7469	28.6923	26.3425	27.2605	25.5612	27.7557	0	17.7723	9.48823	0.348287
215	sp|Q9VEN1|FLNA_DROME	Q9VEN1	cher	FBgn0014141	CG3937	24	24	24	25.4723	27.0221	25.4978	25.9974	0	24.4881	25.1561	16.5481	9.44936	0.318078
216	sp|P07486|G3P1_DROME	P07486	Gapdh1	FBgn0001091	CG12055	11	2	2	28.5658	0	28.0277	18.8645	0	0	28.4062	9.46872	9.39575	0.520837
217	tr|Q7KV34|Q7KV34_DROME	Q7KV34	pkm	FBgn0030317	CG1561	17	17	17	0	27.1145	26.4595	17.858	0	0	25.4215	8.47383	9.38417	0.488387
218	tr|M9PF16|M9PF16_DROME	M9PF16	beta-Spec	FBgn0250788	CG5870	39	39	39	26.5842	27.4941	27.6958	27.2581	0	26.3784	27.2436	17.874	9.38406	0.353439
219	sp|P13395|SPTCA_DROME	P13395	alpha-Spec	FBgn0250789	CG1977	43	43	43	26.1211	27.4482	27.6875	27.0856	0	26.2151	27.0508	17.7553	9.33029	0.353367
220	tr|Q7KN75|Q7KN75_DROME	Q7KN75	Dp1	FBgn0027835	CG5170	20	20	20	26.5792	27.2148	26.6902	26.8281	0	26.1349	26.5546	17.5632	9.26491	0.351064
221	tr|X2JD89|X2JD89_DROME	X2JD89	bt	FBgn0005666	CG32019	47	47	47	26.6333	26.5298	26.3659	26.5097	0	24.5246	27.2805	17.2683	9.24132	0.346587
222	tr|A0A0B4JD95|A0A0B4JD95_DROME	A0A0B4JD95	zip	FBgn0287873	CG15792	19	19	19	0	25.1451	26.6649	17.27	0	24.2219	0	8.07397	9.19604	0.480358
223	tr|M9PDW8|M9PDW8_DROME	M9PDW8	CG3950	FBgn0085446	CG34417	28	28	28	25.5111	26.6922	26.5025	26.2353	0	25.5617	25.699	17.0869	9.14837	0.344966
224	tr|Q9VM07|Q9VM07_DROME	Q9VM07	Dmel\CG6055	FBgn0031918	CG6055	5	4	4	26.9523	25.2634	26.5355	26.2504	0	26.1979	25.3854	17.1944	9.05596	0.352505
225	tr|Q9VJZ1|Q9VJZ1_DROME	Q9VJZ1	anon-WO0118547.80	FBgn0032514	CG9302	11	11	11	25.4514	26.3675	25.7389	25.8526	0	24.5728	26.0321	16.8683	8.9843	0.347554
226	tr|B7YZQ7|B7YZQ7_DROME	B7YZQ7	Nurf-38	FBgn0016687	CG4634	10	10	10	26.1393	26.3884	26.217	26.2482	0	25.4258	26.5045	17.3101	8.9381	0.360382
227	tr|Q9VUN9|Q9VUN9_DROME	Q9VUN9	Dmel\CG7857	FBgn0026738	CG7857	9	9	9	25.9093	25.9576	25.8776	25.9148	25.7069	0	25.2775	16.9948	8.91999	0.353125
228	sp|P15348|TOP2_DROME	P15348	Top2	FBgn0284220	CG10223	21	21	21	26.0823	27.1066	26.7676	26.6522	0	26.5809	26.6281	17.7363	8.91583	0.371848
229	tr|E1JJF9|E1JJF9_DROME	E1JJF9	Nrg	FBgn0264975	CG1634	11	11	11	26.0646	25.9518	25.9056	25.974	0	25.43	25.7675	17.0658	8.90817	0.355468
230	tr|A1Z8Z3|A1Z8Z3_DROME	A1Z8Z3	Cpr49Ag	FBgn0033730	CG8511	2	2	2	26.6974	0	26.1128	17.6034	26.1354	0	0	8.7118	8.89159	0.512503
231	tr|A0A0C4DHE8|A0A0C4DHE8_DROME	A0A0C4DHE8	RpS29	FBgn0261599	CG8495	3	3	3	26.5196	26.2391	26.4589	26.4059	0	26.2129	26.3878	17.5336	8.8723	0.368792
232	tr|Q9VNC3|Q9VNC3_DROME	Q9VNC3	Hcs	FBgn0037332	CG14670	7	7	7	25.6806	0	24.7772	16.8193	0	0	23.9427	7.9809	8.83836	0.488439
233	tr|Q9VFR2|Q9VFR2_DROME	Q9VFR2	Dmel\CG9297	FBgn0038181	CG9297	8	8	8	26.4136	26.0444	25.4703	25.9761	0	25.5363	25.8983	17.1449	8.83122	0.361387
234	tr|X2JAW6|X2JAW6_DROME	X2JAW6	LanB2	FBgn0267348	CG3322	38	38	38	26.2824	27.8845	27.7985	27.3218	0	27.6584	27.8144	18.4909	8.83091	0.394268
235	sp|O18404|HCD2_DROME	O18404	scu	FBgn0021765	CG7113	6	6	6	25.5893	25.3592	25.4398	25.4628	0	25.1506	24.7757	16.6421	8.82065	0.348942
236	tr|Q0E980|Q0E980_DROME	Q0E980	Dmel\CG8547	FBgn0033919	CG8547	9	9	9	25.731	25.5084	25.7165	25.652	0	24.9761	25.5268	16.8343	8.81767	0.354047
237	tr|M9NH51|M9NH51_DROME	M9NH51	U2af50	FBgn0005411	CG9998	7	7	7	25.5655	26.1908	26.2201	25.9921	0	25.522	26.1243	17.2154	8.7767	0.365774
238	sp|P17886|CRN_DROME	P17886	crn	FBgn0000377	CG3193	11	11	11	25.664	26.3561	25.5612	25.8604	0	25.4217	25.8608	17.0942	8.76626	0.363263
239	tr|M9MRN8|M9MRN8_DROME	M9MRN8	Dmel\CG42713	FBgn0261630	CG42713	2	2	2	0	25.708	24.1326	16.6135	0	0	23.6234	7.87448	8.73903	0.488032
240	tr|Q8IP94|Q8IP94_DROME	Q8IP94	ThrRS	FBgn0027081	CG5353	12	12	12	25.5591	25.6159	25.6696	25.6149	0	24.8936	25.7535	16.8824	8.73249	0.359528
241	tr|A0A0B4KHM9|A0A0B4KHM9_DROME	A0A0B4KHM9	Pxd	FBgn0004577	CG3477	14	14	14	26.9306	26.3205	25.8797	26.3769	26.812	26.1794	0	17.6638	8.71309	0.380063
242	tr|A0A0B4KH34|A0A0B4KH34_DROME	A0A0B4KH34	AnxB9	FBgn0000083	CG5730	9	9	9	25.8482	26.3314	26.1253	26.1016	0	25.9441	26.2445	17.3962	8.70544	0.373616
243	tr|Q9VZI1|Q9VZI1_DROME	Q9VZI1	Chd64	FBgn0035499	CG14996	6	6	6	25.8213	24.952	25.1391	25.3041	0	24.8702	24.9346	16.6016	8.70253	0.353841
244	tr|M9NE68|M9NE68_DROME	M9NE68	Hsp23	FBgn0001224	CG4463	4	4	4	25.5762	25.8897	25.5182	25.6614	0	25.3255	25.5771	16.9676	8.69381	0.363459
245	tr|Q9VSY0|Q9VSY0_DROME	Q9VSY0	Cpr67B	FBgn0035985	CG3672	7	7	7	26.7818	24.5828	26.8687	26.0778	26.6898	0	25.5027	17.3975	8.68028	0.376725
246	tr|Q9W4Y3|Q9W4Y3_DROME	Q9W4Y3	trol	FBgn0284408	CG33950	15	15	15	26.1977	0	25.605	17.2676	0	0	25.7902	8.59672	8.67083	0.516014
247	tr|Q9VJ74|Q9VJ74_DROME	Q9VJ74	Dmel\CG10333	FBgn0032690	CG10333	14	14	14	25.3527	25.8386	25.4889	25.5601	0	25.0426	25.628	16.8902	8.66989	0.362773
248	tr|Q9V4D4|Q9V4D4_DROME	Q9V4D4	Taf3	FBgn0026262	CG2009	13	13	13	25.831	26.4064	26.0903	26.1092	0	26.1526	26.1794	17.444	8.66522	0.376783
249	sp|P35416|MYSP2_DROME	P35416	Prm	FBgn0003149	CG5939	19	4	4	25.8438	24.8813	25.0255	25.2502	0	24.629	25.131	16.5867	8.66353	0.355507
250	tr|Q9W1B9|Q9W1B9_DROME	Q9W1B9	RpL12	FBgn0034968	CG3195	4	4	4	25.2333	24.9321	25.4162	25.1939	0	24.9044	24.8632	16.5892	8.60465	0.358214
251	tr|Q9VAX8|Q9VAX8_DROME	Q9VAX8	Dmel\CG4849	FBgn0039566	CG4849	15	15	15	24.6522	26.1387	25.0015	25.2641	0	24.4588	25.5717	16.6768	8.58728	0.362216
252	tr|X2JB25|X2JB25_DROME	X2JB25	Yp2	FBgn0005391	CG2979	6	6	5	25.1665	25.9671	25.8914	25.675	0	25.7225	25.5897	17.1041	8.57095	0.373148
253	tr|A0A0B4LFD2|A0A0B4LFD2_DROME	A0A0B4LFD2	Hsc70-5	FBgn0001220	CG8542	8	8	8	25.3789	25.258	25.1834	25.2734	0	24.8683	25.2418	16.7034	8.57005	0.362867
254	tr|X2J8Y6|X2J8Y6_DROME	X2J8Y6	Acp36DE	FBgn0011559	CG7157	5	5	5	25.8762	0	23.9346	16.6036	0	0	24.1047	8.0349	8.56872	0.499947
255	sp|O18334|RAB6_DROME	O18334	Rab6	FBgn0015797	CG6601	3	3	3	25.7227	25.6409	25.8505	25.738	25.8409	0	25.6744	17.1718	8.56624	0.374902
256	tr|Q9VAA9|Q9VAA9_DROME	Q9VAA9	Jasper	FBgn0039743	CG7946	8	8	8	25.4009	25.2342	25.3019	25.3123	0	24.9269	25.3761	16.7677	8.54467	0.365802
257	tr|Q9VCN3|Q9VCN3_DROME	Q9VCN3	bb8	FBgn0039071	CG4434	8	8	8	25.1854	0	24.3664	16.5173	0	0	23.9754	7.99178	8.5255	0.499463
258	tr|Q9V470|Q9V470_DROME	Q9V470	ScsbetaG	FBgn0029118	CG10622	6	6	6	25.0971	24.8328	25.0135	24.9811	0	24.6693	24.7339	16.4677	8.51343	0.35959
259	sp|Q9V3S0|CP4G1_DROME	Q9V3S0	Cyp4g1	FBgn0010019	CG3972	7	7	7	25.5303	0	23.6878	16.406	0	0	23.7784	7.92612	8.47992	0.498961
260	tr|Q0E924|Q0E924_DROME	Q0E924	Phb2	FBgn0010551	CG15081	8	8	8	26.3046	25.5248	25.6705	25.8333	26.0444	26.0537	0	17.366	8.46726	0.384865
261	tr|A1Z8Y3|A1Z8Y3_DROME	A1Z8Y3	Cpr49Ab	FBgn0050042	CG30042	3	3	3	23.9942	0	25.8499	16.6147	0	0	24.4595	8.15315	8.46156	0.507943
262	tr|A1ZBB4|A1ZBB4_DROME	A1ZBB4	hnRNP U	FBgn0050122	CG30122	12	12	12	24.3038	25.9789	26.3311	25.538	0	25.2007	26.0322	17.0776	8.46033	0.379182
263	tr|Q9VK59|Q9VK59_DROME	Q9VK59	Dmel\CG5787	FBgn0032454	CG5787	16	16	16	24.9939	25.685	25.5129	25.3973	0	25.789	25.0883	16.9591	8.43816	0.376252
264	tr|A0A0B4KEI0|A0A0B4KEI0_DROME	A0A0B4KEI0	COX4L	FBgn0033020	CG10396	4	4	4	25.3716	0	24.6743	16.682	0	0	24.7394	8.24646	8.43551	0.511862
265	tr|Q9I7R0|Q9I7R0_DROME	Q9I7R0	Apt1	FBgn0042138	CG18815	6	6	6	25.6	24.8625	25.4828	25.3151	0	25.415	25.2247	16.8799	8.43521	0.374309
266	tr|X2JFW6|X2JFW6_DROME	X2JFW6	Dmel\CG8289	FBgn0030854	CG8289	5	5	5	0	25.5008	25.2742	16.925	0	25.4907	0	8.49689	8.42813	0.520932
267	sp|P11046|LAMB1_DROME	P11046	LanB1	FBgn0261800	CG7123	25	25	25	25.3112	26.9665	26.7642	26.3473	0	27.0458	26.7892	17.945	8.40229	0.402794
268	tr|Q9V455|Q9V455_DROME	Q9V455	Kap-alpha3	FBgn0027338	CG9423	7	7	7	24.9595	24.9183	24.8361	24.9047	24.7179	0	24.7926	16.5035	8.40116	0.366204
269	tr|Q9V9M7|Q9V9M7_DROME	Q9V9M7	RpL21	FBgn0032987	CG12775	4	4	4	25.4732	25.6617	25.3575	25.4975	0	25.7389	25.5759	17.105	8.3925	0.382037
270	tr|C8VV14|C8VV14_DROME	C8VV14	Ald1	FBgn0000064	CG6058	11	11	11	25.7399	25.2561	25.0969	25.3643	0	25.2091	25.7097	16.9729	8.39139	0.378911
271	tr|Q9VJ19|Q9VJ19_DROME	Q9VJ19	RpL30	FBgn0086710	CG10652	3	3	3	0	25.5922	25.7146	17.1023	0	0	26.1506	8.71687	8.38541	0.530004
272	sp|P21914|SDHB_DROME	P21914	SdhB	FBgn0014028	CG3283	4	4	4	25.4068	0	25.0865	16.8311	0	0	25.406	8.46866	8.36244	0.52227
273	sp|P54359|SEPT2_DROME	P54359	Septin2	FBgn0014029	CG4173	7	7	7	25.1409	0	25.2209	16.7873	0	0	25.3094	8.43646	8.3508	0.521543
274	tr|Q9VRP3|Q9VRP3_DROME	Q9VRP3	Txl	FBgn0035631	CG5495	5	5	5	24.7227	24.9626	24.5927	24.7593	0	24.7324	24.523	16.4185	8.34087	0.367121
275	tr|A0A6F7U5U6|A0A6F7U5U6_DROME	A0A6F7U5U6	pyd	FBgn0262614	CG43140	13	13	13	24.6524	25.0609	24.8244	24.8459	0	24.7047	24.8165	16.5071	8.33887	0.369532
276	tr|Q9V3I2|Q9V3I2_DROME	Q9V3I2	Rab5	FBgn0014010	CG3664	6	6	6	24.7853	24.6098	24.8478	24.7476	0	24.7211	24.5326	16.4179	8.32971	0.367658
277	tr|M9NF33|M9NF33_DROME	M9NF33	Cpsf6	FBgn0035872	CG7185	5	5	5	0	24.5902	24.2281	16.2728	0	0	23.9175	7.97251	8.30025	0.506602
278	sp|Q9VCK0|EI3D1_DROME	Q9VCK0	eIF3d1	FBgn0040227	CG10161	7	7	7	25.0518	25.1628	25.0449	25.0865	25.0357	0	25.3374	16.791	8.29549	0.379074
279	tr|Q9VXQ5|Q9VXQ5_DROME	Q9VXQ5	CCT6	FBgn0027329	CG8231	9	9	9	25.264	25.0321	24.7406	25.0122	0	25.0071	25.1625	16.7232	8.28902	0.377721
280	sp|P08120|CO4A1_DROME	P08120	Col4a1	FBgn0000299	CG4145	5	5	5	25.3863	24.8453	26.1507	25.4608	0	26.0286	25.4899	17.1728	8.28796	0.389571
281	tr|A4V449|A4V449_DROME	A4V449	ND-75	FBgn0017566	CG2286	10	10	10	25.192	24.2278	24.608	24.6759	0	24.6413	24.6119	16.4178	8.25818	0.371581
282	tr|Q7K3D4|Q7K3D4_DROME	Q7K3D4	zda	FBgn0034368	CG5482	6	6	6	25.0855	24.5086	24.3031	24.6324	0	24.3955	24.7394	16.3783	8.25411	0.370716
283	sp|Q9V3C0|DDX41_DROME	Q9V3C0	abs	FBgn0015331	CG14637	10	10	10	24.7094	24.6878	0	16.4658	0	0	24.637	8.21235	8.2534	0.517041
284	tr|Q76NQ0|Q76NQ0_DROME	Q76NQ0	CG5364	FBgn0053303	CG33303	9	9	9	25.4108	25.429	25.0832	25.3077	0	25.663	25.5992	17.0874	8.22028	0.3905
285	tr|Q9VI66|Q9VI66_DROME	Q9VI66	CG2640	FBgn0051248	CG31248	3	3	3	24.2412	24.0292	0	16.0901	0	0	23.6221	7.87403	8.21609	0.505929
286	tr|Q9VTK9|Q9VTK9_DROME	Q9VTK9	Akr1B	FBgn0086254	CG6084	9	9	9	24.9279	24.7425	24.4541	24.7081	0	24.1755	25.3437	16.5064	8.20171	0.377007
287	tr|Q95TZ4|Q95TZ4_DROME	Q95TZ4	anon-WO0140519.178	FBgn0037988	CG14740	4	4	4	24.4887	0	24.0838	16.1908	0	0	23.9718	7.99059	8.20024	0.510867
288	tr|X2JCP8|X2JCP8_DROME	X2JCP8	Act5C	FBgn0000042	CG4027	14	3	3	24.5751	25.8165	26.0312	25.4743	26.2901	0	25.5982	17.2961	8.17819	0.398567
289	tr|Q9VWB4|Q9VWB4_DROME	Q9VWB4	Spn77Bb	FBgn0036969	CG6663	5	5	5	24.67	0	23.9562	16.2088	0	0	24.1445	8.04818	8.16058	0.514474
290	sp|O61491|FLOT1_DROME	O61491	Flo1	FBgn0024754	CG8200	4	4	4	24.8613	24.2298	24.5374	24.5428	0	24.5176	24.6466	16.3881	8.15476	0.376074
291	tr|A0A0C4DHG9|A0A0C4DHG9_DROME	A0A0C4DHG9	Doa	FBgn0265998	CG42320	5	5	5	24.5504	24.7682	24.2471	24.5219	0	24.7018	24.404	16.3686	8.1533	0.375627
292	tr|A0A0B4KGE6|A0A0B4KGE6_DROME	A0A0B4KGE6	Rpn8	FBgn0002787	CG3416	5	5	5	0	24.5554	24.4852	16.3469	0	0	24.5895	8.1965	8.15035	0.520192
293	tr|Q59DP4|Q59DP4_DROME	Q59DP4	anon-EST:fe2A9	FBgn0250819	CG33521	7	7	7	24.8221	0	24.3441	16.3887	0	0	24.7222	8.24075	8.14799	0.5219
294	tr|Q9V4E0|Q9V4E0_DROME	Q9V4E0	ND-49	FBgn0039909	CG1970	5	5	4	24.973	24.4152	24.7016	24.6966	24.9892	0	24.663	16.5507	8.14586	0.380782
295	tr|Q8IP51|Q8IP51_DROME	Q8IP51	wb	FBgn0261563	CG42677	11	11	11	24.3663	25.0165	23.9277	24.4368	0	24.4157	24.464	16.2932	8.14357	0.374386
296	sp|A1Z9G2|SYF1_DROME	A1Z9G2	fand	FBgn0033859	CG6197	8	8	8	24.5554	25.1686	24.5825	24.7688	0	24.9983	24.8945	16.6309	8.13791	0.383293
297	tr|A0A0B4KHG5|A0A0B4KHG5_DROME	A0A0B4KHG5	chp	FBgn0267435	CG1744	10	10	10	24.5652	24.4711	24.7293	24.5885	0	24.88	24.5095	16.4632	8.12536	0.379531
298	tr|E1JJF3|E1JJF3_DROME	E1JJF3	Inx2	FBgn0027108	CG4590	6	6	6	24.974	24.8448	24.7827	24.8672	0	25.0436	25.2071	16.7502	8.11694	0.387357
299	tr|Q9VSY2|Q9VSY2_DROME	Q9VSY2	Cpsf5	FBgn0288470	CG3689	4	4	4	0	24.2958	24.3035	16.1998	0	0	24.2574	8.0858	8.11396	0.517488
300	tr|O96607|O96607_DROME	O96607	homer	FBgn0025777	CG11324	9	9	9	24.4801	24.3467	24.518	24.4483	0	24.557	24.4758	16.3443	8.10398	0.377507
301	tr|Q9VAI9|Q9VAI9_DROME	Q9VAI9	Obp99c	FBgn0039682	CG7584	3	3	3	0	24.5429	24.1598	16.2342	0	0	24.4343	8.14478	8.08945	0.520557
302	tr|Q9W5X1|Q9W5X1_DROME	Q9W5X1	aspr	FBgn0031089	CG9572	10	10	10	24.7836	0	24.7019	16.4952	0	0	25.2273	8.40908	8.08608	0.530122
303	tr|Q9VM11|Q9VM11_DROME	Q9VM11	Dmel\CG5973	FBgn0031914	CG5973	9	9	9	25.0898	25.0573	24.4583	24.8685	0	24.8683	25.4993	16.7892	8.07928	0.390561
304	tr|E1JHT6|E1JHT6_DROME	E1JHT6	Rtnl1	FBgn0053113	CG33113	5	5	5	25.1298	24.9203	24.7615	24.9372	0	25.4744	25.1158	16.8634	8.07384	0.392577
305	tr|Q7KUB0|Q7KUB0_DROME	Q7KUB0	Idh	FBgn0001248	CG7176	8	8	8	24.5161	24.4336	0	16.3166	24.7448	0	0	8.24828	8.06831	0.525055
306	tr|Q9W019|Q9W019_DROME	Q9W019	Dmel\CG15877	FBgn0035337	CG15877	3	3	3	23.9108	0	23.8995	15.9367	0	0	23.7196	7.90654	8.03021	0.51392
307	tr|A0A0B4K6A1|A0A0B4K6A1_DROME	A0A0B4K6A1	BcDNA:GH02439	FBgn0027608	CG2082	4	4	4	24.7377	24.0667	24.6173	24.4739	0	24.7902	24.5477	16.446	8.02793	0.384357
308	tr|A0A0B4KFT3|A0A0B4KFT3_DROME	A0A0B4KFT3	Pkc53E	FBgn0003091	CG6622	4	3	3	0	24.0056	23.6328	15.8794	0	0	23.5589	7.85298	8.02647	0.512063
309	tr|M9PJQ3|M9PJQ3_DROME	M9PJQ3	RhoGAPp190	FBgn0026375	CG32555	7	7	7	0	24.0614	24.1147	16.0587	0	0	24.0981	8.03271	8.02601	0.518766
310	tr|A0A0B4KHZ1|A0A0B4KHZ1_DROME	A0A0B4KHZ1	Lsd-1	FBgn0039114	CG10374	7	7	7	25.3082	24.2945	24.7859	24.7962	0	25.2868	25.0336	16.7735	8.02274	0.393218
311	tr|X2JC35|X2JC35_DROME	X2JC35	RpL36	FBgn0002579	CG7622	3	3	3	0	24.4076	24.2165	16.2081	0	24.6283	0	8.20943	7.99862	0.52623
312	tr|Q9VSK4|Q9VSK4_DROME	Q9VSK4	Dmel\CG6983	FBgn0035896	CG6983	4	4	4	24.6938	24.2896	24.5964	24.5266	24.8142	0	24.7786	16.5309	7.99572	0.388188
313	tr|Q7K188|Q7K188_DROME	Q7K188	Dmel\CG6329	FBgn0033872	CG6329	3	3	3	23.6698	24.6123	24.6522	24.3114	0	24.4251	24.5822	16.3357	7.97569	0.38446
314	tr|Q9VHL2|Q9VHL2_DROME	Q9VHL2	CCT7	FBgn0037632	CG8351	4	4	4	23.7272	23.7895	0	15.8389	0	0	23.6108	7.87026	7.96867	0.514837
315	sp|Q94901|LARK_DROME	Q94901	lark	FBgn0011640	CG8597	5	5	5	0	23.9194	24.0626	15.994	0	0	24.0832	8.02773	7.96628	0.520798
316	tr|Q9VQM2|Q9VQM2_DROME	Q9VQM2	ND-B14.5B	FBgn0031505	CG12400	4	4	4	0	23.6377	24.0803	15.906	0	0	23.8198	7.93993	7.96607	0.51757
317	tr|Q9VYQ9|Q9VYQ9_DROME	Q9VYQ9	Tango4	FBgn0030365	CG1796	5	4	4	23.9425	24.0358	0	15.9928	0	0	24.0832	8.02773	7.96506	0.520842
318	tr|A4V2B8|A4V2B8_DROME	A4V2B8	CkIIalpha	FBgn0264492	CG17520	3	3	3	23.8556	0	23.6316	15.829	0	0	23.6007	7.8669	7.96214	0.51496
319	tr|M9PG55|M9PG55_DROME	M9PG55	Dmel\CG10600	FBgn0032717	CG10600	5	5	5	0	24.3215	23.6771	15.9995	0	0	24.1366	8.04552	7.95401	0.521961
320	tr|E1JGN7|E1JGN7_DROME	E1JGN7	HnRNP-K	FBgn0267791	CG13425	3	3	3	24.5054	0	24.1745	16.2266	0	24.8425	0	8.28083	7.9458	0.530765
321	tr|Q8IPD8|Q8IPD8_DROME	Q8IPD8	Cpr30F	FBgn0051876	CG31876	5	5	5	26.4153	24.0494	25.9538	25.4729	26.7764	0	25.8074	17.5279	7.94491	0.417585
322	tr|Q9VFT4|Q9VFT4_DROME	Q9VFT4	rin	FBgn0015778	CG9412	3	3	3	24.0184	23.7921	0	15.9369	0	0	24.0197	8.00657	7.93029	0.521362
323	tr|Q7JX87|Q7JX87_DROME	Q7JX87	Prx6c	FBgn0033518	CG11765	4	4	4	0	24.1482	23.6388	15.929	0	0	24.0023	8.00077	7.92821	0.521251
324	tr|Q9VTZ5|Q9VTZ5_DROME	Q9VTZ5	Tsf2	FBgn0036299	CG10620	6	6	6	24.2834	0	23.6549	15.9794	0	0	24.1582	8.05272	7.92672	0.523241
325	tr|Q9VZC8|Q9VZC8_DROME	Q9VZC8	Dmel\CG15019	FBgn0035541	CG15019	4	4	4	0	23.944	23.8606	15.9349	0	0	24.0346	8.01155	7.9233	0.521801
326	tr|Q8IQQ9|Q8IQQ9_DROME	Q8IQQ9	Afg3l2	FBgn0036702	CG6512	3	3	3	23.6277	23.3892	0	15.6723	0	0	23.2581	7.7527	7.91958	0.512217
327	tr|Q7K012|Q7K012_DROME	Q7K012	Bap55	FBgn0025716	CG6546	5	5	5	0	23.9203	23.6758	15.8654	0	0	23.8526	7.95087	7.91449	0.519885
328	tr|Q9V3E7|Q9V3E7_DROME	Q9V3E7	Ref1	FBgn0010774	CG1101	4	4	4	24.3689	23.4395	0	15.9361	0	0	24.1207	8.04023	7.89591	0.523995
329	tr|M9NGX5|M9NGX5_DROME	M9NGX5	CG12649	FBgn0052694	CG32694	4	4	3	25.9885	24.1866	25.8343	25.3365	26.4154	25.9096	0	17.4417	7.89481	0.417503
330	tr|Q7KY08|Q7KY08_DROME	Q7KY08	AGO1	FBgn0262739	CG6671	5	5	5	0	23.576	23.703	15.7597	0	0	23.6	7.86668	7.893	0.517531
331	tr|M9NEL1|M9NEL1_DROME	M9NEL1	CanA-14F	FBgn0267912	CG9819	4	4	3	24.3812	24.3026	24.1204	24.2681	0	24.5276	24.6314	16.3863	7.88173	0.390554
332	tr|Q9VD29|Q9VD29_DROME	Q9VD29	Sar1	FBgn0038947	CG7073	4	4	4	24.292	23.4794	0	15.9238	0	0	24.1268	8.04225	7.88154	0.524583
333	tr|Q9VL71|Q9VL71_DROME	Q9VL71	Srp54	FBgn0024285	CG4602	3	3	3	0	23.7847	24.0509	15.9452	0	0	24.1935	8.06449	7.8807	0.525358
334	tr|A0A0B4LIJ0|A0A0B4LIJ0_DROME	A0A0B4LIJ0	Rpt2	FBgn0015282	CG5289	5	5	5	24.0418	24.5068	23.9308	24.1598	0	24.5585	24.2913	16.2833	7.8765	0.38823
335	sp|P12370|KAPC1_DROME	P12370	Pka-C1	FBgn0000273	CG4379	6	6	6	24.2387	24.2173	0	16.152	0	24.8697	0	8.28989	7.8621	0.53421
336	tr|Q9W3T9|Q9W3T9_DROME	Q9W3T9	Dmel\CG3040	FBgn0029925	CG3040	2	2	2	23.8541	0	23.4913	15.7818	0	0	23.768	7.92267	7.85915	0.520921
337	tr|M9PCE8|M9PCE8_DROME	M9PCE8	Acer	FBgn0016122	CG10593	6	6	6	24.1308	23.6063	0	15.9123	0	0	24.2153	8.07178	7.84056	0.527164
338	tr|Q9VEB1|Q9VEB1_DROME	Q9VEB1	Mdh2	FBgn0262559	CG7998	5	5	5	25.0783	24.4823	24.2125	24.591	0	25.1864	25.0705	16.7523	7.83867	0.402544
339	tr|Q8T0J5|Q8T0J5_DROME	Q8T0J5	Dmel\CG7675	FBgn0038610	CG7675	4	4	4	23.5522	0	23.5277	15.6933	0	0	23.568	7.85601	7.83727	0.519226
340	tr|X2JDI1|X2JDI1_DROME	X2JDI1	mts	FBgn0004177	CG7109	5	5	5	24.7559	24.6413	24.7736	24.7236	0	25.3242	25.4293	16.9178	7.8058	0.408349
341	tr|A0A0C4DHG6|A0A0C4DHG6_DROME	A0A0C4DHG6	Gel	FBgn0010225	CG1106	5	5	5	23.9318	23.995	24.4518	24.1262	24.6298	24.3566	0	16.3288	7.79739	0.393743
342	tr|A4V4I0|A4V4I0_DROME	A4V4I0	Gbeta13F	FBgn0001105	CG10545	5	5	5	24.4912	24.535	24.4611	24.4958	0	25.4024	24.7471	16.7165	7.77932	0.404787
343	tr|Q9VHX9|Q9VHX9_DROME	Q9VHX9	CD98hc	FBgn0037533	CG2791	3	3	3	23.6589	0	23.2085	15.6225	0	0	23.5311	7.84371	7.77876	0.521009
344	tr|Q9VY91|Q9VY91_DROME	Q9VY91	Pdcd4	FBgn0030520	CG10990	3	3	3	24.1622	24.0805	24.1265	24.1231	0	24.3783	24.6641	16.3474	7.77561	0.395348
345	tr|M9PEA6|M9PEA6_DROME	M9PEA6	RpS21	FBgn0015521	CG2986	2	2	2	23.7232	23.6609	0	15.7947	0	0	24.1645	8.05485	7.73985	0.530336
346	tr|M9PDK5|M9PDK5_DROME	M9PDK5	VhaSFD	FBgn0027779	CG17332	2	2	2	23.2299	22.9646	0	15.3982	0	0	22.9937	7.66456	7.7336	0.515871
347	tr|A0A0B4LFB8|A0A0B4LFB8_DROME	A0A0B4LFB8	Opa1	FBgn0261276	CG8479	3	3	3	23.3087	0	23.0329	15.4472	0	0	23.2651	7.75504	7.69215	0.520942
348	tr|Q9VTU2|Q9VTU2_DROME	Q9VTU2	ND-SGDH	FBgn0011455	CG9762	4	4	4	23.8443	22.9703	0	15.6049	0	0	23.783	7.92766	7.67723	0.528128
349	tr|Q8IR21|Q8IR21_DROME	Q8IR21	CG9216	FBgn0259700	CG42354	2	2	2	23.4619	0	22.6508	15.3709	0	0	23.1864	7.72881	7.64209	0.521953
350	tr|Q9V400|Q9V400_DROME	Q9V400	Ilk	FBgn0028427	CG10504	2	2	2	0	23.35	23.127	15.4923	0	0	23.5723	7.85744	7.63491	0.527036
351	tr|O97454|O97454_DROME	O97454	l(1)10Bb	FBgn0001491	CG1639	2	2	2	23.6487	24.6376	23.9008	24.0623	0	24.6958	24.6038	16.4332	7.62916	0.405982
352	tr|B5RIU6|B5RIU6_DROME	B5RIU6	EndoA	FBgn0038659	CG14296	3	3	3	23.5216	24.0066	0	15.8427	24.655	0	0	8.21834	7.62438	0.540754
353	tr|Q8IML5|Q8IML5_DROME	Q8IML5	Vha100-1	FBgn0028671	CG1709	4	4	4	0	23.1221	23.2744	15.4655	0	0	23.6015	7.86717	7.59833	0.528822
354	sp|Q24319|OST48_DROME	Q24319	Ost48	FBgn0014868	CG9022	4	4	4	23.0715	23.0926	0	15.388	0	0	23.3859	7.79529	7.59274	0.526319
355	tr|A0A0B4LGC6|A0A0B4LGC6_DROME	A0A0B4LGC6	l(2)k09913	FBgn0021979	CG3082	6	6	6	24.0152	23.5285	23.8791	23.8076	0	24.272	24.4017	16.2246	7.58305	0.402903
356	tr|Q8T060|Q8T060_DROME	Q8T060	AIMP2	FBgn0036515	CG12304	2	2	2	22.7082	23.043	0	15.2504	0	0	23.1239	7.70795	7.54242	0.524966
357	tr|Q8MSI2|Q8MSI2_DROME	Q8MSI2	Scp1	FBgn0020908	CG15848	6	6	6	25.1635	24.7148	23.926	24.6014	0	25.4815	25.7125	17.0646	7.53676	0.427351
358	tr|Q7JUS9|Q7JUS9_DROME	Q7JUS9	Mpcp1	FBgn0034497	CG9090	6	6	6	24.359	24.8002	24.506	24.5551	0	25.5653	25.5209	17.0287	7.52635	0.426699
359	tr|X2JEB8|X2JEB8_DROME	X2JEB8	MKP-like	FBgn0030976	CG7378	4	4	4	23.1456	23.9844	23.4424	23.5241	0	24.2353	23.931	16.0554	7.46869	0.405073
360	tr|Q9VLT3|Q9VLT3_DROME	Q9VLT3	Mcr	FBgn0267488	CG7586	4	4	4	0	23.1091	23.0151	15.3747	0	0	23.7555	7.91851	7.45623	0.536332
361	sp|Q9VTP4|R10AB_DROME	Q9VTP4	RpL10Ab	FBgn0036213	CG7283	2	2	2	0	22.8095	22.7969	15.2021	0	0	23.5306	7.84355	7.35857	0.537417
362	tr|A0A0B4KHT5|A0A0B4KHT5_DROME	A0A0B4KHT5	Syp	FBgn0038826	CG17838	16	16	3	27.3485	27.3885	27.3847	27.3739	26.8716	26.8369	26.9307	26.8797	0.494176	8.1605e-05
363	tr|A0A6M3Q7Q7|A0A6M3Q7Q7_DROME	A0A6M3Q7Q7	hts	FBgn0263391	CG43443	20	20	20	28.0281	28.157	28.0535	28.0795	27.5359	27.5966	27.6341	27.5889	0.490645	0.000546645
364	sp|Q9W0S7|SND1_DROME	Q9W0S7	Tudor-SN	FBgn0035121	CG7008	27	27	27	27.2947	27.6051	27.291	27.3969	26.4005	26.4176	26.4587	26.4256	0.971301	0.00077349
365	tr|A1Z7S3|A1Z7S3_DROME	A1Z9E3	Rab32	FBgn0002567	CG8024	15	15	15	27.3161	27.5279	27.5941	27.4794	26.8162	26.8405	26.9663	26.8743	0.605042	0.00322314
366	tr|A0A0B4K7G4|A0A0B4K7G4_DROME	A0A0B4K7G4	mod	FBgn0002780	CG2050	13	13	13	27.123	27.071	27.0144	27.0694	26.8443	26.874	26.8761	26.8648	0.204656	0.00343664
367	tr|A4V3Q6|A4V3Q6_DROME	A4V3Q6	eEF1alpha2	FBgn0000557	CG1873	18	7	7	27.4665	27.9601	27.6072	27.6779	26.757	26.8021	26.7334	26.7641	0.913769	0.00351239
368	tr|C7LA75|C7LA75_DROME	C7LA75	Hsc70-4	FBgn0266599	CG4264	26	26	20	30.4902	30.5928	30.4225	30.5018	30.233	30.1443	30.2542	30.2105	0.29136	0.00823328
369	sp|P54397|FKB39_DROME	P54397	Fkbp39	FBgn0013269	CG6226	8	8	8	26.5486	26.7482	27.0477	26.7815	26.2135	25.7755	25.6692	25.8861	0.895419	0.0154247
370	tr|X2JCX8|X2JCX8_DROME	X2JCX8	RpS14b	FBgn0004404	CG1527	7	7	7	29.7394	29.844	29.6508	29.7448	29.4319	29.3007	29.5162	29.4163	0.328487	0.0173566
371	tr|Q8MZI3|Q8MZI3_DROME	Q8MZI3	BcDNA:HL07910	FBgn0035720	CG10077	16	14	14	26.6583	26.8023	26.6381	26.6996	26.4893	26.4994	26.5047	26.4978	0.20177	0.0177252
372	tr|A1Z9E3|A1Z9E3_DROME	A1Z7S3	mEFTu1	FBgn0024556	CG6050	13	13	13	28.2284	27.845	28.0547	28.0427	27.5899	27.4328	27.6895	27.5707	0.471984	0.0242159
373	tr|A0A0B4JD11|A0A0B4JD11_DROME	A0A0B4JD11	eEF1gamma	FBgn0029176	CG11901	13	13	13	27.8212	28.1639	27.7564	27.9138	27.528	27.4946	27.4658	27.4961	0.417714	0.0307579
374	sp|P53777|MLP1_DROME	P53777	Mlp60A	FBgn0259209	CG42309	5	4	4	28.2114	28.1059	27.7565	28.0246	27.6105	27.6036	27.6183	27.6108	0.413795	0.039585
375	sp|P15372|ARRA_DROME	P15372	Arr1	FBgn0000120	CG5711	18	18	18	28.4664	28.6164	28.7478	28.6102	28.151	27.8568	28.3509	28.1196	0.490603	0.0409496
376	sp|Q9V9A7|MCCB_DROME	Q9V9A7	Mccc2	FBgn0042083	CG3267	24	24	24	30.3009	30.3837	30.1287	30.2711	29.7079	29.6492	30.0951	29.8174	0.453704	0.0460407
377	tr|Q9VFV9|Q9VFV9_DROME	Q9VFV9	Droj2	FBgn0038145	CG8863	10	10	10	26.922	26.495	26.9922	26.803	26.4418	26.141	26.3206	26.3011	0.501883	0.0480424
