# Supplementary material for: Tissue-specific O-GlcNAcylation profiling identifies substrates in translational machinery in Drosophila mushroom body contributing to olfactory learning
Source: eLife. 2024 Apr 15;13:e91269. doi: 10.7554/eLife.91269 (PMC11018347; doi:10.7554/eLife.91269)
Supplement: Supplementary file 7. [file elife-91269-supp7.xlsx]

## Sheet: Sheet1
O-GlcNAcylated proteins identified by TurboID-CpOGACD from ellipsoid body of Drosophila.
NO.	Majority protein IDs	UniProtKB	Gene Symbol	FlyBase ID	Annotation Symbol	Peptides	Razor + unique peptides	Unique peptides	Log2( LFQ intensity+1)
									EB TurboID-CpOGA CD				EB TurboID-CpOGA DM				Log2 Fold Change	P Value
									1	2	3	Average	1	2	3	Average
1	tr|R9PY51|R9PY51_DROME	R9PY51	CG4588	FBgn0259713	CG42367	3	3	3	24.9078	25.4984	28.7728	26.393	0	0	0	0	26.393	2.54636e-05
2	tr|Q9VSY0|Q9VSY0_DROME	Q9VSY0	Cpr67B	FBgn0035985	CG3672	7	7	7	25.1117	26.0621	27.2634	26.1457	0	0	0	0	26.1457	1.92121e-06
3	sp|P48588|RS25_DROME	P48588	RpS25	FBgn0086472	CG6684	4	4	4	26.0934	25.2044	25.4461	25.5813	0	0	0	0	25.5813	6.94541e-08
4	tr|Q9VTR6|Q9VTR6_DROME	Q9VTR6	prc	FBgn0028573	CG5700	5	5	5	25.3322	25.1846	26.1348	25.5505	0	0	0	0	25.5505	1.06864e-07
5	tr|A0A0S0WGW8|A0A0S0WGW8_DROME	A0A0S0WGW8	l(3)mbn	FBgn0002440	CG12755	8	8	8	24.7234	24.632	25.6267	24.994	0	0	0	0	24.994	1.55921e-07
6	tr|Q9VJ19|Q9VJ19_DROME	Q9VJ19	RpL30	FBgn0086710	CG10652	3	3	3	25.3266	24.5068	24.8101	24.8812	0	0	0	0	24.8812	5.12994e-08
7	sp|P12080|ITA2_DROME	P12080	if	FBgn0001250	CG9623	10	10	10	23.8628	24.5818	26.0999	24.8482	0	0	0	0	24.8482	2.9617e-06
8	tr|M9MRN8|M9MRN8_DROME	M9MRN8	Dmel\CG42713	FBgn0261630	CG42713	2	2	2	23.8218	25.2222	24.8374	24.6271	0	0	0	0	24.6271	4.95607e-07
9	tr|O97059|O97059_DROME	O97059	Ccp84Ab	FBgn0004782	CG1252	8	8	8	23.3164	23.6261	26.5335	24.492	0	0	0	0	24.492	1.81674e-05
10	tr|X2JFR6|X2JFR6_DROME	X2JFR6	eIF2alpha	FBgn0261609	CG9946	5	5	5	24.5933	24.3375	24.1126	24.3478	0	0	0	0	24.3478	6.34821e-09
11	tr|Q7K188|Q7K188_DROME	Q7K188	Dmel\CG6329	FBgn0033872	CG6329	3	3	3	23.9264	24.544	24.2107	24.2271	0	0	0	0	24.2271	1.76656e-08
12	tr|A1Z8Y3|A1Z8Y3_DROME	A1Z8Y3	Cpr49Ab	FBgn0050042	CG30042	3	3	3	23.4548	23.5796	25.2705	24.1016	0	0	0	0	24.1016	2.08236e-06
13	tr|O97454|O97454_DROME	O97454	l(1)10Bb	FBgn0001491	CG1639	3	3	3	24.2533	24.0956	23.5869	23.9786	0	0	0	0	23.9786	2.96428e-08
14	tr|M9NFF8|M9NFF8_DROME	M9NFF8	Cdc42	FBgn0010341	CG12530	4	4	4	23.5635	24.0641	23.8833	23.837	0	0	0	0	23.837	8.52394e-09
15	tr|A0A126GV04|A0A126GV04_DROME	A0A126GV04	Syx1A	FBgn0013343	CG31136	3	3	3	23.643	24.0535	23.5418	23.7461	0	0	0	0	23.7461	1.13039e-08
16	tr|A4V201|A4V201_DROME	A4V201	Taf4	FBgn0010280	CG5444	4	4	4	23.7057	23.6158	23.451	23.5908	0	0	0	0	23.5908	5.99165e-10
17	tr|Q7KMQ0|Q7KMQ0_DROME	Q7KMQ0	Rpt1	FBgn0028687	CG1341	5	5	5	23.6487	23.3784	23.2373	23.4215	0	0	0	0	23.4215	4.22792e-09
18	tr|Q9VEA1|Q9VEA1_DROME	Q9VEA1	eIF1A	FBgn0026250	CG8053	2	2	2	23.5002	23.4796	22.9973	23.3257	0	0	0	0	23.3257	1.47723e-08
19	tr|Q7KMP8|Q7KMP8_DROME	Q7KMP8	Rpn9	FBgn0028691	CG10230	2	2	2	22.6186	22.6416	22.724	22.6614	0	0	0	0	22.6614	2.38634e-11
20	tr|Q9VRY5|Q9VRY5_DROME	Q9VRY5	Sbds	FBgn0035714	CG8549	3	3	3	22.8146	22.714	22.3645	22.631	0	0	0	0	22.631	7.91127e-09
21	tr|Q95RB2|Q95RB2_DROME	Q95RB2	Cpr49Ae	FBgn0033728	CG8505	4	4	4	27.8181	27.865	30.0645	28.5825	0	26.682	0	8.89401	19.6885	0.0920316
22	sp|P08120|CO4A1_DROME	P08120	Col4a1	FBgn0000299	CG4145	7	7	7	26.3294	26.9627	28.6119	27.3013	0	0	24.9525	8.31749	18.9838	0.0852744
23	tr|Q9VZQ7|Q9VZQ7_DROME	Q9VZQ7	Dmel\CG14961	FBgn0035439	CG14961	29	29	29	28.453	26.1918	29.2386	27.9611	0	0	27.261	9.08699	18.8742	0.107639
24	tr|A1Z8H1|A1Z8H1_DROME	A1Z8H1	Cpr47Ea	FBgn0033597	CG9079	4	4	4	0	26.9829	29.5395	18.8408	0	0	0	0	18.8408	0.11693
25	tr|Q9W4Y3|Q9W4Y3_DROME	Q9W4Y3	trol	FBgn0284408	CG33950	48	48	48	24.5967	26.1004	28.9961	26.5644	0	0	24.4202	8.14007	18.4244	0.089068
26	tr|Q7K0W4|Q7K0W4_DROME	Q7K0W4	Vajk4	FBgn0050101	CG30101	9	9	9	0	25.3426	28.6551	17.9992	0	0	0	0	17.9992	0.117611
27	tr|Q9VSN3|Q9VSN3_DROME	Q9VSN3	Cpr66D	FBgn0052029	CG32029	9	9	9	0	25.0634	28.575	17.8795	0	0	0	0	17.8795	0.117818
28	tr|A0A0B4KHM9|A0A0B4KHM9_DROME	A0A0B4KHM9	Pxd	FBgn0004577	CG3477	14	14	14	25.019	23.6757	28.5491	25.748	0	0	24.6944	8.23147	17.5165	0.104172
29	tr|Q9W5X1|Q9W5X1_DROME	Q9W5X1	aspr	FBgn0031089	CG9572	12	12	12	0	25.1441	27.1714	17.4385	0	0	0	0	17.4385	0.116713
30	tr|A1Z7V1|A1Z7V1_DROME	A1Z7V1	brp	FBgn0259246	CG42344	21	21	21	0	24.415	27.4946	17.3032	0	0	0	0	17.3032	0.117515
31	tr|A0A0C4DHE8|A0A0C4DHE8_DROME	A0A0C4DHE8	RpS29	FBgn0261599	CG8495	3	3	3	26.1503	26.0563	25.8193	26.0086	0	0	26.2159	8.73863	17.27	0.119325
32	tr|M9PEJ8|M9PEJ8_DROME	M9PEJ8	rhea	FBgn0260442	CG6831	28	28	28	23.2254	25.0523	26.7005	24.9927	0	0	23.4908	7.83027	17.1625	0.0953796
33	sp|Q9VHP0|DDX3_DROME	Q9VHP0	bel	FBgn0263231	CG9748	12	12	12	24.6916	24.7937	25.9555	25.1469	0	0	24.4884	8.16279	16.9841	0.106249
34	tr|M9MSI3|M9MSI3_DROME	M9MSI3	Vajk1	FBgn0028938	CG16886	7	7	7	0	23.9533	26.9702	16.9745	0	0	0	0	16.9745	0.117511
35	tr|A0A0B4JD95|A0A0B4JD95_DROME	A0A0B4JD95	zip	FBgn0287873	CG15792	17	17	17	24.0011	25.208	25.4176	24.8756	0	0	23.8428	7.94759	16.928	0.100584
36	tr|A0A0B4LFL3|A0A0B4LFL3_DROME	A0A0B4LFL3	eEF1beta	FBgn0028737	CG6341	5	5	5	25.3402	25.0724	25.1796	25.1974	0	24.9634	0	8.32115	16.8763	0.112465
37	tr|A0A0B4LHS1|A0A0B4LHS1_DROME	A0A0B4LHS1	Mlc1	FBgn0002772	CG5596	3	3	3	0	25.2745	25.3389	16.8712	0	0	0	0	16.8712	0.116117
38	tr|A0A0B4K6U6|A0A0B4K6U6_DROME	A0A0B4K6U6	sqd	FBgn0263396	CG16901	5	5	5	0	24.652	25.9536	16.8685	0	0	0	0	16.8685	0.11638
39	tr|Q9VB86|Q9VB86_DROME	Q9VB86	TwdlT	FBgn0029170	CG5812	5	5	3	24.4588	0	25.9954	16.818	0	0	0	0	16.818	0.116485
40	tr|Q9VZJ2|Q9VZJ2_DROME	Q9VZJ2	Dmel\CG1136	FBgn0035490	CG1136	4	4	4	0	23.9638	26.4823	16.8154	0	0	0	0	16.8154	0.117107
41	tr|Q9VV95|Q9VV95_DROME	Q9VV95	Dmel\CG13026	FBgn0036656	CG13026	2	2	2	0	24.8795	24.7778	16.5524	0	0	0	0	16.5524	0.116118
42	tr|Q9VL01|Q9VL01_DROME	Q9VL01	c-SPH35	FBgn0032213	CG5390	7	7	7	0	24.1033	25.5498	16.551	0	0	0	0	16.551	0.116454
43	tr|M9NH51|M9NH51_DROME	M9NH51	U2af50	FBgn0005411	CG9998	6	6	6	25.0737	24.4422	24.6223	24.7127	0	0	24.5277	8.17589	16.5368	0.113226
44	tr|M9NGX5|M9NGX5_DROME	M9NGX5	CG12649	FBgn0052694	CG32694	4	4	4	24.4381	24.8777	0	16.4386	0	0	0	0	16.4386	0.116148
45	tr|X2JDD7|X2JDD7_DROME	X2JDD7	Tig	FBgn0011722	CG11527	26	26	26	0	22.5049	26.7475	16.4175	0	0	0	0	16.4175	0.11906
46	tr|X2JDI1|X2JDI1_DROME	X2JDI1	mts	FBgn0004177	CG7109	5	5	5	24.6214	24.3226	24.3817	24.4419	24.1456	0	0	8.04854	16.3934	0.111363
47	tr|Q9VHC3|Q9VHC3_DROME	Q9VHC3	by	FBgn0000244	CG9379	9	9	9	0	24.127	25.0313	16.3861	0	0	0	0	16.3861	0.116251
48	tr|Q9VTV3|Q9VTV3_DROME	Q9VTV3	Ak1	FBgn0022709	CG17146	3	3	3	0	24.6537	24.441	16.3649	0	0	0	0	16.3649	0.116124
49	tr|X2JEB8|X2JEB8_DROME	X2JEB8	MKP-like	FBgn0030976	CG7378	4	4	4	0	24.4561	24.6369	16.3643	0	0	0	0	16.3643	0.116122
50	tr|A0A0B4K7H5|A0A0B4K7H5_DROME	A0A0B4K7H5	Mmp1	FBgn0035049	CG4859	6	6	6	24.742	24.5489	24.4939	24.5949	0	0	24.8386	8.27953	16.3154	0.120103
51	sp|Q9GU68|IF5A_DROME	Q9GU68	eEF5	FBgn0285952	CG3186	3	3	3	0	24.5472	24.2947	16.2806	0	0	0	0	16.2806	0.116127
52	sp|Q9VSL3|SEPIA_DROME	Q9VSL3	se	FBgn0086348	CG6781	5	5	5	24.5165	24.3045	24.3583	24.3931	0	0	24.398	8.13267	16.2604	0.116205
53	tr|X2JE30|X2JE30_DROME	X2JE30	mys	FBgn0004657	CG1560	6	6	6	0	23.6901	24.749	16.1464	0	0	0	0	16.1464	0.116307
54	tr|A1Z9M5|A1Z9M5_DROME	A1Z9M5	Sdb	FBgn0050069	CG30069	14	14	14	0	24.1323	24.2315	16.1213	0	0	0	0	16.1213	0.116118
55	tr|A0A0B4KFP1|A0A0B4KFP1_DROME	A0A0B4KFP1	Dmel\CG12814	FBgn0037796	CG12814	7	7	7	0	23.1967	25.1593	16.1186	0	0	0	0	16.1186	0.116771
56	tr|Q9V3Y5|Q9V3Y5_DROME	Q9V3Y5	BcDNA.LD23634	FBgn0028474	CG4119	8	8	8	23.9829	24.3079	23.9972	24.096	0	0	23.9336	7.97785	16.1182	0.113474
57	tr|Q95SZ9|Q95SZ9_DROME	Q95SZ9	mub	FBgn0262737	CG7437	4	4	4	23.8478	0	24.4592	16.1023	0	0	0	0	16.1023	0.11618
58	tr|Q8IQW2|Q8IQW2_DROME	Q8IQW2	COX6B	FBgn0031066	CG14235	3	3	3	24.2372	24.0067	24.4285	24.2242	0	0	24.3758	8.12526	16.0989	0.11865
59	tr|Q8IQQ9|Q8IQQ9_DROME	Q8IQQ9	Afg3l2	FBgn0036702	CG6512	4	4	4	0	24.2503	23.9237	16.058	0	0	0	0	16.058	0.116135
60	sp|Q8T8R1|CNBP_DROME	Q8T8R1	CNBP	FBgn0034802	CG3800	2	2	2	0	24.3086	23.7948	16.0345	0	0	0	0	16.0345	0.116162
61	tr|Q7K304|Q7K304_DROME	Q7K304	Drep2	FBgn0028408	CG1975	6	6	6	23.7897	24.2058	23.964	23.9865	0	0	23.91	7.97001	16.0165	0.114882
62	tr|O61380|O61380_DROME	O61380	eIF4G1	FBgn0023213	CG10811	10	10	10	24.0971	23.9129	23.9187	23.9762	0	0	23.9192	7.97305	16.0032	0.11518
63	tr|E1JIC6|E1JIC6_DROME	E1JIC6	CT34848	FBgn0035497	CG14995	5	5	5	23.7433	23.3034	23.5913	23.546	0	0	22.7652	7.5884	15.9576	0.103351
64	sp|Q9W445|MCTS1_DROME	Q9W445	MCTS1	FBgn0029833	CG5941	5	5	5	23.8873	23.9892	23.8585	23.9117	0	0	23.867	7.95568	15.956	0.115379
65	tr|Q9VWD0|Q9VWD0_DROME	Q9VWD0	parvin	FBgn0052528	CG32528	4	4	4	0	23.3187	24.5044	15.941	0	0	0	0	15.941	0.116361
66	tr|M9PFK6|M9PFK6_DROME	M9PFK6	Fbp1	FBgn0000639	CG17285	13	13	13	25.2035	24.7966	25.2666	25.0889	0	0	27.4694	9.15647	15.9324	0.156876
67	tr|A0A0B4LGV6|A0A0B4LGV6_DROME	A0A0B4LGV6	Ibf1	FBgn0037670	CG8436	4	4	4	0	23.9213	23.8293	15.9169	0	0	0	0	15.9169	0.116118
68	tr|M9PCE8|M9PCE8_DROME	M9PCE8	Acer	FBgn0016122	CG10593	6	6	6	23.8198	0	23.7715	15.8638	0	0	0	0	15.8638	0.116117
69	sp|Q9U4L6|TO401_DROME	Q9U4L6	Tom40	FBgn0016041	CG12157	4	4	4	24.0382	23.5447	0	15.861	0	0	0	0	15.861	0.116159
70	tr|M9PGQ6|M9PGQ6_DROME	M9PGQ6	Bx42	FBgn0004856	CG8264	4	4	4	0	23.9174	23.6059	15.8411	0	0	0	0	15.8411	0.116134
71	sp|Q9NHA8|BGBP3_DROME	Q9NHA8	GNBP3	FBgn0040321	CG5008	3	3	3	23.6541	24.0245	23.5801	23.7529	23.7549	0	0	7.9183	15.8346	0.116189
72	tr|Q9W1G7|Q9W1G7_DROME	Q9W1G7	Nap1	FBgn0015268	CG5330	3	3	3	24.5427	23.5875	23.4368	23.8557	0	24.2867	0	8.09555	15.7601	0.123667
73	tr|D1FYT3|D1FYT3_DROME	D1FYT3	Obp99b	FBgn0039685	CG7592	2	2	2	23.8132	0	23.4629	15.7587	0	0	0	0	15.7587	0.116138
74	tr|E2QC83|E2QC83_DROME	E2QC83	Pabp2	FBgn0005648	CG2163	2	2	2	23.6066	23.7817	23.4158	23.6014	0	0	23.6333	7.87778	15.7236	0.11668
75	tr|Q9VVZ4|Q9VVZ4_DROME	Q9VVZ4	Dmel\CG14095	FBgn0036870	CG14095	2	2	2	23.9565	23.8277	23.762	23.8488	24.3966	0	0	8.13221	15.7165	0.125442
76	tr|E1JGN7|E1JGN7_DROME	E1JGN7	HnRNP-K	FBgn0267791	CG13425	4	4	4	23.8367	23.7071	23.694	23.746	0	0	24.1491	8.0497	15.6963	0.122973
77	sp|Q9V4N3|CYB5_DROME	Q9V4N3	Cyt-b5	FBgn0264294	CG2140	3	3	3	0	23.6025	23.4473	15.6833	0	0	0	0	15.6833	0.116121
78	tr|X2JE34|X2JE34_DROME	X2JE34	eIF4H1	FBgn0262734	CG4429	4	4	4	0	23.1177	23.8788	15.6655	0	0	0	0	15.6655	0.116221
79	sp|Q9W4X7|EI3G1_DROME	Q9W4X7	eIF3g1	FBgn0029629	CG8636	3	3	3	23.4283	0	23.5523	15.6602	0	0	0	0	15.6602	0.116119
80	tr|A0A0B4LGC6|A0A0B4LGC6_DROME	A0A0B4LGC6	l(2)k09913	FBgn0021979	CG3082	2	2	2	0	23.5055	23.443	15.6495	0	0	0	0	15.6495	0.116117
81	tr|Q7K7G0|Q7K7G0_DROME	Q7K7G0	deltaCOP	FBgn0028969	CG14813	6	6	6	23.6559	23.3309	23.499	23.4953	0	0	23.7756	7.92518	15.5701	0.12093
82	tr|A8JNR2|A8JNR2_DROME	A8JNR2	IRSp53	FBgn0052082	CG32082	3	3	3	0	23.3063	23.2713	15.5259	0	0	0	0	15.5259	0.116117
83	tr|P92181|P92181_DROME	P92181	Lcp65Ac	FBgn0020642	CG6956	3	3	3	0	22.9977	23.5651	15.5209	0	0	0	0	15.5209	0.116176
84	tr|Q8IMC1|Q8IMC1_DROME	Q8IMC1	Gat	FBgn0039915	CG1732	4	4	4	23.3033	23.3202	23.1493	23.2576	0	0	23.3453	7.78177	15.4758	0.117628
85	tr|Q9VXC9|Q9VXC9_DROME	Q9VXC9	SP99	FBgn0030773	CG9676	4	4	4	23.297	23.2406	23.0719	23.2032	23.1826	0	0	7.72754	15.4756	0.115775
86	sp|Q9VE00|C12A4_DROME	Q9VE00	Cyp12a4	FBgn0038681	CG6042	3	3	3	0	23.2989	23.127	15.4753	0	0	0	0	15.4753	0.116122
87	tr|Q9VNA3|Q9VNA3_DROME	Q9VNA3	BEST:LD29996	FBgn0037312	CG11999	2	2	2	0	23.4002	22.9946	15.4649	0	0	0	0	15.4649	0.116147
88	tr|Q95RF6|Q95RF6_DROME	Q95RF6	Tom20	FBgn0036928	CG7654	3	3	3	0	23.2429	22.858	15.367	0	0	0	0	15.367	0.116144
89	tr|A4V441|A4V441_DROME	A4V441	sn	FBgn0003447	CG32858	3	3	3	23.4696	23.274	23.1743	23.306	0	0	23.8738	7.95793	15.348	0.126028
90	sp|Q9VF27|NDUS8_DROME	Q9VF27	ND-23	FBgn0017567	CG3944	2	2	2	0	22.7462	23.015	15.2537	0	0	0	0	15.2537	0.11613
91	sp|O18373|SPS1_DROME	O18373	Sps1	FBgn0261270	CG8553	3	3	3	22.9136	23.0458	22.9443	22.9679	23.179	0	0	7.72633	15.2416	0.119805
92	sp|P04388|RAS2_DROME	P04388	Ras64B	FBgn0003206	CG1167	3	3	3	0	22.8399	22.8167	15.2188	0	0	0	0	15.2188	0.116117
93	tr|A0A0B4K813|A0A0B4K813_DROME	A0A0B4K813	RhoGAP100F	FBgn0039883	CG1976	3	3	3	0	22.817	22.816	15.211	0	0	0	0	15.211	0.116117
94	sp|P24014|SLIT_DROME	P24014	sli	FBgn0264089	CG43758	5	5	5	23.2135	22.4059	0	15.2065	0	0	0	0	15.2065	0.116241
95	tr|Q9VXR5|Q9VXR5_DROME	Q9VXR5	Dmel\CG9281	FBgn0030672	CG9281	4	4	4	0	22.9729	22.6446	15.2058	0	0	0	0	15.2058	0.116137
96	tr|Q9VN86|Q9VN86_DROME	Q9VN86	Sccpdh1	FBgn0037298	CG2604	5	5	5	22.8881	22.8419	22.9573	22.8958	23.2047	0	0	7.73489	15.1609	0.121548
97	sp|P40946|ARF6_DROME	P40946	Arf51F	FBgn0013750	CG8156	2	2	2	0	22.7213	22.7044	15.1419	0	0	0	0	15.1419	0.116117
98	sp|Q9V9S8|HEMH_DROME	Q9V9S8	FeCh	FBgn0266268	CG2098	3	3	3	0	22.6858	22.568	15.0846	0	0	0	0	15.0846	0.116119
99	sp|Q94915|REG2_DROME	Q94915	Reg-2	FBgn0016715	CG3200	4	4	4	0	22.7948	22.2664	15.0204	0	0	0	0	15.0204	0.116171
100	sp|P40421|RDGC_DROME	P40421	rdgC	FBgn0265959	CG44746	2	2	2	0	22.4521	22.3618	14.9379	0	0	0	0	14.9379	0.116118
101	tr|Q8IR21|Q8IR21_DROME	Q8IR21	CG9216	FBgn0259700	CG42354	2	2	2	0	22.4137	22.3741	14.9293	0	0	0	0	14.9293	0.116117
102	tr|M9PIA6|M9PIA6_DROME	M9PIA6	Mi-2	FBgn0262519	CG8103	3	3	3	0	22.5031	22.212	14.9051	0	0	0	0	14.9051	0.116133
103	tr|A1ZA73|A1ZA73_DROME	A1ZA73	Strn-Mlck	FBgn0265045	CG44162	28	28	28	23.0626	24.0643	25.0366	24.0545	0	0	29.0314	9.67713	14.3774	0.212186
104	tr|Q5U126|Q5U126_DROME	Q5U126	CG7072	FBgn0250833	CG34461	5	5	5	27.2642	26.8567	29.6229	27.9146	24.7698	0	26.4525	17.0741	10.8405	0.275723
105	tr|Q9VMV5|Q9VMV5_DROME	Q9VMV5	vkg	FBgn0016075	CG16858	13	13	13	0	26.2612	29.3865	18.5492	0	0	24.2743	8.09145	10.4578	0.444502
106	tr|Q7JYZ0|Q7JYZ0_DROME	Q7JYZ0	l(2)k04810	FBgn0034162	CG6426	4	4	4	25.0644	25.4768	27.9312	26.1574	23.4762	0	23.7286	15.7349	10.4225	0.258457
107	tr|Q9VVC3|Q9VVC3_DROME	Q9VVC3	Cpr73D	FBgn0036680	CG9665	11	11	11	24.5107	24.8122	28.7285	26.0171	23.4328	0	23.5948	15.6759	10.3413	0.263456
108	tr|B7Z103|B7Z103_DROME	B7Z103	CG15055	FBgn0259223	CG42323	3	3	3	0	26.5319	29.144	18.5586	0	0	25.1218	8.37394	10.1847	0.461657
109	tr|M9PEV2|M9PEV2_DROME	M9PEV2	Dmel\CG5087	FBgn0035953	CG5087	2	2	2	30.4484	0	29.6892	20.0459	30.5912	0	0	10.1971	9.84879	0.528859
110	tr|M9PDW8|M9PDW8_DROME	M9PDW8	CG3950	FBgn0085446	CG34417	45	45	45	25.7241	26.9087	27.9765	26.8698	25.7784	0	25.4871	17.0885	9.7813	0.317386
111	tr|Q9VM07|Q9VM07_DROME	Q9VM07	Dmel\CG6055	FBgn0031918	CG6055	8	8	7	25.8375	25.5176	27.9348	26.43	25.0197	0	24.9949	16.6715	9.75846	0.308447
112	tr|E1JH64|E1JH64_DROME	E1JH64	shot	FBgn0013733	CG18076	59	59	4	25.2135	26.4771	28.039	26.5765	24.7881	0	25.7542	16.8474	9.72909	0.31461
113	tr|Q9W078|Q9W078_DROME	Q9W078	Cpr62Bb	FBgn0035280	CG13935	5	5	4	25.3142	24.9403	27.3986	25.8844	24.8021	0	24.1919	16.3313	9.55303	0.308926
114	tr|X2JFR1|X2JFR1_DROME	X2JFR1	nonA	FBgn0004227	CG4211	11	11	10	24.0884	24.7089	27.3594	25.3856	0	23.5091	24.2581	15.9224	9.46319	0.303769
115	tr|Q8IPD8|Q8IPD8_DROME	Q8IPD8	Cpr30F	FBgn0051876	CG31876	4	4	4	0	23.854	27.5177	17.1239	0	0	23.5714	7.85713	9.26675	0.471562
116	tr|Q9W204|Q9W204_DROME	Q9W204	jbug	FBgn0028371	CG30092	20	20	20	0	23.5636	26.857	16.8069	22.8505	0	0	7.61684	9.19002	0.464682
117	tr|A0A0B4LFD9|A0A0B4LFD9_DROME	A0A0B4LFD9	RpS23	FBgn0033912	CG8415	5	5	5	27.0852	27.223	26.8231	27.0437	27.1816	0	26.5002	17.8939	9.14981	0.364418
118	tr|Q7KVI9|Q7KVI9_DROME	Q7KVI9	BcDNA:RH38235	FBgn0034860	CG9812	6	6	6	27.0195	28.5133	28.0047	27.8458	28.2043	0	27.9386	18.7143	9.13154	0.384863
119	tr|Q9VK59|Q9VK59_DROME	Q9VK59	Dmel\CG5787	FBgn0032454	CG5787	12	12	12	0	25.128	25.5117	16.8799	23.2484	0	0	7.74947	9.13044	0.470175
120	tr|E1JHA4|E1JHA4_DROME	E1JHA4	Hrb27C	FBgn0004838	CG10377	5	5	5	0	24.755	26.1845	16.9798	0	0	23.8734	7.95781	9.02203	0.481687
121	tr|A4V2K7|A4V2K7_DROME	A4V2K7	D1	FBgn0000412	CG9745	6	6	6	26.2336	27.3266	26.1048	26.555	26.1472	26.4702	0	17.5391	9.01591	0.362452
122	tr|A4V4Q6|A4V4Q6_DROME	A4V4Q6	wupA	FBgn0283471	CG7178	5	5	3	0	24.8103	26.4524	17.0876	0	0	24.6186	8.20621	8.88135	0.495441
123	tr|A0A0B4KH25|A0A0B4KH25_DROME	A0A0B4KH25	His2Av	FBgn0001197	CG5499	5	3	3	25.0518	0	26.4338	17.1618	24.981	0	0	8.32701	8.83483	0.501213
124	tr|A0A0B4LGZ5|A0A0B4LGZ5_DROME	A0A0B4LGZ5	RpL11	FBgn0013325	CG7726	4	4	4	0	26.534	26.7824	17.7721	0	0	26.8223	8.94075	8.83138	0.522172
125	tr|A0A0B4LHL7|A0A0B4LHL7_DROME	A0A0B4LHL7	ATPsynD	FBgn0016120	CG6030	7	7	7	26.3036	26.2457	26.0791	26.2095	0	26.1598	26.3427	17.5008	8.70867	0.375975
126	tr|E1JHK0|E1JHK0_DROME	E1JHK0	CLIP-190	FBgn0020503	CG5020	7	7	3	25.8629	26.4507	26.4854	26.2663	0	26.3744	26.3878	17.5874	8.67893	0.379654
127	tr|Q9VUZ0|Q9VUZ0_DROME	Q9VUZ0	SsRbeta	FBgn0011016	CG5474	2	2	2	25.6252	25.9791	25.6497	25.7513	25.8156	25.4862	0	17.1006	8.65075	0.368951
128	tr|M9NFC0|M9NFC0_DROME	M9NFC0	wupA	FBgn0283471	CG7178	5	3	3	0	23.7194	25.4705	16.3966	0	0	23.4207	7.80691	8.58973	0.490654
129	tr|X2J8Y6|X2J8Y6_DROME	X2J8Y6	Acp36DE	FBgn0011559	CG7157	9	9	9	0	22.8051	25.7768	16.194	0	0	23.0385	7.6795	8.51448	0.489192
130	tr|Q0E8X7|Q0E8X7_DROME	Q0E8X7	roh	FBgn0250838	CG30415	3	3	3	25.4626	0	25.5526	17.0051	25.5441	0	0	8.5147	8.49038	0.519367
131	tr|O97064|O97064_DROME	O97064	Ccp84Ag	FBgn0004777	CG2342	5	5	5	24.6399	24.884	24.7619	24.762	24.9794	0	24.0213	16.3336	8.42839	0.36063
132	tr|M9PBH7|M9PBH7_DROME	M9PBH7	Rac1	FBgn0010333	CG2248	4	4	2	25.395	25.3045	24.9926	25.2307	25.2622	0	25.146	16.8027	8.42795	0.372593
133	sp|P54397|FKB39_DROME	P54397	Fkbp39	FBgn0013269	CG6226	5	5	5	26.3719	26.0712	25.4944	25.9792	26.6927	0	25.9649	17.5525	8.42665	0.391654
134	sp|Q9V3C0|DDX41_DROME	Q9V3C0	abs	FBgn0015331	CG14637	10	10	10	25.1797	24.752	25.0429	24.9915	24.8268	0	24.9056	16.5775	8.41408	0.367508
135	tr|Q9VT23|Q9VT23_DROME	Q9VT23	SP170	FBgn0036022	CG8329	4	4	4	24.8302	24.5818	24.4375	24.6165	24.8609	0	23.8039	16.2216	8.39486	0.359473
136	tr|M9NCP5|M9NCP5_DROME	M9NCP5	Dmel\CG5001	FBgn0031322	CG5001	4	4	4	25.4242	25.0513	25.6488	25.3748	25.1413	0	25.8266	16.9893	8.38548	0.379661
137	tr|A0A126GUS7|A0A126GUS7_DROME	A0A126GUS7	Fmr1	FBgn0028734	CG6203	10	10	10	24.2917	24.3882	24.8844	24.5214	24.4939	0	23.9256	16.1398	8.38159	0.357838
138	tr|Q9W0C3|Q9W0C3_DROME	Q9W0C3	Dmel\CG13928	FBgn0035246	CG13928	3	3	3	24.5318	24.8379	24.5571	24.6422	24.5021	0	24.358	16.2867	8.35556	0.362895
139	tr|Q9VUN9|Q9VUN9_DROME	Q9VUN9	Dmel\CG7857	FBgn0026738	CG7857	10	10	10	25.7402	25.5085	25.3016	25.5168	25.7776	0	25.7244	17.1673	8.34946	0.385823
140	tr|M9PCI2|M9PCI2_DROME	M9PCI2	NHP2	FBgn0029148	CG5258	3	3	3	25.8737	26.2385	25.1218	25.7447	0	26.0959	26.295	17.4636	8.28105	0.396952
141	sp|Q94901|LARK_DROME	Q94901	lark	FBgn0011640	CG8597	3	3	3	0	23.5788	24.3619	15.9802	0	0	23.1085	7.70282	8.27739	0.497306
142	tr|Q59E23|Q59E23_DROME	Q59E23	Hn	FBgn0001208	CG7399	11	11	11	24.5	25.0099	24.72	24.7433	24.8589	0	24.6257	16.4949	8.24845	0.373931
143	tr|Q9VGP7|Q9VGP7_DROME	Q9VGP7	mRpL40	FBgn0037892	CG5242	4	4	4	23.5816	23.8488	23.7049	23.7118	23.2022	0	23.2707	15.491	8.22082	0.348378
144	tr|Q7KUB0|Q7KUB0_DROME	Q7KUB0	Idh	FBgn0001248	CG7176	9	9	9	0	24.6082	24.8109	16.473	0	0	24.7827	8.26089	8.21213	0.520278
145	tr|Q8T6I0|Q8T6I0_DROME	Q8T6I0	Past1	FBgn0016693	CG6148	8	8	8	23.9003	23.8748	24.2008	23.992	0	23.8107	23.5651	15.7919	8.20003	0.35774
146	tr|E1JGY7|E1JGY7_DROME	E1JGY7	hlk	FBgn0010482	CG9432	16	2	2	24.9983	24.9056	24.452	24.7853	0	24.7911	24.969	16.5867	8.1986	0.378931
147	sp|O18334|RAB6_DROME	O18334	Rab6	FBgn0015797	CG6601	3	3	3	25.5979	25.258	25.3154	25.3904	25.5577	26.0293	0	17.1957	8.19478	0.394587
148	tr|Q9VZE4|Q9VZE4_DROME	Q9VZE4	cg1316	FBgn0035526	CG1316	4	4	4	24.4659	24.1969	23.9969	24.2199	23.8886	0	24.2261	16.0383	8.18164	0.365382
149	tr|Q9VKP2|Q9VKP2_DROME	Q9VKP2	Porin2	FBgn0069354	CG17137	8	8	8	0	24.9695	25.7371	16.9022	0	0	26.1665	8.72216	8.18005	0.537582
150	tr|Q7K5N8|Q7K5N8_DROME	Q7K5N8	BEST:GH19547	FBgn0034229	CG4847	5	5	5	24.3743	24.587	24.6643	24.5419	24.5317	0	24.5563	16.3627	8.17921	0.374036
151	tr|Q2PDR9|Q2PDR9_DROME	Q2PDR9	vari	FBgn0250785	CG9326	9	9	9	25.1931	25.0333	24.9423	25.0562	25.3683	0	25.284	16.8841	8.17213	0.387866
152	tr|Q9V455|Q9V455_DROME	Q9V455	Kap-alpha3	FBgn0027338	CG9423	8	8	8	24.874	24.7595	24.7769	24.8035	25.066	0	24.8573	16.6411	8.16237	0.382156
153	tr|M9MRT6|M9MRT6_DROME	M9MRT6	Rap1	FBgn0004636	CG1956	3	3	3	25.4409	25.0368	24.8761	25.1179	0	25.3479	25.5878	16.9786	8.13939	0.392061
154	tr|A4V1Y7|A4V1Y7_DROME	A4V1Y7	Trl	FBgn0013263	CG33261	3	3	3	0	24.3109	24.106	16.139	0	0	24.0023	8.00077	8.1382	0.513478
155	tr|Q9VEH0|Q9VEH0_DROME	Q9VEH0	alt	FBgn0038535	CG18212	8	8	8	24.8206	24.4394	24.0127	24.4242	24.5273	0	24.3671	16.2981	8.12608	0.375296
156	sp|Q9VHS2|COX7A_DROME	Q9VHS2	COX7A	FBgn0040529	CG9603	2	2	2	25.0918	24.6651	24.6694	24.8088	25.2042	0	24.8641	16.6894	8.11934	0.385745
157	sp|Q95029|CATL_DROME	Q95029	Cp1	FBgn0013770	CG6692	4	4	4	24.3859	24.3791	24.3827	24.3826	24.4984	0	24.327	16.2752	8.10739	0.375505
158	tr|Q9V428|Q9V428_DROME	Q9V428	ics	FBgn0028546	CG9031	6	6	6	24.1815	23.9099	24.3198	24.1371	24.0947	0	24.0394	16.0447	8.09233	0.370222
159	tr|Q9VT32|Q9VT32_DROME	Q9VT32	Prps	FBgn0036030	CG6767	5	5	5	24.905	24.7935	24.9419	24.8801	25.0202	0	25.3693	16.7965	8.08363	0.390324
160	tr|A4V303|A4V303_DROME	A4V303	CCT3	FBgn0015019	CG8977	7	7	7	24.7367	24.6662	24.4702	24.6244	24.6025	0	25.0262	16.5429	8.08148	0.383941
161	sp|P54359|SEPT2_DROME	P54359	Septin2	FBgn0014029	CG4173	6	6	6	24.3443	0	24.5506	16.2983	24.6765	0	0	8.22549	8.07279	0.524076
162	sp|Q9VCK0|EI3D1_DROME	Q9VCK0	eIF3d1	FBgn0040227	CG10161	8	8	8	24.2244	24.0866	24.2294	24.1801	24.1135	0	24.2696	16.1277	8.05244	0.374523
163	tr|X2JGG6|X2JGG6_DROME	X2JGG6	Hsp26	FBgn0001225	CG4183	4	4	4	24.7002	24.2567	24.5492	24.502	24.429	0	24.92	16.4497	8.05233	0.383118
164	tr|A0A0B4K6I1|A0A0B4K6I1_DROME	A0A0B4K6I1	scrib	FBgn0263289	CG43398	45	4	4	24.335	23.7069	23.5672	23.8697	23.634	23.8218	0	15.8186	8.0511	0.366474
165	tr|E1JJF3|E1JJF3_DROME	E1JJF3	Inx2	FBgn0027108	CG4590	4	4	4	0	24.0463	24.2292	16.0918	0	0	24.2766	8.0922	7.99962	0.521932
166	sp|Q27268|DX39B_DROME	Q27268	Hel25E	FBgn0014189	CG7269	4	4	4	24.6565	24.1184	24.1173	24.2974	24.5276	0	24.377	16.3015	7.99586	0.382248
167	tr|A4V2B8|A4V2B8_DROME	A4V2B8	CkIIalpha	FBgn0264492	CG17520	5	5	5	23.8454	23.976	24.2608	24.0274	24.0762	0	24.0328	16.0363	7.99107	0.375405
168	tr|Q9VA83|Q9VA83_DROME	Q9VA83	Fer2LCH	FBgn0015221	CG1469	6	6	6	24.7217	25.1946	25.354	25.0901	25.3961	0	25.9144	17.1035	7.98658	0.40339
169	tr|A0A0B4KFT0|A0A0B4KFT0_DROME	A0A0B4KFT0	COX5A	FBgn0019624	CG14724	3	3	3	25.5721	25.4959	25.1067	25.3916	25.8909	0	26.3244	17.4051	7.98647	0.410797
170	tr|Q7KUX3|Q7KUX3_DROME	Q7KUX3	Septin4	FBgn0259923	CG9699	5	5	5	24.2122	24.1491	23.6401	24.0005	24.0146	0	24.0531	16.0226	7.97789	0.375805
171	tr|Q9VAY6|Q9VAY6_DROME	Q9VAY6	BCAS2	FBgn0039558	CG4980	3	3	3	0	24.2027	23.6787	15.9605	0	0	23.9487	7.9829	7.97758	0.518751
172	tr|Q9VJ74|Q9VJ74_DROME	Q9VJ74	Dmel\CG10333	FBgn0032690	CG10333	13	13	13	25.2509	24.8186	24.4356	24.835	25.4413	0	25.1396	16.8603	7.9747	0.397917
173	sp|O61722|PRL1_DROME	O61722	PRL-1	FBgn0024734	CG4993	4	4	4	0	24.011	23.9106	15.9739	0	0	24.0052	8.00174	7.97213	0.519618
174	tr|M9PC23|M9PC23_DROME	M9PC23	Msp300	FBgn0261836	CG42768	13	13	4	24.5215	24.3197	0	16.2804	24.9303	0	0	8.31009	7.97029	0.53089
175	tr|Q9VMH9|Q9VMH9_DROME	Q9VMH9	Dmel\CG9150	FBgn0031775	CG9150	5	5	5	24.4383	24.4806	23.8955	24.2715	24.4177	0	24.5532	16.3236	7.94783	0.385424
176	sp|P08646|RAS1_DROME	P08646	Ras85D	FBgn0003205	CG9375	3	3	3	0	24.0714	23.9396	16.0036	0	0	24.2173	8.07242	7.93122	0.523749
177	tr|Q59DP4|Q59DP4_DROME	Q59DP4	anon-EST:fe2A9	FBgn0250819	CG33521	7	7	7	0	23.874	23.9704	15.9481	24.0595	0	0	8.01984	7.92827	0.521922
178	tr|Q9W1B9|Q9W1B9_DROME	Q9W1B9	RpL12	FBgn0034968	CG3195	3	3	3	24.2497	23.5534	23.4983	23.7671	23.7514	0	23.8361	15.8625	7.90462	0.375547
179	tr|O96607|O96607_DROME	O96607	homer	FBgn0025777	CG11324	7	7	7	24.2666	24.0552	23.8638	24.0619	24.5057	0	23.975	16.1602	7.90165	0.38361
180	sp|P12370|KAPC1_DROME	P12370	Pka-C1	FBgn0000273	CG4379	7	7	7	24.3959	23.9074	23.8582	24.0538	24.4455	0	24.0206	16.1554	7.89846	0.383679
181	sp|Q9VX32|RG190_DROME	Q9VX32	RhoGAPp190	FBgn0026375	CG32555	6	6	6	24.0439	0	23.1649	15.7362	0	0	23.539	7.84632	7.88992	0.51698
182	tr|Q8IH14|Q8IH14_DROME	Q8IH14	ssx	FBgn0024987	CG3056	5	5	4	23.6871	23.8153	0	15.8341	23.8408	0	0	7.94692	7.88721	0.520755
183	tr|Q1RKY1|Q1RKY1_DROME	Q1RKY1	Dmel\CG10737	FBgn0034420	CG10737	6	6	6	0	23.5367	23.6326	15.7231	23.5175	0	0	7.83916	7.88393	0.516833
184	sp|O02195|EIF3I_DROME	O02195	eIF3i	FBgn0015834	CG8882	3	3	3	24.0105	23.7632	23.5898	23.7878	23.7646	0	23.9644	15.9096	7.8782	0.378118
185	tr|A4V4I0|A4V4I0_DROME	A4V4I0	Gbeta13F	FBgn0001105	CG10545	5	5	5	0	23.9931	23.6072	15.8667	0	0	23.97	7.99	7.87675	0.522768
186	tr|M9PG55|M9PG55_DROME	M9PG55	Dmel\CG10600	FBgn0032717	CG10600	7	7	7	23.8285	23.7511	23.9488	23.8428	23.6946	0	24.204	15.9662	7.87664	0.379748
187	tr|M9ND19|M9ND19_DROME	M9ND19	Gale	FBgn0035147	CG12030	4	4	4	0	23.8572	23.4613	15.7728	0	0	23.6964	7.89879	7.87403	0.519469
188	sp|P80455|RS12_DROME	P80455	RpS12	FBgn0286213	CG11271	4	4	4	24.2148	23.9182	23.8645	23.9992	23.7115	0	24.6643	16.1253	7.87389	0.384358
189	tr|Q9VNC3|Q9VNC3_DROME	Q9VNC3	Hcs	FBgn0037332	CG14670	7	7	7	23.9981	24.8665	23.9583	24.2743	24.1341	0	25.0988	16.4109	7.86333	0.392703
190	sp|Q9VLN1|WDR82_DROME	Q9VLN1	Wdr82	FBgn0032030	CG17293	3	3	3	23.5801	23.3907	23.0641	23.345	23.332	0	23.1286	15.4869	7.85815	0.367681
191	tr|Q9W2J5|Q9W2J5_DROME	Q9W2J5	Dmel\CG44245	FBgn0265180	CG44245	8	8	8	25.3677	24.076	0	16.4812	0	0	25.8708	8.62361	7.85762	0.546226
192	tr|Q9VRL0|Q9VRL0_DROME	Q9VRL0	Cyt-c1	FBgn0035600	CG4769	5	5	5	24.0863	24.1168	24.3487	24.1839	24.5947	0	24.3912	16.3286	7.85529	0.390493
193	tr|Q9V3H9|Q9V3H9_DROME	Q9V3H9	Nab2	FBgn0028471	CG5720	4	4	4	23.0374	23.2085	0	15.4153	0	0	22.7538	7.58459	7.83071	0.509062
194	tr|Q9VY91|Q9VY91_DROME	Q9VY91	Pdcd4	FBgn0030520	CG10990	2	2	2	23.7196	23.722	23.5919	23.6779	23.9927	0	23.58	15.8576	7.82028	0.379872
195	tr|Q9VJ12|Q9VJ12_DROME	Q9VJ12	Acn	FBgn0263198	CG10473	10	10	10	24.7943	24.7787	24.5743	24.7158	25.3572	0	25.3388	16.8986	7.8171	0.407253
196	tr|M9PJP0|M9PJP0_DROME	M9PJP0	Nipsnap	FBgn0030724	CG9212	4	4	4	23.773	23.5086	23.513	23.5982	23.51	0	23.8418	15.7839	7.81427	0.378207
197	tr|B7YZI0|B7YZI0_DROME	B7YZI0	Vha44	FBgn0287825	CG8048	7	7	7	24.032	23.8603	23.928	23.9401	24.058	0	24.3448	16.1343	7.80582	0.388065
198	tr|Q24090|Q24090_DROME	Q24090	Snr1	FBgn0011715	CG1064	4	4	4	23.9434	23.6125	23.1506	23.5688	23.9707	0	23.3627	15.7778	7.79105	0.379547
199	sp|P32234|128UP_DROME	P32234	128up	FBgn0010339	CG8340	5	5	5	23.8029	23.6337	23.5529	23.6632	23.6906	0	23.9397	15.8768	7.78639	0.382236
200	tr|M9PEA6|M9PEA6_DROME	M9PEA6	RpS21	FBgn0015521	CG2986	3	3	3	0	23.5878	23.4551	15.681	0	0	23.7205	7.90682	7.77417	0.523534
201	tr|Q0E8E8|Q0E8E8_DROME	Q0E8E8	Mpcp2	FBgn0026409	CG4994	2	2	2	24.0388	0	23.3411	15.7933	0	24.064	0	8.02133	7.77198	0.527936
202	tr|E1JHT6|E1JHT6_DROME	E1JHT6	Rtnl1	FBgn0053113	CG33113	5	5	5	23.9433	23.9761	23.9159	23.9451	24.1795	0	24.3751	16.1849	7.76025	0.391899
203	tr|Q7JX87|Q7JX87_DROME	Q7JX87	Prx6c	FBgn0033518	CG11765	4	4	4	23.689	22.949	0	15.546	0	0	23.3576	7.78585	7.76014	0.519573
204	tr|M9MRX4|M9MRX4_DROME	M9MRX4	Ank2	FBgn0261788	CG42734	8	8	7	23.6701	23.6035	23.2075	23.4937	23.7094	0	23.5094	15.7396	7.75412	0.380342
205	tr|Q9V8V8|Q9V8V8_DROME	Q9V8V8	par-1	FBgn0260934	CG8201	8	8	8	23.728	23.8243	23.4025	23.6516	23.9362	23.7584	0	15.8982	7.75336	0.384668
206	tr|Q9VJL9|Q9VJL9_DROME	Q9VJL9	MET30	FBgn0028897	CG4935	7	7	7	23.8559	23.8028	23.388	23.6822	23.8618	0	23.9261	15.9293	7.75292	0.385541
207	tr|Q9VAX8|Q9VAX8_DROME	Q9VAX8	Dmel\CG4849	FBgn0039566	CG4849	11	11	11	24.5585	23.9058	23.8409	24.1017	24.5097	0	24.5392	16.3496	7.7521	0.396848
208	tr|Q7K012|Q7K012_DROME	Q7K012	Bap55	FBgn0025716	CG6546	5	5	5	23.959	23.8962	23.488	23.7811	24.3006	0	23.7956	16.0321	7.749	0.388586
209	sp|O76454|PHS_DROME	O76454	Pcd	FBgn0024841	CG1963	3	3	3	23.9669	23.7764	23.6176	23.787	23.9704	0	24.1887	16.053	7.73396	0.389882
210	tr|E6PBV6|E6PBV6_DROME	E6PBV6	CG1354-RA	FBgn0030151	CG1354	6	6	6	24.1233	23.8544	23.6158	23.8645	24.2786	0	24.119	16.1325	7.73198	0.392142
211	sp|Q05856|RSMB_DROME	Q05856	SmB	FBgn0262601	CG5352	3	3	3	24.3797	23.2737	23.6254	23.7596	24.0692	24.0309	0	16.0334	7.72626	0.390093
212	tr|Q9VHX9|Q9VHX9_DROME	Q9VHX9	CD98hc	FBgn0037533	CG2791	4	4	4	0	23.3931	23.2646	15.5526	0	0	23.4853	7.82843	7.72412	0.522495
213	tr|M9PG32|M9PG32_DROME	M9PG32	Taf6	FBgn0010417	CG32211	8	8	8	24.1538	24.1297	23.8692	24.0509	24.518	0	24.4625	16.3268	7.72409	0.397658
214	tr|Q9VQE0|Q9VQE0_DROME	Q9VQE0	Drp1	FBgn0026479	CG3210	6	6	6	23.4917	23.0152	23.5355	23.3475	23.6488	0	23.2547	15.6345	7.713	0.379807
215	tr|Q9VEA7|Q9VEA7_DROME	Q9VEA7	Dmel\CG18598	FBgn0038589	CG18598	3	3	3	23.9675	23.886	23.3182	23.7239	24.0736	0	23.9789	16.0175	7.70641	0.390558
216	tr|M9NEL1|M9NEL1_DROME	M9NEL1	CanA-14F	FBgn0267912	CG9819	6	6	5	24.3632	23.6398	23.8381	23.947	0	24.4227	24.3036	16.2421	7.70492	0.396622
217	tr|A0A0B4LEV8|A0A0B4LEV8_DROME	A0A0B4LEV8	coil	FBgn0033265	CG8710	3	3	3	0	23.4306	22.9529	15.4612	0	0	23.2693	7.75643	7.70473	0.520531
218	tr|A8DZ25|A8DZ25_DROME	A8DZ25	Dmel\CG42748	FBgn0261802	CG42748	3	3	3	23.1506	0	22.4386	15.1964	0	0	22.4854	7.49514	7.70125	0.510555
219	tr|Q9VJ86|Q9VJ86_DROME	Q9VJ86	bsf	FBgn0284256	CG10302	8	8	8	23.8258	23.9182	23.4255	23.7231	23.654	0	24.423	16.0257	7.69748	0.391373
220	tr|M9PB84|M9PB84_DROME	M9PB84	RpS2	FBgn0004867	CG5920	2	2	2	0	23.3149	23.5955	15.6368	0	23.8296	0	7.94319	7.69361	0.527987
221	tr|E2QD65|E2QD65_DROME	E2QD65	RpS19a	FBgn0010412	CG4464	4	4	4	23.9658	24.04	24.1147	24.0402	24.519	0	24.5652	16.3614	7.67877	0.401063
222	tr|Q9VPU7|Q9VPU7_DROME	Q9VPU7	aru	FBgn0029095	CG4276	5	5	5	23.3531	23.1087	23.34	23.2673	23.5244	0	23.2418	15.5888	7.6785	0.380377
223	tr|O76742|O76742_DROME	O76742	Rab7	FBgn0015795	CG5915	6	6	6	24.5238	24.4715	24.3773	24.4575	0	25.6958	24.679	16.7916	7.66593	0.413129
224	tr|Q9W335|Q9W335_DROME	Q9W335	l(1)G0320	FBgn0028327	CG32701	2	2	2	0	23.4574	23.1961	15.5512	0	0	23.6689	7.88964	7.66153	0.527219
225	tr|E1JGZ9|E1JGZ9_DROME	E1JGZ9	Prosalpha1R	FBgn0050382	CG30382	3	3	3	23.5598	22.9204	23.0543	23.1781	23.1418	0	23.4264	15.5227	7.65541	0.379962
226	tr|Q9VK69|Q9VK69_DROME	Q9VK69	CCT4	FBgn0032444	CG5525	3	3	3	0	23.0473	22.9419	15.3297	23.0623	0	0	7.68744	7.64228	0.520266
227	tr|Q9VRP3|Q9VRP3_DROME	Q9VRP3	Txl	FBgn0035631	CG5495	4	4	4	24.0744	23.4983	23.7946	23.7891	24.0821	0	24.3617	16.1479	7.64116	0.397648
228	sp|P13496|DCTN1_DROME	P13496	DCTN1-p150	FBgn0001108	CG9206	5	5	5	0	23.2286	22.7855	15.338	23.105	0	0	7.70168	7.63635	0.52107
229	tr|Q9VZC8|Q9VZC8_DROME	Q9VZC8	Dmel\CG15019	FBgn0035541	CG15019	4	4	4	23.5721	22.9598	22.9462	23.1594	23.457	0	23.1217	15.5263	7.63313	0.381335
230	tr|E2QD64|E2QD64_DROME	E2QD64	NO66	FBgn0266570	CG2982	3	3	3	23.5238	23.4844	22.9702	23.3262	23.4815	0	23.6555	15.7123	7.61385	0.387467
231	sp|O02649|CH60A_DROME	O02649	Hsp60A	FBgn0015245	CG12101	7	7	7	0	22.9201	23.2795	15.3999	0	0	23.3663	7.78875	7.61112	0.525371
232	tr|X2JLM6|X2JLM6_DROME	X2JLM6	Usp2	FBgn0031187	CG14619	2	2	2	0	22.9561	22.992	15.316	23.128	0	0	7.70934	7.6067	0.52249
233	tr|Q9W373|Q9W373_DROME	Q9W373	SmydA-9	FBgn0030102	CG12119	7	7	7	23.9162	23.7629	23.9022	23.8604	24.448	0	24.3624	16.2701	7.59033	0.403629
234	tr|Q8IP51|Q8IP51_DROME	Q8IP51	wb	FBgn0261563	CG42677	20	20	20	24.5229	23.7752	24.6201	24.3061	23.8119	0	26.3438	16.7186	7.5875	0.417227
235	tr|Q9VK11|Q9VK11_DROME	Q9VK11	cg16820	FBgn0032495	CG16820	3	3	3	0	23.5414	23.0837	15.5417	23.8962	0	0	7.96541	7.57629	0.533379
236	tr|A0A0B4LFB3|A0A0B4LFB3_DROME	A0A0B4LFB3	eIF3m	FBgn0033902	CG8309	5	5	5	0	22.985	23.3206	15.4352	0	0	23.6066	7.86886	7.56633	0.530147
237	tr|Q76NQ0|Q76NQ0_DROME	Q76NQ0	CG5364	FBgn0053303	CG33303	9	9	9	24.2389	24.0559	24.1904	24.1617	24.7717	0	25.0209	16.5975	7.56417	0.41363
238	tr|M9NDX3|M9NDX3_DROME	M9NDX3	Top1	FBgn0004924	CG6146	5	5	5	23.7193	23.2355	23.3857	23.4468	23.6559	0	24.0371	15.8977	7.54918	0.396143
239	tr|Q9VD14|Q9VD14_DROME	Q9VD14	Dmel\CG13850	FBgn0038961	CG13850	3	3	3	0	23.005	22.9971	15.334	0	0	23.3927	7.79757	7.53645	0.528608
240	tr|Q9VP57|Q9VP57_DROME	Q9VP57	pzg	FBgn0259785	CG7752	4	4	4	0	23.2641	23.1987	15.4876	23.8912	0	0	7.96372	7.52388	0.535343
241	tr|Q9VH72|Q9VH72_DROME	Q9VH72	BVR	FBgn0037749	CG9471	3	3	3	0	23.1231	22.7464	15.2898	0	0	23.3087	7.76956	7.52025	0.5282
242	tr|Q6NNV2|Q6NNV2_DROME	Q6NNV2	Syt7	FBgn0039900	CG2381	3	3	3	0	23.1889	22.5612	15.25	23.2329	0	0	7.7443	7.50573	0.527842
243	tr|Q9VT00|Q9VT00_DROME	Q9VT00	Jarid2	FBgn0036004	CG3654	2	2	2	23.2723	22.4189	0	15.2304	0	0	23.1917	7.73056	7.49984	0.527596
244	tr|A0A0B4KGP8|A0A0B4KGP8_DROME	A0A0B4KGP8	eIF2gamma	FBgn0263740	CG43665	7	7	7	23.8099	23.6725	23.8361	23.7728	24.5489	0	24.3094	16.2861	7.48671	0.409937
245	tr|A0A0B4KGE6|A0A0B4KGE6_DROME	A0A0B4KGE6	Rpn8	FBgn0002787	CG3416	5	5	5	23.7278	23.5619	23.4246	23.5714	24.1992	0	24.103	16.1007	7.47066	0.405967
246	tr|M9PDS8|M9PDS8_DROME	M9PDS8	sls	FBgn0086906	CG1915	21	21	21	24.7308	24.8204	24.3144	24.6219	25.8634	0	25.6352	17.1662	7.45568	0.434135
247	tr|Q9VYU7|Q9VYU7_DROME	Q9VYU7	dy	FBgn0004511	CG9355	2	2	2	0	22.9681	22.4739	15.1473	0	0	23.1343	7.71143	7.4359	0.529331
248	sp|P06604|TBA2_DROME	P06604	alphaTub85E	FBgn0003886	CG9476	12	3	3	23.2747	23.5532	23.5957	23.4745	24.205	0	23.9167	16.0406	7.43397	0.406501
249	tr|Q7KTW5|Q7KTW5_DROME	Q7KTW5	Dmel\CG9391	FBgn0037063	CG9391	2	2	2	0	22.7252	22.5958	15.107	23.0341	0	0	7.67804	7.42898	0.528289
250	tr|Q9VDH3|Q9VDH3_DROME	Q9VDH3	Ktl	FBgn0038839	CG10830	2	2	2	0	22.999	22.7587	15.2526	0	0	23.4944	7.83145	7.42112	0.534465
251	tr|A1Z9J6|A1Z9J6_DROME	A1Z9J6	mRpL53	FBgn0050481	CG30481	3	3	3	23.1225	23.0701	23.2319	23.1415	23.4357	0	23.7274	15.721	7.42043	0.398648
252	tr|Q7K3N4|Q7K3N4_DROME	Q7K3N4	Dmel\CG8888	FBgn0033679	CG8888	3	3	3	0	22.3297	22.57	14.9666	22.6612	0	0	7.55374	7.41284	0.524106
253	sp|Q9VZI3|UN112_DROME	Q9VZI3	Fit1	FBgn0035498	CG14991	4	4	4	0	22.6795	22.6329	15.1041	0	0	23.14	7.71332	7.39081	0.53117
254	tr|Q6NR03|Q6NR03_DROME	Q6NR03	sdt	FBgn0261873	CG32717	5	5	5	0	22.8447	22.3236	15.0561	0	0	23.0869	7.69564	7.36046	0.531747
255	sp|Q7K738|UBC10_DROME	Q7K738	Ubc10	FBgn0026316	CG5788	3	3	3	0	22.3667	22.5097	14.9588	0	0	23.0496	7.68321	7.27557	0.534666
256	tr|Q9VTF8|Q9VTF8_DROME	Q9VTF8	mRpL2	FBgn0036135	CG7636	2	2	2	0	22.148	22.3165	14.8215	0	0	22.7589	7.58631	7.23519	0.532558
257	tr|Q9VXI3|Q9VXI3_DROME	Q9VXI3	ERp44	FBgn0030734	CG9911	3	3	3	0	22.203	22.0191	14.7407	22.6212	0	0	7.54039	7.2003	0.532193
258	tr|A0A0B4K623|A0A0B4K623_DROME	A0A0B4K623	pug	FBgn0020385	CG4067	2	2	2	0	22.387	21.8697	14.7522	0	0	22.7743	7.59144	7.16078	0.535851
259	tr|Q9VJ28|Q9VJ28_DROME	Q9VJ28	L2HGDH	FBgn0032729	CG10639	3	3	3	0	22.2659	22.1728	14.8129	0	0	23.0306	7.67686	7.13606	0.540144
260	tr|Q9W229|Q9W229_DROME	Q9W229	RpS24	FBgn0261596	CG3751	2	2	2	0	23.1996	23.3793	15.5263	0	0	25.3854	8.46179	7.06449	0.571707
261	tr|Q9VZG2|Q9VZG2_DROME	Q9VZG2	Cpr64Aa	FBgn0035510	CG15006	8	8	8	29.0501	29.0504	31.9929	30.0311	25.8404	26.3355	27.2686	26.4815	3.54961	0.0291529
262	tr|M9NCS8|M9NCS8_DROME	M9NCS8	Glt	FBgn0001114	CG9280	24	24	24	26.1641	27.5932	29.3546	27.704	25.0539	24.8473	24.7698	24.8903	2.81365	0.0385271
263	tr|Q9VKE2|Q9VKE2_DROME	Q9VKE2	Crys	FBgn0005664	CG16963	23	23	23	29.5581	30.1679	34.1865	31.3042	28.8983	29.0073	27.9406	28.6154	2.68877	0.145646
264	tr|Q9VV46|Q9VV46_DROME	Q9VV46	Cpr72Ec	FBgn0036619	CG4784	22	22	22	28.4922	29.1101	33.2675	30.2899	28.0381	28.4845	26.7491	27.7572	2.53269	0.185777
265	tr|A8DRW0|A8DRW0_DROME	A8DRW0	Cpr49Aa	FBgn0050045	CG30045	5	5	5	27.8083	28.4493	30.0415	28.7664	26.2974	26.3572	26.3906	26.3484	2.41796	0.0219834
266	tr|Q9VZG0|Q9VZG0_DROME	Q9VZG0	Cpr64Ac	FBgn0035512	CG15008	12	12	12	29.2205	28.3868	31.5621	29.7231	26.5423	26.9622	28.8101	27.4382	2.28494	0.124515
267	tr|Q8SZM2|Q8SZM2_DROME	Q8SZM2	Vajk2	FBgn0032538	CG16885	12	12	12	27.5425	27.7837	30.7464	28.6909	26.4338	25.9062	27.0613	26.4671	2.22378	0.109241
268	tr|X2JAB9|X2JAB9_DROME	X2JAB9	Vinc	FBgn0004397	CG3299	29	29	29	25.2998	25.9957	28.4568	26.5841	25.0521	24.5662	23.9019	24.5067	2.07736	0.109864
269	tr|Q9V3Z9|Q9V3Z9_DROME	Q9V3Z9	Vajk3	FBgn0028544	CG16884	15	15	15	29.4666	28.7472	31.3516	29.8552	27.7787	27.2889	28.5401	27.8693	1.9859	0.0815221
270	sp|Q9VV36|RETIN_DROME	Q9VV36	retinin	FBgn0040074	CG13057	7	7	7	28.2799	28.6916	32.4247	29.7987	28.1312	28.8962	26.7849	27.9374	1.86129	0.270164
271	tr|M9ND95|M9ND95_DROME	M9ND95	Mhc	FBgn0264695	CG17927	117	117	2	30.9468	32.4183	33.5908	32.3186	30.4536	29.5678	31.517	30.5128	1.80584	0.130111
272	tr|Q9VB81|Q9VB81_DROME	Q9VB81	Cpr97Eb	FBgn0039481	CG15884	7	7	7	24.6184	24.5681	27.5702	25.5856	23.9317	23.8902	23.7576	23.8598	1.72574	0.157483
273	tr|A1ZBB4|A1ZBB4_DROME	A1ZBB4	hnRNP U	FBgn0050122	CG30122	18	18	18	25.6056	26.2507	27.5412	26.4658	24.6272	24.2598	25.3344	24.7405	1.72535	0.0568527
274	tr|P91941|P91941_DROME	P91941	Acp65Aa	FBgn0020765	CG10297	2	2	2	27.5501	28.777	29.4093	28.5788	27.0881	26.795	26.9498	26.9443	1.63448	0.0415799
275	tr|D3DMM4|D3DMM4_DROME	D3DMM4	mfas	FBgn0260745	CG3359	17	17	17	25.8425	26.5058	26.99	26.4461	25.0437	24.1012	25.5044	24.8831	1.56302	0.0420632
276	tr|Q9VIX3|Q9VIX3_DROME	Q9VIX3	Pax	FBgn0041789	CG31794	10	10	10	0	24.7089	26.2269	16.9786	23.5633	0	22.7172	15.4268	1.55179	0.899014
277	tr|Q8SZK9|Q8SZK9_DROME	Q8SZK9	slf	FBgn0287234	CG3244	11	11	11	25.5337	25.8125	28.146	26.4974	25.0837	24.9248	24.8782	24.9622	1.53517	0.138255
278	tr|Q0E980|Q0E980_DROME	Q0E980	Dmel\CG8547	FBgn0033919	CG8547	11	11	11	25.4873	26.0366	27.2832	26.269	25.3516	24.4841	24.3848	24.7401	1.52889	0.0673835
279	sp|C0HK95|FAU_DROME	C0HK95	fau	FBgn0266451	CG45077	8	7	7	28.0972	29.0136	29.0765	28.7291	27.4603	26.8336	27.4049	27.233	1.49615	0.0162031
280	tr|Q9VSA9|Q9VSA9_DROME	Q9VSA9	Dmel\CG7409	FBgn0035817	CG7409	11	11	11	27.8956	28.6504	29.7751	28.7737	27.8107	27.3345	26.9302	27.3585	1.41522	0.0785916
281	tr|Q7JWQ7|Q7JWQ7_DROME	Q7JWQ7	Swim	FBgn0034709	CG3074	11	11	11	27.2634	27.9215	28.985	28.0566	27.0343	26.5527	27.0089	26.8653	1.19132	0.0859697
282	tr|Q9V3W7|Q9V3W7_DROME	Q9V3W7	SF2	FBgn0283477	CG6987	11	11	11	25.3842	25.2032	25.401	25.3295	24.9664	24.8617	24.9982	24.9421	0.387367	0.00685888
283	tr|M9PD75|M9PD75_DROME	M9PD75	porin	FBgn0004363	CG6647	18	18	18	31.2539	31.1785	31.0336	31.1553	30.843	30.7384	30.5997	30.727	0.428332	0.0110037
284	tr|M9PGC4|M9PGC4_DROME	M9PGC4	sgg	FBgn0003371	CG2621	8	8	8	24.5256	24.6431	24.493	24.5539	24.3458	24.3055	24.3807	24.344	0.209905	0.0141812
285	sp|Q8T6B9|PUF68_DROME	Q8T6B9	hfp	FBgn0028577	CG12085	11	11	11	27.6283	27.6939	27.4882	27.6035	27.0432	27.1143	27.3667	27.1747	0.42874	0.0205489
286	tr|Q8IQW5|Q8IQW5_DROME	Q8IQW5	HspB8	FBgn0031037	CG14207	7	7	2	28.802	28.7802	28.732	28.7714	28.6343	28.6095	28.6994	28.6477	0.123707	0.0216759
287	tr|Q7KLW9|Q7KLW9_DROME	Q7KLW9	Prp19	FBgn0261119	CG5519	12	12	12	27.6855	27.4916	27.4285	27.5352	27.1211	27.1901	27.2909	27.2007	0.334532	0.0218086
288	tr|A0A0B4LGZ7|A0A0B4LGZ7_DROME	A0A0B4LGZ7	Dmel\CG45076	FBgn0266446	CG45076	17	17	16	27.9095	28.6418	28.6388	28.3967	27.7323	27.4748	27.6201	27.609	0.787674	0.0365024
289	sp|Q9VN91|MORN4_DROME	Q9VN91	rtp	FBgn0087005	CG10233	6	6	6	27.2353	27.5438	27.6052	27.4614	27.116	26.6195	26.9352	26.8902	0.571211	0.0365346
