# Supplementary material for: Tissue-specific O-GlcNAcylation profiling identifies substrates in translational machinery in Drosophila mushroom body contributing to olfactory learning
Source: eLife. 2024 Apr 15;13:e91269. doi: 10.7554/eLife.91269 (PMC11018347; doi:10.7554/eLife.91269)
Supplement: Supplementary file 8. [file elife-91269-supp8.xlsx]

## Sheet: Sheet1
O-GlcNAcylated proteins identified by TurboID-CpOGA CD from optic lobe of Drosophila.
NO.	Majority protein IDs	UniProtKB	Gene Symbol	FlyBase ID	Annotation Symbol	Peptides	Razor + unique peptides	Unique peptides	Log2( LFQ intensity+1)
									OL TurboID-CpOGA CD				OL TurboID-CpOGA DM				Log2 Fold Change	P Value
									1	2	3	Average	1	2	3	Average
1	tr|M9PJP0|M9PJP0_DROME	M9PJP0	Nipsnap	FBgn0030724	CG9212	4	4	4	24.6118	24.5458	24.3394	24.499	0	0	0	0	24.499	7.54921e-10
2	tr|Q53ZT0|Q53ZT0_DROME	Q53ZT0	DnaJ-1	FBgn0263106	CG10578	7	7	7	24.1183	24.3174	24.7437	24.3931	0	0	0	0	24.3931	1.96145e-08
3	tr|Q9VSY2|Q9VSY2_DROME	Q9VSY2	Cpsf5	FBgn0288470	CG3689	4	4	4	24.4235	24.0006	24.673	24.3657	0	0	0	0	24.3657	2.52385e-08
4	tr|Q8SXX1|Q8SXX1_DROME	Q8SXX1	PIP4K	FBgn0039924	CG17471	3	3	3	24.0483	23.8062	24.2857	24.0468	0	0	0	0	24.0468	6.5902e-09
5	tr|Q6NNV2|Q6NNV2_DROME	Q6NNV2	Syt7	FBgn0039900	CG2381	4	4	4	23.7366	23.9312	24.1076	23.9251	0	0	0	0	23.9251	2.41331e-09
6	tr|Q9VFV1|Q9VFV1_DROME	Q9VFV1	yellow-e	FBgn0041711	CG9792	5	5	5	24.2324	23.8954	23.5924	23.9067	0	0	0	0	23.9067	2.14251e-08
7	tr|Q9V3Y7|Q9V3Y7_DROME	Q9V3Y7	BG:DS01759.2	FBgn0028526	CG15293	4	4	4	23.459	23.5529	23.8064	23.6061	0	0	0	0	23.6061	2.23784e-09
8	tr|Q8MKJ6|Q8MKJ6_DROME	Q8MKJ6	cg11777	FBgn0033527	CG11777	2	2	2	23.6865	23.2726	23.6478	23.5356	0	0	0	0	23.5356	5.9345e-09
9	tr|X2JFD6|X2JFD6_DROME	X2JFD6	Mfe2	FBgn0030731	CG3415	4	4	4	23.4536	23.269	23.2388	23.3205	0	0	0	0	23.3205	4.12478e-10
10	tr|Q9W4Y3|Q9W4Y3_DROME	Q9W4Y3	trol	FBgn0284408	CG33950	27	27	27	27.0935	26.2614	26.5553	26.6367	0	0	26.8669	8.95564	17.6811	0.11968
11	sp|P48588|RS25_DROME	P48588	RpS25	FBgn0086472	CG6684	4	4	4	0	26.0987	26.6249	17.5745	0	0	0	0	17.5745	0.116156
12	tr|Q7K0W4|Q7K0W4_DROME	Q7K0W4	Vajk4	FBgn0050101	CG30101	8	8	8	26.9158	26.7752	25.5248	26.4053	0	0	26.698	8.89934	17.5059	0.120904
13	tr|Q0E8X7|Q0E8X7_DROME	Q0E8X7	roh	FBgn0250838	CG30415	3	3	3	26.0841	26.1767	25.907	26.0559	26.0958	0	0	8.69861	17.3573	0.116737
14	tr|A0A0B4KH34|A0A0B4KH34_DROME	A0A0B4KH34	AnxB9	FBgn0000083	CG5730	8	8	8	26.1899	26.1213	26.0342	26.1151	26.4543	0	0	8.81811	17.297	0.121344
15	tr|A1ZA23|A1ZA23_DROME	A1ZA23	Dmel\CG8192	FBgn0034030	CG8192	7	7	7	26.1885	25.8308	25.0953	25.7049	0	0	25.7946	8.5982	17.1067	0.117696
16	tr|A0A0B4K6U6|A0A0B4K6U6_DROME	A0A0B4K6U6	sqd	FBgn0263396	CG16901	5	5	5	25.3348	25.0299	25.4523	25.2723	0	0	24.5676	8.18918	17.0832	0.105328
17	tr|X2JKU5|X2JKU5_DROME	X2JKU5	RpS5a	FBgn0002590	CG8922	3	3	3	25.7222	25.6586	25.9067	25.7625	0	26.0616	0	8.68721	17.0753	0.120791
18	tr|Q9VMV5|Q9VMV5_DROME	Q9VMV5	vkg	FBgn0016075	CG16858	9	9	9	26.281	25.7617	25.4313	25.8247	0	0	26.6847	8.89491	16.9298	0.129852
19	sp|P15348|TOP2_DROME	P15348	Top2	FBgn0284220	CG10223	13	13	13	25.7201	24.5238	26.2713	25.5051	25.9132	0	0	8.63773	16.8673	0.123059
20	tr|Q9VEJ9|Q9VEJ9_DROME	Q9VEJ9	cysu	FBgn0038511	CG5873	9	9	9	24.8706	25.6321	24.1584	24.887	0	0	24.2399	8.07996	16.8071	0.106358
21	tr|Q9VEH0|Q9VEH0_DROME	Q9VEH0	alt	FBgn0038535	CG18212	10	10	10	24.8649	25.2437	25.2012	25.1033	25.2155	0	0	8.40515	16.6981	0.117928
22	tr|M9NDP1|M9NDP1_DROME	M9NDP1	ctp	FBgn0011760	CG6998	3	3	3	24.7611	25.201	25.1423	25.0348	0	0	25.0237	8.34124	16.6936	0.115977
23	tr|Q9VA36|Q9VA36_DROME	Q9VA36	cindr	FBgn0027598	CG31012	9	9	9	25.0348	25.0514	25.2983	25.1282	25.4154	0	0	8.47181	16.6564	0.120722
24	sp|P25455|PIP1_DROME	P25455	Plc21C	FBgn0004611	CG4574	8	8	8	24.876	24.3456	25.0782	24.7666	24.6459	0	0	8.21531	16.5513	0.114279
25	sp|P21914|SDHB_DROME	P21914	SdhB	FBgn0014028	CG3283	4	4	4	24.8436	25.2337	24.9142	24.9972	0	25.5233	0	8.50777	16.4894	0.124668
26	tr|A0A0S0WGW8|A0A0S0WGW8_DROME	A0A0S0WGW8	l(3)mbn	FBgn0002440	CG12755	6	6	6	24.9102	24.9235	24.6137	24.8158	0	0	25.075	8.35832	16.4575	0.120328
27	tr|Q9VV18|Q9VV18_DROME	Q9VV18	Dmel\CG13047	FBgn0036594	CG13047	2	2	2	25.0777	25.3035	24.6018	24.9944	25.6238	0	0	8.54126	16.4531	0.126433
28	tr|Q9VPZ5|Q9VPZ5_DROME	Q9VPZ5	CT16527	FBgn0031327	CG5397	6	6	6	24.7737	24.333	24.6503	24.5857	24.4191	0	0	8.13971	16.446	0.113472
29	tr|Q9VVZ4|Q9VVZ4_DROME	Q9VVZ4	Dmel\CG14095	FBgn0036870	CG14095	2	2	2	24.9861	24.2957	24.6781	24.6533	0	0	24.6768	8.22558	16.4277	0.116574
30	tr|Q59E23|Q59E23_DROME	Q59E23	Hn	FBgn0001208	CG7399	7	7	7	24.6037	24.4871	25.109	24.7333	24.9962	0	0	8.33206	16.4012	0.120455
31	tr|E6PBV6|E6PBV6_DROME	E6PBV6	CG1354-RA	FBgn0030151	CG1354	7	7	7	24.7783	24.6901	24.8659	24.7781	25.3679	0	0	8.45595	16.3222	0.125783
32	tr|Q1RKY1|Q1RKY1_DROME	Q1RKY1	Dmel\CG10737	FBgn0034420	CG10737	8	8	8	24.2445	24.6569	24.4039	24.4351	24.4209	0	0	8.14028	16.2948	0.115914
33	tr|Q24090|Q24090_DROME	Q24090	Snr1	FBgn0011715	CG1064	4	4	4	24.2478	24.4044	24.6867	24.4463	24.5381	0	0	8.17936	16.2669	0.117648
34	sp|P17210|KINH_DROME	P17210	Khc	FBgn0001308	CG7765	8	8	8	24.1161	24.3595	24.4622	24.3126	24.2324	0	0	8.07747	16.2351	0.11483
35	tr|M9NDM3|M9NDM3_DROME	M9NDM3	rhea	FBgn0260442	CG6831	10	10	10	24.6922	23.8734	23.813	24.1262	0	0	23.7484	7.91612	16.2101	0.110137
36	sp|O02195|EIF3I_DROME	O02195	eIF3i	FBgn0015834	CG8882	3	3	3	24.0906	24.6337	24.5823	24.4355	24.7579	0	0	8.25262	16.1829	0.121483
37	tr|Q9W0S4|Q9W0S4_DROME	Q9W0S4	miple2	FBgn0029002	CG18321	3	3	3	24.3753	24.0509	24.0865	24.1709	0	24.0036	0	8.0012	16.1697	0.113401
38	tr|Q9VFT4|Q9VFT4_DROME	Q9VFT4	rin	FBgn0015778	CG9412	5	5	5	24.1234	24.328	24.4033	24.2849	24.3773	0	0	8.12576	16.1591	0.117649
39	tr|Q9VHN4|Q9VHN4_DROME	Q9VHN4	Dmel\CG8043	FBgn0037610	CG8043	3	3	3	23.9228	24.1275	24.1796	24.0767	23.7734	0	0	7.92448	16.1522	0.111175
40	tr|Q9VQM2|Q9VQM2_DROME	Q9VQM2	ND-B14.5B	FBgn0031505	CG12400	4	4	4	24.5368	24.5324	24.5904	24.5532	0	25.2172	0	8.40572	16.1475	0.127124
41	tr|Q95RB1|Q95RB1_DROME	Q95RB1	Dmel\CG14641	FBgn0037220	CG14641	5	5	5	24.1782	24.6762	24.5496	24.468	24.9643	0	0	8.32143	16.1466	0.124371
42	sp|P12080|ITA2_DROME	P12080	if	FBgn0001250	CG9623	5	5	5	24.5886	24.0994	24.332	24.34	0	0	24.5835	8.19449	16.1455	0.12017
43	tr|Q9VHX9|Q9VHX9_DROME	Q9VHX9	CD98hc	FBgn0037533	CG2791	6	6	6	24.1951	24.2028	24.1007	24.1662	24.1064	0	0	8.03546	16.1307	0.115136
44	tr|Q9W335|Q9W335_DROME	Q9W335	l(1)G0320	FBgn0028327	CG32701	2	2	2	24.4158	24.0429	24.3268	24.2618	24.4562	0	0	8.15207	16.1098	0.119351
45	tr|M9MS72|M9MS72_DROME	M9MS72	Pka-R1	FBgn0259243	CG42341	5	5	5	23.8615	23.9377	24.8542	24.2178	24.3369	0	0	8.11232	16.1055	0.118289
46	tr|A4V2B8|A4V2B8_DROME	A4V2B8	CkIIalpha	FBgn0264492	CG17520	5	5	5	24.1681	24.3335	24.2894	24.2637	24.5651	0	0	8.18837	16.0753	0.121116
47	sp|Q9VVH3|MIC13_DROME	Q9VVH3	QIL1	FBgn0036726	CG7603	3	3	3	0	24.2162	24.006	16.074	0	0	0	0	16.074	0.116124
48	tr|Q7K3V6|Q7K3V6_DROME	Q7K3V6	mEFTu2	FBgn0033184	CG12736	6	6	6	24.1881	23.765	24.0788	24.0106	23.9809	0	0	7.99365	16.017	0.115658
49	tr|Q9XYZ9|Q9XYZ9_DROME	Q9XYZ9	GstE12	FBgn0027590	CG16936	3	3	3	23.7512	24.1688	23.8976	23.9392	23.8403	0	0	7.94676	15.9924	0.11451
50	tr|O76521|O76521_DROME	O76521	Kap-alpha1	FBgn0024889	CG8548	3	3	3	23.8026	23.8468	24.0996	23.9164	23.7899	0	0	7.92998	15.9864	0.114042
51	tr|Q9W158|Q9W158_DROME	Q9W158	Dmel\CG4612	FBgn0035016	CG4612	3	3	3	23.9748	24.4259	24.0744	24.1584	24.5678	0	0	8.18928	15.9691	0.122996
52	tr|Q9VAX8|Q9VAX8_DROME	Q9VAX8	Dmel\CG4849	FBgn0039566	CG4849	9	9	9	23.9291	24.4026	24.4105	24.2474	24.9191	0	0	8.30636	15.9411	0.127449
53	tr|M9ND19|M9ND19_DROME	M9ND19	Gale	FBgn0035147	CG12030	5	5	5	23.7878	23.8058	24.0631	23.8855	23.8832	0	0	7.96108	15.9245	0.116095
54	tr|Q8T0J5|Q8T0J5_DROME	Q8T0J5	Dmel\CG7675	FBgn0038610	CG7675	4	4	4	23.773	23.9343	23.9031	23.8701	23.8681	0	0	7.95602	15.9141	0.116087
55	tr|E2QC83|E2QC83_DROME	E2QC83	Pabp2	FBgn0005648	CG2163	2	2	2	23.6728	23.8576	24.2648	23.9317	24.0742	0	0	8.02474	15.907	0.118561
56	tr|Q9VCN3|Q9VCN3_DROME	Q9VCN3	bb8	FBgn0039071	CG4434	8	8	8	24.686	24.4416	24.6701	24.5992	0	26.0851	0	8.69504	15.9042	0.141386
57	tr|Q9VT23|Q9VT23_DROME	Q9VT23	SP170	FBgn0036022	CG8329	3	3	3	0	23.957	23.7504	15.9025	0	0	0	0	15.9025	0.116124
58	tr|A0A0B4KHU1|A0A0B4KHU1_DROME	A0A0B4KHU1	Rlip	FBgn0026056	CG11622	3	3	3	23.8796	23.4173	24.2976	23.8648	23.9992	0	0	7.99974	15.8651	0.118503
59	tr|Q9VGP7|Q9VGP7_DROME	Q9VGP7	mRpL40	FBgn0037892	CG5242	3	3	3	23.7894	23.7247	23.7152	23.7431	23.7006	0	0	7.9002	15.8429	0.115407
60	tr|Q7KMQ0|Q7KMQ0_DROME	Q7KMQ0	Rpt1	FBgn0028687	CG1341	4	4	4	23.7281	23.4628	23.7673	23.6527	23.4851	0	0	7.82835	15.8244	0.113334
61	tr|A0A6H2EG56|A0A6H2EG56_DROME	A0A6H2EG56	Tm1	FBgn0003721	CG4898	4	4	4	24.013	23.3864	22.9282	23.4425	22.8716	0	0	7.62387	15.8187	0.106851
62	sp|Q9VN50|EI3F1_DROME	Q9VN50	eIF3f1	FBgn0037270	CG9769	4	4	4	23.8044	23.9198	23.7208	23.815	0	24.0341	0	8.01138	15.8036	0.119813
63	tr|Q8INK3|Q8INK3_DROME	Q8INK3	fabp	FBgn0037913	CG6783	3	3	3	0	23.0996	24.2167	15.7721	0	0	0	0	15.7721	0.116338
64	sp|Q8SXY6|TMEDA_DROME	Q8SXY6	bai	FBgn0045866	CG11785	2	2	2	0	23.4912	23.642	15.711	0	0	0	0	15.711	0.116121
65	tr|Q9VWD0|Q9VWD0_DROME	Q9VWD0	parvin	FBgn0052528	CG32528	2	2	2	0	23.3354	23.7194	15.6849	0	0	0	0	15.6849	0.116143
66	sp|Q9VSS2|SRP68_DROME	Q9VSS2	Srp68	FBgn0035947	CG5064	3	3	3	23.619	23.1467	23.511	23.4255	23.3217	0	0	7.7739	15.6516	0.114404
67	tr|M9PDK5|M9PDK5_DROME	M9PDK5	VhaSFD	FBgn0027779	CG17332	4	4	4	23.5956	23.3902	23.4828	23.4895	23.5502	0	0	7.85005	15.6395	0.117153
68	tr|B4F5U4|B4F5U4_DROME	B4F5U4	Spase25	FBgn0030306	CG1751	4	4	4	23.9119	23.9376	23.5165	23.7887	0	24.4484	0	8.14947	15.6392	0.127451
69	tr|Q9VH72|Q9VH72_DROME	Q9VH72	BVR	FBgn0037749	CG9471	3	3	3	23.3022	23.5087	23.7391	23.5167	23.6449	0	0	7.88164	15.635	0.118331
70	tr|Q9VHL2|Q9VHL2_DROME	Q9VHL2	CCT7	FBgn0037632	CG8351	3	3	3	23.7835	23.513	23.5826	23.6264	0	23.996	0	7.99867	15.6277	0.122438
71	tr|Q9VJZ4|Q9VJZ4_DROME	Q9VJZ4	ND-B22	FBgn0032511	CG9306	4	4	4	23.4524	23.8843	23.5886	23.6418	0	24.0955	0	8.03182	15.6099	0.123912
72	sp|Q9VTP4|R10AB_DROME	Q9VTP4	RpL10Ab	FBgn0036213	CG7283	2	2	2	23.4747	23.005	22.9502	23.1433	22.6739	0	0	7.55797	15.5853	0.108255
73	sp|Q9VG73|ILF2_DROME	Q9VG73	CG5641	FBgn0038046	CG5641	3	3	3	0	23.2284	23.4789	15.5691	0	0	0	0	15.5691	0.116128
74	sp|P32234|128UP_DROME	P32234	128up	FBgn0010339	CG8340	5	5	5	23.5078	23.4035	23.7469	23.5528	24.0005	0	0	8.00017	15.5526	0.123824
75	tr|X2JA43|X2JA43_DROME	X2JA43	Ns3	FBgn0266284	CG14788	5	5	5	0	23.3005	23.2826	15.5277	0	0	0	0	15.5277	0.116117
76	tr|E1JJI5|E1JJI5_DROME	E1JJI5	CkIalpha	FBgn0015024	CG2028	2	2	2	23.3952	22.8773	23.4102	23.2275	23.2565	0	0	7.75217	15.4754	0.116681
77	sp|Q9VTZ6|PMM_DROME	Q9VTZ6	Pmm2	FBgn0036300	CG10688	5	5	5	0	23.3576	23.0492	15.4689	0	0	0	0	15.4689	0.116134
78	tr|Q8IR21|Q8IR21_DROME	Q8IR21	CG9216	FBgn0259700	CG42354	2	2	2	23.3313	23.053	22.999	23.1278	23.1574	0	0	7.71912	15.4086	0.11665
79	tr|Q9VY78|Q9VY78_DROME	Q9VY78	Clic	FBgn0030529	CG10997	2	2	2	0	23.068	23.0865	15.3848	0	0	0	0	15.3848	0.116117
80	tr|Q9VQS0|Q9VQS0_DROME	Q9VQS0	bs30c03.y1	FBgn0031545	CG3213	3	3	3	0	22.9116	23.0133	15.3083	0	0	0	0	15.3083	0.116118
81	tr|E2QD63|E2QD63_DROME	E2QD63	HIP-R	FBgn0029676	CG2947	3	3	3	23.0547	23.2552	23.2561	23.1887	0	23.6425	0	7.88084	15.3078	0.124043
82	tr|A4V441|A4V441_DROME	A4V441	sn	FBgn0003447	CG32858	5	5	5	23.2856	23.0365	23.2978	23.2066	23.8579	0	0	7.95265	15.254	0.127566
83	tr|B7Z103|B7Z103_DROME	B7Z103	CG15055	FBgn0259223	CG42323	3	3	3	29.4597	28.9647	28.0237	28.816	0	27.6956	28.2851	18.6602	10.1558	0.338071
84	tr|A1Z9J3|A1Z9J3_DROME	A1Z9J3	shot	FBgn0013733	CG18076	19	19	2	26.0112	25.8764	25.5842	25.8239	22.7843	0	25.0304	15.9382	9.88573	0.283991
85	tr|Q9VVC3|Q9VVC3_DROME	Q9VVC3	Cpr73D	FBgn0036680	CG9665	8	8	8	27.1698	26.9435	26.2045	26.7726	0	24.6609	26.732	17.131	9.64165	0.324561
86	tr|R9PY51|R9PY51_DROME	R9PY51	CG4588	FBgn0259713	CG42367	2	2	2	27.5716	27.2408	26.2759	27.0294	0	25.3749	26.9331	17.436	9.59342	0.333912
87	tr|M9NCS8|M9NCS8_DROME	M9NCS8	Glt	FBgn0001114	CG9280	14	14	14	27.7167	27.1645	27.0413	27.3075	0	26.2424	27.4737	17.9053	9.40216	0.353335
88	tr|A8DYJ3|A8DYJ3_DROME	A8DYJ3	CalpA	FBgn0012051	CG7563	3	3	3	28.4463	28.4495	28.819	28.5716	28.7909	0	28.7362	19.1757	9.39595	0.382616
89	tr|X2JD89|X2JD89_DROME	X2JD89	bt	FBgn0005666	CG32019	32	32	32	26.0676	25.8213	26.1918	26.0269	26.0337	0	23.8796	16.6378	9.38913	0.32337
90	tr|A1Z8H1|A1Z8H1_DROME	A1Z8H1	Cpr47Ea	FBgn0033597	CG9079	4	4	4	27.991	27.7757	26.8674	27.5447	0	26.6246	28.3657	18.3301	9.21455	0.372535
91	tr|Q9VSN3|Q9VSN3_DROME	Q9VSN3	Cpr66D	FBgn0052029	CG32029	6	6	6	26.4015	26.6438	25.4621	26.1691	0	25.009	25.9838	16.9976	9.17152	0.341865
92	tr|Q9W077|Q9W077_DROME	Q9W077	Cpr62Bc	FBgn0035281	CG1919	2	2	2	27.5574	27.9521	0	18.5032	0	0	28.2975	9.43248	9.07069	0.530118
93	tr|Q8IPD8|Q8IPD8_DROME	Q8IPD8	Cpr30F	FBgn0051876	CG31876	5	5	5	27.2879	26.5973	25.5437	26.4763	0	25.8629	26.4179	17.4269	9.04937	0.358465
94	tr|Q9VIQ8|Q9VIQ8_DROME	Q9VIQ8	COX4	FBgn0032833	CG10664	5	5	5	27.1708	27.0793	27.1218	27.124	27.0859	27.2171	0	18.101	9.02299	0.375213
95	tr|A1Z7G2|A1Z7G2_DROME	A1Z7G2	Dmel\CG14752	FBgn0033307	CG14752	2	2	2	26.9605	28.2663	0	18.4089	0	0	28.1596	9.38652	9.02241	0.530398
96	tr|X2JAB9|X2JAB9_DROME	X2JAB9	Vinc	FBgn0004397	CG3299	18	18	18	26.1798	25.9118	26.0057	26.0324	24.9798	0	26.146	17.0419	8.99049	0.351243
97	tr|Q9VZF9|Q9VZF9_DROME	Q9VZF9	Cpr64Ad	FBgn0035513	CG1259	8	8	8	26.5978	26.7949	26.4765	26.6231	26.5192	0	26.469	17.6627	8.96034	0.3677
98	tr|A4V2K7|A4V2K7_DROME	A4V2K7	D1	FBgn0000412	CG9745	3	3	3	26.1017	26.2635	25.9496	26.1049	25.9843	0	25.5594	17.1812	8.92367	0.357645
99	tr|M9PBM1|M9PBM1_DROME	M9PBM1	U2af38	FBgn0017457	CG3582	4	4	4	25.775	26.3169	26.0857	26.0592	25.9772	0	25.5505	17.1759	8.88333	0.359502
100	tr|Q9W2Z7|Q9W2Z7_DROME	Q9W2Z7	CG18512	FBgn0052694	CG32694	5	5	4	27.139	26.6753	25.783	26.5324	25.9793	0	27.0563	17.6786	8.85387	0.373892
101	tr|Q9VKP2|Q9VKP2_DROME	Q9VKP2	Porin2	FBgn0069354	CG17137	10	10	10	27.2643	27.0822	26.5995	26.982	0	28.1115	26.3764	18.1626	8.81938	0.387217
102	sp|Q9VSL3|SEPIA_DROME	Q9VSL3	se	FBgn0086348	CG6781	5	5	5	25.3939	25.0087	25.0699	25.1575	24.4246	24.6405	0	16.355	8.80242	0.342391
103	sp|Q9XY35|QCR9_DROME	Q9XY35	ox	FBgn0011227	CG8764	2	2	2	26.3063	26.7515	27.2108	26.7562	26.7397	27.1837	0	17.9745	8.78175	0.384054
104	tr|A0A0C4DHE8|A0A0C4DHE8_DROME	A0A0C4DHE8	RpS29	FBgn0261599	CG8495	3	3	3	26.6898	26.8317	26.8611	26.7942	26.9555	0	27.1029	18.0195	8.77475	0.385257
105	tr|M9PDS8|M9PDS8_DROME	M9PDS8	sls	FBgn0086906	CG1915	7	7	7	25.8485	0	25.9533	17.2673	25.6706	0	0	8.55686	8.71042	0.51325
106	sp|O18334|RAB6_DROME	O18334	Rab6	FBgn0015797	CG6601	4	4	4	25.7902	25.8536	26.0185	25.8874	25.9852	0	25.6236	17.2029	8.6845	0.369821
107	sp|Q94901|LARK_DROME	Q94901	lark	FBgn0011640	CG8597	5	5	5	24.8836	25.0637	24.9351	24.9608	0	24.3666	24.4828	16.2831	8.67764	0.346568
108	sp|Q9W4P5|VA0D1_DROME	Q9W4P5	VhaAC39-1	FBgn0285910	CG2934	2	2	2	24.4096	24.4674	25.1092	24.662	0	24.0295	24.1478	16.0591	8.60295	0.344497
109	tr|X2JE34|X2JE34_DROME	X2JE34	eIF4H1	FBgn0262734	CG4429	5	5	5	24.4264	24.1178	24.4713	24.3385	23.4161	0	23.8737	15.7633	8.57524	0.337863
110	tr|Q9V3U6|Q9V3U6_DROME	Q9V3U6	26-29-p	FBgn0250848	CG8947	6	6	6	25.4667	25.0793	25.1325	25.2262	25.1175	0	24.8578	16.6584	8.56774	0.361844
111	tr|E5DK16|E5DK16_DROME	E5DK16	Lpin	FBgn0263593	CG8709	7	7	7	24.7432	24.5985	24.5805	24.6407	24.3264	0	23.9273	16.0846	8.55614	0.347391
112	sp|P61857|TBB2_DROME	P61857	betaTub85D	FBgn0003889	CG9359	14	4	4	26.3907	25.9691	26.2017	26.1872	0	27.2391	25.6999	17.6463	8.54084	0.388443
113	tr|Q9VC36|Q9VC36_DROME	Q9VC36	polybromo	FBgn0039227	CG11375	18	18	18	25.7044	25.9729	25.974	25.8838	26.2052	0	25.8278	17.3443	8.53944	0.380579
114	sp|Q9V3C0|DDX41_DROME	Q9V3C0	abs	FBgn0015331	CG14637	9	9	9	24.9278	25.1506	24.9561	25.0115	24.9042	24.5682	0	16.4908	8.52072	0.359849
115	sp|O18404|HCD2_DROME	O18404	scu	FBgn0021765	CG7113	5	5	5	25.59	25.3092	25.7437	25.5476	25.8776	0	25.2193	17.0323	8.51532	0.374098
116	tr|E2QD73|E2QD73_DROME	E2QD73	dnc	FBgn0000479	CG32498	13	13	13	25.3021	25.8784	26.0578	25.7461	26.0061	0	25.7108	17.239	8.50713	0.379704
117	tr|Q8T0I9|Q8T0I9_DROME	Q8T0I9	Tsp	FBgn0031850	CG11326	3	3	3	25.2514	24.2447	23.9332	24.4764	23.673	0	24.2465	15.9732	8.50326	0.347639
118	tr|Q7K3W4|Q7K3W4_DROME	Q7K3W4	qsm	FBgn0028622	CG13432	5	5	5	24.9473	24.8315	0	16.5929	24.3517	0	0	8.11724	8.47567	0.505721
119	sp|P48596|GCH1_DROME	P48596	Pu	FBgn0003162	CG9441	4	4	4	25.4328	25.0435	0	16.8254	25.1127	0	0	8.37089	8.45455	0.51559
120	sp|Q7KN62|TERA_DROME	Q7KN62	TER94	FBgn0286784	CG2331	8	8	8	24.5879	24.6912	25.0414	24.7735	24.4561	24.5017	0	16.3193	8.45423	0.35874
121	tr|A0A0B4LHS1|A0A0B4LHS1_DROME	A0A0B4LHS1	Mlc1	FBgn0002772	CG5596	3	3	3	25.858	25.5248	25.3938	25.5922	0	25.8666	25.6848	17.1838	8.40842	0.383231
122	sp|Q9VHS2|COX7A_DROME	Q9VHS2	COX7A	FBgn0040529	CG9603	2	2	2	24.7255	25.0171	25.2879	25.0102	24.9388	0	24.8883	16.609	8.40113	0.369018
123	tr|A0A0B4JDA0|A0A0B4JDA0_DROME	A0A0B4JDA0	mor	FBgn0002783	CG18740	6	6	6	24.8548	24.959	25.2521	25.022	25.2208	0	24.6974	16.6394	8.38258	0.370783
124	tr|Q9VSX2|Q9VSX2_DROME	Q9VSX2	BEST:GH12586	FBgn0035982	CG4461	3	3	3	24.7747	25.1086	24.7103	24.8645	24.657	0	24.7934	16.4835	8.38108	0.366756
125	tr|A0A6F7U5U6|A0A6F7U5U6_DROME	A0A6F7U5U6	pyd	FBgn0262614	CG43140	11	11	11	25.2557	25.0764	25.1535	25.1619	25.5482	0	24.7969	16.7817	8.38016	0.3746
126	tr|A0A0B4K7H5|A0A0B4K7H5_DROME	A0A0B4K7H5	Mmp1	FBgn0035049	CG4859	9	9	9	25.0769	24.8022	24.8035	24.8942	24.9822	24.6882	0	16.5568	8.3374	0.370901
127	sp|O61722|PRL1_DROME	O61722	PRL-1	FBgn0024734	CG4993	6	6	6	24.8449	25.2112	25.2668	25.1076	25.3184	25.0058	0	16.7748	8.33289	0.376777
128	tr|O61380|O61380_DROME	O61380	eIF4G1	FBgn0023213	CG10811	13	13	13	24.9127	24.9832	25.1882	25.028	25.2131	0	24.8757	16.6963	8.33178	0.374793
129	tr|Q9VTR6|Q9VTR6_DROME	Q9VTR6	prc	FBgn0028573	CG5700	5	5	5	24.8933	25.4829	24.4028	24.9263	24.1169	0	25.6709	16.5959	8.33038	0.373157
130	tr|E2QD64|E2QD64_DROME	E2QD64	NO66	FBgn0266570	CG2982	2	2	2	24.3171	0	24.2633	16.1934	0	0	23.6009	7.86698	8.32647	0.501709
131	tr|C8VV14|C8VV14_DROME	C8VV14	Ald1	FBgn0000064	CG6058	10	10	10	24.9335	24.7198	25.3011	24.9848	24.9237	25.0534	0	16.6591	8.32573	0.37419
132	tr|X2JB25|X2JB25_DROME	X2JB25	Yp2	FBgn0005391	CG2979	8	8	7	25.6251	25.7679	25.3997	25.5976	26.0838	0	25.7353	17.273	8.32454	0.389753
133	tr|M9NEL1|M9NEL1_DROME	M9NEL1	CanA-14F	FBgn0267912	CG9819	5	5	3	24.8196	25.1033	24.8293	24.9174	0	24.9614	24.8548	16.6054	8.31203	0.373449
134	tr|Q9V3H9|Q9V3H9_DROME	Q9V3H9	Nab2	FBgn0028471	CG5720	5	5	5	25.1332	24.86	25.0124	25.0019	25.2855	0	24.8037	16.6964	8.30548	0.376182
135	tr|M9PFF0|M9PFF0_DROME	M9PFF0	RpL13	FBgn0011272	CG4651	5	5	5	24.8545	0	24.5046	16.453	24.4553	0	0	8.15175	8.30127	0.513149
136	tr|X2JCP8|X2JCP8_DROME	X2JCP8	Act5C	FBgn0000042	CG4027	14	3	3	25.5573	25.822	25.3703	25.5832	25.9294	0	25.9417	17.2904	8.29284	0.391806
137	tr|B5RIR1|B5RIR1_DROME	B5RIR1	nrv1	FBgn0015776	CG9258	3	3	3	24.4347	24.7838	24.4844	24.5676	24.2987	24.534	0	16.2776	8.29007	0.366048
138	tr|Q9VJH2|Q9VJH2_DROME	Q9VJH2	AspRS-m	FBgn0051739	CG31739	8	8	8	24.7196	24.8447	24.9635	24.8426	24.9306	0	24.7437	16.5581	8.28453	0.373641
139	tr|A4V303|A4V303_DROME	A4V303	CCT3	FBgn0015019	CG8977	8	8	8	25.1272	24.9167	24.93	24.9913	24.9339	25.1881	0	16.7073	8.28396	0.377529
140	tr|A0A0B4LFL3|A0A0B4LFL3_DROME	A0A0B4LFL3	eEF1beta	FBgn0028737	CG6341	6	6	6	24.9555	24.8435	25.0599	24.953	24.8587	0	25.1604	16.673	8.27993	0.37686
141	tr|X2JGG6|X2JGG6_DROME	X2JGG6	Hsp26	FBgn0001225	CG4183	5	5	5	25.3153	25.5924	25.1219	25.3432	25.0891	26.1178	0	17.0689	8.27425	0.387506
142	tr|A1Z7V1|A1Z7V1_DROME	A1Z7V1	brp	FBgn0259246	CG42344	15	15	15	25.3347	25.1348	25.1237	25.1977	25.0959	0	25.7877	16.9612	8.23655	0.386567
143	tr|X2JJD6|X2JJD6_DROME	X2JJD6	Dmel\CG2145	FBgn0030251	CG2145	8	8	8	24.6231	24.6938	24.8217	24.7129	24.778	24.652	0	16.4767	8.23619	0.374028
144	tr|X2JDI1|X2JDI1_DROME	X2JDI1	mts	FBgn0004177	CG7109	5	5	5	24.7874	24.8474	24.6001	24.745	25.0459	0	24.5144	16.5201	8.22485	0.375826
145	tr|Q7KUX3|Q7KUX3_DROME	Q7KUX3	Septin4	FBgn0259923	CG9699	6	6	6	24.745	24.9033	25.1768	24.9417	25.2662	0	24.9315	16.7326	8.20912	0.382119
146	tr|Q7K012|Q7K012_DROME	Q7K012	Bap55	FBgn0025716	CG6546	7	7	7	24.5787	24.396	24.5592	24.5113	24.5026	0	24.4255	16.3094	8.20196	0.371432
147	sp|Q7KUT2|LONM_DROME	Q7KUT2	Lon	FBgn0036892	CG8798	6	6	6	0	24.357	24.3609	16.2393	24.1515	0	0	8.0505	8.18881	0.513472
148	tr|M9PD08|M9PD08_DROME	M9PD08	eRF3	FBgn0020443	CG6382	3	3	3	25.0214	25.1386	0	16.72	0	25.6263	0	8.54209	8.17791	0.531425
149	tr|Q9W5X1|Q9W5X1_DROME	Q9W5X1	aspr	FBgn0031089	CG9572	10	10	10	24.7479	25.4377	24.3342	24.8399	24.7646	0	25.2264	16.6637	8.17627	0.382367
150	tr|Q9VIX3|Q9VIX3_DROME	Q9VIX3	Pax	FBgn0041789	CG31794	6	6	6	24.6281	24.6531	24.3635	24.5482	24.4688	0	24.669	16.3793	8.16897	0.375024
151	tr|Q9VSM7|Q9VSM7_DROME	Q9VSM7	S-Lap2	FBgn0052351	CG32351	6	6	3	24.6086	0	24.2367	16.2818	0	24.3514	0	8.11715	8.16462	0.516808
152	sp|Q7K0D8|NUP50_DROME	Q7K0D8	Nup50	FBgn0033264	CG2158	8	8	8	0	24.7534	24.6508	16.4681	24.9304	0	0	8.31012	8.15795	0.523995
153	tr|X2JFR6|X2JFR6_DROME	X2JFR6	eIF2alpha	FBgn0261609	CG9946	5	5	5	24.9713	24.7461	25.2066	24.9747	25.0804	25.373	0	16.8178	8.15688	0.387037
154	sp|P06604|TBA2_DROME	P06604	alphaTub85E	FBgn0003886	CG9476	10	2	2	24.151	23.8096	23.8587	23.9398	0	23.5579	23.7928	15.7836	8.15619	0.359812
155	tr|Q8T6I0|Q8T6I0_DROME	Q8T6I0	Past1	FBgn0016693	CG6148	6	6	6	23.8512	24.1721	0	16.0078	23.5901	0	0	7.86337	8.14439	0.50813
156	tr|Q9VQE0|Q9VQE0_DROME	Q9VQE0	Drp1	FBgn0026479	CG3210	8	8	8	24.7405	24.781	24.7474	24.7563	24.7621	25.0781	0	16.6134	8.1429	0.382477
157	tr|Q9V3V6|Q9V3V6_DROME	Q9V3V6	Rpt5	FBgn0028684	CG10370	5	5	4	24.8515	24.7255	24.6182	24.7317	0	25.4935	24.2898	16.5944	8.13731	0.382645
158	sp|P08646|RAS1_DROME	P08646	Ras85D	FBgn0003205	CG9375	4	4	4	24.7026	24.5562	0	16.4196	24.8501	0	0	8.28338	8.13622	0.523832
159	tr|X2JFR1|X2JFR1_DROME	X2JFR1	nonA	FBgn0004227	CG4211	4	4	4	23.7035	23.6918	24.0742	23.8232	23.4287	0	23.6533	15.694	8.12918	0.358808
160	tr|A0A0B4K6D2|A0A0B4K6D2_DROME	A0A0B4K6D2	p23	FBgn0037728	CG16817	2	2	2	24.4504	0	24.4406	16.297	0	24.5572	0	8.18575	8.11127	0.521227
161	tr|A4V2A4|A4V2A4_DROME	A4V2A4	mub	FBgn0262737	CG7437	2	2	2	24.1612	24.8761	0	16.3458	24.7489	0	0	8.24965	8.09613	0.524146
162	tr|Q8IRC2|Q8IRC2_DROME	Q8IRC2	anon-WO0140519.252	FBgn0035497	CG14995	7	7	7	23.7249	23.9093	24.3308	23.9884	23.8653	0	23.8164	15.8939	8.09446	0.366116
163	tr|Q9VKZ8|Q9VKZ8_DROME	Q9VKZ8	Usp14	FBgn0032216	CG5384	4	4	4	24.3966	24.0944	24.822	24.4377	24.0585	24.9741	0	16.3442	8.0935	0.378418
164	tr|A4V4F2|A4V4F2_DROME	A4V4F2	Flo2	FBgn0264078	CG32593	8	8	8	24.4247	24.3431	24.8056	24.5245	24.5308	0	24.7849	16.4386	8.08591	0.381006
165	tr|Q9VZJ2|Q9VZJ2_DROME	Q9VZJ2	Dmel\CG1136	FBgn0035490	CG1136	4	4	4	24.4365	24.2511	0	16.2292	0	0	24.4466	8.14888	8.08033	0.521026
166	tr|Q8IPE8|Q8IPE8_DROME	Q8IPE8	Mtpalpha	FBgn0028479	CG4389	6	6	6	0	24.0741	24.7415	16.2719	24.5799	0	0	8.19331	8.07859	0.522751
167	tr|A1Z9J6|A1Z9J6_DROME	A1Z9J6	mRpL53	FBgn0050481	CG30481	3	3	3	0	24.004	24.2186	16.0742	23.9924	0	0	7.99746	8.07674	0.515602
168	tr|Q7K304|Q7K304_DROME	Q7K304	Drep2	FBgn0028408	CG1975	7	7	7	24.7526	25.0162	25.605	25.1246	25.8743	0	25.3005	17.0583	8.0663	0.398102
169	tr|O97454|O97454_DROME	O97454	l(1)10Bb	FBgn0001491	CG1639	3	3	3	0	24.7808	23.8239	16.2015	0	0	24.4257	8.14191	8.05963	0.521642
170	tr|Q962I2|Q962I2_DROME	Q962I2	Rala	FBgn0015286	CG2849	4	4	4	23.6951	24.5344	24.4434	24.2243	24.5121	0	24.0034	16.1718	8.05247	0.375983
171	tr|A4V1Y7|A4V1Y7_DROME	A4V1Y7	Trl	FBgn0013263	CG33261	3	3	3	23.8486	24.4817	24.662	24.3308	24.539	0	24.296	16.2783	8.05244	0.378713
172	tr|Q9VJ74|Q9VJ74_DROME	Q9VJ74	Dmel\CG10333	FBgn0032690	CG10333	12	12	12	24.6238	23.9703	24.5742	24.3894	24.842	0	24.1831	16.3417	8.0477	0.380679
173	sp|P12370|KAPC1_DROME	P12370	Pka-C1	FBgn0000273	CG4379	7	7	7	24.109	24.0784	24.1876	24.125	24.2781	0	23.9618	16.08	8.04502	0.373663
174	tr|Q9W373|Q9W373_DROME	Q9W373	SmydA-9	FBgn0030102	CG12119	5	5	5	0	24.1989	24.4523	16.2171	24.5206	0	0	8.17352	8.04354	0.523276
175	tr|Q0E8E8|Q0E8E8_DROME	Q0E8E8	Mpcp2	FBgn0026409	CG4994	4	4	4	24.2137	24.1364	24.2595	24.2032	24.1166	0	24.3676	16.1614	8.04184	0.375992
176	tr|Q9W414|Q9W414_DROME	Q9W414	Rpt4	FBgn0028685	CG3455	3	3	3	24.3399	24.3997	24.5063	24.4153	24.4071	24.7998	0	16.4023	8.013	0.383913
177	tr|Q9VQ35|Q9VQ35_DROME	Q9VQ35	mRpL48	FBgn0031357	CG17642	5	5	5	24.1681	23.7091	0	15.9591	23.886	0	0	7.96198	7.99711	0.517241
178	sp|P13496|DCTN1_DROME	P13496	DCTN1-p150	FBgn0001108	CG9206	8	8	8	0	23.6006	24.249	15.9499	23.8846	0	0	7.96155	7.98832	0.517578
179	sp|Q8T3X9|ISCA1_DROME	Q8T3X9	MagR	FBgn0026666	CG8198	3	3	3	23.979	24.1305	24.3199	24.1431	0	24.3024	24.1682	16.1569	7.98629	0.378862
180	tr|O17452|O17452_DROME	O17452	Peritrophin-A	FBgn0022770	CG17058	2	2	2	24.0038	23.5066	0	15.8368	0	0	23.5865	7.86215	7.97465	0.514342
181	tr|Q9VT32|Q9VT32_DROME	Q9VT32	Prps	FBgn0036030	CG6767	5	5	5	24.5924	24.4695	24.6181	24.56	24.9837	0	24.8033	16.5956	7.96434	0.391519
182	tr|Q9VNC3|Q9VNC3_DROME	Q9VNC3	Hcs	FBgn0037332	CG14670	5	5	5	23.9709	24.0943	0	16.0217	24.2947	0	0	8.09825	7.92347	0.524985
183	tr|X2JDD7|X2JDD7_DROME	X2JDD7	Tig	FBgn0011722	CG11527	11	11	11	24.2201	0	23.6896	15.9699	0	0	24.1505	8.05017	7.91973	0.523394
184	tr|Q9W3T9|Q9W3T9_DROME	Q9W3T9	Dmel\CG3040	FBgn0029925	CG3040	2	2	2	23.716	23.9223	23.881	23.8397	24.2293	0	23.5418	15.9237	7.91603	0.376526
185	tr|X2JEU3|X2JEU3_DROME	X2JEU3	Dmel\CG1737	FBgn0030293	CG1737	7	7	7	24.3046	24.0877	24.2973	24.2299	24.5861	0	24.3675	16.3179	7.912	0.387121
186	tr|M9PG55|M9PG55_DROME	M9PG55	Dmel\CG10600	FBgn0032717	CG10600	7	7	7	24.3235	23.9391	23.9864	24.083	24.1029	24.4232	0	16.1754	7.90764	0.383641
187	tr|A0A0B4LEV8|A0A0B4LEV8_DROME	A0A0B4LEV8	coil	FBgn0033265	CG8710	6	6	6	23.7424	23.8686	23.8851	23.8321	24.0809	0	23.7329	15.9379	7.89411	0.377994
188	tr|A0A6H2EFD0|A0A6H2EFD0_DROME	A0A6H2EFD0	gish	FBgn0250823	CG6963	5	5	5	23.9446	23.6005	24.2021	23.9157	24.0662	24.0306	0	16.0323	7.88345	0.381168
189	sp|Q9W445|MCTS1_DROME	Q9W445	MCTS1	FBgn0029833	CG5941	4	4	4	24.3116	23.9288	24.4198	24.22	24.7731	24.2387	0	16.3373	7.88278	0.389336
190	tr|Q7KTA9|Q7KTA9_DROME	Q7KTA9	Gpo3	FBgn0028848	CG7311	8	8	8	25.0226	24.6427	0	16.5551	0	26.0287	0	8.67623	7.87886	0.547054
191	tr|A0A0B4LFB3|A0A0B4LFB3_DROME	A0A0B4LFB3	eIF3m	FBgn0033902	CG8309	6	6	6	24.2617	24.1763	24.3724	24.2701	24.3086	24.8976	0	16.4021	7.86805	0.391792
192	tr|Q8IPW2|Q8IPW2_DROME	Q8IPW2	dock	FBgn0010583	CG3727	4	4	4	0	23.7941	23.7969	15.8637	23.9975	0	0	7.99916	7.86451	0.523548
193	tr|Q9VDB8|Q9VDB8_DROME	Q9VDB8	BcDNA:RH37844	FBgn0038879	CG17298	2	2	2	24.1505	23.4895	0	15.88	0	0	24.082	8.02735	7.85264	0.525094
194	tr|X2J8Y6|X2J8Y6_DROME	X2J8Y6	Acp36DE	FBgn0011559	CG7157	5	5	5	24.413	24.3836	24.5901	24.4622	0	25.4559	24.3869	16.6143	7.84796	0.3986
195	tr|Q9W086|Q9W086_DROME	Q9W086	mRpL46	FBgn0035272	CG13922	7	7	7	24.1257	24.2347	23.8485	24.0696	24.0803	24.5923	0	16.2242	7.84541	0.388363
196	tr|A0A0B4KEI0|A0A0B4KEI0_DROME	A0A0B4KEI0	COX4L	FBgn0033020	CG10396	5	5	5	24.7354	0	24.6432	16.4595	0	25.848	0	8.616	7.84351	0.54631
197	tr|Q9VK69|Q9VK69_DROME	Q9VK69	CCT4	FBgn0032444	CG5525	4	4	4	23.7107	23.6822	23.7738	23.7222	23.609	24.0579	0	15.8889	7.8333	0.380011
198	tr|Q9Y162|Q9Y162_DROME	Q9Y162	Vps4	FBgn0283469	CG6842	3	3	3	0	23.2751	23.218	15.4977	22.9952	0	0	7.66507	7.83263	0.512112
199	tr|Q6NR03|Q6NR03_DROME	Q6NR03	sdt	FBgn0261873	CG32717	5	5	5	0	23.4765	23.5784	15.685	23.5713	0	0	7.85709	7.8279	0.519623
200	tr|Q9VNL0|Q9VNL0_DROME	Q9VNL0	Gasp	FBgn0026077	CG10287	4	4	4	24.4559	0	23.2486	15.9015	0	0	24.2364	8.07879	7.82269	0.528246
201	tr|Q9VEA1|Q9VEA1_DROME	Q9VEA1	eIF1A	FBgn0026250	CG8053	2	2	2	23.7813	23.5596	0	15.7803	23.9078	0	0	7.96928	7.81102	0.524468
202	tr|Q8IPP8|Q8IPP8_DROME	Q8IPP8	Dmel\CG31548	FBgn0051548	CG31548	2	2	2	22.7642	23.3688	0	15.3777	22.7282	0	0	7.57606	7.80162	0.509879
203	tr|Q95U34|Q95U34_DROME	Q95U34	Galk	FBgn0263199	CG5288	4	4	4	23.611	23.6289	23.6649	23.6349	23.3737	24.1273	0	15.8337	7.80126	0.380377
204	tr|Q9VTZ5|Q9VTZ5_DROME	Q9VTZ5	Tsf2	FBgn0036299	CG10620	6	6	6	23.8787	0	23.6137	15.8308	0	24.1639	0	8.05464	7.77615	0.528951
205	tr|Q7K1W5|Q7K1W5_DROME	Q7K1W5	Dmel\CG8187	FBgn0034027	CG8187	4	4	4	23.6262	23.6721	23.7449	23.6811	23.8897	0	23.8283	15.906	7.77506	0.383619
206	tr|Q7K188|Q7K188_DROME	Q7K188	Dmel\CG6329	FBgn0033872	CG6329	3	3	3	24.135	24.4098	24.0838	24.2095	24.561	0	24.7649	16.442	7.76755	0.398282
207	tr|Q9W204|Q9W204_DROME	Q9W204	jbug	FBgn0028371	CG30092	6	6	6	23.2846	23.6484	0	15.6444	0	0	23.6518	7.88395	7.7604	0.523216
208	tr|Q9VGZ3|Q9VGZ3_DROME	Q9VGZ3	Irp-1B	FBgn0024957	CG6342	6	6	6	23.9773	23.8119	24.0804	23.9565	23.8752	24.7275	0	16.2009	7.7556	0.392787
209	tr|B5RIU6|B5RIU6_DROME	B5RIU6	EndoA	FBgn0038659	CG14296	3	3	3	23.3823	23.527	0	15.6364	23.6863	0	0	7.89545	7.74097	0.524375
210	tr|Q9VAY2|Q9VAY2_DROME	Q9VAY2	Gp93	FBgn0039562	CG5520	7	7	7	23.917	23.61	23.7394	23.7555	23.6448	24.4039	0	16.0162	7.73924	0.388746
211	tr|Q9VEN6|Q9VEN6_DROME	Q9VEN6	mRpS11	FBgn0038474	CG5184	2	2	2	23.5935	23.1229	23.4166	23.3777	23.6562	0	23.271	15.6424	7.73528	0.378753
212	tr|Q9W2X6|Q9W2X6_DROME	Q9W2X6	ATPsyndelta	FBgn0028342	CG2968	3	3	3	23.5606	23.7478	23.3677	23.5587	23.7009	23.7822	0	15.8277	7.73099	0.383979
213	tr|A0A0B4LGC6|A0A0B4LGC6_DROME	A0A0B4LGC6	l(2)k09913	FBgn0021979	CG3082	2	2	2	23.9047	23.7366	23.6582	23.7665	24.0677	24.0812	0	16.0496	7.71685	0.390713
214	tr|M9MQH9|M9MQH9_DROME	M9MQH9	Pp2A-29B	FBgn0260439	CG17291	5	5	5	0	23.6604	23.9632	15.8745	24.4977	0	0	8.16588	7.70864	0.535594
215	sp|Q9VLN1|WDR82_DROME	Q9VLN1	Wdr82	FBgn0032030	CG17293	2	2	2	0	23.2285	23.4015	15.5433	23.5075	0	0	7.83583	7.7075	0.523415
216	tr|M9PBH8|M9PBH8_DROME	M9PBH8	FBpp0072605	FBgn0035213	CG2199	4	4	4	0	23.3099	23.6235	15.6445	23.8178	0	0	7.93928	7.70522	0.527396
217	sp|Q9NHA8|BGBP3_DROME	Q9NHA8	GNBP3	FBgn0040321	CG5008	3	3	3	0	23.2178	23.6051	15.6077	23.8523	0	0	7.95078	7.65688	0.529696
218	tr|A0A0B4LFB8|A0A0B4LFB8_DROME	A0A0B4LFB8	Opa1	FBgn0261276	CG8479	5	5	5	23.2856	23.4653	23.683	23.478	23.593	23.9083	0	15.8338	7.6442	0.389017
219	tr|B7Z0B3|B7Z0B3_DROME	B7Z0B3	AAF47782	FBgn0035452	CG10359	3	3	3	23.5495	22.639	0	15.3962	0	0	23.2989	7.76631	7.62985	0.523884
220	tr|Q9V3Y5|Q9V3Y5_DROME	Q9V3Y5	BcDNA.LD23634	FBgn0028474	CG4119	6	6	6	23.4211	23.9227	23.6575	23.6671	23.9449	24.1948	0	16.0466	7.62055	0.396083
221	sp|Q9V3S0|CP4G1_DROME	Q9V3S0	Cyp4g1	FBgn0010019	CG3972	5	5	5	0	23.6645	23.993	15.8858	0	25.5334	0	8.51115	7.37468	0.560851
222	sp|Q9VV36|RETIN_DROME	Q9VV36	retinin	FBgn0040074	CG13057	7	7	7	31.0449	30.7338	29.6217	30.4668	26.1832	29.4144	30.5043	28.7006	1.76617	0.266084
223	tr|Q9VV46|Q9VV46_DROME	Q9VV46	Cpr72Ec	FBgn0036619	CG4784	16	16	16	31.7009	31.6919	30.227	31.2066	27.4229	30.0324	31.2348	29.5634	1.64324	0.251569
224	tr|Q9VKE2|Q9VKE2_DROME	Q9VKE2	Crys	FBgn0005664	CG16963	16	16	16	32.7939	32.7449	31.6283	32.389	28.8925	31.1887	32.511	30.8641	1.52497	0.246226
225	tr|Q9VZQ7|Q9VZQ7_DROME	Q9VZQ7	Dmel\CG14961	FBgn0035439	CG14961	29	29	29	29.8868	30.3058	28.735	29.6425	29.0404	27.7367	27.8249	28.2007	1.44185	0.0841365
226	tr|A0A0B4KHM9|A0A0B4KHM9_DROME	A0A0B4KHM9	Pxd	FBgn0004577	CG3477	16	16	16	28.3721	27.905	27.3585	27.8785	26.4168	26.411	26.7365	26.5214	1.35709	0.0121615
227	tr|Q9VZG2|Q9VZG2_DROME	Q9VZG2	Cpr64Aa	FBgn0035510	CG15006	6	6	6	31.4894	30.2618	29.6503	30.4671	27.7161	29.1732	30.483	29.1241	1.34304	0.23634
228	tr|Q9W287|Q9W287_DROME	Q9W287	CG13504	FBgn0085234	CG34205	8	8	8	29.0884	28.1482	28.4732	28.5699	27.5156	27.4627	26.7261	27.2348	1.33511	0.0236638
229	sp|Q9VHP0|DDX3_DROME	Q9VHP0	bel	FBgn0263231	CG9748	15	15	15	26.9883	26.7381	27.1247	26.9504	25.9567	25.281	25.749	25.6622	1.28815	0.00496383
230	tr|Q9VZG0|Q9VZG0_DROME	Q9VZG0	Cpr64Ac	FBgn0035512	CG15008	14	14	14	31.8499	31.1964	30.4904	31.1789	29.75	30.1673	30.1561	30.0245	1.15441	0.050028
231	tr|Q7JYZ0|Q7JYZ0_DROME	Q7JYZ0	l(2)k04810	FBgn0034162	CG6426	3	3	3	27.0255	26.3724	26.2973	26.5651	24.0699	25.7947	26.6779	25.5142	1.05091	0.259228
232	tr|Q9VRJ4|Q9VRJ4_DROME	Q9VRJ4	Dhrs4	FBgn0035588	CG10672	11	11	11	26.5318	26.4845	26.5115	26.5093	26.3925	26.3029	26.3226	26.3393	0.169952	0.00505868
233	tr|Q9VFV9|Q9VFV9_DROME	Q9VFV9	Droj2	FBgn0038145	CG8863	9	9	9	26.945	27.0023	27.2083	27.0519	26.8257	26.6276	26.6933	26.7155	0.336393	0.027268
234	tr|Q9V3Z9|Q9V3Z9_DROME	Q9V3Z9	Vajk3	FBgn0028544	CG16884	14	14	14	30.8399	30.7224	30.1081	30.5568	29.3029	29.3361	30.065	29.568	0.98882	0.0424992
