# Supplementary material for: Tissue-specific O-GlcNAcylation profiling identifies substrates in translational machinery in Drosophila mushroom body contributing to olfactory learning
Source: eLife. 2024 Apr 15;13:e91269. doi: 10.7554/eLife.91269 (PMC11018347; doi:10.7554/eLife.91269)
Supplement: Supplementary file 9. [file elife-91269-supp9.xlsx]

## Sheet: Sheet1
Sequences of all the primers used in this study.
Actin-F	GCGTCGGTCAATTCAATCTT
Actin-R	AAGCTGCAACCTCTTCGTCA
Rpl5-F	CCTACGTCAATCTGATTCCACA
Rpl5-R	TGACTACCTTAACGAAACCCATT
Rps26-F	ACAGCTACTACCTACAAACAATGTA
Rps26-R	TGTAGACGGAAAGCTGCTTGAT
Rpl24-F	CGTGTTTCTACGCCAGCAAG
Rpl24-R	GGAAGGTGAACGACTTGCCA
Rps6-F	ACCGACAATATGAAGCTCAACG
Rps6-R	CATGGGGAATCCCTGCTTGT
Rpl11-F	TTACAAGTTTCCGCGAGGGAT
Rpl11-R	TTCAGGCAGAGTTTGCGGAT
Rps3-F	CCTCTTTCTTTTCTGCGCACC
Rps3-R	ATGCCATCGGAAACGAACTTG
Rpl32-F	AAGTGTGCGGCTCGTATTTC
Rpl32-R	CTTGCGCCATTTGTGCGAC
Rps28b-F	CGACCAAACTCGAGAAGACCT
Rps28b-R	TACAAAGGCGGTCCAATGCT
