# Supplementary material for: Tissue-specific O-GlcNAcylation profiling identifies substrates in translational machinery in Drosophila mushroom body contributing to olfactory learning
Source: eLife. 2024 Apr 15;13:e91269. doi: 10.7554/eLife.91269 (PMC11018347; doi:10.7554/eLife.91269)
Supplement: Supplementary file 10. [file elife-91269-supp10.xlsx]

## Sheet: Sheet1
Cell clusters in different brain regions generated from single-cell transcriptomic data.
cell clusters	brain regions
adPN	antennal lobe	brain neuron
adPN/C15	antennal lobe	brain neuron
adPN/C15&kn	antennal lobe	brain neuron
adPN/kn	antennal lobe	brain neuron
adPN/kn&CG31676	antennal lobe	brain neuron
lPN	antennal lobe	brain neuron
lPN/CG31676	antennal lobe	brain neuron
lPN/unpg	antennal lobe	brain neuron
Olfactory_projection_neurons	antennal lobe	brain neuron
Poxn	ellipsoid body	brain neuron
A/B-KC	mushroom body	brain neuron
A/B*-KC	mushroom body	brain neuron
G-KC	mushroom body	brain neuron
MBON	mushroom body	brain neuron
L1	optic lobe	brain neuron
L2	optic lobe	brain neuron
L3	optic lobe	brain neuron
L4/L5	optic lobe	brain neuron
Lamina_monopolar	optic lobe	brain neuron
Lawf1	optic lobe	brain neuron
Lawf2	optic lobe	brain neuron
LNv	optic lobe	brain neuron
Mi1	optic lobe	brain neuron
Mip	optic lobe	brain neuron
Mip/OCT	optic lobe	brain neuron
Pm1/Pm2	optic lobe	brain neuron
Pm1/Pm2/Pm3	optic lobe	brain neuron
Pm3	optic lobe	brain neuron
Pm4	optic lobe	brain neuron
Proc/Gpb5	optic lobe	brain neuron
Proc/Ms	optic lobe	brain neuron
T1	optic lobe	brain neuron
T2	optic lobe	brain neuron
T3	optic lobe	brain neuron
T4/T5	optic lobe	brain neuron
AstA/NPF		brain neuron
AstA/Nplp1		brain neuron
Astrocyte-like		brain neuron
C2		brain neuron
C3		brain neuron
Capa		brain neuron
CCAP		brain neuron
CCHa1		brain neuron
Clock		brain neuron
Crz		brain neuron
DCN		brain neuron
Dm8/Dm11		brain neuron
Dm9		brain neuron
DN1		brain neuron
Dopaminergic		brain neuron
dorsal_Fan-shaped_Body		brain neuron
FMRFa		brain neuron
Gr43a		brain neuron
Hsp		brain neuron
Hug		brain neuron
IPC		brain neuron
ITP		brain neuron
Octopaminergic		brain neuron
PAM		brain neuron
Peptidergic		brain neuron
Photoreceptors		brain neuron
Plasmatocytes		brain neuron
Serotonergic		brain neuron
Tm1/TmY8		brain neuron
Tm5ab		brain neuron
Tm5c		brain neuron
Tm9		brain neuron
TmY14		brain neuron
Tyraminergic		brain neuron
