# Supplementary material for: Tissue-specific O-GlcNAcylation profiling identifies substrates in translational machinery in Drosophila mushroom body contributing to olfactory learning
Source: eLife. 2024 Apr 15;13:e91269. doi: 10.7554/eLife.91269 (PMC11018347; doi:10.7554/eLife.91269)
Supplement: Supplementary file 11. [file elife-91269-supp11.xlsx]

## Sheet: Sheet1
The normalized O-GlcNAc levels of O-GlcNAcylated proteins in different brain regions.
Gene Symbol	Mushroom Body				Antennal Lobe				Ellipsoid Body				Optic Lobe				Brain Neuron
	O-GlcNAc level(Log2 FC)	mRNA level	Normalizing Factor	Normalized O-GlcNAc level	O-GlcNAc level(Log2 FC)	mRNA level	Normalizing Factor	Normalized O-GlcNAc level	O-GlcNAc level(Log2 FC)	mRNA level	Normalizing Factor	Normalized O-GlcNAc level	O-GlcNAc level(Log2 FC)	mRNA level	Normalizing Factor	Normalized O-GlcNAc level	O-GlcNAc level(Log2 FC)	mRNA level	Normalizing Factor	Normalized O-GlcNAc level
128up	16.3363	0.137137	0.552061	29.5915	0	0.298535	1.20179	0	7.78639	0.123183	0.495887	15.702	15.5526	0.251535	1.01258	15.3594	0	0.24841	1	0
14-3-3epsilon	17.1722	15.3675	0.983432	17.4615	0	17.2001	1.1007	0	0	11.4635	0.733597	0	0	16.1295	1.03219	0	0	15.6264	1	0
26-29-p	9.21355	0.493342	0.979843	9.40309	0	0.702116	1.39449	0	0	0.911832	1.81102	0	8.56774	0.466307	0.926148	9.25095	0	0.503491	1	0
4E-T	0	0.614357	0.818596	0	0	0.686559	0.914801	0	0	0.301559	0.401811	0	0	0.870315	1.15965	0	16.7226	0.750501	1	16.7226
abs	0	0.0895025	1.21772	0	8.2534	0.0508273	0.691527	11.935	8.41408	0.123183	1.67596	5.02047	8.52072	0.0532154	0.724018	11.7687	15.5967	0.0735002	1	15.5967
AcCoAS	15.9483	1.17021	1.34225	11.8818	0	1.95731	2.24505	0	0	0.27741	0.318192	0	0	0.707388	0.811381	0	0	0.871833	1	0
Acer	15.4265	0.201526	1.17335	13.1475	7.84056	0.119776	0.697372	11.243	15.8638	0.128279	0.746882	21.24	0	0.147844	0.860796	0	0	0.171753	1	0
Acn	0	2.21685	1.00098	0	0	1.92376	0.868642	0	7.8171	1.07743	0.486495	16.0682	0	2.51542	1.13579	0	8.08226	2.21468	1	8.08226
Acp36DE	0	1e-06	1	0	8.56872	0.0001	100	0.0856872	8.51448	0.0001	100	0.0851448	7.84796	0.0001	100	0.0784796	7.9723	1e-06	1	7.9723
Acp65Aa	0	0.00442668	4.70478	0	0	0.0001	0.106282	0	1.63448	0.0001	0.106282	15.3786	0	0.0001	0.106282	0	0	0.00094089	1	0
Acp76A	16.7803	1e-06	1	16.7803	0	0.0001	100	0	0	0.0001	100	0	0	0.0001	100	0	0	1e-06	1	0
Acsl	8.31045	0.35163	0.686501	12.1055	0	0.996149	1.94482	0	0	0.272873	0.532741	0	0	0.551469	1.07666	0	0	0.512206	1	0
Act57B	9.15953	1e-06	0.000344018	26625.1	0	0.0001	0.0344018	0	0	0.0001	0.0344018	0	0	0.0001	0.0344018	0	0	0.00290682	1	0
Act5C	0	16.3795	1.36668	0	8.17819	14.8713	1.24084	6.59084	0	17.4449	1.45558	0	8.29284	9.69523	0.808956	10.2513	0	11.9849	1	0
AGO1	0	8.09656	1.29946	0	7.893	7.02585	1.12761	6.99975	0	4.74892	0.762176	0	0	5.67179	0.910293	0	24.5901	6.23073	1	24.5901
AIMP2	0	0.305466	0.783231	0	7.54242	0.306241	0.78522	9.60549	0	0.224119	0.574654	0	0	0.392899	1.00741	0	0	0.390007	1	0
ALiX	0	0.303027	0.727887	0	0	0.849154	2.03971	0	0	0.179115	0.430244	0	0	0.489762	1.17643	0	16.7673	0.41631	1	16.7673
alpha-Cat	0	2.36153	1.237	0	0	1.33498	0.699279	0	0	1.73552	0.909089	0	0	1.76724	0.925704	0	15.2227	1.90908	1	15.2227
alphaSnap	0	3.00071	0.553995	0	0	6.52767	1.20515	0	0	2.20122	0.406392	0	0	6.90882	1.27552	0	16.9261	5.41649	1	16.9261
alpha-Spec	7.93764	1.62901	1.08048	7.3464	9.33029	2.85162	1.89141	4.93298	0	1.59203	1.05595	0	0	0.965866	0.640634	0	2.21864	1.50767	1	2.21864
alphaTub85E	15.4262	1e-06	0.000430685	35817.9	23.6175	0.0001	0.0430685	548.371	7.43397	0.0001	0.0430685	172.608	8.15619	0.0001	0.0430685	189.377	15.9156	0.00232188	1	15.9156
alt	0	1.28986	1.07225	0	16.4437	1.21332	1.00862	16.3031	8.12608	1.06894	0.888598	9.14484	16.6981	0.981376	0.815807	20.4682	0	1.20295	1	0
AMPdeam	0	0.706474	0.409737	0	0	1.5283	0.886375	0	0	1.25674	0.728876	0	0	2.76592	1.60416	0	16.0416	1.72421	1	16.0416
Ank2	8.18854	8.75447	1.18399	6.91604	15.7062	11.4723	1.55156	10.1228	7.75412	6.10141	0.825182	9.39686	0	6.71809	0.908584	0	10.8936	7.39402	1	10.8936
AnxB9	0	0.170499	0.202495	0	8.70544	0.435128	0.516785	16.8454	0	0.0001	0.000118766	0	17.297	0.0788083	0.0935976	184.802	16.8556	0.841991	1	16.8556
AP-1-2beta	16.8839	0.705738	1.09091	15.4769	0	0.722938	1.1175	0	0	0.590743	0.913156	0	0	0.602245	0.930935	0	0	0.646925	1	0
AP-1mu	17.9108	0.632943	1.01097	17.7165	0	0.576476	0.920777	0	0	0.748687	1.19584	0	0	0.710611	1.13502	0	0	0.626076	1	0
AP-2alpha	17.3807	1.12132	1.11729	15.5561	0	0.875664	0.872516	0	0	1.32097	1.31622	0	0	0.927678	0.924343	0	1.0225	1.00361	1	1.0225
AP-2mu	17.9037	0.620508	1.21336	14.7555	0	0.532275	1.04083	0	0	0.770673	1.507	0	0	0.536493	1.04908	0	15.639	0.511396	1	15.639
apolpp	8.74318	0.33191	2.49284	3.50732	0	0.0001	0.000751058	0	0	0.0001	0.000751058	0	0	0.0155474	0.11677	0	0	0.133145	1	0
aralar1	8.99404	0.2996	0.847177	10.6165	0	0.284417	0.804244	0	0	0.0751767	0.212576	0	0	0.36123	1.02145	0	0	0.353645	1	0
Arf51F	0	0.665496	0.828597	0	0	0.6888	0.857613	0	15.1419	0.432544	0.538553	28.1159	0	0.865133	1.07716	0	0	0.80316	1	0
ArgRS	14.9905	0.113621	0.914801	16.3866	0	0.163741	1.31834	0	0	0.353644	2.84731	0	0	0.114229	0.919694	0	0	0.124203	1	0
arm	0	1.88476	1.07547	0	0	1.63754	0.934399	0	0	1.19731	0.683201	0	0	1.66092	0.947739	0	16.2474	1.7525	1	16.2474
Arp1	0	1.06743	1.10434	0	0	1.1278	1.1668	0	0	1.46856	1.51934	0	0	0.889491	0.920248	0	23.6509	0.966577	1	23.6509
Arpc2	15.6021	0.302456	1.26996	12.2854	0	0.177725	0.746237	0	0	0.325777	1.36788	0	0	0.223967	0.940401	0	0	0.238161	1	0
Arr1	8.85012	0.090834	0.105046	84.2497	0.490603	0.0877017	0.101424	4.83715	0	0.0001	0.000115646	0	0	0.0874324	0.101112	0	0	0.864704	1	0
aru	0	0.0799045	1.63612	0	15.99	0.0403894	0.827011	19.3347	7.6785	0.267427	5.47583	1.40225	0	0.0115013	0.235501	0	7.85267	0.0488377	1	7.85267
Asator	0	2.65493	1.1617	0	0	2.62325	1.14784	0	0	2.12135	0.928223	0	0	2.46962	1.08061	0	16.9873	2.28539	1	16.9873
AsnRS	16.5396	0.338862	0.807079	20.4932	0	0.649202	1.54623	0	0	0.302786	0.721155	0	0	0.414238	0.986604	0	0	0.419862	1	0
AspRS-m	0	0.182171	0.95968	0	16.2984	0.283186	1.49183	10.9251	0	0.282368	1.48752	0	8.28453	0.204328	1.0764	7.69652	16.9243	0.189825	1	16.9243
Atpalpha	0	28.0456	0.839412	0	0	45.143	1.35114	0	0	29.3034	0.877058	0	0	33.8238	1.01235	0	1.18145	33.411	1	1.18145
ATPCL	8.58475	1.10575	1.26697	6.77581	16.8998	1.11139	1.27343	13.2711	0	0.555261	0.63622	0	0	0.935968	1.07244	0	10.8275	0.87275	1	10.8275
ATPsynB	0	7.3214	0.826779	0	0	10.9365	1.23501	0	0	9.08471	1.0259	0	0	9.91482	1.11964	0	8.22736	8.85533	1	8.22736
ATPsynD	8.88802	6.25646	0.776388	11.4479	0	9.74261	1.209	0	8.70867	8.5265	1.05809	8.2306	0	9.49134	1.17782	0	0	8.05842	1	0
ATPsyndelta	8.93699	4.19183	0.876492	10.1963	0	6.63841	1.38806	0	0	5.70342	1.19256	0	7.73099	5.62866	1.17693	6.5688	0	4.78251	1	0
ATPsynG	24.7908	8.40332	0.746688	33.201	0	14.7762	1.31296	0	0	13.1489	1.16836	0	0	13.1543	1.16884	0	0	11.2541	1	0
ATPsynO	8.66811	5.05327	0.749251	11.569	0	8.73843	1.29565	0	0	6.58071	0.975724	0	0	8.12778	1.20511	0	0	6.74443	1	0
Atx2	0	2.76301	1.13115	0	15.8812	3.63607	1.48857	10.6688	0	1.45109	0.594061	0	0	2.58372	1.05775	0	0	2.44266	1	0
awd	0	3.83418	0.862357	0	0	4.81575	1.08312	0	0	4.55044	1.02345	0	0	4.091	0.920118	0	7.9018	4.44617	1	7.9018
bai	0	0.82877	0.718829	0	0	1.03891	0.901094	0	0	1.98034	1.71764	0	15.711	1.23547	1.07158	14.6616	0	1.15294	1	0
Bap170	0	0.0834419	1.38935	0	0	0.121497	2.02299	0	0	0.265127	4.41451	0	0	0.0346455	0.576866	0	15.2705	0.0600581	1	15.2705
Bap55	0	0.530068	1.37397	0	7.91449	0.552343	1.43171	5.52798	7.749	0.285433	0.739863	10.4736	8.20196	0.305198	0.791096	10.3678	17.6953	0.385792	1	17.6953
Bap60	0	0.738997	1.40841	0	0	0.48852	0.931038	0	0	0.890999	1.6981	0	0	0.487673	0.929424	0	8.06414	0.524705	1	8.06414
bb8	0	1e-06	1	0	8.5255	0.0001	100	0.085255	0	0.0001	100	0	15.9042	0.0001	100	0.159042	0	1e-06	1	0
BCAS2	0	0.279245	1.06721	0	16.1464	0.105258	0.40227	40.1383	7.97758	0.179115	0.684535	11.654	0	0.277056	1.05884	0	0	0.26166	1	0
bdl	0	0.238556	0.325947	0	0	0.0252918	0.034557	0	0	0.0001	0.000136633	0	0	0.0987126	0.134874	0	8.72348	0.731885	1	8.72348
bel	9.36766	4.75527	1.23406	7.59094	0	2.86952	0.744679	0	16.9841	5.22766	1.35665	12.5192	1.28815	3.74784	0.972617	1.32442	0	3.85336	1	0
ben	24.3648	3.15767	0.974985	24.99	0	3.15375	0.973775	0	0	3.37709	1.04273	0	0	3.26369	1.00772	0	0	3.23868	1	0
betaCOP	23.9719	0.337367	1.10898	21.6162	0	0.368535	1.21143	0	0	0.123183	0.404922	0	0	0.25888	0.850981	0	0	0.304214	1	0
beta-Spec	8.23201	1.19952	1.00934	8.15584	9.38406	1.36305	1.14694	8.1818	0	1.42872	1.2022	0	0	0.952189	0.801221	0	1.36503	1.18842	1	1.36503
betaTub85D	0	0.00848153	1.3803	0	0	0.0001	0.0162742	0	0	0.0001	0.0162742	0	8.54084	0.00507063	0.825206	10.3499	0	0.00614468	1	0
betaTub97EF	9.22815	0.0201742	0.234642	39.3286	0	0.0001	0.00116308	0	0	0.0001	0.00116308	0	0	0.0211659	0.246176	0	0	0.0859786	1	0
bic	17.4299	5.57987	1.06284	16.3994	0	3.83664	0.730791	0	0	5.68285	1.08245	0	0	5.94371	1.13214	0	0	5.24998	1	0
BigH1	16.4349	1e-06	1	16.4349	0	0.0001	100	0	0	0.0001	100	0	0	0.0001	100	0	0	1e-06	1	0
Bka	16.3994	0.2531	1.00041	16.3928	0	0.162216	0.641175	0	0	0.0001	0.000395261	0	0	0.269745	1.0662	0	0	0.252998	1	0
bma	0	1.72055	1.82356	0	0	0.852152	0.903172	0	0	2.29726	2.4348	0	0	0.243024	0.257575	0	15.695	0.943511	1	15.695
brp	0	7.6737	1.53328	0	15.8119	4.68394	0.935895	16.895	17.3032	5.12842	1.02471	16.886	8.23655	4.4053	0.880219	9.35739	27.1786	5.00477	1	27.1786
bsf	15.8831	0.245051	1.00451	15.8118	16.3409	0.396928	1.62708	10.0431	7.69748	0.375486	1.53918	5.00102	0	0.241779	0.991094	0	7.88479	0.243951	1	7.88479
Bsg	0	9.99002	1.25173	0	0	8.58734	1.07598	0	0	18.0184	2.25766	0	0	7.85458	0.984163	0	8.53129	7.98097	1	8.53129
bsk	0	3.7811	1.26516	0	0	4.03031	1.34854	0	0	5.03342	1.68418	0	0	2.85799	0.956286	0	15.0388	2.98864	1	15.0388
bt	0	0.0834558	3.8787	0	9.24132	0.0001	0.00464761	1988.4	0	0.0001	0.00464761	0	9.38913	0.0001	0.00464761	2020.21	16.6625	0.0215164	1	16.6625
bur	0	0.364983	1.15467	0	16.4433	0.433255	1.37066	11.9967	0	0.0001	0.000316363	0	0	0.274037	0.866952	0	0	0.316093	1	0
Bx42	0	0.463198	0.827007	0	16.1289	0.546032	0.974901	16.5441	15.8411	0.51484	0.919211	17.2334	0	0.613235	1.09489	0	0	0.560089	1	0
by	0	1e-06	3.55061e-05	0	0	0.171647	6.09452	0	16.3861	0.0001	0.00355061	4615.02	0	0.00556135	0.197462	0	0	0.0281642	1	0
CaBP1	8.29182	0.197182	0.49155	16.8687	0	0.391752	0.976591	0	0	0.401385	1.0006	0	0	0.323423	0.806253	0	0	0.401143	1	0
CadN	0	2.17165	0.773003	0	0	4.85431	1.7279	0	0	1.56233	0.556114	0	0	2.60928	0.928778	0	25.0258	2.80937	1	25.0258
Cadps	0	4.03837	1.04814	0	0	3.98922	1.03539	0	0	3.70562	0.961781	0	0	4.64677	1.20605	0	26.1811	3.85288	1	26.1811
CalpA	0	0.373508	0.814938	0	19.688	0.500161	1.09128	18.0412	0	0.123183	0.268767	0	9.39595	0.501345	1.09386	8.58972	9.20912	0.458327	1	9.20912
CaMKI	0	1.85422	0.723323	0	0	2.43207	0.948739	0	0	1.84666	0.720375	0	0	3.57744	1.39555	0	16.4177	2.56347	1	16.4177
CaMKII	8.3416	9.51165	1.15079	7.2486	0	7.88357	0.953811	0	0	8.74978	1.05861	0	0	8.40315	1.01667	0	1.36189	8.26534	1	1.36189
CanA-14F	0	6.50501	1.49932	0	7.88173	3.78233	0.87178	9.04097	7.70492	2.91876	0.672738	11.4531	8.31203	3.8233	0.881222	9.43238	1.22117	4.33863	1	1.22117
CAP	0	0.16963	0.665768	0	0	0.187346	0.735302	0	0	0.171512	0.673155	0	0	0.0536299	0.210488	0	7.95678	0.254788	1	7.95678
Caper	16.8772	5.63225	1.32177	12.7687	0	4.56218	1.07065	0	0	3.47434	0.815354	0	0	4.08233	0.958038	0	0	4.26114	1	0
capt	0	0.589132	1.32459	0	0	0.391447	0.88012	0	0	0.259824	0.584182	0	0	0.312593	0.702827	0	17.9456	0.444765	1	17.9456
CASK	0	4.88171	0.822517	0	16.2132	5.77018	0.972214	16.6765	0	3.39938	0.572759	0	0	6.87283	1.158	0	10.5758	5.93509	1	10.5758
cathD	8.38658	1.29228	0.476223	17.6106	17.6082	2.62558	0.96756	18.1985	0	1.60468	0.591344	0	0	2.26134	0.833332	0	0	2.71361	1	0
Ccp84Ab	0	1e-06	1	0	0	0.0001	100	0	24.492	0.0001	100	0.24492	0	0.0001	100	0	0	1e-06	1	0
Ccp84Ag	0	1e-06	0.00317027	0	0	0.0001	0.317027	0	8.42839	0.0001	0.317027	26.5857	0	0.0001	0.317027	0	0	0.00031543	1	0
CCT1	8.52797	0.303417	1.07187	7.95619	16.127	0.3816	1.34806	11.9632	0	0.128279	0.453165	0	0	0.234514	0.828456	0	7.7902	0.283074	1	7.7902
CCT2	8.61485	0.324532	0.826649	10.4214	17.1138	0.650259	1.65634	10.3323	0	0.0883119	0.224949	0	0	0.302123	0.76957	0	18.1026	0.392587	1	18.1026
CCT3	9.02466	0.686127	1.35881	6.64161	16.5206	0.502087	0.994333	16.6147	8.08148	0.808759	1.60167	5.04568	8.28396	0.404749	0.801565	10.3347	8.10868	0.504949	1	8.10868
CCT4	16.5142	0.481806	1.09239	15.1175	0	0.716215	1.62386	0	7.64228	0.497972	1.12904	6.76881	7.8333	0.389421	0.882926	8.87198	7.85485	0.441057	1	7.85485
CCT5	8.51172	0.299	0.856272	9.94044	0	0.349843	1.00188	0	0	0.397192	1.13747	0	0	0.25976	0.743897	0	0	0.349188	1	0
CCT6	8.97551	0.376371	1.2217	7.34672	8.28902	0.496917	1.613	5.13889	0	0.272126	0.883321	0	0	0.20875	0.677605	0	0.398362	0.308071	1	0.398362
CCT7	9.42682	0.14994	0.885792	10.6422	7.96867	0.212001	1.25243	6.36259	0	0.255222	1.50776	0	15.6277	0.134946	0.797211	19.6029	7.94179	0.169272	1	7.94179
CCT8	8.73928	0.292071	0.764558	11.4305	17.8889	0.670832	1.75605	10.187	0	0.439916	1.15157	0	0	0.390536	1.02231	0	0.696586	0.382013	1	0.696586
CD98hc	0	2.0143	1.18862	0	7.77876	1.55934	0.920154	8.45376	7.72412	1.06454	0.628176	12.2961	16.1307	1.23004	0.725838	22.2236	17.1121	1.69465	1	17.1121
Cdc42	0	0.170202	0.809197	0	0	0.352625	1.67649	0	23.837	0.0883119	0.419864	56.7731	0	0.178001	0.846277	0	0	0.210335	1	0
Cdep	0	1.53793	1.11032	0	0	1.3115	0.946848	0	0	0.596354	0.430543	0	0	1.32296	0.955119	0	16.3763	1.38512	1	16.3763
Cep97	0	0.389733	0.980731	0	0	0.637745	1.60483	0	0	0.68305	1.71884	0	0	0.409954	1.03162	0	15.9222	0.39739	1	15.9222
cg	0	5.18942	1.25983	0	0	3.17357	0.770446	0	0	2.31183	0.561241	0	0	4.14992	1.00747	0	24.1866	4.11914	1	24.1866
CG10151	0	0.276161	1.19383	0	0	0.152305	0.658405	0	0	0.128279	0.554544	0	0	0.276171	1.19388	0	24.5685	0.231323	1	24.5685
CG10237	9.016	1e-06	4.95827e-05	181838	0	0.0001	0.00495827	0	0	0.0001	0.00495827	0	0	0.00537233	0.266374	0	0	0.0201683	1	0
CG10333	16.0026	0.395232	0.903821	17.7055	8.66989	0.494541	1.13092	7.66622	7.9747	0.643578	1.47174	5.41855	8.0477	0.485976	1.11134	7.24147	8.29437	0.437291	1	8.29437
CG10469	0	0.0230086	0.422017	0	16.8906	0.0201672	0.369902	45.6625	0	0.0001	0.00183418	0	0	0.0532844	0.977329	0	16.073	0.0545204	1	16.073
CG10513	16.1774	0.104576	0.642989	25.1598	0	0.122524	0.75334	0	0	0.0001	0.000614853	0	0	0.0895322	0.550491	0	0	0.162641	1	0
CG10527	16.037	0.262327	0.299433	53.5578	0	1.9764	2.25596	0	0	0.0883119	0.100804	0	0	0.30352	0.346453	0	7.80233	0.876079	1	7.80233
CG10600	0	0.725295	1.08777	0	7.95401	0.575501	0.863116	9.21546	7.87664	0.462873	0.694202	11.3463	7.90764	0.652521	0.978628	8.08033	7.90904	0.666771	1	7.90904
CG10737	0	0.587923	1.44839	0	16.0087	0.583986	1.43869	11.1273	7.88393	0.523207	1.28896	6.1165	16.2948	0.364465	0.897887	18.1479	0	0.405914	1	0
CG11151	7.93729	1.25621	1.00139	7.92625	0	1.08521	0.865082	0	0	2.15531	1.71811	0	0	0.865975	0.690314	0	0	1.25446	1	0
CG11334	15.9884	0.151925	1.21929	13.1128	0	0.206028	1.65351	0	0	0.159185	1.27756	0	0	0.0313637	0.251714	0	0	0.124601	1	0
CG1136	0	1e-06	1	0	15.8786	0.0001	100	0.158786	16.8154	0.0001	100	0.168154	8.08033	0.0001	100	0.0808033	0	1e-06	1	0
CG11583	19.9861	0.276674	1.07913	18.5206	0	0.369702	1.44197	0	0	0.0883119	0.344448	0	0	0.304032	1.18583	0	0	0.256387	1	0
CG11811	0	0.559704	1.44818	0	15.8185	0.358597	0.927836	17.0488	0	0.621937	1.6092	0	0	0.347839	0.9	0	0	0.386488	1	0
CG11970	0	0.0633437	1.78932	0	0	0.0522565	1.47613	0	0	0.0001	0.00282478	0	0	0.0228015	0.644092	0	16.0653	0.035401	1	16.0653
CG12163	8.43779	0.628189	0.458476	18.404	0	1.24233	0.906701	0	0	2.29635	1.67596	0	0	1.07525	0.784756	0	0	1.37017	1	0
CG1234	16.8631	0.21057	1.09747	15.3655	0	0.291403	1.51876	0	0	0.274389	1.43008	0	0	0.203893	1.06266	0	0	0.191869	1	0
CG1236	16.0237	0.109952	1.05348	15.2103	0	0.0575925	0.551809	0	0	0.114824	1.10016	0	0	0.0904474	0.866601	0	0	0.10437	1	0
CG12814	0	0.021153	1.80064	0	0	0.0001	0.00851245	0	16.1186	0.0001	0.00851245	1893.54	0	0.00402381	0.342525	0	0	0.0117475	1	0
CG13026	0	1e-06	1	0	0	0.0001	100	0	16.5524	0.0001	100	0.165524	0	0.0001	100	0	0	1e-06	1	0
CG13047	0	1e-06	1	0	17.0816	0.0001	100	0.170816	0	0.0001	100	0	16.4531	0.0001	100	0.164531	0	1e-06	1	0
CG13850	16.1065	0.218404	0.917404	17.5566	0	0.172472	0.724468	0	7.53645	0.0751767	0.315779	23.8662	0	0.272681	1.14539	0	0	0.238067	1	0
CG13887	0	1.37054	1.09771	0	15.5737	1.30012	1.04132	14.9558	0	1.65365	1.32447	0	0	1.17102	0.937916	0	0	1.24854	1	0
CG13928	0	5.79048	1.12456	0	0	6.77882	1.3165	0	8.35556	2.65796	0.516197	16.1868	0	5.27223	1.02391	0	8.03289	5.14912	1	8.03289
CG14095	7.89923	1e-06	1	7.89923	16.0249	0.0001	100	0.160249	15.7165	0.0001	100	0.157165	16.4277	0.0001	100	0.164277	0	1e-06	1	0
CG14641	0	0.730728	1.07218	0	16.5857	0.643015	0.943479	17.5793	0	0.511771	0.750909	0	16.1466	0.59412	0.871737	18.5223	7.65917	0.681536	1	7.65917
CG14712	0	0.0628281	0.738798	0	0	0.0967186	1.13732	0	0	0.0001	0.0011759	0	0	0.0829801	0.975766	0	25.0413	0.0850409	1	25.0413
CG14752	0	1e-06	0.000626115	0	0	0.0001	0.0626115	0	0	0.0001	0.0626115	0	9.02241	0.0001	0.0626115	144.102	0	0.00159715	1	0
CG14894	0	0.496726	0.927524	0	0	0.416663	0.778024	0	0	0.495205	0.924683	0	0	0.534968	0.998932	0	9.74074	0.53554	1	9.74074
CG14961	0	1e-06	0.000849156	0	0	0.0001	0.0849156	0	18.8742	0.0001	0.0849156	222.27	1.44185	0.00313999	2.66634	0.540758	0	0.00117764	1	0
CG15019	0	0.369657	0.80348	0	7.9233	0.397385	0.863748	9.17317	7.63313	0.698341	1.5179	5.02874	0	0.355699	0.773141	0	0	0.46007	1	0
CG1542	19.1618	0.0837463	0.733507	26.1235	0	0.135896	1.19027	0	0	0.0751767	0.658448	0	0	0.155452	1.36155	0	0	0.114173	1	0
CG15877	0	0.115273	1.29088	0	8.03021	0.118188	1.32353	6.06725	0	0.0001	0.00111985	0	0	0.0513776	0.575354	0	0	0.0892974	1	0
CG15894	0	0.807563	1.51137	0	0	0.847101	1.58536	0	0	0.35823	0.670434	0	0	0.432174	0.808821	0	27.8679	0.534326	1	27.8679
CG1703	17.3826	0.397125	0.925743	18.7769	0	0.451442	1.05236	0	0	0.265127	0.618041	0	0	0.446986	1.04198	0	0	0.42898	1	0
CG17097	8.511	1e-06	1	8.511	0	0.0001	100	0	0	0.0001	100	0	0	0.0001	100	0	0	1e-06	1	0
CG1737	0	0.962269	1.5814	0	15.8036	0.419151	0.688836	22.9425	0	0.679758	1.11712	0	7.912	0.557101	0.915542	8.64187	16.3499	0.608492	1	16.3499
CG17593	17.2806	0.584849	1.21334	14.2422	0	0.516004	1.07051	0	0	0.651662	1.35195	0	0	0.495221	1.02739	0	0	0.482016	1	0
CG17816	0	7.76816	1.77119	0	0	4.38502	0.999812	0	0	3.2846	0.748911	0	0	3.79231	0.864672	0	0.734016	4.38584	1	0.734016
CG1785	17.9915	0.0723695	0.762985	23.5804	0	0.0785708	0.828365	0	0	0.123183	1.29871	0	0	0.115716	1.21998	0	0	0.0948504	1	0
CG17896	0	0.197523	0.339584	0	16.1205	0.698128	1.20023	13.4312	0	0.431126	0.741199	0	0	0.482454	0.829442	0	0	0.581661	1	0
CG18598	0	0.0102558	0.0139141	0	15.9221	0.00904445	0.0122706	1297.59	7.70641	2.55019	3.45983	2.22739	0	1.06477	1.44457	0	8.01287	0.737085	1	8.01287
CG1909	0	1.89408	0.994155	0	0	2.97295	1.56043	0	0	1.81022	0.95014	0	0	2.12664	1.11622	0	16.0724	1.90522	1	16.0724
CG2004	8.13458	0.0919958	0.618174	13.1591	0	0.162296	1.09056	0	0	0.0001	0.000671959	0	0	0.108004	0.725744	0	0	0.148819	1	0
CG2145	0	0.0173543	0.376136	0	16.1808	0.102381	2.219	7.29195	0	0.0001	0.00216739	0	8.23619	0.0340766	0.738574	11.1515	7.61358	0.0461384	1	7.61358
CG3040	0	0.318618	0.792713	0	7.85915	0.343224	0.853933	9.20347	0	0.34805	0.865939	0	7.91603	0.389473	0.969	8.16928	0	0.401933	1	0
CG31195	0	0.0672901	1.33529	0	0	0.0904877	1.79562	0	0	0.0001	0.00198438	0	0	0.0466469	0.925653	0	7.4084	0.0503936	1	7.4084
CG31548	0	0.00719732	0.145596	0	0	0.0001	0.00202293	0	0	0.0001	0.00202293	0	7.80162	0.00434465	0.0878889	88.7668	0	0.0494334	1	0
CG3226	0	0.706909	1.0732	0	15.7304	0.75882	1.15201	13.6548	0	0.351176	0.53314	0	0	0.716863	1.08831	0	17.8576	0.658692	1	17.8576
CG32544	0	1.52784	0.675735	0	0	1.37685	0.608956	0	0	2.84376	1.25774	0	0	3.18265	1.40763	0	24.3136	2.261	1	24.3136
CG34034	8.12353	1e-06	1	8.12353	0	0.0001	100	0	0	0.0001	100	0	0	0.0001	100	0	0	1e-06	1	0
CG3436	8.40074	0.479128	0.94435	8.89579	0	0.63386	1.24932	0	0	0.454894	0.896586	0	0	0.531639	1.04785	0	0	0.507363	1	0
CG3609	9.38846	0.13238	0.777987	12.0676	0	0.37426	2.19949	0	0	0.0001	0.000587692	0	0	0.0970142	0.570144	0	7.92393	0.170157	1	7.92393
CG3638	0	1.41017	1.13665	0	0	1.55531	1.25364	0	0	0.398069	0.320858	0	0	1.14535	0.923191	0	24.4784	1.24064	1	24.4784
CG3703	0	0.49545	0.847869	0	0	0.585164	1.0014	0	0	0.322718	0.55227	0	0	0.68184	1.16684	0	24.0771	0.584347	1	24.0771
CG3817	18.5575	0.139119	0.650358	28.5343	0	0.196701	0.919542	0	0	0.171512	0.801786	0	0	0.265442	1.24089	0	0	0.213912	1	0
CG3860	0	0.724538	0.830335	0	0	1.12884	1.29367	0	0	1.47896	1.69492	0	0	1.04223	1.19442	0	25.856	0.872586	1	25.856
CG4038	0	0.217886	1.05597	0	0	0.237957	1.15324	0	0	0.204702	0.992072	0	0	0.148468	0.71954	0	8.36556	0.206338	1	8.36556
CG40485	0	0.0181726	0.847507	0	16.0542	0.0001	0.00466365	3442.42	0	0.0001	0.00466365	0	0	0.0136771	0.637851	0	0	0.0214424	1	0
CG4115	0	1e-06	0.000153041	0	0	0.0001	0.0153041	0	0	0.0001	0.0153041	0	0	0.0001	0.0153041	0	7.98221	0.00653418	1	7.98221
CG42713	0	1e-06	1	0	8.73903	0.0001	100	0.0873903	24.6271	0.0001	100	0.246271	0	0.0001	100	0	0	1e-06	1	0
CG42724	16.6756	2.09286	1.2535	13.3033	0	2.21172	1.32469	0	0	2.54131	1.52209	0	0	1.55993	0.934303	0	0	1.66961	1	0
CG42748	0	1.82613	1.55834	0	22.8697	0.911918	0.77819	29.3884	7.70125	1.1562	0.986645	7.80549	0	0.891172	0.760486	0	0	1.17184	1	0
CG44245	0	0.103397	0.428873	0	9.48823	0.581373	2.41143	3.93469	7.85762	0.0883119	0.366301	21.4512	0	0.210252	0.872087	0	7.70639	0.241091	1	7.70639
CG45076	0	1e-06	1	0	0	0.0001	100	0	0.787674	0.0001	100	0.00787674	0	0.0001	100	0	0	1e-06	1	0
CG4612	0	3.90206	1.06529	0	24.1952	5.35851	1.46291	16.5391	0	3.30245	0.901589	0	15.9691	3.53189	0.964227	16.5615	0	3.66292	1	0
CG46301	0	1.02301	0.821493	0	0	1.58309	1.27125	0	0	0.0883119	0.0709162	0	0	0.885428	0.711016	0	15.8488	1.2453	1	15.8488
CG4751	0	0.103864	1.07207	0	0	0.111433	1.1502	0	0	0.0001	0.00103219	0	0	0.0852327	0.879761	0	24.5023	0.0968816	1	24.5023
CG4806	18.0016	0.307054	0.99344	18.1204	0	0.287462	0.930051	0	0	0.202	0.653548	0	0	0.381543	1.23444	0	0	0.309082	1	0
CG4849	0	0.210489	1.29811	0	8.58728	0.134833	0.831532	10.3271	7.7521	0.176835	1.09056	7.10836	15.9411	0.174169	1.07412	14.8411	7.719	0.16215	1	7.719
CG4998	0	1e-06	1	0	15.433	0.0001	100	0.15433	0	0.0001	100	0	0	0.0001	100	0	0	1e-06	1	0
CG5001	0	1e-06	8.68497e-05	0	0	0.0001	0.00868497	0	8.38548	0.0001	0.00868497	965.516	0	0.00242995	0.21104	0	0	0.0115141	1	0
CG5023	16.3852	1e-06	0.00036702	44643.8	16.587	0.0302508	11.1027	1.49396	0	0.0001	0.036702	0	0	0.0001	0.036702	0	7.68135	0.00272464	1	7.68135
CG5087	0	0.0812631	0.653388	0	20.8525	0.0789025	0.634408	32.8693	9.84879	0.394309	3.1704	3.10648	0	0.12018	0.966296	0	9.75439	0.124372	1	9.75439
CG5171	8.31047	0.024236	2.54917	3.26007	0	0.0001	0.0105181	0	0	0.0001	0.0105181	0	0	0.0001	0.0105181	0	0	0.00950739	1	0
CG5466	0	0.756157	1.77429	0	0	0.722137	1.69447	0	0	0.293939	0.689716	0	0	0.351116	0.823881	0	15.997	0.426174	1	15.997
CG5641	0	0.548183	1.32641	0	0	0.297416	0.719644	0	0	0.394672	0.954969	0	15.5691	0.459154	1.11099	14.0137	24.1392	0.413282	1	24.1392
CG5787	0	0.256874	1.19041	0	8.43816	0.304491	1.41107	5.97995	9.13044	0.308663	1.43041	6.3831	0	0.205253	0.951187	0	0	0.215787	1	0
CG5958	9.51611	1e-06	1.63398e-05	582390	16.7435	0.00819766	0.133948	125	0	0.0001	0.00163398	0	0	0.0154863	0.253042	0	16.1848	0.0612004	1	16.1848
CG5973	0	0.0753523	0.387592	0	8.07928	0.181794	0.935097	8.64004	0	0.0001	0.000514372	0	0	0.1256	0.646049	0	16.5647	0.194412	1	16.5647
CG6028	15.4202	0.262282	1.0253	15.0397	0	0.217505	0.85026	0	0	0.468263	1.83051	0	0	0.216308	0.845578	0	0	0.25581	1	0
CG6055	0	1e-06	1	0	9.05596	0.0001	100	0.0905596	9.75846	0.0001	100	0.0975846	0	0.0001	100	0	0	1e-06	1	0
CG6180	0	0.96399	1.29914	0	16.9265	0.708851	0.955296	17.7186	0	2.19905	2.96359	0	0	0.631899	0.85159	0	7.72838	0.742023	1	7.72838
CG6195	0	0.387808	0.984549	0	0	0.329541	0.836623	0	0	0.0001	0.000253875	0	0	0.333338	0.846263	0	7.82753	0.393894	1	7.82753
CG6329	0	11.2359	0.865468	0	7.97569	17.3324	1.33506	5.97403	24.2271	18.75	1.44426	16.7748	7.76755	15.2484	1.17453	6.6133	17.0433	12.9825	1	17.0433
CG6330	0	0.468082	0.439414	0	16.208	1.28948	1.2105	13.3894	0	2.41742	2.26936	0	0	1.42621	1.33886	0	16.0034	1.06524	1	16.0034
CG6693	18.0122	0.632728	1.07979	16.6812	0	0.351181	0.599312	0	0	0.804033	1.37213	0	0	0.581909	0.993063	0	0	0.585973	1	0
CG6937	17.0819	0.12691	1.36604	12.5046	0	0.0809104	0.870908	0	0	0.227842	2.45246	0	0	0.0947904	1.02031	0	0	0.0929036	1	0
CG6983	0	0.312486	0.792771	0	7.99572	0.396091	1.00487	7.95693	0	1.683	4.26974	0	0	0.269832	0.684558	0	8.19921	0.394169	1	8.19921
CG7137	15.469	0.0324009	0.568727	27.1994	0	0.0952974	1.67274	0	0	0.0001	0.00175528	0	0	0.0846746	1.48628	0	0	0.0569709	1	0
CG7194	17.4776	1e-06	8.83422e-05	197840	0	0.0001	0.00883422	0	0	0.0001	0.00883422	0	0	0.0001	0.00883422	0	0	0.0113196	1	0
CG7409	0	1e-06	0.000184115	0	0	0.00934492	1.72054	0	1.41522	0.0001	0.0184115	76.866	0	0.00408067	0.751311	0	0	0.0054314	1	0
CG7675	0	1e-06	0.000215046	0	7.83727	0.0001	0.0215046	364.446	0	0.0001	0.0215046	0	15.9141	0.0001	0.0215046	740.033	0	0.00465017	1	0
CG7857	0	0.0604449	0.689375	0	8.91999	0.152874	1.74353	5.11605	8.34946	0.148943	1.69869	4.91523	0	0.0805706	0.918909	0	0	0.0876807	1	0
CG8043	0	0.166889	1.2091	0	0	0.344832	2.49829	0	0	0.261565	1.89502	0	16.1522	0.142417	1.0318	15.6544	0	0.138028	1	0
CG8187	15.6432	0.315591	0.622884	25.1141	15.5943	0.659477	1.30161	11.9807	0	0.97085	1.91617	0	7.77506	0.669068	1.32054	5.88777	15.4424	0.506661	1	15.4424
CG8192	0	1e-06	1	0	16.728	0.0001	100	0.16728	0	0.0001	100	0	17.1067	0.0001	100	0.171067	0	1e-06	1	0
CG8289	0	0.976667	1.26381	0	8.42813	0.441291	0.571034	14.7594	0	0.544476	0.704556	0	0	0.790979	1.02353	0	0	0.772793	1	0
CG8547	0	0.0387445	0.621297	0	8.81767	0.0001	0.00160358	5498.76	1.52889	0.0001	0.00160358	953.423	0	0.00396309	0.0635511	0	0	0.0623606	1	0
CG8635	15.9365	0.774468	1.27496	12.4997	0	0.642451	1.05763	0	0	1.06594	1.75478	0	0	0.616346	1.01465	0	16.185	0.607447	1	16.185
CG8888	0	1e-06	0.0038678	0	0	0.0001	0.38678	0	7.41284	0.0001	0.38678	19.1656	0	0.0001	0.38678	0	7.88832	0.000258545	1	7.88832
CG9004	15.2623	0.100626	0.769975	19.8219	0	0.11413	0.873311	0	0	0.114824	0.878618	0	0	0.175936	1.34624	0	0	0.130687	1	0
CG9132	0	1.06196	0.933422	0	0	1.26858	1.11504	0	0	1.00256	0.881216	0	0	1.09159	0.95947	0	8.25685	1.1377	1	8.25685
CG9150	0	1e-06	0.000351738	0	23.8657	0.0001	0.0351738	678.509	7.94783	0.0001	0.0351738	225.959	0	0.0001	0.0351738	0	0	0.00284303	1	0
CG9281	18.3782	0.839945	0.950754	19.3302	0	1.17346	1.32826	0	15.2058	0.614712	0.695808	21.8535	0	1.02363	1.15868	0	16.244	0.883451	1	16.244
CG9297	16.7725	1e-06	0.000310568	54006	8.83122	0.0136634	4.24343	2.08115	0	0.0001	0.0310568	0	0	0.00665886	2.06803	0	0	0.00321991	1	0
CG9391	0	1.07388	1.32378	0	0	1.06441	1.31211	0	7.42898	1.83876	2.26666	3.2775	0	0.483203	0.595651	0	25.9575	0.811219	1	25.9575
CG9394	0	1.82495	0.189912	0	0	0.389784	0.0405624	0	0	0.0751767	0.00782317	0	0	0.529027	0.0550526	0	15.3817	9.60949	1	15.3817
CG9630	17.5558	0.0529885	0.923938	19.0011	0	0.0377013	0.657382	0	0	0.0001	0.00174366	0	0	0.0777107	1.35501	0	0	0.0573506	1	0
CG9775	17.9994	1.97407	1.0823	16.6306	0	1.74787	0.958289	0	0	1.51091	0.828371	0	0	1.96582	1.07778	0	0	1.82395	1	0
CG9951	0	0.113584	0.630821	0	0	0.220219	1.22305	0	0	0.132039	0.733317	0	0	0.209498	1.1635	0	16.7766	0.180058	1	16.7766
CG9953	16.3228	0.882236	1.09684	14.8817	0	0.819418	1.01874	0	0	1.32067	1.64192	0	0	0.582493	0.724184	0	0	0.804344	1	0
Chc	16.2364	0.770724	1.10909	14.6394	0	0.711808	1.02431	0	0	0.890311	1.28118	0	0	0.553137	0.795976	0	18.2729	0.694917	1	18.2729
Chd64	16.4949	0.509917	0.214202	77.0062	8.70253	0.513197	0.21558	40.3679	0	0.763297	0.320641	0	0	1.24377	0.522473	0	16.3687	2.38054	1	16.3687
cher	0	1e-06	8.23417e-05	0	9.44936	0.0372232	3.06502	3.08297	0	0.0001	0.00823417	0	0	0.00809982	0.666953	0	16.7376	0.0121445	1	16.7376
chic	8.88234	4.69959	1.08168	8.21158	0	4.04145	0.930203	0	0	1.18281	0.272242	0	0	3.28461	0.756004	0	0	4.3447	1	0
chp	0	1e-06	4.57621e-05	0	8.12536	0.0001	0.00457621	1775.57	0	0.0001	0.00457621	0	0	0.0001	0.00457621	0	7.92552	0.0218522	1	7.92552
Chro	0	0.727157	1.12264	0	0	0.261299	0.403411	0	0	0.189098	0.291942	0	0	0.735719	1.13585	0	17.7891	0.647723	1	17.7891
cindr	0	4.0066	0.458082	0	0	7.52074	0.859861	0	0	3.98803	0.455959	0	16.6564	13.4488	1.53763	10.8325	9.3712	8.74646	1	9.3712
CkIalpha	0	3.6133	0.987383	0	23.3446	4.19222	1.14558	20.3779	0	2.67921	0.73213	0	15.4754	3.95799	1.08158	14.3082	0	3.65947	1	0
CkIIalpha	0	4.16257	1.39105	0	7.96214	3.05802	1.02193	7.7913	7.99107	3.39664	1.13509	7.04005	16.0753	2.97877	0.995444	16.1489	0	2.99241	1	0
Clic	0	0.955767	1.15951	0	0	0.875226	1.0618	0	0	0.878098	1.06528	0	15.3848	0.748032	0.907488	16.9532	0	0.824289	1	0
CLIP-190	0	3.77132	1.21434	0	0	2.27983	0.734093	0	8.67893	1.29105	0.415711	20.8773	0	2.64338	0.851154	0	0	3.10564	1	0
CNBP	0	3.61473	0.879233	0	0	5.12372	1.24627	0	16.0345	3.79592	0.923306	17.3664	0	4.5647	1.1103	0	0	4.11123	1	0
coil	0	0.187389	1.24447	0	16.2612	0.142796	0.948326	17.1473	7.70473	0.176835	1.17438	6.56067	7.89411	0.136522	0.906661	8.70679	0	0.150577	1	0
Col4a1	0	0.0185286	0.0256898	0	8.28796	0.0001	0.000138649	59776.4	18.9838	0.0001	0.000138649	136920	0	0.0246653	0.0341983	0	0	0.721244	1	0
comt	16.6146	1.64031	0.789464	21.0454	0	2.68402	1.29179	0	0	2.53664	1.22086	0	0	2.62947	1.26554	0	0	2.07775	1	0
cora	0.623689	3.66518	2.73889	0.227716	0	0.539135	0.402881	0	0	1.54316	1.15316	0	0	0.447075	0.334087	0	0	1.3382	1	0
coro	8.23598	0.669332	2.29318	3.59152	0	0.204763	0.701533	0	0	0.728722	2.49665	0	0	0.180401	0.618066	0	0	0.29188	1	0
COX4	0	8.20796	0.711745	0	0	15.2038	1.31838	0	0	11.6739	1.01229	0	9.02299	14.0606	1.21925	7.40044	0	11.5322	1	0
COX4L	0	1e-06	0.000393514	0	8.43551	0.0001	0.0393514	214.364	0	0.0001	0.0393514	0	7.84351	0.0001	0.0393514	199.32	0	0.00254121	1	0
COX5A	0	6.2633	0.712845	0	0	10.5963	1.206	0	7.98647	10.6353	1.21044	6.598	0	11.031	1.25547	0	0	8.78635	1	0
COX6B	0	10.6742	0.779584	0	0	17.1582	1.25314	0	16.0989	19.4237	1.41859	11.3485	0	16.588	1.21149	0	0	13.6922	1	0
COX7A	0	7.77583	0.807887	0	0	12.946	1.34505	0	8.11934	11.1159	1.15491	7.03028	8.40113	10.8354	1.12577	7.46256	0	9.62489	1	0
Cp1	9.35944	1.49244	0.526969	17.7609	16.6961	1.84664	0.652034	25.6062	8.10739	2.78719	0.984136	8.23808	0	1.61857	0.571506	0	7.92494	2.83212	1	7.92494
Cp190	0	0.488083	1.3978	0	0	0.365734	1.04741	0	0	0.123183	0.352778	0	0	0.338188	0.96852	0	26.6381	0.34918	1	26.6381
Cpr	8.23337	0.214904	0.742354	11.0909	0	0.496434	1.71486	0	0	0.287464	0.993003	0	0	0.27885	0.963247	0	0	0.28949	1	0
Cpr30F	0	1e-06	1	0	7.94491	0.0001	100	0.0794491	9.26675	0.0001	100	0.0926675	9.04937	0.0001	100	0.0904937	0	1e-06	1	0
Cpr47Ea	0	1e-06	1	0	0	0.0001	100	0	18.8408	0.0001	100	0.188408	9.21455	0.0001	100	0.0921455	0	1e-06	1	0
Cpr47Ee	0	1e-06	1	0	16.6315	0.0001	100	0.166315	0	0.0001	100	0	0	0.0001	100	0	0	1e-06	1	0
Cpr49Aa	0	1e-06	1	0	0	0.0001	100	0	2.41796	0.0001	100	0.0241796	0	0.0001	100	0	0	1e-06	1	0
Cpr49Ab	0	1e-06	1	0	8.46156	0.0001	100	0.0846156	24.1016	0.0001	100	0.241016	0	0.0001	100	0	0	1e-06	1	0
Cpr49Ae	0	0.00834875	0.127955	0	0	0.0001	0.00153262	0	19.6885	0.45106	6.91306	2.84802	0	0.0719382	1.10254	0	0	0.0652475	1	0
Cpr49Ag	0	1e-06	8.53918e-05	0	8.89159	0.0001	0.00853918	1041.27	0	0.0001	0.00853918	0	0	0.0245281	2.0945	0	0	0.0117107	1	0
Cpr62Bb	0	1e-06	8.7532e-05	0	17.1392	0.0001	0.0087532	1958.05	9.55303	0.0001	0.0087532	1091.38	0	0.0001	0.0087532	0	0	0.0114244	1	0
Cpr62Bc	0	1e-06	0.000246456	0	0	0.0001	0.0246456	0	0	0.0001	0.0246456	0	9.07069	0.0108188	2.66634	3.40192	0	0.00405752	1	0
Cpr64Aa	0	1e-06	1	0	0	0.0001	100	0	3.54961	0.0001	100	0.0354961	1.34304	0.0001	100	0.0134304	0	1e-06	1	0
Cpr64Ac	0	1e-06	1	0	0	0.0001	100	0	2.28494	0.0001	100	0.0228494	1.15441	0.0001	100	0.0115441	0	1e-06	1	0
Cpr64Ad	0	1e-06	0.000136177	0	0	0.0001	0.0136177	0	0	0.0001	0.0136177	0	8.96034	0.00574358	0.782141	11.4562	8.07634	0.00734341	1	8.07634
Cpr66D	0	1e-06	1	0	16.9737	0.0001	100	0.169737	17.8795	0.0001	100	0.178795	9.17152	0.0001	100	0.0917152	0	1e-06	1	0
Cpr67B	0	0.0657625	1.81783	0	8.68028	0.0001	0.00276424	3140.21	26.1457	0.0001	0.00276424	9458.56	0	0.00852165	0.235559	0	0	0.0361763	1	0
Cpr72Ec	7.74937	0.00143583	0.168402	46.0169	0	0.0001	0.0117286	0	2.53269	0.0001	0.0117286	215.942	1.64324	0.00559675	0.656419	2.50334	0	0.00852619	1	0
Cpr73D	0	1e-06	8.58843e-05	0	16.81	0.0001	0.00858843	1957.29	10.3413	0.0001	0.00858843	1204.1	9.64165	0.0001	0.00858843	1122.63	0	0.0116436	1	0
Cpr76Bd	0	1e-06	1	0	16.6385	0.0001	100	0.166385	0	0.0001	100	0	0	0.0001	100	0	0	1e-06	1	0
Cpr97Eb	0	1e-06	1	0	0	0.0001	100	0	1.72574	0.0001	100	0.0172574	0	0.0001	100	0	15.8534	1e-06	1	15.8534
CRMP	0	1.29493	1.14365	0	0	1.04228	0.920514	0	0	1.73894	1.53579	0	0	1.04955	0.926941	0	1.26904	1.13228	1	1.26904
crn	0	0.196736	0.920517	0	8.76626	0.187453	0.877082	9.9948	0	0.148943	0.696893	0	0	0.24341	1.1389	0	16.3503	0.213724	1	16.3503
Crys	0	1e-06	1	0	0	0.0001	100	0	2.68877	0.0001	100	0.0268877	1.52497	0.0001	100	0.0152497	0	1e-06	1	0
CtBP	8.82092	5.61361	1.21886	7.23705	0	4.31039	0.935893	0	0	5.27153	1.14458	0	0	4.30293	0.934273	0	0	4.60565	1	0
ctp	7.8931	33.1174	1.25066	6.31114	0	28.5761	1.07916	0	0	38.0639	1.43746	0	16.6936	22.7309	0.85842	19.4469	16.6898	26.4799	1	16.6898
Cyp12a4	0	0.0374066	0.368787	0	0	0.0001	0.000985888	0	15.4753	0.0001	0.000985888	15696.8	0	0.0101788	0.100351	0	8.27553	0.101431	1	8.27553
Cyp4g1	0	1e-06	1	0	8.47992	0.0001	100	0.0847992	0	0.0001	100	0	7.37468	0.0001	100	0.0737468	8.04019	1e-06	1	8.04019
cysu	0	1e-06	1	0	15.925	0.0001	100	0.15925	0	0.0001	100	0	16.8071	0.0001	100	0.168071	0	1e-06	1	0
Cyt-b5	0	1.34855	0.987176	0	16.1392	1.32907	0.972918	16.5884	15.6833	1.04274	0.763311	20.5464	0	0.825238	0.604096	0	0	1.36607	1	0
Cyt-c1	7.89553	2.502	0.698321	11.3064	16.0953	5.09711	1.42263	11.3137	7.85529	3.80057	1.06076	7.40534	0	4.32394	1.20683	0	0	3.58288	1	0
Cyt-c-p	0	10.9248	0.861201	0	15.8334	13.7279	1.08217	14.6311	0	14.5863	1.14984	0	0	13.7836	1.08656	0	0	12.6855	1	0
D1	0	2.37633	1.02052	0	0	3.29991	1.41716	0	9.01591	2.21645	0.951865	9.47183	8.92367	2.36351	1.01502	8.79162	0	2.32854	1	0
Dab	0	1.33154	1.29891	0	0	1.54378	1.50595	0	0	1.21808	1.18823	0	0	1.05829	1.03236	0	16.2392	1.02512	1	16.2392
Dap160	0	1.09083	1.1496	0	0	1.42514	1.50192	0	0	0.350792	0.369692	0	0	0.858992	0.905272	0	19.5518	0.948878	1	19.5518
DCP1	0	0.414082	1.2418	0	0	0.344706	1.03375	0	0	0.615832	1.84684	0	0	0.344145	1.03207	0	25.4971	0.333452	1	25.4971
DCTN1-p150	0	0.261053	1.25742	0	15.6378	0.382136	1.84064	8.49584	7.63635	0.340323	1.63924	4.65847	7.98832	0.203315	0.97931	8.15709	8.36468	0.20761	1	8.36468
deltaCOP	0	0.734478	1.17542	0	16.2643	0.439756	0.70376	23.1105	15.5701	1.23644	1.97874	7.8687	0	0.579401	0.927241	0	8.77148	0.624866	1	8.77148
dhd	16.3556	1e-06	1	16.3556	0	0.0001	100	0	0	0.0001	100	0	0	0.0001	100	0	0	1e-06	1	0
Dic1	15.8247	1.10738	1.18901	13.3092	0	0.818334	0.878653	0	0	1.57502	1.69111	0	0	0.788895	0.847044	0	0	0.931351	1	0
Dif	0	1.04764	3.26933	0	0	0.183843	0.573711	0	0	0.0001	0.000312066	0	0	0.0641451	0.200175	0	15.2249	0.320445	1	15.2249
dlg1	0	11.3431	1.62104	0	0	5.37037	0.767478	0	0	3.37901	0.482893	0	0	6.02097	0.860455	0	3.97138	6.99742	1	3.97138
Dlic	0	1.37697	0.857606	0	0	1.81514	1.1305	0	0	3.20296	1.99487	0	0	1.56733	0.976163	0	16.0124	1.6056	1	16.0124
DnaJ-1	16.0889	11.08	1.66278	9.67588	0	3.04689	0.457246	0	0	19.9181	2.9891	0	24.3931	5.89365	0.884458	27.5798	0	6.66357	1	0
DnaJ-H	0	0.77012	0.511224	0	0	2.24865	1.49271	0	0	1.32797	0.881538	0	0	1.80232	1.19642	0	16.3292	1.50642	1	16.3292
dnc	0	18.1635	1.63321	0	17.2174	10.8526	0.975833	17.6438	0	11.5239	1.03619	0	8.50713	8.87326	0.797859	10.6625	10.1019	11.1213	1	10.1019
Doa	10.071	0.640401	1.11393	9.04092	8.1533	0.639165	1.11178	7.33356	0	0.607351	1.05644	0	0	0.588012	1.0228	0	7.75436	0.574903	1	7.75436
dock	0	0.793082	1.52878	0	0	0.513544	0.989933	0	0	0.334039	0.643911	0	7.86451	0.464655	0.895692	8.78037	0	0.518767	1	0
dod	15.2831	1.01883	1.14733	13.3205	0	1.06952	1.20442	0	0	0.978269	1.10166	0	0	0.763476	0.859775	0	0	0.887995	1	0
Dp1	9.16163	0.316513	0.745992	12.2811	9.26491	0.470058	1.10789	8.3627	0	0.132039	0.311205	0	0	0.404902	0.954318	0	1.02741	0.424284	1	1.02741
DppIII	24.5895	0.249217	0.876404	28.0572	0	0.446521	1.57025	0	0	0.468263	1.64671	0	0	0.230052	0.809007	0	0	0.284363	1	0
Dref	0	0.153868	1.06673	0	15.8441	0.110415	0.765476	20.6983	0	0.0001	0.000693274	0	0	0.14904	1.03325	0	15.8928	0.144243	1	15.8928
Drep2	0	2.55397	1.20042	0	24.4773	2.07646	0.975984	25.0796	16.0165	1.84286	0.866187	18.4908	8.0663	2.34762	1.10344	7.31016	11.0779	2.12756	1	11.0779
drk	0	0.687873	1.04529	0	0	0.724623	1.10114	0	0	0.737276	1.12036	0	0	0.455347	0.691945	0	7.93257	0.658068	1	7.93257
Droj2	10.6276	1.74379	0.833715	12.7473	0.501883	3.03176	1.4495	0.346245	0	2.06335	0.9865	0	0.336393	2.31487	1.10675	0.303946	0.726278	2.09159	1	0.726278
Drp1	0	0.612012	0.950479	0	24.2573	1.1693	1.81596	13.3578	7.713	0.685734	1.06497	7.24244	8.1429	0.716959	1.11346	7.31312	1.71029	0.643899	1	1.71029
dsh	0	0.289577	1.36485	0	0	0.254056	1.19743	0	0	0.113688	0.53584	0	0	0.182664	0.86094	0	25.6702	0.212168	1	25.6702
Dsp1	0	7.57641	1.20702	0	0	4.64779	0.740454	0	0	3.88563	0.619033	0	0	6.89334	1.0982	0	25.8248	6.27694	1	25.8248
dy	0	1e-06	0.000207728	0	16.2032	0.0001	0.0207728	780.021	7.4359	0.0001	0.0207728	357.964	0	0.00238795	0.496043	0	0	0.00481399	1	0
Dyb	0	2.12462	1.54645	0	0	1.35932	0.989411	0	0	2.31036	1.68165	0	0	1.34445	0.978589	0	26.1967	1.37387	1	26.1967
Dys	0	0.485096	1.01764	0	0	0.722366	1.51539	0	0	0.0751767	0.157707	0	0	0.49712	1.04287	0	25.579	0.476685	1	25.579
e	0	0.0395369	0.0658307	0	0	0.0001	0.000166504	0	0	0.0001	0.000166504	0	0	0.0335772	0.0559075	0	8.08342	0.600584	1	8.08342
E(bx)	0	1.55646	1.13111	0	0	1.80645	1.31278	0	0	0.761464	0.553369	0	0	1.40023	1.01757	0	15.2922	1.37605	1	15.2922
Eaat1	0	0.324289	0.0657817	0	0	0.0740377	0.0150185	0	0	0.0001	2.02849e-05	0	0	7.77934	1.57803	0	8.34861	4.92977	1	8.34861
EbpIII	0	0.0878392	0.753652	0	15.5697	1.27632	10.9507	1.4218	0	0.0001	0.00085799	0	0	0.0336895	0.289052	0	0	0.116551	1	0
Ect3	15.1093	0.0188936	0.124361	121.496	0	0.0001	0.000658219	0	0	0.0001	0.000658219	0	0	0.00792941	0.0521929	0	0	0.151925	1	0
Edc3	0	0.798841	1.15625	0	0	0.843876	1.22143	0	0	0.129525	0.187476	0	0	0.683079	0.988694	0	25.0408	0.69089	1	25.0408
eEF1alpha2	8.41214	10.7302	1.41923	5.92726	0.913769	8.2112	1.08606	0.841364	0	13.6801	1.8094	0	0	7.43999	0.984052	0	0	7.56057	1	0
eEF1beta	8.60273	2.13174	0.762319	11.2849	0	3.5047	1.2533	0	16.8763	3.8635	1.3816	12.215	8.27993	2.20566	0.788753	10.4975	0	2.79639	1	0
eEF1gamma	0	0.928602	0.69656	0	0.417714	1.24872	0.936682	0.445951	0	1.23253	0.92454	0	0	1.06753	0.800773	0	0	1.33313	1	0
eEF5	9.33979	3.67034	1.23687	7.55112	16.7044	1.57967	0.532334	31.3795	16.2806	5.597	1.88614	8.63169	0	2.01577	0.679298	0	8.61287	2.96743	1	8.61287
eIF1A	0	5.41845	0.877242	0	23.7124	5.36667	0.868859	27.2915	23.3257	5.19592	0.841214	27.7286	7.81102	6.95078	1.12532	6.94113	0	6.17669	1	0
eIF2alpha	8.43944	0.526392	0.761912	11.0767	24.288	0.54125	0.783418	31.0026	24.3478	0.647397	0.937058	25.9832	8.15688	0.78462	1.13568	7.18239	0	0.690883	1	0
eIF2Bdelta	16.1501	0.215037	1.10032	14.6776	0	0.0398285	0.203798	0	0	0.0883119	0.451882	0	0	0.227408	1.16362	0	0	0.195431	1	0
eIF2beta	16.5443	1.48419	1.15106	14.3731	0	1.11086	0.861528	0	0	1.18035	0.91542	0	0	1.14797	0.890307	0	0	1.28941	1	0
eIF2Bgamma	16.5262	0.228567	0.840901	19.653	0	0.290383	1.06832	0	0	0.241967	0.890202	0	0	0.324345	1.19327	0	0	0.271812	1	0
eIF2gamma	8.67913	0.42628	1.03505	8.38523	16.6975	0.463687	1.12588	14.8307	7.48671	0.243446	0.591112	12.6655	0	0.392733	0.953594	0	8.49233	0.411845	1	8.49233
eIF3a	9.57139	0.781502	0.995765	9.6121	0	0.757273	0.964893	0	0	0.88512	1.12779	0	0	0.923091	1.17617	0	0	0.784826	1	0
eIF3b	16.5614	1.21123	1.26152	13.1281	15.6593	0.81871	0.8527	18.3644	0	1.64102	1.70915	0	0	0.972268	1.01263	0	0	0.960139	1	0
eIF3c	9.01061	0.861257	1.13854	7.91421	0	0.976654	1.29108	0	0	0.80915	1.06965	0	0	0.723059	0.955846	0	0	0.75646	1	0
eIF3d1	0	0.748534	0.988074	0	8.29549	0.684569	0.903639	9.18008	8.05244	1.21957	1.60985	5.002	0	0.845893	1.11659	0	0	0.757569	1	0
eIF3e	16.6382	1.39678	1.45388	11.4441	0	0.619283	0.644596	0	0	1.33491	1.38947	0	0	0.80356	0.836405	0	0	0.960731	1	0
eIF3f1	0	2.64654	0.836092	0	0	2.99249	0.945381	0	0	2.14914	0.678951	0	15.8036	3.489	1.10224	14.3377	7.95372	3.16537	1	7.95372
eIF3g1	0	1.66209	1.01158	0	0	1.6813	1.02327	0	15.6602	1.10503	0.672544	23.285	0	1.63913	0.99761	0	0	1.64306	1	0
eIF3h	16.043	1.82178	1.08625	14.7691	0	0.956082	0.570074	0	0	2.24874	1.34083	0	0	1.70091	1.01418	0	0	1.67712	1	0
eIF3i	8.39549	3.16017	1.08797	7.71668	16.155	3.12414	1.07556	15.02	7.8782	2.61533	0.900393	8.74974	16.1829	3.08118	1.06077	15.2558	0	2.90466	1	0
eIF3k	16.5532	1.48377	0.710467	23.2991	0	1.93266	0.92541	0	0	1.40637	0.673408	0	0	2.2975	1.1001	0	7.81819	2.08844	1	7.81819
eIF3l	9.54602	1.72841	0.926127	10.3075	0	1.73123	0.927638	0	0	1.63103	0.87395	0	0	2.26967	1.21615	0	0	1.86627	1	0
eIF3m	17.4614	4.04623	0.833899	20.9395	0	3.96641	0.817448	0	7.56633	5.09007	1.04903	7.21271	7.86805	5.83331	1.2022	6.54468	15.3968	4.85218	1	15.3968
eIF4E1	0	2.36664	0.711238	0	0	3.22428	0.968981	0	0	1.94416	0.584271	0	0	3.81381	1.14615	0	15.3537	3.3275	1	15.3537
eIF4G1	16.0788	1.08947	0.868417	18.515	16.5512	2.08293	1.6603	9.9688	16.0032	1.47457	1.17537	13.6154	8.33178	1.16578	0.929236	8.96627	16.8306	1.25455	1	16.8306
eIF4H1	0	1.39607	0.964278	0	16.1803	1.95123	1.34773	12.0056	15.6655	1.60484	1.10848	14.1324	8.57524	1.43666	0.992319	8.64162	0	1.44778	1	0
eIF5B	15.7067	1.63611	1.31075	11.983	0	1.18379	0.948382	0	0	1.41818	1.13615	0	0	1.11651	0.894476	0	0	1.24822	1	0
Eip63E	0	3.02614	0.91934	0	15.5643	3.30893	1.00525	15.483	0	1.75097	0.531943	0	0	3.70328	1.12506	0	0	3.29164	1	0
elav	0	7.90622	1.31893	0	0	5.10146	0.851034	0	0	7.93249	1.32331	0	0	5.93875	0.990713	0	16.3278	5.99442	1	16.3278
EndoA	0	2.56357	0.924948	0	7.62438	2.90952	1.04977	7.26293	0	3.51959	1.26988	0	7.74097	3.18528	1.14926	6.73561	9.03618	2.77159	1	9.03618
EndoB	0	0.537071	0.604883	0	0	1.20948	1.36219	0	0	1.02737	1.15709	0	0	1.15983	1.30627	0	18.6904	0.887893	1	18.6904
Eps-15	0	0.645109	1.07008	0	0	1.09773	1.82087	0	0	1.47101	2.44005	0	0	0.517513	0.858428	0	19.7148	0.602861	1	19.7148
eRF3	15.9473	0.301307	1.08195	14.7394	0	0.247116	0.887359	0	0	0.312281	1.12136	0	8.17791	0.320091	1.1494	7.11494	17.9216	0.278485	1	17.9216
exu	24.7435	1e-06	0.00013755	179888	0	0.0001	0.013755	0	0	0.0001	0.013755	0	0	0.018268	2.51276	0	0	0.0072701	1	0
fabp	0	0.896853	0.966215	0	0	1.17479	1.26565	0	0	0.641863	0.691504	0	15.7721	0.492443	0.530529	29.729	0	0.928213	1	0
fand	0	0.083679	0.662304	0	8.13791	0.14526	1.14971	7.07825	0	0.0001	0.000791482	0	0	0.138676	1.09759	0	16.3862	0.126345	1	16.3862
Fas1	0	4.04796	0.90409	0	0	6.62372	1.47937	0	0	4.44718	0.993254	0	0	5.16333	1.1532	0	0.659103	4.47739	1	0.659103
Fas3	0	0.722085	0.48163	0	0	1.45151	0.968155	0	0	0.171512	0.114398	0	0	1.9609	1.30792	0	8.33997	1.49925	1	8.33997
FASN1	9.34861	0.42	0.995179	9.3939	0	0.798067	1.891	0	0	0.332981	0.788989	0	0	0.310706	0.736208	0	0	0.422035	1	0
fau	0	1e-06	1	0	0	0.0001	100	0	1.49615	0.0001	100	0.0149615	0	0.0001	100	0	0	1e-06	1	0
fax	8.91643	9.04523	1.25798	7.08792	0	5.05108	0.702484	0	0	6.40053	0.89016	0	0	4.18242	0.581674	0	16.3892	7.19031	1	16.3892
Fbp1	1.29573	1e-06	0.000466622	2776.82	0	0.0001	0.0466622	0	15.9324	0.0001	0.0466622	341.442	0	0.0001	0.0466622	0	8.71899	0.00214306	1	8.71899
Fer2LCH	0	8.09604	0.705137	0	0	11.323	0.98619	0	7.98658	12.3515	1.07577	7.42404	0	9.36491	0.815652	0	0	11.4815	1	0
Fib	0	0.140016	0.730671	0	0	0.138816	0.724407	0	0	0.0001	0.000521847	0	0	0.211134	1.10179	0	8.28793	0.191627	1	8.28793
fidipidine	0	0.186844	0.604991	0	0	0.345481	1.11865	0	0	0.261565	0.846934	0	0	0.361384	1.17014	0	24.2534	0.308837	1	24.2534
Fim	16.1748	3.8836	0.763512	21.1847	0	3.92394	0.771443	0	0	0.852156	0.167533	0	0	6.49869	1.27764	0	0	5.0865	1	0
Fit1	0	0.191064	1.05493	0	0	0.437914	2.41789	0	7.39081	0.159185	0.87892	8.40897	0	0.104157	0.575092	0	0	0.181114	1	0
fln	9.43358	1e-06	1	9.43358	0	0.0001	100	0	0	0.0001	100	0	0	0.0001	100	0	0	1e-06	1	0
Flo1	0	1.76142	1.30472	0	8.15476	0.644545	0.477429	17.0806	0	1.83648	1.36032	0	0	1.19601	0.88591	0	0.813171	1.35003	1	0.813171
Flo2	0	1.05186	0.908967	0	15.7382	0.98441	0.85068	18.5008	0	0.343024	0.296425	0	8.08591	1.27313	1.10018	7.34964	0	1.1572	1	0
flr	9.00643	0.107576	0.607664	14.8214	0	0.181651	1.02609	0	0	0.0001	0.00056487	0	0	0.188876	1.06691	0	0	0.177032	1	0
flw	16.3905	5.61427	0.623971	26.2681	0	6.91248	0.768254	0	0	4.08729	0.454262	0	0	9.16308	1.01839	0	0	8.99765	1	0
Fmr1	0	0.783922	1.17503	0	0	0.810388	1.2147	0	8.38159	0.569951	0.854307	9.81098	0	0.539765	0.809061	0	7.81477	0.667151	1	7.81477
fon	0	0.0170099	4.70478	0	16.3691	0.0001	0.027659	591.819	0	0.0001	0.027659	0	0	0.0001	0.027659	0	0	0.00361546	1	0
futsch	25.0959	14.6443	0.986454	25.4405	0	24.9453	1.68034	0	0	16.9376	1.14093	0	0	14.4232	0.971559	0	2.26538	14.8454	1	2.26538
g	16.4601	0.855333	1.39684	11.7838	0	0.640115	1.04537	0	0	0.28871	0.471491	0	0	0.448847	0.733009	0	0	0.612334	1	0
Gabat	8.71218	2.72844	0.875436	9.95182	0	5.01833	1.61016	0	0	5.8073	1.86331	0	0	2.89492	0.928853	0	0	3.11666	1	0
Gad1	0	0.634295	0.176958	0	0	0.0510229	0.0142346	0	0	29.4416	8.21373	0	0	7.0942	1.97917	0	7.44403	3.58444	1	7.44403
Gale	1.66176	0.458858	0.96202	1.72736	15.8435	0.505729	1.06029	14.9426	7.87403	0.841818	1.76492	4.46142	15.9245	0.456103	0.956244	16.6531	7.70793	0.476973	1	7.70793
Galk	8.20457	0.206685	1.47746	5.55314	15.6812	0.0721595	0.515823	30.4004	0	0.504173	3.60402	0	7.80126	0.123952	0.886052	8.80452	7.84003	0.139892	1	7.84003
Galphao	8.40996	5.56312	0.939375	8.95272	0	4.92387	0.831434	0	0	4.68823	0.791644	0	0	6.33777	1.07018	0	0	5.92215	1	0
gammaCOP	15.6782	0.239216	1.0763	14.5668	0	0.136409	0.613745	0	0	0.148943	0.670136	0	0	0.241322	1.08578	0	0	0.222257	1	0
Gapdh1	0	1.83031	0.460161	0	9.39575	3.58804	0.902076	10.4157	0	1.69403	0.425898	0	0	3.82057	0.960537	0	0	3.97754	1	0
Gasp	0	1e-06	5.63466e-05	0	0	0.0132149	0.744616	0	0	0.0001	0.00563466	0	7.82269	0.0001	0.00563466	1388.32	0	0.0177473	1	0
Gat	0	0.654318	0.148656	0	15.4639	0.207435	0.0471276	328.127	15.4758	0.239518	0.0544166	284.395	0	0.299245	0.0679863	0	17.9825	4.40156	1	17.9825
Gbeta13F	0	18.9411	1.33288	0	7.77932	12.7067	0.894172	8.70003	7.87675	19.0287	1.33905	5.88234	0	13.0423	0.917788	0	0	14.2106	1	0
Gbeta5	0	1.80393	0.943679	0	0	2.12184	1.10999	0	0	1.8454	0.965376	0	0	1.86553	0.975904	0	24.7949	1.91159	1	24.7949
Gbeta76C	8.73797	0.0184682	0.116628	74.9216	0	0.0001	0.000631509	0	0	0.0001	0.000631509	0	0	0.00903496	0.0570565	0	0	0.158351	1	0
GC1	16.0205	0.446148	0.496556	32.2633	0	0.684905	0.762288	0	0	2.18383	2.43057	0	0	1.21227	1.34923	0	0	0.898485	1	0
Gdi	8.94858	1.40961	0.918761	9.73983	0	1.24964	0.814499	0	0	1.11476	0.726582	0	0	1.12155	0.731012	0	0	1.53425	1	0
gek	0	0.125496	0.681881	0	0	0.183977	0.999642	0	0	0.150353	0.816946	0	0	0.217363	1.18105	0	16.0544	0.184043	1	16.0544
Gel	0	0.194532	0.745595	0	7.79739	0.138582	0.531152	14.6801	0	0.0001	0.000383276	0	0	0.0851082	0.326199	0	7.89498	0.260909	1	7.89498
gfzf	0	0.0625794	1.23993	0	23.614	0.0331149	0.656129	35.9898	0	0.0001	0.00198137	0	0	0.0447546	0.886755	0	16.0013	0.0504701	1	16.0013
gish	0	9.12341	1.58059	0	16.207	4.63529	0.803043	20.182	0	6.5777	1.13956	0	7.88345	5.56459	0.964038	8.17753	8.58084	5.77216	1	8.58084
Glt	0	0.0310096	0.346359	0	0	0.0001	0.00111694	0	2.81365	0.0001	0.00111694	2519.07	9.40216	0.00786079	0.0878003	107.086	0	0.0895304	1	0
GluClalpha	0	4.0107	0.775624	0	0	7.93945	1.5354	0	0	0.159185	0.0307846	0	0	6.47874	1.25291	0	23.7781	5.17093	1	23.7781
GlyS	9.51383	0.0686224	0.304624	31.2314	15.9179	0.404574	1.79596	8.86317	0	0.0001	0.000443913	0	0	0.183505	0.814602	0	16.6923	0.225269	1	16.6923
GNBP3	0	1e-06	8.30729e-05	0	16.1634	0.147453	12.2493	1.31953	15.8346	0.0001	0.00830729	1906.11	7.65688	0.0108092	0.897954	8.52702	0	0.0120376	1	0
Gp93	8.50062	0.348219	1.16908	7.2712	23.3844	0.198225	0.665502	35.138	0	0.595591	1.99958	0	7.73924	0.209383	0.702963	11.0095	7.84342	0.297857	1	7.84342
GstD1	0.464721	1.47603	1.14671	0.405263	0	0.406173	0.315551	0	0	0.453618	0.352411	0	0	0.305396	0.237259	0	0	1.28718	1	0
GstE11	15.5639	0.0074195	0.234228	66.4475	0	0.0709085	2.23853	0	0	0.176835	5.58254	0	0	0.0123946	0.391289	0	7.5467	0.0316764	1	7.5467
GstE12	0	0.271822	0.287611	0	23.827	0.749368	0.792897	30.0506	0	0.224119	0.237138	0	15.9924	0.264818	0.280201	57.075	0	0.945102	1	0
GstE3	16.1635	0.0409507	0.277769	58.1907	0	0.0001	0.0006783	0	0	0.0001	0.0006783	0	0	0.0451108	0.305987	0	0	0.147427	1	0
GstE9	8.05988	0.0578321	1.20226	6.70393	0	0.250532	5.20827	0	0	0.0001	0.00207888	0	0	0.00414006	0.086067	0	0	0.0481028	1	0
GstZ2	0	0.179849	0.88324	0	0	0.286209	1.40558	0	0	0.294695	1.44725	0	0	0.220714	1.08393	0	16.392	0.203624	1	16.392
gw	0	4.2315	1.23374	0	0	3.32581	0.969678	0	0	3.47032	1.01181	0	0	3.26299	0.951363	0	24.3799	3.42981	1	24.3799
Gyf	0	1.4836	1.184	0	0	1.70205	1.35833	0	0	1.23573	0.986182	0	0	1.20503	0.961678	0	25.0042	1.25305	1	25.0042
Hasp	0	4.11812	0.421487	0	0	9.38706	0.960757	0	0	4.41621	0.451996	0	0	12.1468	1.24321	0	16.0886	9.77048	1	16.0886
Hcf	0	1.29553	1.05369	0	16.1271	0.926006	0.753148	21.4129	0	0.958522	0.779595	0	0	1.30774	1.06362	0	18.5692	1.22951	1	18.5692
Hcs	0	0.136277	0.942259	0	8.83836	0.154364	1.06732	8.28089	7.86333	0.569725	3.93925	1.99615	7.92347	0.127078	0.878654	9.01773	16.4879	0.144628	1	16.4879
HDAC1	0	0.562299	1.41911	0	0	0.148267	0.37419	0	0	0.255222	0.644121	0	0	0.32125	0.810759	0	24.142	0.396233	1	24.142
Hel25E	8.47763	1.36404	1.45681	5.8193	16.3954	0.851493	0.909408	18.0286	7.99586	1.28936	1.37705	5.8065	0	0.800171	0.854595	0	16.6795	0.936316	1	16.6795
hfp	19.6032	4.34463	0.935755	20.9491	0	5.01548	1.08024	0	0.42874	4.28109	0.922069	0.464975	0	5.0089	1.07882	0	0	4.64292	1	0
HIP-R	0	0.630686	0.986156	0	15.1419	0.642021	1.00388	15.0833	0	0.647132	1.01187	0	15.3078	0.684327	1.07003	14.306	16.5529	0.63954	1	16.5529
His2Av	0	2.10472	1.10144	0	0	1.46962	0.769081	0	8.83483	0.607731	0.318037	27.7793	0	2.11518	1.10691	0	0	1.91088	1	0
Hmu	8.5108	0.333251	1.03618	8.21362	0	0.431917	1.34296	0	0	0.704429	2.19029	0	0	0.318793	0.991226	0	0	0.321615	1	0
Hn	0	0.00630863	0.467848	0	16.8312	0.0001	0.007416	2269.58	8.24845	0.0001	0.007416	1112.25	16.4012	0.00942688	0.699097	23.4606	16.6586	0.0134844	1	16.6586
HnRNP-K	0	1.42945	0.925905	0	7.9458	1.2485	0.808696	9.82546	15.6963	1.76938	1.14609	13.6955	0	1.73998	1.12704	0	0	1.54384	1	0
homer	0	0.335966	0.636557	0	8.10398	0.750202	1.42141	5.70135	7.90165	0.132039	0.250176	31.5844	0	0.567943	1.07609	0	18.5978	0.527786	1	18.5978
Hrb27C	16.9893	14.0441	1.16447	14.5897	16.9737	14.6203	1.21225	14.0018	9.02203	12.5711	1.04234	8.65556	0	11.934	0.989513	0	0	12.0605	1	0
Hrb87F	15.4718	1.04272	1.13683	13.6096	0	0.867323	0.945599	0	0	1.37762	1.50195	0	0	0.87458	0.95351	0	0	0.917221	1	0
Hsc70-1	17.7227	1e-06	0.00287417	6166.2	0	0.0106581	30.6333	0	0	0.0001	0.287417	0	0	0.0001	0.287417	0	0	0.000347926	1	0
Hsc70-4	0	5.95968	1.07064	0	0.29136	5.0074	0.899569	0.323889	0	9.9664	1.79044	0	0	5.2856	0.949546	0	0.453695	5.56645	1	0.453695
Hsc70-5	8.69411	1.08032	0.969781	8.96502	8.57005	1.72561	1.54904	5.53248	0	2.42048	2.17282	0	0	1.3629	1.22345	0	8.38794	1.11398	1	8.38794
Hsp23	8.49131	21.3823	2.08457	4.07341	8.69381	10.1557	0.990089	8.78083	0	34.0725	3.32176	0	0	5.62312	0.548202	0	17.2832	10.2574	1	17.2832
Hsp26	0	41.4645	1.75204	0	0	17.3556	0.733342	0	8.05233	90.0693	3.80578	2.11582	8.27425	21.0883	0.891062	9.28584	0	23.6665	1	0
Hsp27	17.2471	9.75178	2.12899	8.10108	0	4.23988	0.925642	0	0	33.144	7.23593	0	0	2.98672	0.652056	0	0	4.58047	1	0
Hsp60A	0	3.55272	0.812331	0	0	5.92738	1.3553	0	7.61112	4.8807	1.11597	6.82016	0	5.52203	1.26261	0	0	4.37349	1	0
Hsp68	9.48375	12.394	1.29476	7.32473	0	5.64776	0.590002	0	0	34.6495	3.61972	0	0	10.2919	1.07516	0	0	9.57243	1	0
Hsp83	1.05034	26.0805	1.39932	0.75061	0	12.4346	0.667164	0	0	24.9169	1.33689	0	0	18.1487	0.973749	0	0	18.638	1	0
hts	9.12004	1.65744	0.993037	9.18399	0.490645	1.58461	0.949399	0.516795	0	2.6419	1.58287	0	0	1.67857	1.00569	0	0.749561	1.66906	1	0.749561
Ibf1	0	0.396729	1.36806	0	0	0.210316	0.725242	0	15.9169	0.228745	0.788792	20.1788	0	0.26299	0.906882	0	0	0.289994	1	0
ics	16.0736	0.401443	1.30257	12.3399	16.2403	0.32365	1.05015	15.4647	8.09233	0.406682	1.31957	6.13257	0	0.150269	0.487578	0	15.6064	0.308194	1	15.6064
Idh	0.759544	0.631886	1.16537	0.651761	8.06831	0.507179	0.935376	8.62573	8.21213	0.643573	1.18692	6.91883	0	0.296775	0.547335	0	16.8079	0.542219	1	16.8079
if	0	1e-06	0.000176538	0	15.8068	0.0111692	1.97178	8.01648	24.8482	0.0001	0.0176538	1407.53	16.1455	0.0001	0.0176538	914.565	0	0.00566451	1	0
igl	0	13.8996	1.32504	0	0	18.049	1.7206	0	0	5.59974	0.53382	0	0	11.561	1.1021	0	7.79417	10.4899	1	7.79417
Ilk	16.3947	0.234547	0.801972	20.443	7.63491	0.156218	0.534147	14.2936	0	0.56261	1.9237	0	0	0.324344	1.10901	0	0	0.292463	1	0
Imp	0	8.99292	2.60542	0	15.4627	0.511759	0.148266	104.29	0	1.13752	0.32956	0	0	0.812207	0.235311	0	0	3.45162	1	0
inaD	17.5415	1e-06	1.30164e-05	1.34764e+06	0	0.0001	0.00130164	0	0	0.0001	0.00130164	0	0	0.0360189	0.468839	0	0	0.0768259	1	0
Inx2	0	0.154908	0.22883	0	8.11694	0.161727	0.238902	33.9761	7.99962	0.0001	0.000147719	54154.2	0	0.0724402	0.107008	0	0	0.676959	1	0
Ip259	18.8591	4.23496	0.811361	23.2438	0	3.52292	0.674944	0	0	3.31068	0.63428	0	0	6.85613	1.31354	0	0	5.21958	1	0
iPLA2-VIA	0	0.214977	0.87572	0	0	0.197696	0.805323	0	0	0.216591	0.882294	0	0	0.286018	1.16511	0	16.3048	0.245486	1	16.3048
Irp-1B	9.48849	0.26492	0.847337	11.198	0	0.509782	1.63052	0	0	0.437653	1.39982	0	7.7556	0.323149	1.03358	7.50363	7.88695	0.31265	1	7.88695
IRSp53	0	0.0606635	1.04845	0	0	0.199892	3.45474	0	15.5259	0.0001	0.0017283	8983.3	0	0.0165237	0.285579	0	7.53834	0.0578602	1	7.53834
Iswi	0	0.457849	1.08919	0	0	0.478795	1.13901	0	0	0.477525	1.13599	0	0	0.431091	1.02553	0	17.8288	0.420359	1	17.8288
Jarid2	0	1.4147	0.988926	0	0	0.97159	0.679174	0	7.49984	0.690116	0.482414	15.5465	0	1.34346	0.939121	0	8.06561	1.43055	1	8.06561
jbug	0	0.0136957	1.44445	0	0	0.101483	10.7031	0	9.19002	0.0001	0.0105467	871.364	7.7604	0.0001	0.0105467	735.813	0	0.00948163	1	0
jdp	0	86.4237	3.45734	0	15.8459	2.71557	0.108635	145.864	0	133.253	5.33072	0	0	5.36568	0.214652	0	18.8299	24.9972	1	18.8299
Kap-alpha1	0	0.249113	0.887086	0	0	0.383463	1.3655	0	0	0.888329	3.16332	0	15.9864	0.300062	1.06852	14.9613	0	0.280822	1	0
Kap-alpha3	9.19434	1.30235	1.11357	8.25661	8.40116	1.1448	0.978865	8.58255	8.16237	0.374645	0.320341	25.4803	0	1.14343	0.977692	0	8.61047	1.16952	1	8.61047
Karybeta3	16.5435	0.403286	0.898893	18.4043	0	0.5482	1.2219	0	0	0.267427	0.596074	0	0	0.391902	0.873519	0	0	0.448647	1	0
kcc	0	1.41538	0.592091	0	0	2.56244	1.07194	0	0	4.66023	1.9495	0	0	3.11901	1.30477	0	16.1246	2.39047	1	16.1246
Khc	15.5058	0.72555	1.07506	14.4232	15.7002	0.614494	0.910502	17.2435	0	0.436362	0.646562	0	16.2351	0.584573	0.866167	18.7436	8.18068	0.674896	1	8.18068
kis	0	3.42405	1.19486	0	0	4.2011	1.46602	0	0	3.11473	1.08692	0	0	2.27746	0.794744	0	24.7227	2.86565	1	24.7227
Klc	0	1.22788	1.08247	0	0	1.029	0.907142	0	0	1.71945	1.51582	0	0	1.1183	0.985869	0	16.1536	1.13433	1	16.1536
KrT95D	0	2.0557	0.864217	0	0	2.13887	0.899181	0	0	0.71604	0.301023	0	0	2.36297	0.993391	0	25.1969	2.37869	1	25.1969
Ktl	0	2.20234	1.05072	0	0	2.43182	1.1602	0	7.42112	0.176835	0.0843666	87.9627	0	2.4471	1.16749	0	16.8372	2.09603	1	16.8372
l(1)10Bb	0	0.529664	0.890717	0	7.62916	0.553774	0.931261	8.19229	23.9786	0.559928	0.941611	25.4655	8.05963	0.652601	1.09746	7.34392	0	0.594649	1	0
l(1)G0020	16.3833	0.0302385	1.30827	12.5228	0	0.0316164	1.36789	0	0	0.0001	0.00432652	0	0	0.0131745	0.569997	0	0	0.0231133	1	0
l(1)G0196	0	1.08187	0.792758	0	0	1.21379	0.889423	0	0	1.36668	1.00146	0	0	1.81578	1.33054	0	16.1315	1.36469	1	16.1315
l(1)G0320	0	2.22803	1.1358	0	0	1.83198	0.933903	0	7.66153	3.28048	1.67232	4.58139	16.1098	1.87392	0.955284	16.8638	0	1.96164	1	0
l(2)efl	0	0.254806	3.08835	0	0	0.0210282	0.25487	0	0	0.229647	2.78341	0	0	0.0328913	0.398654	0	8.09126	0.0825058	1	8.09126
l(2)k09913	0	2.37038	0.966512	0	7.58305	3.88935	1.58586	4.78165	15.6495	1.78503	0.727839	21.5014	7.71685	2.4969	1.0181	7.57964	7.58234	2.45251	1	7.58234
l(3)mbn	0	1e-06	0.00365854	0	16.1817	0.0001	0.365854	44.2298	24.994	0.0001	0.365854	68.317	16.4575	0.0001	0.365854	44.9838	0	0.000273333	1	0
L2HGDH	16.3725	0.257815	0.832499	19.6667	0	0.343759	1.11002	0	7.13606	0.422951	1.36573	5.22508	0	0.332227	1.07278	0	7.6016	0.309688	1	7.6016
Lam	0	0.898777	1.29875	0	0	0.568105	0.820926	0	0	0.430562	0.622173	0	0	0.637633	0.921394	0	0.793415	0.69203	1	0.793415
LanB1	0	1e-06	9.55632e-06	0	8.40229	0.0001	0.000955632	8792.4	0	0.0001	0.000955632	0	0	0.00790001	0.0754951	0	16.2553	0.104643	1	16.2553
LanB2	0	0.0116456	0.45806	0	8.83091	0.0001	0.00393333	2245.15	0	0.0001	0.00393333	0	0	0.00715853	0.281569	0	0	0.0254237	1	0
lap	0	1.83027	0.967951	0	0	2.71235	1.43444	0	0	2.41114	1.27515	0	0	2.07175	1.09566	0	18.5536	1.89087	1	18.5536
lark	16.4566	2.42604	1.3875	11.8606	7.96628	1.27352	0.728352	10.9374	8.27739	2.49439	1.42659	5.80221	8.67764	1.4909	0.852675	10.177	15.3839	1.7485	1	15.3839
Lcp65Ac	0	1e-06	1	0	0	0.0001	100	0	15.5209	0.0001	100	0.155209	0	0.0001	100	0	0	1e-06	1	0
levy	9.00345	8.55421	0.670839	13.4212	0	13.8234	1.08406	0	0	13.1835	1.03388	0	0	16.5792	1.30018	0	0	12.7515	1	0
lig	0	0.533728	1.43016	0	0	0.350664	0.939629	0	0	1.72632	4.6258	0	0	0.238613	0.639379	0	18.7487	0.373194	1	18.7487
Liprin-alpha	0	0.618334	1.53151	0	0	0.473034	1.17162	0	0	0.123183	0.305103	0	0	0.317495	0.78638	0	25.6573	0.403743	1	25.6573
LManV	16.3298	1e-06	1	16.3298	0	0.0001	100	0	0	0.0001	100	0	0	0.0001	100	0	0	1e-06	1	0
lola	0	9.80038	1.02293	0	0	7.74359	0.808248	0	0	8.91806	0.930834	0	0	10.8188	1.12923	0	16.3831	9.58071	1	16.3831
lolal	0	4.22172	1.21258	0	0	3.61347	1.03787	0	0	3.20346	0.920108	0	0	3.07464	0.883109	0	23.7563	3.48161	1	23.7563
Lon	0	0.232499	0.856317	0	15.6357	0.547964	2.0182	7.74736	0	0.0001	0.000368309	0	8.18881	0.302301	1.1134	7.35475	7.79825	0.271511	1	7.79825
lost	1.59022	1.57164	0.700497	2.27013	0	2.08185	0.927904	0	0	1.60877	0.71705	0	0	2.49038	1.10999	0	0	2.2436	1	0
Lpin	0	0.618662	0.882184	0	16.9095	0.878187	1.25225	13.5032	0	0.251801	0.359056	0	8.55614	0.60605	0.864199	9.90067	9.52785	0.701285	1	9.52785
Lsd-1	0	0.0174365	0.743894	0	8.02274	0.0001	0.0042663	1880.49	0	0.0001	0.0042663	0	0	0.00209197	0.0892498	0	16.151	0.0234395	1	16.151
Lsp1alpha	18.6125	1e-06	1	18.6125	0	0.0001	100	0	0	0.0001	100	0	0	0.0001	100	0	0	1e-06	1	0
Lsp1beta	17.6764	1e-06	1	17.6764	0	0.0001	100	0	0	0.0001	100	0	0	0.0001	100	0	0	1e-06	1	0
Lsp1gamma	21.5503	1e-06	1	21.5503	0	0.0001	100	0	0	0.0001	100	0	0	0.0001	100	0	0	1e-06	1	0
Lsp2	9.69479	1e-06	1	9.69479	0	0.0001	100	0	0	0.0001	100	0	0	0.0001	100	0	0	1e-06	1	0
LysRS	17.4526	1.03801	2.61462	6.67499	16.4195	0.302684	0.762425	21.5359	0	0.450662	1.13517	0	0	0.242902	0.611841	0	15.685	0.397001	1	15.685
MagR	0	1.08987	0.557805	0	0	2.79482	1.43041	0	0	1.39178	0.712324	0	7.98629	2.62017	1.34103	5.95535	0	1.95385	1	0
Map205	0	0.366928	0.984949	0	0	0.355519	0.954323	0	0	0.151206	0.405883	0	0	0.283568	0.761185	0	23.4727	0.372535	1	23.4727
Map60	0	0.44777	1.27613	0	0	0.278896	0.794843	0	0	0.431311	1.22922	0	0	0.269886	0.769164	0	24.2832	0.350882	1	24.2832
Marf	0	1.24866	0.663061	0	0	2.15356	1.14358	0	0	1.54949	0.822808	0	0	2.28583	1.21382	0	7.68641	1.88317	1	7.68641
mbo	0	0.100098	1.16183	0	0	0.0689498	0.800299	0	0	0.0001	0.0011607	0	0	0.090955	1.05571	0	25.266	0.0861551	1	25.266
Mcr	0	0.0492688	0.879092	0	7.45623	0.0604268	1.07818	6.91556	0	0.0883119	1.57573	0	0	0.0667157	1.19039	0	0	0.0560451	1	0
MCTS1	0	0.712373	1.09035	0	24.0055	0.457933	0.700904	34.2493	15.956	0.113921	0.174366	91.5086	7.88278	0.652358	0.998489	7.89471	0	0.653345	1	0
Mdh1	24.3174	1.26097	0.593996	40.9386	15.844	1.91746	0.903242	17.5412	0	1.9437	0.915602	0	0	1.91948	0.904194	0	7.79292	2.12287	1	7.79292
Mdh2	0	3.90705	0.853264	0	7.83867	5.90541	1.28969	6.07796	0	6.04031	1.31915	0	0	5.49585	1.20024	0	0	4.57895	1	0
me31B	9.70836	1.66926	1.37436	7.06391	15.3753	0.764228	0.629216	24.4356	0	1.28798	1.06044	0	0	1.25683	1.03479	0	16.613	1.21457	1	16.613
MED19	0	1.074	1.07994	0	15.9494	0.615904	0.619309	25.7536	0	0.763841	0.768063	0	0	1.10981	1.11595	0	0	0.994502	1	0
mEFTs	16.2575	0.569872	0.689578	23.576	0	1.11287	1.34663	0	0	0.937997	1.13503	0	0	1.05834	1.28065	0	0	0.826407	1	0
mEFTu1	0	0.47984	0.731761	0	0.471984	1.10399	1.6836	0.280342	0	0.65803	1.0035	0	0	0.796463	1.21461	0	0	0.655733	1	0
mEFTu2	16.7302	0.133487	1.09908	15.2219	16.2507	0.195713	1.61143	10.0847	0	0.171512	1.41216	0	16.017	0.111819	0.920673	17.397	0	0.121453	1	0
metro	0	1.96768	2.13715	0	0	0.756953	0.822147	0	0	0.176835	0.192065	0	0	0.662705	0.719781	0	24.7369	0.920704	1	24.7369
MetRS	15.9974	0.162781	1.00913	15.8526	0	0.21246	1.31711	0	0	0.114824	0.71183	0	0	0.169646	1.05169	0	0	0.161308	1	0
mfas	0	0.223034	0.360121	0	0	0.0745255	0.120332	0	1.56302	0.0001	0.000161465	9680.27	0	0.0941977	0.152096	0	16.0788	0.61933	1	16.0788
Mfe2	0	0.183068	1.48601	0	0	0.106151	0.861658	0	0	0.0001	0.000811726	0	23.3205	0.0956229	0.776196	30.0446	0	0.123194	1	0
mge	23.8106	2.1629	0.985357	24.1645	0	2.08881	0.951605	0	0	2.97118	1.35359	0	0	2.61755	1.19248	0	0	2.19504	1	0
Mhc	0	1e-06	1	0	0	0.0001	100	0	1.80584	0.0001	100	0.0180584	0	0.0001	100	0	0	1e-06	1	0
Mi-2	17.7396	0.980995	1.48433	11.9512	0	0.739454	1.11886	0	14.9051	0.529775	0.801596	18.5942	0	0.434104	0.656839	0	0	0.6609	1	0
mIF2	16.8348	0.118221	1.40049	12.0207	0	0.0871334	1.03221	0	0	0.0001	0.00118464	0	0	0.0899884	1.06604	0	0	0.084414	1	0
milt	0	1.05644	0.95452	0	0	0.910913	0.823034	0	0	0.631433	0.570516	0	0	1.27917	1.15576	0	25.0253	1.10677	1	25.0253
mim	0	0.656093	1.47998	0	0	0.654434	1.47624	0	0	0.834471	1.88236	0	0	0.430916	0.972038	0	24.0668	0.443312	1	24.0668
mip120	0	0.143547	1.02725	0	0	0.0630323	0.451072	0	0	0.0001	0.000715621	0	0	0.151608	1.08494	0	17.011	0.139739	1	17.011
miple2	0	0.216894	1.05411	0	0	0.214499	1.04247	0	0	0.113921	0.55366	0	16.1697	0.175693	0.853874	18.9369	0	0.20576	1	0
Mitofilin	8.38129	0.565176	0.771651	10.8615	0	0.770562	1.05207	0	0	1.31513	1.79558	0	0	0.873467	1.19257	0	0	0.732424	1	0
Mlc1	10.0953	0.0216387	4.05721	2.48825	0	0.0001	0.0187498	0	16.8712	0.0001	0.0187498	899.805	8.40842	0.0001	0.0187498	448.454	8.74438	0.00533339	1	8.74438
Mlc2	16.8202	1e-06	0.000155813	107952	0	0.0451924	7.04155	0	0	0.0001	0.0155813	0	0	0.00602489	0.938756	0	0	0.00641796	1	0
Mlp60A	9.5595	1e-06	0.000852189	11217.6	0.413795	0.0001	0.0852189	4.85567	0	0.0001	0.0852189	0	0	0.00312882	2.66634	0	0	0.00117345	1	0
Mlp84B	9.31027	0.0872694	1.05579	8.81832	0	0.177964	2.15301	0	0	0.0001	0.0012098	0	0	0.0663795	0.803061	0	0	0.0826581	1	0
mmd	0	6.99008	1.36548	0	0	4.70571	0.919237	0	0	3.96106	0.773774	0	0	5.31846	1.03894	0	18.26	5.11915	1	18.26
Mmp1	17.8809	0.0389168	0.531775	33.625	16.5029	0.00904445	0.123587	133.532	16.3154	0.0001	0.00136644	11940.1	8.3374	0.0358738	0.490194	17.0084	0	0.0731828	1	0
mod	8.76023	0.391422	0.715906	12.2366	0.204656	0.438824	0.802605	0.25499	0	0.646525	1.18249	0	0	0.621557	1.13682	0	0	0.54675	1	0
mor	0	0.316841	1.4903	0	16.4828	0.131351	0.617826	26.6788	0	0.227842	1.07168	0	8.38258	0.161452	0.759411	11.0383	17.0983	0.212602	1	17.0983
Mp20	8.13688	1e-06	1	8.13688	0	0.0001	100	0	0	0.0001	100	0	0	0.0001	100	0	0	1e-06	1	0
Mpcp1	9.55921	0.00719732	0.502919	19.0075	7.52635	0.0001	0.00698759	1077.1	0	0.0001	0.00698759	0	0	0.0185767	1.29806	0	16.173	0.0143111	1	16.173
Mpcp2	0	6.16645	0.732421	0	15.9608	10.4415	1.24019	12.8696	7.77198	9.92454	1.17879	6.59319	8.04184	10.0677	1.1958	6.72509	8.20327	8.41927	1	8.20327
mRpL1	0	0.485362	0.721549	0	0	0.850174	1.26388	0	0	0.693268	1.03063	0	0	0.788333	1.17195	0	8.12437	0.672668	1	8.12437
mRpL16	9.33139	0.580322	0.908924	10.2664	0	0.983558	1.54049	0	0	0.592632	0.928205	0	0	0.662168	1.03712	0	0	0.638471	1	0
mRpL2	17.6134	0.632001	0.958653	18.3731	0	0.840703	1.27522	0	7.23519	0.820297	1.24427	5.81481	0	0.722753	1.09631	0	0	0.65926	1	0
mRpL40	0	0.410298	0.698041	0	0	0.564372	0.960167	0	8.22082	0.41637	0.708371	11.6053	15.8429	0.735565	1.25142	12.66	0	0.587785	1	0
mRpL46	10.0041	0.261187	0.672203	14.8826	0	0.473478	1.21856	0	0	0.596243	1.53452	0	7.84541	0.495741	1.27586	6.14912	0	0.388554	1	0
mRpL48	18.0325	0.640461	0.82834	21.7695	0	1.05439	1.36369	0	0	0.489697	0.633349	0	7.99711	0.932543	1.2061	6.63054	0	0.773187	1	0
mRpL53	0	1e-06	1	0	0	0.0001	100	0	7.42043	0.0001	100	0.0742043	8.07674	0.0001	100	0.0807674	0	1e-06	1	0
mRpL55	17.3462	1.47152	0.719998	24.0921	0	1.74054	0.851624	0	0	1.50297	0.735384	0	0	2.90295	1.42038	0	0	2.04379	1	0
mRpS11	0	0.899496	1.26187	0	0	0.831525	1.16652	0	0	0.758201	1.06365	0	7.73528	0.740249	1.03847	7.44874	0	0.712828	1	0
mRpS21	16.7312	0.597523	0.552224	30.2978	0	1.16625	1.07783	0	0	0.603823	0.558046	0	0	1.36481	1.26134	0	0	1.08203	1	0
mRpS7	16.8632	0.730869	0.866143	19.4693	0	1.49222	1.76841	0	0	0.783002	0.927925	0	0	0.947311	1.12265	0	0	0.84382	1	0
Msp300	0	11.1189	0.929147	0	0	20.9268	1.74874	0	7.97029	10.2263	0.854563	9.32675	0	9.3037	0.777462	0	0	11.9668	1	0
mt:CoII	1.02501	37.8868	0.819143	1.25132	0	54.1103	1.16991	0	0	43.2221	0.934496	0	0	44.9248	0.971309	0	0	46.2518	1	0
mtd	0	8.88734	1.44733	0	0	5.46772	0.890436	0	0	3.16717	0.515783	0	0	5.62064	0.91534	0	19.3185	6.14049	1	19.3185
Mtpalpha	9.57935	0.103511	1.24607	7.68766	15.8979	0.0436341	0.525268	30.2662	0	0.159185	1.91627	0	8.07859	0.0244288	0.294074	27.4713	0	0.0830702	1	0
Mtr4	0	0.128682	1.22491	0	0	0.0582956	0.55491	0	0	0.0001	0.000951889	0	0	0.106595	1.01467	0	18.0737	0.105054	1	18.0737
mts	8.75203	6.92159	1.17991	7.41756	7.8058	6.22672	1.06145	7.35388	16.3934	7.51588	1.28121	12.7952	8.22485	5.4746	0.933241	8.81321	16.4469	5.86622	1	16.4469
mub	0	36.1329	2.87482	0	0	10.4376	0.830439	0	16.1023	25.7395	2.0479	7.86286	8.09613	6.92793	0.551202	14.6881	0	12.5688	1	0
mys	0	0.447604	1.20766	0	0	0.175536	0.473606	0	16.1464	0.413939	1.11683	14.4573	0	0.227012	0.61249	0	0	0.370637	1	0
Nab2	0	0.442685	1.13771	0	23.3985	0.264844	0.680651	34.3766	7.83071	0.388598	0.9987	7.8409	8.30548	0.446389	1.14723	7.23962	7.94637	0.389103	1	7.94637
Nap1	10.1241	1.94611	0.917523	11.0341	0	2.75203	1.29749	0	15.7601	2.08936	0.985063	15.9991	0	1.9208	0.905593	0	16.0833	2.12105	1	16.0833
ND-18	8.92778	2.02941	0.699608	12.7611	0	4.28274	1.47641	0	0	2.80764	0.967889	0	0	3.65546	1.26016	0	7.97128	2.90078	1	7.97128
ND-20	8.33104	2.35019	0.621856	13.3971	0	4.86481	1.28722	0	0	4.13395	1.09383	0	0	4.75066	1.25702	0	0	3.77931	1	0
ND-23	8.07584	2.81303	0.64434	12.5335	0	6.12813	1.40368	0	15.2537	6.00196	1.37478	11.0954	0	5.74893	1.31682	0	0	4.36576	1	0
ND-24	8.28362	1.25409	0.594817	13.9263	0	2.92682	1.3882	0	0	1.3559	0.643108	0	0	2.78129	1.31917	0	0	2.10836	1	0
ND-30	9.47645	2.17727	0.758293	12.4971	0	3.72649	1.29785	0	0	2.58596	0.900632	0	0	3.57212	1.24409	0	8.50915	2.87128	1	8.50915
ND-39	0	2.92945	0.745241	0	16.5864	5.06996	1.28977	12.8599	0	3.73697	0.950669	0	0	4.813	1.22441	0	16.4501	3.93089	1	16.4501
ND-42	11.0472	1.446	0.73673	14.995	0	3.22614	1.6437	0	0	2.37174	1.20839	0	0	2.31043	1.17715	0	0	1.96273	1	0
ND-49	9.79196	2.32773	0.728048	13.4496	8.14586	4.52082	1.41399	5.76092	0	3.09171	0.966999	0	0	3.83148	1.19838	0	8.22891	3.19722	1	8.22891
ND-51	8.83392	3.02363	0.69246	12.7573	16.303	5.67256	1.29911	12.5494	0	3.99037	0.913859	0	0	5.49473	1.25838	0	16.1036	4.36651	1	16.1036
ND-75	0	1.15052	0.706264	0	8.25818	2.72131	1.67053	4.94346	0	3.19111	1.95892	0	0	1.88002	1.15408	0	16.0306	1.62902	1	16.0306
ND-B14.5B	7.82391	2.19803	0.557163	14.0424	7.96607	4.57603	1.15995	6.86762	0	2.38558	0.604704	0	16.1475	5.10473	1.29396	12.4791	0	3.94503	1	0
ND-B16.6	16.9547	3.77838	0.890212	19.0457	0	3.99479	0.9412	0	0	3.54554	0.835352	0	0	4.94965	1.16617	0	0	4.24436	1	0
ND-B17.2	8.33009	2.83792	0.644788	12.9191	0	4.88923	1.11086	0	0	3.67206	0.834309	0	0	5.73745	1.30357	0	7.91567	4.40132	1	7.91567
ND-B22	0	5.06793	0.809311	0	15.986	4.94609	0.789854	20.2392	0	7.05772	1.12706	0	15.6099	8.14357	1.30047	12.0033	0	6.26203	1	0
ND-PDSW	7.65919	3.24677	0.748779	10.2289	0	6.03638	1.39212	0	0	4.99322	1.15155	0	0	5.09859	1.17585	0	7.60592	4.33609	1	7.60592
ND-SGDH	0	3.21553	0.739928	0	7.67723	5.77703	1.32936	5.77514	0	6.96769	1.60334	0	0	4.99302	1.14895	0	0	4.34573	1	0
nec	0	0.027702	0.395245	0	15.6246	0.125266	1.78726	8.74221	0	0.0001	0.00142677	0	0	0.0064779	0.0924249	0	0	0.0700883	1	0
Nelf-A	0	0.36763	1.21442	0	0	0.242015	0.799466	0	0	0.151206	0.49949	0	0	0.281075	0.928499	0	24.2281	0.30272	1	24.2281
neur	0	0.181112	2.5105	0	0	0.134485	1.86417	0	0	0.0001	0.00138616	0	0	0.0294379	0.408057	0	15.4326	0.0721417	1	15.4326
NHP2	0	0.186863	0.965139	0	0	0.25709	1.32786	0	8.28105	0.325416	1.68076	4.92697	0	0.212318	1.09661	0	0	0.193613	1	0
ninaC	9.26314	1e-06	1.30391e-05	710411	0	0.0001	0.00130391	0	0	0.0001	0.00130391	0	0	0.0203677	0.265577	0	0	0.0766922	1	0
ninaE	0	0.494525	0.265321	0	0	0.0943696	0.0506309	0	0	0.0001	5.36517e-05	0	0	0.1263	0.0677622	0	9.02588	1.86387	1	9.02588
Nipsnap	0	1.23996	0.686284	0	15.7663	2.29219	1.26867	12.4274	7.81427	1.55498	0.860641	9.0796	24.499	2.20438	1.22007	20.0801	0	1.80677	1	0
nito	0	0.259961	1.86023	0	16.1856	0.111339	0.796717	20.3154	0	0.227842	1.63039	0	0	0.0903208	0.646316	0	0	0.139747	1	0
Nlp	8.56826	1.01873	1.04173	8.22503	0	1.08642	1.11095	0	0	1.60305	1.63923	0	0	0.84488	0.863951	0	0	0.977926	1	0
Nmt	0	0.0676025	0.702601	0	0	0.167969	1.74572	0	0	0.0883119	0.917836	0	0	0.073116	0.759903	0	1.44457	0.0962175	1	1.44457
nocte	0	2.3457	0.98035	0	0	3.47661	1.453	0	0	1.66773	0.697003	0	0	2.3976	1.00204	0	24.848	2.39271	1	24.848
Non1	15.8177	2.51483	0.893859	17.6959	0	2.37234	0.843212	0	0	2.21561	0.787505	0	0	3.13161	1.11308	0	0	2.81346	1	0
nonA	0	2.03553	1.05546	0	15.5627	2.3017	1.19347	13.0398	9.46319	1.10661	0.573798	16.4922	8.12918	1.96354	1.01813	7.98441	0	1.92857	1	0
nop5	10.065	0.0799182	0.573605	17.5468	0	0.0545616	0.391611	0	0	0.0001	0.00071774	0	0	0.170646	1.2248	0	0	0.139326	1	0
Nop56	9.87414	0.351321	1.14447	8.62767	0	0.394134	1.28394	0	0	0.203136	0.66174	0	0	0.303718	0.989399	0	0	0.306972	1	0
Nph	16.3102	0.504983	0.971475	16.7892	0	0.362065	0.696534	0	0	0.227609	0.43787	0	0	0.475561	0.914875	0	0	0.51981	1	0
Nrg	0	2.52324	1.10023	0	8.90817	2.28008	0.994202	8.96012	0	1.87775	0.81877	0	0	2.49923	1.08976	0	8.30877	2.29337	1	8.30877
nrv1	0	0.00789308	0.0681006	0	15.9849	0.510109	4.40117	3.63197	0	0.0001	0.000862789	0	8.29007	0.00958579	0.0827051	100.236	15.7416	0.115903	1	15.7416
nrv2	8.13055	1.18222	0.567431	14.3287	0	0.396224	0.190176	0	0	0.113921	0.054679	0	0	0.77032	0.369732	0	0	2.08346	1	0
nrv3	8.48729	35.2534	0.704752	12.043	0	68.291	1.36521	0	0	44.76	0.894797	0	0	64.9481	1.29838	0	1.44739	50.0225	1	1.44739
Ns1	3.88197	0.175442	1.09244	3.55348	0	0.0848355	0.528254	0	0	0.0883119	0.549901	0	0	0.16535	1.0296	0	0	0.160596	1	0
Ns3	0	0.179853	1.41956	0	0	0.137909	1.0885	0	0	0.274009	2.16272	0	15.5277	0.103734	0.818759	18.9649	0	0.126696	1	0
nsl1	0	0.931282	1.20233	0	0	0.906049	1.16976	0	0	0.33602	0.433819	0	0	0.713072	0.920613	0	15.742	0.774562	1	15.742
nSyb	0	21.9066	1.0268	0	0	27.9226	1.30878	0	0	16.3058	0.76428	0	0	23.3098	1.09256	0	16.9203	21.3349	1	16.9203
nudC	0	0.212125	1.4598	0	0	0.136356	0.938378	0	0	0.239518	1.64832	0	0	0.13242	0.911286	0	16.9708	0.145311	1	16.9708
Nup107	0	0.085357	0.756809	0	0	0.1391	1.23332	0	0	0.19	1.68462	0	0	0.116954	1.03696	0	24.5112	0.112785	1	24.5112
Nup153	0	0.862866	1.1112	0	0	0.919988	1.18477	0	0	1.54259	1.98655	0	0	0.811664	1.04527	0	26.0995	0.776515	1	26.0995
Nup214	15.9434	0.0401629	0.675433	23.6047	0	0.0447768	0.753026	0	0	0.0001	0.00168173	0	0	0.0495165	0.832736	0	19.3573	0.0594625	1	19.3573
Nup358	0	0.226422	1.26022	0	15.4435	0.314384	1.7498	8.82585	0	0.30864	1.71783	0	0	0.131267	0.730605	0	19.9992	0.179668	1	19.9992
Nup50	0	0.190007	1.23712	0	0	0.415481	2.70515	0	0	0.151206	0.984485	0	8.15795	0.120291	0.783199	10.4162	3.41159	0.153589	1	3.41159
Nup54	0	0.124217	1.19267	0	0	0.0508252	0.487998	0	0	0.0751767	0.721808	0	0	0.0971439	0.932726	0	25.8344	0.10415	1	25.8344
Nup58	0	0.147902	0.851711	0	0	0.145299	0.836723	0	0	0.0001	0.000575863	0	0	0.196124	1.1294	0	25.646	0.173652	1	25.646
Nup62	0	0.348339	1.11054	0	0	0.295462	0.94196	0	0	0.441962	1.40901	0	0	0.291711	0.93	0	26.4799	0.313668	1	26.4799
Nup98-96	0	0.149571	1.15964	0	0	0.109318	0.847554	0	0	0.243446	1.88747	0	0	0.135979	1.05426	0	27.1361	0.12898	1	27.1361
Nurf-38	0	1.11537	0.893546	0	8.9381	1.27284	1.0197	8.76541	0	1.15972	0.929073	0	0	1.44632	1.15868	0	0	1.24825	1	0
nwk	0	0.933121	0.652345	0	0	1.70282	1.19045	0	0	0.569765	0.398323	0	0	1.8647	1.30361	0	27.2817	1.43041	1	27.2817
Obp99b	0	1e-06	1	0	0	0.0001	100	0	15.7587	0.0001	100	0.157587	0	0.0001	100	0	0	1e-06	1	0
Obp99c	0	0.185923	1.23305	0	8.08945	0.0403894	0.267863	30.2	0	0.0001	0.000663202	0	0	0.0001	0.000663202	0	0	0.150784	1	0
Opa1	0	1.53165	0.87232	0	7.69215	2.31545	1.31872	5.83304	0	2.55974	1.45785	0	7.6442	1.93986	1.10481	6.91903	0	1.75583	1	0
orb2	0	3.07913	0.825211	0	0	5.0067	1.3418	0	0	2.02357	0.542319	0	0	3.89306	1.04334	0	25.3292	3.73132	1	25.3292
Ost48	0	0.857502	1.30178	0	7.59274	0.669546	1.01644	7.46991	0	1.04064	1.5798	0	0	0.511526	0.776551	0	0	0.658715	1	0
ox	17.7304	3.31316	0.701566	25.2726	0	4.35582	0.92235	0	0	3.73484	0.790856	0	8.78175	6.1035	1.29242	6.79479	17.0477	4.72253	1	17.0477
p120ctn	0	6.242	1.31143	0	0	5.02712	1.05618	0	0	4.56476	0.959044	0	0	4.70734	0.989	0	26.0199	4.7597	1	26.0199
P32	16.0718	0.737382	0.923378	17.4054	0	1.01366	1.26935	0	0	1.01191	1.26715	0	0	0.93003	1.16462	0	0	0.79857	1	0
pAbp	9.48696	12.1926	1.15581	8.20803	0	10.7748	1.02141	0	0	9.45354	0.896159	0	0	8.50783	0.806509	0	0.241837	10.549	1	0.241837
Pabp2	0	0.956817	1.78491	0	15.7501	0.607632	1.13352	13.8949	15.7236	1.10968	2.07007	7.59567	15.907	0.301825	0.563044	28.2517	0	0.536058	1	0
PAPLA1	0	0.203181	1.05519	0	0	0.117639	0.61094	0	0	0.0001	0.000519334	0	0	0.162266	0.842703	0	15.9861	0.192554	1	15.9861
par-1	0	2.56067	1.25886	0	16.4276	2.40829	1.18394	13.8753	7.75336	2.00928	0.987785	7.84924	0	1.40295	0.689707	0	17.8391	2.03413	1	17.8391
parvin	0	0.250048	0.871974	0	0	0.256559	0.894679	0	15.941	0.5322	1.8559	8.58937	15.6849	0.224589	0.783191	20.027	0	0.286761	1	0
Past1	9.11165	0.729366	1.34028	6.79833	0	0.687171	1.26274	0	8.20003	0.360784	0.662975	12.3685	8.14439	0.357643	0.657202	12.3925	16.5241	0.54419	1	16.5241
Patj	0	0.112086	0.990984	0	0	0.182774	1.61596	0	0	0.243213	2.15032	0	0	0.0882844	0.780549	0	15.8037	0.113106	1	15.8037
Pax	8.53543	0.326888	0.919817	9.27948	16.1094	0.834835	2.34911	6.85764	1.55179	0.433574	1.22002	1.27194	8.16897	0.266042	0.748606	10.9122	0	0.355383	1	0
Pc	0	0.42483	0.775783	0	0	0.676478	1.23532	0	0	0.176835	0.322918	0	0	0.693964	1.26725	0	15.9031	0.547614	1	15.9031
Pcd	0	2.55164	1.39312	0	0	0.901327	0.4921	0	7.73396	3.69393	2.01679	3.8348	0	1.02936	0.562004	0	0	1.83159	1	0
Pdcd4	0	5.43842	0.916174	0	7.77561	6.74987	1.13711	6.83808	7.82028	5.96058	1.00414	7.78804	0	5.58118	0.940224	0	7.41253	5.93601	1	7.41253
Pde1c	0	4.0162	1.26443	0	0	3.59694	1.13243	0	0	0.400257	0.126013	0	0	3.76466	1.18523	0	16.4739	3.1763	1	16.4739
Pde6	0	3.0845	0.725755	0	0	6.1386	1.44435	0	0	24.302	5.71805	0	0	4.94514	1.16354	0	15.7319	4.25006	1	15.7319
Pdk	0	0.639151	0.46083	0	15.4123	0.722296	0.520777	29.5948	0	1.69534	1.22234	0	0	0.919425	0.662908	0	0	1.38696	1	0
Pen	15.9571	1e-06	0.000366254	43568.4	0	0.0001	0.0366254	0	0	0.0001	0.0366254	0	0	0.0001	0.0366254	0	0	0.00273035	1	0
Peritrophin-A	0	1e-06	0.000923662	0	0	0.00849019	7.84206	0	0	0.0001	0.0923662	0	7.97465	0.0001	0.0923662	86.3373	0	0.00108265	1	0
Pfk	9.3656	0.595029	0.515122	18.1813	0	1.39354	1.2064	0	0	1.50054	1.29903	0	0	1.31086	1.13482	0	8.02254	1.15512	1	8.02254
Pgam5	0	0.164309	1.16252	0	0	0.182844	1.29366	0	0	0.239518	1.69464	0	0	0.123757	0.875604	0	17.655	0.141339	1	17.655
Pgd	9.32545	1e-06	2.43276e-05	383328	0	0.0255018	0.620398	0	0	0.0001	0.00243276	0	0	0.00646469	0.15727	0	0	0.0411056	1	0
Phb2	10.6506	0.929201	0.860754	12.3736	8.46726	1.51976	1.40782	6.01447	0	1.48112	1.37201	0	0	1.27332	1.17952	0	0	1.07952	1	0
ph-d	0	0.282655	1.34382	0	0	0.209441	0.995742	0	0	0.0001	0.000475427	0	0	0.178172	0.847081	0	15.9259	0.210337	1	15.9259
Pi4KIIalpha	0	0.193939	0.802582	0	15.9951	0.315765	1.30674	12.2405	0	0.179115	0.741237	0	0	0.246859	1.02158	0	0	0.241644	1	0
PIP4K	0	6.99508	1.18836	0	16.0623	6.01668	1.02215	15.7143	0	4.25643	0.723106	0	24.0468	7.16651	1.21749	19.7511	16.05	5.88631	1	16.05
Pka-C1	0	40.3819	2.82809	0	7.8621	5.32213	0.372728	21.0934	7.89846	11.1773	0.782786	10.0902	8.04502	7.83138	0.548461	14.6684	0.681833	14.2788	1	0.681833
Pka-R1	0	7.72331	2.13771	0	16.1331	1.47881	0.409316	39.4148	0	1.35691	0.375574	0	16.1055	1.68097	0.465272	34.6153	0	3.61289	1	0
Pka-R2	0	18.8604	3.38696	0	0	2.05632	0.369275	0	0	8.17211	1.46755	0	0	2.07974	0.373481	0	16.752	5.56853	1	16.752
Pkc53E	0	25.2294	2.30557	0	8.02647	3.7148	0.339474	23.6438	0	2.65783	0.242883	0	0	7.70628	0.704232	0	0	10.9428	1	0
Pkc98E	0	5.6264	1.50709	0	0	5.78982	1.55086	0	0	5.1425	1.37747	0	0	2.93107	0.785119	0	26.15	3.73329	1	26.15
Plc21C	0	3.91056	1.72726	0	16.8611	2.08065	0.919007	18.3471	0	1.01734	0.44935	0	16.5513	1.59648	0.705154	23.4719	16.8366	2.26402	1	16.8366
Pmm2	0	0.223812	0.989835	0	0	0.14823	0.655567	0	0	0.151206	0.668726	0	15.4689	0.19035	0.841844	18.375	0	0.22611	1	0
pnut	0	0.626217	0.879141	0	0	0.756114	1.0615	0	0	1.04405	1.46573	0	0	0.651458	0.914576	0	1.4123	0.712306	1	1.4123
polybromo	0	0.127189	1.73802	0	0	0.052369	0.715617	0	0	0.0001	0.00136649	0	8.53944	0.0603844	0.825147	10.349	15.8531	0.0731802	1	15.8531
pont	0	0.204069	1.0536	0	0	0.128431	0.663087	0	0	0.0001	0.000516298	0	0	0.167494	0.86477	0	17.7077	0.193686	1	17.7077
porin	0	10.7101	0.971981	0	0	14.8848	1.35085	0	0.428332	17.259	1.56632	0.273465	0	12.2082	1.10794	0	0	11.0189	1	0
Porin2	0	1e-06	1	0	0	0.0001	100	0	8.18005	0.0001	100	0.0818005	8.81938	0.0001	100	0.0881938	0	1e-06	1	0
Pp1-87B	17.0649	2.68364	1.37187	12.4392	0	1.44014	0.736193	0	0	2.98343	1.52512	0	0	1.70219	0.870156	0	0	1.95619	1	0
Pp1alpha-96A	18.0525	2.37231	0.94117	19.1809	0	3.63273	1.44122	0	0	0.65541	0.260022	0	0	2.47699	0.982699	0	0.361862	2.5206	1	0.361862
Pp2A-29B	17.5155	1.8734	1.49462	11.719	16.2558	1.28529	1.02542	15.8529	0	1.81981	1.45186	0	7.70864	1.09305	0.87205	8.83968	8.40683	1.25343	1	8.40683
Pp2B-14D	8.0462	1.72952	1.29367	6.21965	0	1.28707	0.962719	0	0	1.51262	1.13143	0	0	1.30133	0.973391	0	15.627	1.33691	1	15.627
ppan	18.3091	0.111729	0.794766	23.0371	0	0.105866	0.75306	0	0	0.293939	2.09088	0	0	0.157155	1.1179	0	0	0.140581	1	0
PpD3	0	0.168561	0.863019	0	0	0.176022	0.90122	0	0	0.496259	2.54081	0	0	0.217817	1.11521	0	15.1101	0.195315	1	15.1101
ppl	7.52277	0.357414	0.691611	10.8772	0	0.579922	1.12217	0	0	0.421315	0.815263	0	0	0.680575	1.31694	0	0	0.516785	1	0
PPO1	0	1e-06	1	0	0	0.0001	100	0	0	0.0001	100	0	0	0.0001	100	0	8.53887	1e-06	1	8.53887
Prat2	8.38781	0.00719732	4.70478	1.78283	15.9127	0.0001	0.0653685	243.431	0	0.0001	0.0653685	0	0	0.0001	0.0653685	0	0	0.00152979	1	0
prc	0	1e-06	1	0	24.2236	0.0001	100	0.242236	25.5505	0.0001	100	0.255505	8.33038	0.0001	100	0.0833038	0	1e-06	1	0
PRL-1	0	0.358548	1.27644	0	16.4285	0.3448	1.2275	13.3838	7.97213	0.349185	1.24311	6.41306	8.33289	0.258062	0.918707	9.07023	16.2079	0.280897	1	16.2079
Prm	0	1e-06	1	0	8.66353	0.0001	100	0.0866353	0	0.0001	100	0	0	0.0001	100	0	7.73785	1e-06	1	7.73785
prom	0	1e-06	0.000527029	0	16.7014	0.0001	0.0527029	316.897	0	0.0001	0.0527029	0	0	0.0001	0.0527029	0	8.04178	0.00189743	1	8.04178
Prp19	0	0.239705	0.965583	0	0	0.226311	0.911628	0	0.334532	0.203456	0.819563	0.408183	0	0.243535	0.98101	0	0	0.248249	1	0
Prp3	0	0.621584	1.39276	0	0	0.679886	1.52339	0	0	0.562419	1.26019	0	0	0.396218	0.88779	0	15.1706	0.446297	1	15.1706
Prx5	8.80099	1e-06	1	8.80099	0	0.0001	100	0	0	0.0001	100	0	0	0.0001	100	0	0	1e-06	1	0
ps	0	17.2158	0.79495	0	0	23.8279	1.10027	0	0	17.0108	0.785483	0	0	26.2883	1.21388	0	17.7376	21.6565	1	17.7376
Psa	9.39551	0.33951	1.13199	8.29997	15.8156	0.443979	1.48031	10.6839	0	1.14605	3.82116	0	0	0.253186	0.844173	0	7.88808	0.299922	1	7.88808
PsGEF	0	0.775498	0.852463	0	0	1.20254	1.32188	0	0	0.234362	0.257621	0	0	1.05628	1.16111	0	15.6359	0.909715	1	15.6359
Pu	16.3652	0.195947	0.816433	20.0448	0	0.205691	0.857029	0	0	0.237104	0.987917	0	8.45455	0.0711237	0.296344	28.5295	0	0.240004	1	0
pug	24.2044	0.0205441	1.23724	19.5632	24.1227	0.0280159	1.68722	14.2973	7.16078	0.0001	0.00602236	1189.03	0	0.0078343	0.47181	0	7.85538	0.0166048	1	7.85538
Pxd	0	1e-06	1	0	8.71309	0.0001	100	0.0871309	17.5165	0.0001	100	0.175165	1.35709	0.0001	100	0.0135709	0	1e-06	1	0
pyd	0	3.26395	2.03991	0	8.33887	1.61792	1.01117	8.24674	0	2.99695	1.87304	0	8.38016	0.761938	0.476198	17.5981	15.8971	1.60005	1	15.8971
pzg	0	0.301359	1.07854	0	16.141	0.234193	0.838162	19.2576	7.52388	0.0751767	0.269052	27.9644	0	0.261009	0.934133	0	17.7858	0.279413	1	17.7858
QIL1	0	1.28841	0.57363	0	0	2.67877	1.19265	0	0	2.98792	1.33029	0	16.074	2.72458	1.21304	13.251	15.5155	2.24607	1	15.5155
qsm	0	0.00263631	0.432148	0	0	0.0001	0.0163921	0	0	0.0001	0.0163921	0	8.47567	0.0001	0.0163921	517.057	0	0.00610049	1	0
Rab1	8.11115	2.80039	0.936796	8.6584	0	2.91129	0.973892	0	0	3.29426	1.10201	0	0	2.93105	0.980504	0	0	2.98933	1	0
Rab2	8.37417	3.02933	1.01447	8.2547	0	2.359	0.789993	0	0	2.59113	0.867727	0	0	2.64481	0.885705	0	7.87032	2.98611	1	7.87032
Rab3	0	3.05949	1.32723	0	23.2578	2.47883	1.07533	21.6284	0	3.62413	1.57217	0	0	2.03474	0.882683	0	0	2.30518	1	0
Rab32	15.8827	0.00887519	0.206876	76.7737	0.605042	0.0274761	0.640455	0.944705	0	0.0001	0.00233095	0	0	0.0146516	0.341523	0	0	0.0429009	1	0
Rab3-GEF	0	1.14982	1.00061	0	0	1.00505	0.874625	0	0	1.10573	0.962241	0	0	1.28564	1.11881	0	16.6426	1.14912	1	16.6426
Rab5	15.8448	1.90627	0.980324	16.1628	8.32971	1.99284	1.02484	8.12781	0	3.1225	1.60578	0	0	1.85718	0.95508	0	0	1.94453	1	0
Rab6	17.0392	0.549934	1.18351	14.3972	8.56624	0.309904	0.666941	12.8441	8.19478	0.291658	0.627676	13.0558	8.6845	0.39532	0.850766	10.2079	0	0.464664	1	0
Rab7	0	0.921618	0.704468	0	0	1.31903	1.00824	0	7.66593	0.905726	0.69232	11.0728	0	1.44272	1.10279	0	16.2848	1.30825	1	16.2848
Rac1	0	1.56893	1.4014	0	16.804	0.638832	0.570619	29.4487	8.42795	1.02055	0.911574	9.24549	0	0.751355	0.671126	0	0	1.11954	1	0
Rac2	0	0.0128188	0.0242461	0	0	0.0141977	0.0268543	0	0	0.0001	0.000189145	0	0	0.0389118	0.0735999	0	24.911	0.528694	1	24.911
RAF2	0	0.145674	1.4716	0	0	0.0258817	0.261458	0	0	0.132039	1.33387	0	0	0.116391	1.17578	0	16.6843	0.09899	1	16.6843
Rala	0	0.609314	0.885064	0	15.8099	0.248901	0.361544	43.7288	0	1.02192	1.48439	0	8.05247	0.738455	1.07265	7.50708	0	0.68844	1	0
RanGAP	0	0.0242552	0.395001	0	0	0.13198	2.14933	0	0	0.0001	0.00162852	0	0	0.0668863	1.08926	0	25.9207	0.0614055	1	25.9207
Rap1	0	7.02468	1.56788	0	0	2.66379	0.594546	0	8.13939	6.32722	1.41221	5.7636	0	3.53196	0.788318	0	8.25703	4.48038	1	8.25703
Ras64B	0	0.21062	0.595057	0	0	0.326507	0.922467	0	15.2188	0.0001	0.000282526	53867	0	0.398417	1.12563	0	0	0.353949	1	0
Ras85D	0	0.893784	0.60169	0	24.1789	1.88358	1.26801	19.0684	7.93122	0.420047	0.282773	28.048	8.13622	1.74864	1.17718	6.91164	0	1.48546	1	0
Rbp	0	6.82144	1.8108	0	0	2.76313	0.733494	0	0	3.14215	0.834106	0	0	3.09849	0.822518	0	5.02395	3.76708	1	5.02395
Rbp9	0	2.62693	0.901163	0	15.6265	9.09389	3.11963	5.00908	0	1.44919	0.497139	0	0	2.62072	0.89903	0	0	2.91505	1	0
Rcc1	9.19417	0.289698	1.03595	8.87512	0	0.44003	1.57353	0	0	0.348347	1.24567	0	0	0.283323	1.01315	0	0	0.279645	1	0
Rcd1	0	0.425719	1.13448	0	0	0.498301	1.3279	0	0	0.351928	0.937837	0	0	0.351996	0.938018	0	16.0335	0.375255	1	16.0335
Rcd5	0	0.284187	0.980391	0	0	0.192769	0.665016	0	0	0.308127	1.06298	0	0	0.241159	0.831952	0	15.9558	0.289871	1	15.9558
rdgA	9.52627	2.80156	0.536822	17.7457	0	4.38251	0.839755	0	0	0.667541	0.127911	0	0	8.27842	1.58627	0	0	5.2188	1	0
rdgC	0	1.14043	2.03758	0	0	1.16613	2.08349	0	14.9379	0.0001	0.000178667	83607.6	0	0.534127	0.954312	0	0	0.559699	1	0
Ref1	0	1.48148	1.2355	0	7.89591	0.896952	0.74803	10.5556	0	1.05844	0.882709	0	0	1.16137	0.96855	0	0	1.19909	1	0
Reg-2	8.33728	0.00981262	1.1479	7.26306	0	0.0001	0.0116982	0	15.0204	0.0001	0.0116982	1283.99	0	0.0001	0.0116982	0	0	0.00854831	1	0
Reps	0	0.293896	1.11152	0	0	0.502611	1.90089	0	0	0.653511	2.4716	0	0	0.208535	0.788687	0	25.0163	0.264408	1	25.0163
rept	0	0.138581	1.11786	0	0	0.0923728	0.745124	0	0	0.129525	1.04481	0	0	0.136914	1.10442	0	16.343	0.12397	1	16.343
retinin	0	1e-06	1.98709e-05	0	0	0.0001	0.00198709	0	1.86129	0.0001	0.00198709	936.692	1.76617	0.00526466	0.104613	16.8828	0	0.0503249	1	0
RFeSP	8.56868	5.06617	0.673702	12.7188	0	10.1689	1.35227	0	0	8.14818	1.08355	0	0	9.23216	1.2277	0	0	7.5199	1	0
rhea	0	0.920731	0.976297	0	0	0.702084	0.744454	0	17.1625	1.22137	1.29508	13.2521	16.2101	0.65047	0.689726	23.5022	0	0.943085	1	0
Rho1	8.11616	1.84789	0.961913	8.43752	0	1.83705	0.95627	0	0	2.47824	1.29004	0	0	1.41187	0.734945	0	8.18888	1.92105	1	8.18888
RhoGAP100F	0	2.59574	1.185	0	23.0355	2.07304	0.946383	24.3405	15.211	1.97952	0.903689	16.8321	0	2.16447	0.988123	0	20.8036	2.19049	1	20.8036
RhoGAP19D	0	2.83579	0.885729	0	0	5.58865	1.74555	0	0	3.42447	1.06959	0	0	3.54046	1.10582	0	15.3971	3.20165	1	15.3971
RhoGAP1A	0	0.106325	0.818529	0	0	0.188064	1.44778	0	0	0.0001	0.000769835	0	0	0.157132	1.20966	0	16.5529	0.129898	1	16.5529
RhoGAP92B	0	0.30255	1.23748	0	0	0.186918	0.764524	0	0	0.0001	0.000409016	0	0	0.23097	0.944705	0	15.6779	0.244489	1	15.6779
RhoGAPp190	0	3.27642	0.992528	0	8.02601	3.95853	1.19916	6.69303	7.88992	2.30655	0.698724	11.2919	0	2.72662	0.825976	0	17.9342	3.30109	1	17.9342
rin	0	4.72732	1.29581	0	7.93029	4.40383	1.20713	6.56951	0	1.88612	0.517005	0	16.1591	3.35354	0.919239	17.5788	0	3.64817	1	0
Rlip	0	1.0539	0.955995	0	16.0386	1.13033	1.02532	15.6426	0	0.857442	0.777784	0	15.8651	1.08385	0.983158	16.1369	7.74491	1.10242	1	7.74491
Rm62	1.13825	5.34111	1.01362	1.12295	0	5.88907	1.11762	0	0	5.20027	0.986896	0	0	5.30999	1.00772	0	0	5.26932	1	0
Rnp4F	0	0.475333	1.10669	0	0	0.311205	0.724559	0	0	0.113688	0.264693	0	0	0.406741	0.946992	0	15.4741	0.429509	1	15.4741
RnrL	15.6719	1e-06	0.000133255	117608	0	0.0001	0.0133255	0	0	0.0001	0.0133255	0	0	0.002166	0.288631	0	0	0.00750439	1	0
roh	0	6.13165	0.745716	0	0	8.60267	1.04623	0	8.49038	8.87815	1.07974	7.86337	17.3573	9.97394	1.213	14.3094	0	8.2225	1	0
Rop	17.021	2.28266	0.818957	20.7837	0	3.56587	1.27934	0	0	2.37624	0.852533	0	0	3.5025	1.2566	0	0	2.78728	1	0
row	0	0.665939	1.53428	0	0	0.318584	0.733995	0	0	0.420281	0.968298	0	0	0.341095	0.785859	0	15.707	0.434041	1	15.707
RpL10Ab	8.70786	7.7817	0.818319	10.6411	7.35857	8.39578	0.882895	8.33459	0	12.4982	1.31431	0	15.5853	7.74142	0.814084	19.1446	0	9.50937	1	0
RpL11	1.47551	6.55966	0.830788	1.77604	0	7.09607	0.898725	0	8.83138	8.92647	1.13055	7.8116	0	7.58611	0.960789	0	17.3751	7.89571	1	17.3751
RpL12	9.65836	10.7784	0.901517	10.7135	8.60465	12.0115	1.00465	8.56482	7.90462	11.2428	0.940358	8.40596	0	11.1924	0.936145	0	0	11.9559	1	0
RpL13	1.23377	11.1274	0.961299	1.28344	0	9.5395	0.824118	0	0	10.5817	0.914155	0	8.30127	10.9359	0.944756	8.78668	0	11.5754	1	0
RpL13A	1.09521	8.37616	0.799368	1.3701	0	9.12085	0.870436	0	0	8.78844	0.838713	0	0	8.52613	0.81368	0	0	10.4785	1	0
RpL14	1.14378	15.0741	0.855276	1.33732	0	18.8149	1.06752	0	0	14.1047	0.800276	0	0	16.9586	0.962196	0	7.82324	17.6248	1	7.82324
RpL17	1.84276	6.96277	0.773327	2.3829	0	8.98235	0.997634	0	0	6.98625	0.775936	0	0	7.78601	0.864762	0	0	9.00365	1	0
RpL18	1.07257	11.1231	0.890541	1.2044	0	10.3489	0.828558	0	0	7.7012	0.616574	0	0	12.7823	1.02338	0	0	12.4903	1	0
RpL18A	0	10.9599	0.83856	0	0	13.465	1.03023	0	0	12.1268	0.927843	0	0	11.0556	0.845885	0	8.48458	13.0699	1	8.48458
RpL21	0	17.9708	0.883436	0	8.3925	17.2964	0.850283	9.87024	0	18.9832	0.933208	0	0	21.8683	1.07504	0	0	20.3419	1	0
RpL23A	2.82838	10.8932	0.847368	3.33784	0	11.1753	0.869313	0	0	11.13	0.865786	0	0	12.8543	0.999919	0	0	12.8553	1	0
RpL24	2.40258	14.7345	0.961866	2.49783	0	15.3141	0.9997	0	0	13.0959	0.854902	0	0	13.9615	0.911404	0	0	15.3187	1	0
RpL27	1.09858	8.02597	0.798043	1.37659	0	8.28892	0.824189	0	0	7.27856	0.723727	0	0	9.24303	0.919059	0	0	10.0571	1	0
RpL27A	2.36096	15.7964	0.886409	2.66351	0	12.0488	0.676115	0	0	17.5822	0.986621	0	0	17.232	0.96697	0	0	17.8206	1	0
RpL3	3.12719	8.52719	0.833958	3.74982	0	10.3102	1.00834	0	0	8.97441	0.877696	0	0	8.91211	0.871603	0	0	10.225	1	0
RpL30	9.16969	3.9596	0.74827	12.2545	8.38541	5.88196	1.11155	7.5439	24.8812	6.15192	1.16257	21.4019	0	4.37688	0.827126	0	0	5.29167	1	0
RpL32	9.21149	13.9125	0.939741	9.80215	0	14.8882	1.00565	0	0	14.3033	0.966139	0	0	13.5021	0.912023	0	0	14.8046	1	0
RpL34a	17.9563	1.93472	0.900317	19.9444	0	1.95076	0.907779	0	0	2.2409	1.0428	0	0	2.06005	0.958636	0	0	2.14894	1	0
RpL34b	2.36053	5.66131	0.625541	3.77358	0	6.52062	0.72049	0	0	7.65649	0.845997	0	0	10.3641	1.14518	0	0	9.05026	1	0
RpL35	11.1061	7.6894	0.720695	15.4102	0	9.58493	0.898355	0	0	12.2374	1.14696	0	0	11.5839	1.08571	0	0	10.6694	1	0
RpL36	8.51715	22.3593	1.08582	7.844	7.99862	18.6713	0.906722	8.82147	0	24.9451	1.21139	0	0	19.5571	0.949738	0	0	20.5921	1	0
RpL37A	17.5867	11.6801	0.565907	31.077	0	9.93727	0.481464	0	0	14.868	0.720362	0	0	10.8514	0.525752	0	0	20.6397	1	0
RpL4	2.45149	4.77465	0.744401	3.29324	0	7.0349	1.09679	0	0	4.78067	0.74534	0	0	5.93365	0.925098	0	0	6.41408	1	0
RpL5	15.8791	15.9981	0.778536	20.3962	0	20.3195	0.988832	0	0	16.1695	0.786878	0	0	23.2919	1.13348	0	0	20.549	1	0
RpL6	3.35775	11.0129	0.824243	4.07373	0	13.2961	0.99513	0	0	14.4894	1.08444	0	0	12.499	0.935475	0	0	13.3612	1	0
RpL7	12.1123	12.6534	0.88594	13.6717	0	13.6286	0.954223	0	0	8.82726	0.61805	0	0	13.7206	0.960663	0	0	14.2824	1	0
RpL7-like	18.0484	0.00727712	4.70478	3.83619	0	0.0001	0.0646517	0	0	0.0001	0.0646517	0	0	0.0001	0.0646517	0	0	0.00154675	1	0
RpL8	1.05745	14.1053	0.959806	1.10173	0	12.0024	0.816714	0	0	13.5211	0.920054	0	0	15.1057	1.02788	0	8.14924	14.696	1	8.14924
RpLP0	8.77407	8.05371	0.917896	9.55889	16.0455	11.039	1.25814	12.7534	0	5.35582	0.610413	0	0	7.96411	0.907684	0	7.92379	8.7741	1	7.92379
RpLP1	0	12.6355	0.915808	0	15.8636	11.1578	0.808705	19.6161	0	9.00344	0.652561	0	0	11.9238	0.864227	0	0	13.7971	1	0
Rpn1	17.1951	0.381045	0.819594	20.98	0	0.310704	0.668295	0	0	0.439698	0.945752	0	0	0.47317	1.01775	0	7.95194	0.464919	1	7.95194
Rpn10	0	0.625316	0.768146	0	15.7807	0.667778	0.820308	19.2376	0	0.973222	1.19552	0	0	0.885251	1.08745	0	7.96225	0.814058	1	7.96225
Rpn2	16.2211	0.501754	1.10569	14.6706	0	0.385578	0.849677	0	0	0.734952	1.61957	0	0	0.439894	0.969369	0	0	0.453794	1	0
Rpn8	0	0.66572	1.00894	0	8.15035	0.772989	1.17151	6.95714	7.47066	0.723078	1.09587	6.81713	0	0.691201	1.04756	0	16.2579	0.659823	1	16.2579
Rpn9	8.814	0.736702	1.13889	7.73911	0	0.557692	0.862153	0	22.6614	0.343024	0.530291	42.7339	0	0.579603	0.896026	0	7.66229	0.646859	1	7.66229
RpS10b	8.85307	12.3424	1.03641	8.54208	16.0051	9.82164	0.824737	19.4063	0	12.5669	1.05526	0	0	10.3874	0.872242	0	7.85137	11.9088	1	7.85137
RpS12	9.36294	10.1138	0.81997	11.4186	16.0553	12.2208	0.990792	16.2045	7.87389	7.76339	0.629412	12.5099	0	12.1665	0.986389	0	16.3702	12.3343	1	16.3702
RpS13	16.368	9.63774	0.913215	17.9235	0	9.18781	0.870583	0	0	9.79677	0.928284	0	0	8.30807	0.787224	0	0	10.5536	1	0
RpS14b	1.01703	7.05499	0.949498	1.07112	0.328487	7.14951	0.962219	0.341385	0	9.12102	1.22755	0	0	6.95112	0.935517	0	0	7.43024	1	0
RpS15Ab	15.9905	0.507025	0.848966	18.8353	0	0.348211	0.583047	0	0	0.816602	1.36732	0	0	0.629964	1.05482	0	0	0.597226	1	0
RpS16	0.494569	6.57276	0.872656	0.56674	0	8.15616	1.08288	0	0	9.36295	1.24311	0	0	6.65222	0.883206	0	0	7.5319	1	0
RpS17	1.30262	12.8671	0.966735	1.34745	0	11.9527	0.898034	0	0	13.8988	1.04425	0	0	11.7576	0.883373	0	0	13.3099	1	0
RpS18	9.32601	9.74961	0.89636	10.4043	0	9.07553	0.834387	0	0	11.6922	1.07496	0	0	10.4382	0.959669	0	0	10.8769	1	0
RpS19a	16.4264	7.51812	1.00216	16.391	0	6.37775	0.850146	0	7.67877	7.70516	1.02709	7.47624	0	6.14436	0.819036	0	0	7.50194	1	0
RpS2	0	12.6448	0.828337	0	0	20.0042	1.31044	0	7.69361	10.0875	0.660811	11.6427	0	15.7105	1.02916	0	8.21667	15.2653	1	8.21667
RpS21	0	8.42045	0.802867	0	7.73985	9.09007	0.866713	8.93012	7.77417	7.6599	0.73035	10.6444	0	10.1116	0.964115	0	0	10.488	1	0
RpS23	1.36598	8.29411	1.05466	1.29518	0	6.50483	0.827142	0	9.14981	7.75332	0.985897	9.2807	0	6.65122	0.845756	0	0	7.86423	1	0
RpS24	2.23753	9.97575	0.879889	2.54297	0	7.75855	0.684326	0	7.06449	10.4276	0.919743	7.68094	0	11.9387	1.05303	0	0	11.3375	1	0
RpS25	0	23.268	0.963331	0	0	19.7034	0.815752	0	25.5813	25.2818	1.04671	24.4398	17.5745	23.7607	0.983732	17.8652	0	24.1536	1	0
RpS26	10.3694	16.6282	0.878965	11.7972	0	12.6736	0.669927	0	0	18.3976	0.972495	0	0	17.9789	0.950365	0	8.5379	18.9179	1	8.5379
RpS28b	8.89388	15.405	0.955917	9.30403	0	13.7998	0.856314	0	0	17.1028	1.06127	0	0	15.5895	0.967371	0	0	16.1154	1	0
RpS29	8.55609	15.9632	0.861978	9.92611	8.8723	16.9258	0.913958	9.70756	17.27	19.8001	1.06917	16.1528	8.77475	17.0544	0.920902	9.52843	0	18.5192	1	0
RpS3	17.4372	7.8003	0.92378	18.8759	0	7.51433	0.889912	0	0	5.38439	0.637666	0	0	8.18892	0.969803	0	0	8.44389	1	0
RpS5a	16.9357	6.40531	1.01649	16.661	0	6.93114	1.09993	0	0	6.69624	1.06266	0	17.0753	4.94593	0.784892	21.755	16.0877	6.30141	1	16.0877
RpS6	2.47095	11.2767	1.04088	2.3739	0	11.0086	1.01614	0	0	10.0133	0.924259	0	0	11.3614	1.0487	0	0	10.8338	1	0
RpS8	3.50234	16.1094	0.914719	3.82887	0	18.1676	1.03159	0	0	16.5947	0.942273	0	0	16.4637	0.934836	0	0	17.6114	1	0
RpS9	1.10151	13.5457	1.05971	1.03944	0	13.4525	1.05242	0	0	15.1533	1.18548	0	0	11.7711	0.920884	0	0	12.7824	1	0
Rpt1	17.3005	0.907966	1.05192	16.4466	0	0.750079	0.868998	0	23.4215	1.54536	1.79036	13.082	15.8244	0.803247	0.930595	17.0046	8.24928	0.863154	1	8.24928
Rpt2	24.8462	0.451764	0.92895	26.7466	7.8765	0.523203	1.07585	7.32121	0	0.619282	1.27341	0	0	0.540003	1.11039	0	16.529	0.486317	1	16.529
Rpt3	16.6125	1.03056	1.10209	15.0736	0	0.706619	0.755665	0	0	1.06476	1.13867	0	0	0.956488	1.02288	0	0	0.935095	1	0
Rpt4	16.8623	0.828601	1.11431	15.1325	0	0.901991	1.213	0	0	1.60019	2.15195	0	8.013	0.596374	0.802008	9.99117	24.0756	0.743602	1	24.0756
Rpt5	8.60343	0.54396	1.3524	6.36159	0	0.280282	0.696841	0	0	0.163489	0.406468	0	8.13731	0.344194	0.85574	9.50909	0	0.402217	1	0
Rpt6	16.1446	0.689734	0.875798	18.4342	0	0.980821	1.24541	0	0	1.12753	1.43169	0	0	0.723507	0.918681	0	16.4905	0.787549	1	16.4905
Rs1	12.0146	0.151173	0.823803	14.5843	0	0.324521	1.76844	0	0	0.0001	0.000544939	0	0	0.226465	1.2341	0	0	0.183507	1	0
Rsf1	0	3.80153	1.04735	0	15.9812	3.44241	0.948412	16.8505	0	2.63381	0.725636	0	0	3.66418	1.00951	0	0	3.62966	1	0
RSG7	0	3.90336	1.38052	0	0	2.82359	0.99863	0	0	1.83778	0.649974	0	0	2.67888	0.94745	0	23.9361	2.82746	1	23.9361
Rtnl1	0	8.89255	1.03589	0	8.07384	8.25853	0.962036	8.39245	7.76025	6.26091	0.729333	10.6402	0	9.24768	1.07726	0	17.9479	8.58443	1	17.9479
rtp	7.46197	0.00654327	0.0450934	165.478	0	0.0001	0.000689157	0	0.571211	0.0001	0.000689157	828.854	0	0.0342737	0.2362	0	0	0.145105	1	0
rump	25.1749	1.48583	1.47817	17.0311	0	0.808947	0.804777	0	0	1.64744	1.63895	0	0	0.873683	0.86918	0	0	1.00518	1	0
Sam-S	16.3667	2.00525	0.989199	16.5454	0	2.16921	1.07008	0	0	1.86	0.917549	0	0	2.36579	1.16706	0	0	2.02714	1	0
san	14.8785	0.539249	0.844463	17.6189	0	0.551204	0.863185	0	0	0.900106	1.40956	0	0	0.749749	1.17411	0	0	0.63857	1	0
Sap130	0	0.241119	1.03897	0	0	0.11361	0.489538	0	0	0.0883119	0.38053	0	0	0.259471	1.11804	0	24.8059	0.232076	1	24.8059
Sap47	0	19.2001	0.715519	0	0	32.1422	1.19783	0	0	61.1162	2.27759	0	0	32.1325	1.19747	0	2.03117	26.8337	1	2.03117
Sar1	0	1.76092	0.958356	0	7.88154	1.51208	0.822929	9.57743	0	1.70213	0.92636	0	0	1.63633	0.890549	0	7.88375	1.83744	1	7.88375
SCAR	0	0.815182	1.12595	0	0	0.654045	0.903384	0	0	0.301559	0.416521	0	0	0.626296	0.865056	0	24.1486	0.723995	1	24.1486
Scm	0	0.507837	1.19112	0	0	0.580727	1.36208	0	0	0.211495	0.496057	0	0	0.512503	1.20206	0	15.6741	0.426352	1	15.6741
Scp1	0	1e-06	0.000193986	0	7.53676	0.0001	0.0193986	388.521	0	0.0001	0.0193986	0	0	0.00106569	0.20673	0	0	0.00515501	1	0
scrib	24.0118	1.25497	1.57553	15.2404	23.9659	0.770558	0.967382	24.774	8.0511	1.31376	1.64934	4.8814	0	0.550762	0.691444	0	0	0.796539	1	0
scu	16.1416	0.475523	1.06922	15.0967	8.82065	0.51347	1.15454	7.63997	0	0.217837	0.489808	0	8.51532	0.387239	0.870708	9.77976	0	0.44474	1	0
SdhB	0	2.35122	0.648084	0	8.36244	4.95681	1.36628	6.12059	0	4.57216	1.26026	0	16.4894	4.39924	1.21259	13.5985	8.2699	3.62796	1	8.2699
SdhC	0	3.02177	0.748458	0	15.5582	5.77123	1.42947	10.8839	0	5.71418	1.41534	0	0	4.55733	1.1288	0	0	4.03733	1	0
sds22	0	0.167647	0.569172	0	0	0.309124	1.04949	0	0	0.207216	0.70351	0	0	0.324633	1.10215	0	8.03051	0.294546	1	8.03051
sdt	0	9.4086	1.51919	0	0	4.9362	0.797038	0	7.36046	7.99366	1.29072	5.70259	7.8279	6.40114	1.03358	7.57359	19.3975	6.19318	1	19.3975
se	0	0.0265599	0.80906	0	16.9602	0.150889	4.59635	3.68992	16.2604	0.148943	4.53705	3.58392	8.80242	0.00754235	0.229753	38.3125	7.87999	0.0328281	1	7.87999
sea	9.05284	0.0163927	4.25446	2.12785	0	0.0001	0.0259533	0	0	0.0001	0.0259533	0	0	0.0001	0.0259533	0	0	0.00385307	1	0
Sec13	15.9147	0.521401	0.943637	16.8653	0	0.335436	0.607076	0	0	0.814989	1.47498	0	0	0.514537	0.931215	0	0	0.552544	1	0
Sec24CD	0	0.224583	1.32128	0	0	0.112885	0.664131	0	0	0.228745	1.34576	0	0	0.128071	0.753476	0	15.9282	0.169974	1	15.9282
SF2	0	2.48568	1.02801	0	0	2.39002	0.988453	0	0.387367	2.86346	1.18426	0.327096	0	2.47327	1.02288	0	0	2.41794	1	0
Sf3a1	0	0.266881	1.30798	0	0	0.166342	0.815238	0	0	0.26603	1.30381	0	0	0.211112	1.03466	0	16.0369	0.204041	1	16.0369
Sfxn1-3	16.1845	0.769983	0.949664	17.0424	0	0.85496	1.05447	0	0	0.772491	0.952757	0	0	0.666027	0.821448	0	0	0.810796	1	0
sgg	8.57914	6.09642	1.22927	6.97906	16.0698	4.87653	0.983292	16.3428	0.209905	3.50324	0.706385	0.297154	0	5.31123	1.07094	0	15.988	4.95939	1	15.988
Sgs5	16.178	1e-06	1	16.178	16.2726	0.0001	100	0.162726	0	0.0001	100	0	0	0.0001	100	0	0	1e-06	1	0
Sh	0	23.8053	1.10745	0	0	23.5996	1.09788	0	0	20.2325	0.941238	0	0	22.8309	1.06212	0	15.3232	21.4956	1	15.3232
Shab	0	2.02291	1.14217	0	0	4.33258	2.44625	0	0	0.370479	0.209179	0	0	1.75898	0.993147	0	15.6011	1.77111	1	15.6011
shi	17.1563	12.1551	1.10566	15.5168	0	13.8328	1.25826	0	0	11.5594	1.05147	0	0	12.2948	1.11836	0	0.648771	10.9936	1	0.648771
shot	16.9552	1.82243	1.34832	12.5751	16.2989	1.15079	0.851404	19.1435	9.72909	1.2657	0.93642	10.3897	9.88573	1.12669	0.833577	11.8594	0	1.35163	1	0
shv	17.1415	0.0954802	1.21436	14.1157	0	0.0353554	0.449666	0	0	0.0001	0.00127185	0	0	0.107572	1.36815	0	0	0.0786259	1	0
sif	8.99782	3.52003	0.579419	15.529	15.6961	4.54545	0.74821	20.9782	0	1.4795	0.243536	0	0	8.8023	1.44891	0	3.07091	6.0751	1	3.07091
Sin3A	0	1.72417	1.16075	0	0	0.908729	0.611777	0	0	0.517133	0.348146	0	0	1.36705	0.92033	0	25.8051	1.48539	1	25.8051
S-Lap2	0	1e-06	1	0	0	0.0001	100	0	0	0.0001	100	0	8.16462	0.0001	100	0.0816462	0	1e-06	1	0
S-Lap7	0	1e-06	1	0	16.177	0.0001	100	0.16177	0	0.0001	100	0	0	0.0001	100	0	0	1e-06	1	0
Slh	0	0.048123	0.364274	0	0	0.0898977	0.680494	0	0	0.217837	1.64895	0	0	0.185234	1.40215	0	15.154	0.132107	1	15.154
sli	17.4284	0.145189	0.403097	43.2362	0	0.841743	2.33698	0	15.2065	0.55444	1.53933	9.87865	0	0.239309	0.664409	0	0	0.360184	1	0
SLIRP1	16.392	1e-06	1	16.392	0	0.0001	100	0	0	0.0001	100	0	0	0.0001	100	0	0	1e-06	1	0
Slmap	0	0.851373	1.3669	0	0	0.685648	1.10083	0	0	0.669854	1.07547	0	0	0.541795	0.869867	0	17.0778	0.622848	1	17.0778
sls	0	1e-06	1	0	17.1241	0.0001	100	0.171241	7.45568	0.0001	100	0.0745568	8.71042	0.0001	100	0.0871042	8.75657	1e-06	1	8.75657
SmB	0	0.930957	1.39957	0	0	0.752977	1.132	0	7.72626	0.86522	1.30074	5.93989	0	0.583412	0.877081	0	0	0.665174	1	0
SmD2	0	0.862177	1.005	0	16.3236	1.14637	1.33627	12.2158	0	0.709533	0.82707	0	0	0.843636	0.983388	0	15.6818	0.857887	1	15.6818
SmydA-9	0	1e-06	1	0	15.7888	0.0001	100	0.157888	7.59033	0.0001	100	0.0759033	8.04354	0.0001	100	0.0804354	0	1e-06	1	0
sn	0	0.465482	1.09241	0	16.0158	0.619968	1.45496	11.0077	15.348	0.325777	0.764545	20.0747	15.254	0.297173	0.697417	21.8721	7.72346	0.426106	1	7.72346
Snap24	0	1.16469	2.08306	0	0	0.5798	1.03698	0	0	0.635644	1.13686	0	0	0.317186	0.567291	0	16.2228	0.559124	1	16.2228
Snap29	0	0.343674	1.39812	0	0	0.147839	0.601432	0	0	0.113921	0.46345	0	0	0.21247	0.864363	0	23.9006	0.245811	1	23.9006
Snr1	0	0.591499	1.25922	0	15.9448	0.604812	1.28756	12.3837	7.79105	0.40558	0.863422	9.02346	16.2669	0.439459	0.935546	17.3876	16.1881	0.469735	1	16.1881
Snx6	0	0.47513	0.906208	0	0	0.599967	1.14431	0	0	0.216591	0.4131	0	0	0.481191	0.917768	0	16.5738	0.524306	1	16.5738
Sod1	8.15775	5.1946	0.902429	9.03976	0	5.32327	0.924782	0	0	9.17518	1.59395	0	0	6.00186	1.04267	0	0	5.75624	1	0
Sod2	17.3785	1.47265	0.694593	25.0197	0	3.26065	1.53792	0	0	2.45235	1.15668	0	0	2.51935	1.18828	0	0	2.12016	1	0
Spase25	0	0.862637	1.31018	0	0	0.480748	0.730164	0	0	0.769935	1.16938	0	15.6392	0.540311	0.820629	19.0576	8.10959	0.658411	1	8.10959
spidey	8.62561	1.51539	0.848046	10.1712	0	2.20326	1.23299	0	0	0.639817	0.358055	0	0	1.95222	1.0925	0	0	1.78692	1	0
Sply	16.2918	0.253839	1.11399	14.6248	0	0.105725	0.463981	0	0	0.47306	2.07604	0	0	0.181068	0.794627	0	0	0.227866	1	0
Spn28F	0	1e-06	1	0	15.4814	0.0001	100	0.154814	0	0.0001	100	0	0	0.0001	100	0	0	1e-06	1	0
Spn38F	16.8215	1e-06	0.00185491	9068.65	0	0.0165147	30.6333	0	0	0.0001	0.185491	0	0	0.0001	0.185491	0	0	0.00053911	1	0
Spn77Bb	0	1e-06	1	0	8.16058	0.0001	100	0.0816058	0	0.0001	100	0	0	0.0001	100	0	0	1e-06	1	0
sqd	9.06788	8.21841	1.27409	7.11713	17.0743	6.8538	1.06254	16.0693	16.8685	5.048	0.782588	21.5548	17.0832	5.49407	0.851741	20.0567	0	6.4504	1	0
Srp54	19.0654	0.577087	1.13038	16.8663	7.8807	0.368789	0.722375	10.9094	0	0.328058	0.642592	0	0	0.58802	1.1518	0	0	0.510522	1	0
Srp54k	16.793	0.227945	0.648345	25.9013	0	0.349107	0.992968	0	0	0.151206	0.430076	0	0	0.397678	1.13112	0	0	0.351579	1	0
Srp68	17.7451	0.0826179	0.769802	23.0515	0	0.0489145	0.455767	0	0	0.0001	0.000931762	0	15.6516	0.0881228	0.821095	19.0619	0	0.107324	1	0
Srp72	2.94514	0.227221	1.39685	2.10842	0	0.314349	1.93247	0	0	0.243446	1.49659	0	0	0.110938	0.681992	0	0	0.162667	1	0
SsRbeta	0	0.565435	1.0601	0	0	0.364455	0.683291	0	8.65075	1.2245	2.29574	3.76818	0	0.445876	0.835943	0	0	0.533381	1	0
Ssrp	0	0.171848	1.13568	0	23.0299	0.149658	0.989037	23.2852	0	0.0001	0.000660863	0	0	0.165848	1.09603	0	0	0.151317	1	0
ssx	0	1.1626	0.983553	0	15.6396	1.44854	1.22546	12.7622	7.88721	1.23261	1.04278	7.56364	0	1.2456	1.05378	0	0	1.18204	1	0
Stam	0	0.178248	0.871046	0	0	0.204735	1.00049	0	0	0.0001	0.000488672	0	0	0.200614	0.980342	0	15.7743	0.204636	1	15.7743
stnA	0	1e-06	1	0	0	0.0001	100	0	0	0.0001	100	0	0	0.0001	100	0	26.1433	1e-06	1	26.1433
stnB	0	1e-06	1	0	0	0.0001	100	0	0	0.0001	100	0	0	0.0001	100	0	20.0933	1e-06	1	20.0933
Strn-Mlck	0	0.0347179	0.672828	0	0	0.0001	0.00193798	0	14.3774	0.0001	0.00193798	7418.72	0	0.00593688	0.115056	0	8.48308	0.0516	1	8.48308
Su(z)2	0	0.511281	0.919273	0	0	0.480699	0.864288	0	0	0.441962	0.794638	0	0	0.617329	1.10994	0	24.3291	0.55618	1	24.3291
Surf6	18.4862	0.223182	0.876793	21.0839	0	0.334757	1.31513	0	0	0.0001	0.00039286	0	0	0.26586	1.04446	0	0	0.254543	1	0
Swim	0	1e-06	0.000118526	0	0	0.0001	0.0118526	0	1.19132	0.0001	0.0118526	100.511	0	0.0001	0.0118526	0	0	0.00843698	1	0
sxc	0	2.15527	1.0787	0	0	2.22926	1.11573	0	0	2.87848	1.44066	0	0	2.35106	1.17669	0	19.1097	1.99803	1	19.1097
Syn	0	2.54117	0.845028	0	0	3.7609	1.25063	0	0	1.75369	0.583165	0	0	3.58741	1.19294	0	3.22759	3.0072	1	3.22759
Syp	8.37323	7.18451	0.794901	10.5337	0.494176	10.5611	1.16848	0.42292	0	2.54175	0.281222	0	0	10.4943	1.16109	0	0	9.03825	1	0
Syt7	0	8.29131	0.933069	0	0	8.8338	0.994119	0	7.50573	6.59935	0.742664	10.1065	23.9251	11.3281	1.27481	18.7675	23.3159	8.88606	1	23.3159
Syx1A	0	14.2355	0.773416	0	0	21.1134	1.1471	0	23.7461	15.2028	0.825973	28.7492	0	23.9389	1.30061	0	16.5454	18.406	1	16.5454
Taf4	0	0.773456	1.05713	0	23.86	0.93112	1.27262	18.7488	23.5908	1.26198	1.72482	13.6773	0	0.729076	0.996471	0	17.0616	0.731658	1	17.0616
Taf6	0	0.24528	0.826206	0	16.6723	0.363408	1.22411	13.62	7.72409	0.855347	2.88116	2.6809	0	0.34366	1.15759	0	16.6826	0.296876	1	16.6826
Tango4	0	0.242558	1.33225	0	7.96506	0.12423	0.682332	11.6733	0	0.0001	0.00054925	0	0	0.170987	0.939146	0	0	0.182067	1	0
Tapdelta	8.52821	0.983101	1.05119	8.11293	0	0.577797	0.617813	0	0	1.3327	1.425	0	0	0.661268	0.707065	0	8.0363	0.935229	1	8.0363
tau	0	2.68985	0.918413	0	0	2.81115	0.959828	0	0	2.8903	0.986854	0	0	3.05076	1.04164	0	8.02652	2.9288	1	8.02652
Tctp	9.57696	6.32011	1.08883	8.79567	0	3.58321	0.617315	0	0	4.25009	0.732204	0	0	5.5398	0.954394	0	0	5.80452	1	0
TER94	0.608536	0.741675	0.946673	0.642816	0	0.72915	0.930687	0	0	0.6049	0.772094	0	8.45423	0.713755	0.911037	9.27979	16.8084	0.783454	1	16.8084
ThrRS	9.72917	0.494098	0.609256	15.9689	8.73249	0.945853	1.1663	7.48735	0	0.628781	0.775328	0	0	0.956472	1.17939	0	0.36524	0.810986	1	0.36524
Tig	0	1e-06	0.000442693	0	0	0.0001	0.0442693	0	16.4175	0.0001	0.0442693	370.855	7.91973	0.0001	0.0442693	178.899	0	0.0022589	1	0
Tim23	15.7125	1.7086	1.01716	15.4474	0	2.15198	1.28111	0	0	2.24535	1.3367	0	0	1.79341	1.06765	0	0	1.67977	1	0
Timp	16.887	0.0173118	0.116803	144.578	0	0.0001	0.000674701	0	0	0.0001	0.000674701	0	0	0.0652675	0.44036	0	0	0.148214	1	0
Tm1	0	3.80677	1.15202	0	15.1388	2.85274	0.863305	17.5359	0	2.99767	0.907165	0	15.8187	2.80395	0.848543	18.6422	0	3.30443	1	0
tmod	0	0.722308	1.19819	0	0	0.484946	0.804445	0	0	0.216591	0.359289	0	0	0.521331	0.864802	0	16.2304	0.602833	1	16.2304
Tom20	0	3.20444	0.900047	0	15.7161	3.96116	1.11259	14.1257	15.367	3.04835	0.856207	17.9477	0	3.95472	1.11078	0	0	3.5603	1	0
Tom40	0	1.10661	1.11311	0	0	1.17171	1.1786	0	15.861	0.484018	0.486862	32.578	0	1.07985	1.0862	0	0	0.994159	1	0
Top1	9.94527	3.06993	1.3295	7.48045	0	2.18601	0.946703	0	7.54918	3.01707	1.30661	5.77768	0	2.01174	0.871229	0	0	2.30908	1	0
Top2	0	0.41936	1.92964	0	8.91583	0.135089	0.621595	14.3435	0	0.123183	0.566813	0	16.8673	0.15602	0.717907	23.4952	0	0.217326	1	0
tou	0	2.23267	1.12202	0	0	2.03827	1.02432	0	0	2.17125	1.09115	0	0	1.92544	0.967618	0	23.5319	1.98987	1	23.5319
Tps1	1.59623	0.0556118	3.94759	0.404356	0	0.0001	0.00709847	0	0	0.0001	0.00709847	0	0	0.00275689	0.195697	0	0	0.0140875	1	0
tral	16.3426	2.62375	1.11915	14.6027	0	2.14381	0.914439	0	0	2.43821	1.04001	0	0	2.19179	0.934902	0	0	2.3444	1	0
Trap1	16.4914	0.463009	0.943807	17.4733	0	0.838049	1.7083	0	0	1.0309	2.10141	0	0	0.5078	1.03511	0	0	0.490576	1	0
Treh	23.2833	0.371859	0.248994	93.5095	0	0.31029	0.207768	0	0	0.0001	6.69591e-05	0	0	0.317951	0.212897	0	0	1.49345	1	0
Trl	0	0.134587	1.14566	0	16.2095	0.0851821	0.725103	22.3548	8.1382	0.0001	0.000851239	9560.41	8.05244	0.0992221	0.844617	9.53383	25.4563	0.117476	1	25.4563
trol	0	0.0391305	0.164365	0	8.67083	0.0229071	0.0962201	90.1146	18.4244	0.907235	3.81079	4.83479	17.6811	0.326045	1.36953	12.9103	0	0.23807	1	0
Tsf2	0	0.202145	1.65929	0	7.92672	0.0952031	0.781469	10.1434	0	0.123183	1.01114	0	7.77615	0.110647	0.908242	8.56176	0	0.121826	1	0
Tsp	0	1e-06	0.000105378	0	15.3384	0.0001	0.0105378	1455.56	0	0.0001	0.0105378	0	8.50326	0.0001	0.0105378	806.929	0	0.00948965	1	0
tsr	9.65418	3.07572	1.30277	7.41051	0	2.06118	0.873046	0	0	3.35113	1.41942	0	0	1.4855	0.629205	0	0	2.36091	1	0
Tsr1	16.2944	0.101819	1.86404	8.7414	0	0.0972851	1.78105	0	0	0.0001	0.00183075	0	0	0.0370768	0.678784	0	0	0.0546224	1	0
ttm50	24.9816	0.302374	0.84848	29.4427	0	0.566269	1.58898	0	0	0.39061	1.09608	0	0	0.39528	1.10918	0	0	0.356371	1	0
Tudor-SN	9.17048	0.296356	0.950302	9.65007	0.971301	0.47874	1.53514	0.632713	0	0.294695	0.944974	0	0	0.268782	0.861881	0	0	0.311855	1	0
Twdlbeta	0	1e-06	1	0	16.5119	0.0001	100	0.165119	0	0.0001	100	0	0	0.0001	100	0	0	1e-06	1	0
TwdlT	0	0.00262052	0.525957	0	16.2612	0.0001	0.0200707	810.196	16.818	0.0001	0.0200707	837.941	0	0.00369835	0.742283	0	0	0.00498239	1	0
twin	0	0.945673	1.36196	0	0	0.485116	0.698666	0	0	0.782443	1.12688	0	0	0.608261	0.876021	0	24.1932	0.694346	1	24.1932
Txl	8.50943	0.437258	1.08899	7.81409	8.34087	0.528049	1.3151	6.34238	7.64116	0.264041	0.657592	11.6199	0	0.370579	0.922924	0	0.353785	0.401528	1	0.353785
TyrRS	15.6944	0.349206	1.02151	15.3639	0	0.411038	1.20238	0	0	0.114824	0.335887	0	0	0.339588	0.993376	0	0	0.341852	1	0
TyrRS-m	15.0465	0.0978646	0.612155	24.5796	0	0.209831	1.31252	0	0	0.291224	1.82164	0	0	0.241999	1.51373	0	0	0.159869	1	0
U2af38	0	0.69001	1.1232	0	17.2204	0.496175	0.807674	21.321	0	0.798588	1.29994	0	8.88333	0.624099	1.01591	8.74422	8.2812	0.614326	1	8.2812
U2af50	0	1.03981	1.14067	0	8.7767	1.05305	1.15518	7.59766	16.5368	1.09639	1.20274	13.7493	0	0.944155	1.03573	0	16.0158	0.911583	1	16.0158
Uba1	0	0.616424	1.11312	0	0	0.555759	1.00357	0	0	0.91069	1.6445	0	0	0.45848	0.82791	0	7.88263	0.55378	1	7.88263
Ubc10	0	0.774515	0.74681	0	0	1.01197	0.975772	0	7.27557	1.02578	0.989085	7.35587	0	1.25245	1.20765	0	0	1.0371	1	0
Uev1A	16.6488	1.27668	0.911437	18.2665	0	1.64309	1.17302	0	0	1.53876	1.09854	0	0	1.22702	0.875988	0	0	1.40073	1	0
Unc-115a	8.10639	0.32196	0.70947	11.426	0	0.416806	0.918472	0	0	0.299296	0.659526	0	0	0.461718	1.01744	0	0	0.453804	1	0
unc-13	0	19.9536	1.08714	0	0	19.4551	1.05998	0	0	14.9904	0.81673	0	0	20.1792	1.09943	0	27.2893	18.3542	1	27.2893
unc-13-4A	0	4.17645	1.7703	0	0	2.18891	0.927828	0	0	4.04622	1.7151	0	0	0.996538	0.422408	0	26.3086	2.35918	1	26.3086
Unc-89	9.37407	1e-06	0.000529344	17708.8	0	0.0001	0.0529344	0	0	0.0001	0.0529344	0	0	0.00503707	2.66634	0	0	0.00188913	1	0
und	0	0.736122	1.0448	0	16.2974	0.607632	0.862434	18.897	0	0.418711	0.594292	0	0	0.754673	1.07114	0	15.6735	0.704555	1	15.6735
Upf3	18.6104	0.189315	1.27995	14.54	0	0.141584	0.957239	0	0	0.132039	0.892708	0	0	0.152342	1.02997	0	0	0.147909	1	0
UQCR-14	8.20073	5.68634	0.778072	10.5398	0	9.5795	1.31078	0	0	10.3943	1.42227	0	0	8.58461	1.17465	0	0	7.30825	1	0
UQCR-6.4	9.14347	4.33311	0.914256	10.001	0	6.13791	1.29506	0	0	6.52165	1.37602	0	0	5.26885	1.11169	0	0	4.7395	1	0
UQCR-Q	0	5.57415	0.713106	0	0	9.82452	1.25686	0	0	9.83617	1.25835	0	0	9.4357	1.20712	0	8.2512	7.81672	1	8.2512
Usp14	16.6782	0.735184	1.19059	14.0083	15.776	0.394696	0.63919	24.6812	0	0.753111	1.21962	0	8.0935	0.620242	1.00445	8.05764	16.5214	0.617494	1	16.5214
Usp2	0	1.69789	1.20964	0	15.6288	1.19791	0.85344	18.3128	7.6067	1.71468	1.2216	6.22682	0	1.29933	0.925693	0	0	1.40363	1	0
Usp5	0	0.199782	0.95005	0	0	0.323685	1.53927	0	0	0.362701	1.7248	0	0	0.191562	0.910964	0	25.2072	0.210285	1	25.2072
Usp7	0	2.12065	1.08624	0	0	2.48849	1.27466	0	0	2.12075	1.0863	0	0	1.78507	0.914352	0	16.3459	1.95228	1	16.3459
ValRS	17.8291	0.213511	1.21665	14.6543	0	0.225151	1.28298	0	0	0.151206	0.861617	0	0	0.192456	1.09667	0	0	0.175491	1	0
Vap33	8.70437	5.61134	1.00887	8.62785	0	5.8933	1.05956	0	0	5.59989	1.00681	0	0	5.51926	0.992312	0	1.19486	5.56201	1	1.19486
vari	15.8983	0.0468625	0.183256	86.7544	0	0.2266	0.886122	0	8.17213	0.0001	0.000391051	20897.9	0	0.306132	1.19713	0	7.98917	0.255721	1	7.98917
vas	15.6543	1e-06	0.00013766	113717	0	0.0264789	3.64508	0	0	0.0001	0.013766	0	0	0.00802588	1.10484	0	0	0.00726429	1	0
Vav	0	0.261357	0.946544	0	0	0.208343	0.754546	0	0	0.0001	0.000362165	0	0	0.252543	0.914623	0	15.7403	0.276117	1	15.7403
Vha100-1	0	2.04998	1.10955	0	7.59833	2.25275	1.2193	6.23171	0	2.87314	1.55509	0	0	1.83303	0.99213	0	17.2429	1.84757	1	17.2429
Vha26	8.77488	4.12133	0.722523	12.1448	0	6.41166	1.12405	0	0	6.48112	1.13623	0	0	6.70961	1.17628	0	0	5.70408	1	0
Vha44	17.8473	2.98077	0.718892	24.8262	16.2534	4.44717	1.07255	15.1539	7.80582	3.05627	0.737099	10.5899	0	4.96479	1.19739	0	16.6355	4.14634	1	16.6355
Vha55	0	4.72229	0.865894	0	0	4.54745	0.833834	0	0	4.62661	0.848349	0	0	6.50581	1.19293	0	0.643044	5.45366	1	0.643044
Vha68-1	16.4015	2.11571	0.634137	25.8643	0	3.40501	1.02058	0	0	3.15011	0.944175	0	0	4.14162	1.24136	0	0	3.33636	1	0
Vha68-2	1.08269	0.0299826	0.343324	3.15356	0	0.0001	0.00114508	0	0	0.0001	0.00114508	0	0	0.00443312	0.0507628	0	16.7318	0.0873302	1	16.7318
VhaAC39-1	16.2561	2.43932	0.752896	21.5914	0	3.28877	1.01508	0	0	3.32912	1.02753	0	8.60295	3.79041	1.16991	7.3535	17.3859	3.23991	1	17.3859
VhaSFD	17.1879	1.72347	0.776021	22.1487	7.7336	2.32441	1.0466	7.38923	0	2.25734	1.01641	0	15.6395	2.47331	1.11365	14.0434	0	2.22091	1	0
Vinc	0	0.0087055	0.168336	0	16.8923	0.061874	1.19644	14.1188	2.07736	0.0001	0.00193367	1074.31	8.99049	0.0001	0.00193367	4649.45	0	0.0517151	1	0
vito	18.2706	0.179031	1.22397	14.9274	0	0.185112	1.26554	0	0	0.484368	3.31144	0	0	0.153382	1.04861	0	0	0.146271	1	0
vkg	0	0.0247385	0.127554	0	16.035	0.0001	0.000515611	31099.1	10.4578	0.297885	1.53593	6.80878	16.9298	0.0116981	0.0603169	280.68	0	0.193945	1	0
Vps4	0	0.800465	1.04467	0	0	0.754754	0.985017	0	0	0.913391	1.19205	0	7.83263	0.743564	0.970412	8.07144	7.86876	0.766235	1	7.86876
wb	15.4859	1e-06	1	15.4859	8.14357	0.0001	100	0.0814357	7.5875	0.0001	100	0.075875	0	0.0001	100	0	7.76509	1e-06	1	7.76509
wdb	15.6947	7.44927	1.28762	12.1889	0	6.43886	1.11297	0	0	5.38527	0.930856	0	0	5.6602	0.978378	0	0	5.78529	1	0
Wdr82	0	0.469027	1.21062	0	15.4956	0.388538	1.00287	15.4513	7.85815	0.376552	0.971927	8.08512	7.7075	0.377279	0.973805	7.91483	0	0.387428	1	0
wds	0	0.266075	0.792283	0	0	0.221006	0.658083	0	0	0.113688	0.338526	0	0	0.382816	1.1399	0	16.1758	0.335833	1	16.1758
wrd	0	0.773863	0.988078	0	0	0.370058	0.472494	0	0	0.990452	1.26462	0	0	0.823056	1.05089	0	23.7855	0.7832	1	23.7855
wupA	0	0.0138401	4.70478	0	0	0.0001	0.0339938	0	8.88135	0.0001	0.0339938	261.264	0	0.0001	0.0339938	0	15.9852	0.00294171	1	15.9852
yellow-e	0	1e-06	1	0	0	0.0001	100	0	0	0.0001	100	0	23.9067	0.0001	100	0.239067	0	1e-06	1	0
Yp2	0	0.300213	4.24886	0	8.57095	0.0111022	0.157128	54.5477	0	0.0001	0.00141528	0	8.32454	0.00401794	0.0568651	146.391	15.3467	0.0706573	1	15.3467
yps	0	1.27087	1.12396	0	0	0.853696	0.75501	0	0	0.677762	0.599413	0	0	0.901771	0.797527	0	15.3121	1.13071	1	15.3121
Zasp66	0	1e-06	9.92499e-05	0	0	0.0001	0.00992499	0	0	0.0001	0.00992499	0	0	0.00240756	0.23895	0	8.08545	0.0100756	1	8.08545
zip	0	0.628393	0.805396	0	9.19604	0.872544	1.11832	8.22309	16.928	0.418711	0.536652	31.5437	0	0.722106	0.925506	0	0	0.780228	1	0
Zw	8.25493	0.0136006	1.48198	5.5702	0	0.0001	0.0108964	0	0	0.0001	0.0108964	0	0	0.0001	0.0108964	0	0	0.00917734	1	0
